# Supplementary material for: Fine Mapping of Leaf Trichome Density Revealed a 747-kb Region on Chromosome 1 in Cold-Hardy Hybrid Wine Grape Populations
Source: Front Plant Sci. 2021 Mar 3;12:587640. doi: 10.3389/fpls.2021.587640 (PMC7965957; doi:10.3389/fpls.2021.587640)
Supplement: Supplementary file 2 [file Table_2.XLSX]

## Sheet: SupplementaryTable1
Supplementary Table 1. Trichome density and incidence traits collected on various leaf positions in a cold-hardy hybrid grape population, GE1025.
Trichome type	Side of the leaf	Position on the leaf	Trichome density			Trichome incidence
			2018	2019	2019 Field	2018	2019	2019 Field
Ribbon	Adaxial	Leaf	X	X	X	X	X	X
		Vein		X	X		X	X
		Petiole		X		X	X
	Abaxial	Leaf		X	X	X	X	X
		Vein		X	X	X	X	X
		Petiole		X			X
Simple	Adaxial	Leaf		X	X	X	X	X
		Vein		X	X	X	X	X
		Petiole		X		X	X
	Abaxial	Leaf		X	X	X	X	X
		Vein		X	X	X	X	X
		Petiole		X			X
	Leaf margin		X	X		X	X

## Sheet: SupplementaryTable2
Supplementary Table 2. Primer and barcode sequences used for long-range PCR and pooled for nanpore sequencing targeting 3 trichome candidate genes on chromosome 1, using PN40024 12X v1 reference (NCBI Refseq annotation release 102, 2016-11-26).
Region (bp)	Candidate genes	Amplicon size (bp)	Primer sequence	Barcode (MN1264 sample)	Barcode (MN1246 sample)	Refseq name	CRIBI v1 name	CRIBI v2 name	Region v2 (bp)
8078892-8081451	Transcription factor WEREWOLF	2559	GGTCCAAAGAGAGAGGccaagttgtt (F)	CTTGTCCAGGGTTTGTGTAACCTT (F)	GTGTTACCGTGGGAATGAATCCTT (F)	LOC100852592	VIT_01s0127g00730	Vitvi01g00737	8472849-8473727
			CTGGTGCGTAAGGAAGAAGAGAATCC (R)	TTCTCGCAAAGGCAGAAAGTAGTC (R)	TTCAGGGAACAAACCAAGTTACGT (R)
9723164-9730323	Zinc finger protein 5	7159	CTAAGAACCAGTCATCCTCCCA (F)	AACTAGGCACAGCGAGTCTTGGTT (F)	GTTTCATCTATCGGAGGGAATGGA (F)	LOC100854597	VIT_01s0026g00850	Vitvi01g00845	10117667-10118410
			CAGGATCGTGAGCTAGGAAAGA (R)	AAGCGTTGAAACCTTTGTCCTCTC (R)	CAGGTAGAAAGAAGCAGAATCGGA (R)
19230144-19232730	SCARECROW-LIKE protein 21	2585	CCCTGATTCTCCATGGCAGAACATAC (F)	AAGAAAGTTGTCGGTGTCTTTGTG (F)	GAGTCTTGTGTCCCAGTTACCAGG (F)	LOC100256348	VIT_01s0010g02270	Vitvi01g01509	20426794-20428254
			TCTGAGACTACACTCATCCCTGGTTC (R)	TCGATTCCGTTTGTAGTCGTCTGT (R)	TTCGGATTCTATCGTGTTTCCCTA (R)
F: forward primer, R: reverse primer

## Sheet: SupplementaryTable3
Supplementary Table 3. Differences for foliar phylloxera traits measured weekly (W) after infestation (Clark et al., 2018) between trichome present and trichome absent GE1025 individuals on corresponding leaf positions measured in 2018 and 2019.
Trichome incidence of …			No. of galls			% Leaves with galls				Galls per leaf			Log10 No. galls	Visual rating	AUDPCb
			W1	W2	W3	W1	W2	W3	W4	W1	W2	W3	W3	W4	-
Ribbon	Adaxial	Leaf 18	ns	ns	ns	ns	ns	ns	ns	ns	ns	ns	ns	ns	ns
		Petiole 18	ns	ns	ns	ns	ns	ns	ns	ns	ns	ns	ns	ns	ns
	Abaxial	Leaf 18	ns	ns	ns	ns	ns	ns	ns	ns	ns	ns	ns	ns	ns
		Leaf 19F	ns	ns	ns	ns	ns	ns	ns	ns	ns	ns	ns	ns	ns
Simple	Adaxial	Leaf 19	0.003	nsᵃ	ns	ns	ns	ns	ns	0	0.001	ns	ns	ns	ns
		Leaf 19F	ns	ns	ns	ns	ns	ns	ns	ns	ns	ns	ns	ns	ns
		Vein 19	ns	ns	nsᵃ	0.005	ns	0.003	nsᵃ	ns	ns	0.042	0.007	0.003	0.001
		Petiole 18	ns	ns	ns	ns	ns	ns	ns	ns	ns	ns	ns	ns	ns
		Petiole 19	ns	ns	ns	ns	nsᵃ	ns	ns	ns	ns	ns	ns	ns	ns
	Abaxial	Leaf 18	ns	ns	0.026	ns	ns	ns	ns	ns	ns	0.03	ns	ns	ns
		Leaf 19	ns	ns	nsᵃ	ns	ns	ns	ns	ns	ns	nsᵃ	ns	ns	ns
		Leaf 19F	ns	ns	ns	ns	ns	ns	ns	ns	ns	ns	ns	ns	ns
		Vein 18	nsᵃ	ns	ns	ns	ns	ns	ns	nsᵃ	ns	ns	ns	ns	ns
		Vein 19	nsᵃ	nsᵃ	ns	ns	ns	ns	ns	0	ns	ns	ns	ns	ns
		Petiole 19	ns	ns	ns	ns	ns	ns	ns	ns	ns	ns	ns	ns	ns
	Leaf margin 18		ns	ns	ns	ns	ns	ns	ns	ns	ns	ns	ns	ns	ns
Shown are p-values of two-sided t-tests with unequal error variances; ns: not significant
ᵃ: significance at 0.1 level
ᵇAUDPC: area under disease progress curve over 3 weeks after infestation
T-tests were not performed for ribbon trichomes on leaf, petiole, and vein, and for simple trichomes on adaxial edge in 2019, ribbon trichomes on adaxial leaf, ribbon and simple trichomes on vein in 2019 field, due to unbalanced groups between trichome present and absent individuals.

## Sheet: SupplementaryTable4
Supplementary Table 4. Candidate genes based on PN40024 12X.v2 reference with v3 annotation (CRIBI) within fine mapped trichome density region on chromosome 1 of a cold-hardy hybrid population.
Chromosome	Start Position	End Position	Gene name	Strand	Gene function
1	12633178	12648131	Vitvi01g01029	+	uncharacterized protein
1	12653052	12654896	Vitvi01g01030	-	Expansin
1	12677325	12682278	Vitvi01g01031	-	GTP cyclohydrolase 1
1	12683402	12684115	Vitvi01g01032	+	Pentatricopeptide repeat-containing protein, mitochondrial
1	12691612	12692423	Vitvi01g02135	-	ULP_PROTEASE domain-containing protein
1	12754214	12759157	Vitvi01g01033	-	Methyltransf_11 domain-containing protein
1	12781296	12788202	Vitvi01g01034	+	RNA-binding KH domain-containing protein RCF3
1	12790042	12796420	Vitvi01g02136	-	Endosulphine
1	12797443	12797723	Vitvi01g02137	+	Uncharacterized protein
1	12802040	12803181	Vitvi01g01035	-	Photosynthetic NDH subcomplex L 2
1	12827485	12830471	Vitvi01g01036	+	uncharacterized endoplasmic reticulum membrane protein C16E8.02-like
1	12831198	12833491	Vitvi01g01037	-	Cytochrome P450 704B1
1	12835016	12836300	Vitvi01g01038	-	NAC transcription factor 29
1	12846280	12846466	Vitvi01g01039	-	NA
1	12871604	12897613	Vitvi01g01040	+	EF-hand domain-containing protein
1	12911624	12911774	Vitvi01g01043	-	NA
1	12945212	12955155	Vitvi01g01044	-	CULLIN_2 domain-containing protein
1	12956990	12962637	Vitvi01g01045	-	NA
1	12964204	12964571	Vitvi01g01046	-	Reverse transcriptase Ty1/copia-type domain-containing protein
1	12965297	12966729	Vitvi01g01047	-	Integrase catalytic domain-containing protein
1	12987605	12995331	Vitvi01g01048	-	Uncharacterized protein
1	12996755	12999624	Vitvi01g01049	+	Mitochondrial uncoupling protein 3
1	13024952	13025153	Vitvi01g01050	+	NA
1	13035607	13036092	Vitvi01g01051	-	NA
1	13045950	13048454	VviMYB140	+
1	13064761	13065375	Vitvi01g01053	-	probable protein S-acyltransferase 12
1	13110159	13124029	Vitvi01g01054	+	Peptidase_M28 domain-containing protein
1	13126164	13126826	Vitvi01g02138	+	Malectin domain-containing protein (Fragment)
1	13167287	13191040	Vitvi01g01055	+	serine/threonine-protein kinase STY8
1	13194269	13198082	Vitvi01g01056	-	GOLD domain-containing protein
1	13206051	13224947	Vitvi01g01057	+	O-fucosyltransferase family protein
1	13225104	13228183	Vitvi01g01058	-	SET domain-containing protein
1	13245378	13245570	Vitvi01g01060	-	NA
1	13257406	13262123	Vitvi01g01061	+	phosphate transporter PHO1 homolog 3-like
1	13263479	13268492	Vitvi01g02139	-	PCI domain-containing protein
1	13284608	13287001	Vitvi01g01062	+	Protein ALP1-like
1	13302652	13304710	Vitvi01g01063	+	NA
1	13304821	13304983	Vitvi01g01064	-	Uncharacterized protein
1	13305289	13305508	Vitvi01g01065	-	Protein kinase domain-containing protein
1	13306061	13326142	Vitvi01g01066	+	NA
1	13339297	13345118	Vitvi01g01067	+	NA
1	13345664	13347372	Vitvi01g01068	+	NA
1	13356122	13360541	Vitvi01g01069	+	NA
1	13370475	13370766	Vitvi01g01070	+	Transpos_assoc domain-containing protein
1	13379966	13385263	Vitvi01g01071	+	phosphate transporter PHO1 homolog 3-like

## Sheet: SupplementaryTable5
##fileformat=VCFv4.2
##FILTER=<ID=PASS,Description="All filters passed">
##bcftoolsVersion=1.9+htslib-1.9
##bcftoolsCommand=mpileup -a AD,DP --threads 16 -r Noirv2.chr1:12000000-13500000 -q 10 -f /data1/avikarn/genome/NoirV2/Noirv2.upper.fa -b bamfile
##reference=file:///data1/avikarn/genome/NoirV2/Noirv2.upper.fa
##contig=<ID=Noirv2.chr1,length=24233538>
##contig=<ID=Noirv2.chr2,length=18891843>
##contig=<ID=Noirv2.chr3,length=20695524>
##contig=<ID=Noirv2.chr4,length=24711646>
##contig=<ID=Noirv2.chr5,length=25650743>
##contig=<ID=Noirv2.chr6,length=22645733>
##contig=<ID=Noirv2.chr7,length=27355740>
##contig=<ID=Noirv2.chr8,length=22550362>
##contig=<ID=Noirv2.chr9,length=23006712>
##contig=<ID=Noirv2.chr10,length=23503040>
##contig=<ID=Noirv2.chr11,length=20118820>
##contig=<ID=Noirv2.chr12,length=24269032>
##contig=<ID=Noirv2.chr13,length=29075116>
##contig=<ID=Noirv2.chr14,length=30274277>
##contig=<ID=Noirv2.chr15,length=20304914>
##contig=<ID=Noirv2.chr16,length=23572818>
##contig=<ID=Noirv2.chr17,length=18691847>
##contig=<ID=Noirv2.chr18,length=34568450>
##contig=<ID=Noirv2.chr19,length=24695667>
##contig=<ID=Noirv2.chr0,length=27389308>
##ALT=<ID=*,Description="Represents allele(s) other than observed.">
##INFO=<ID=INDEL,Number=0,Type=Flag,Description="Indicates that the variant is an INDEL.">
##INFO=<ID=IDV,Number=1,Type=Integer,Description="Maximum number of reads supporting an indel">
##INFO=<ID=IMF,Number=1,Type=Float,Description="Maximum fraction of reads supporting an indel">
##INFO=<ID=DP,Number=1,Type=Integer,Description="Raw read depth">
##INFO=<ID=VDB,Number=1,Type=Float,Description="Variant Distance Bias for filtering splice-site artefacts in RNA-seq data (bigger is better)",Version="3">
##INFO=<ID=RPB,Number=1,Type=Float,Description="Mann-Whitney U test of Read Position Bias (bigger is better)">
##INFO=<ID=MQB,Number=1,Type=Float,Description="Mann-Whitney U test of Mapping Quality Bias (bigger is better)">
##INFO=<ID=BQB,Number=1,Type=Float,Description="Mann-Whitney U test of Base Quality Bias (bigger is better)">
##INFO=<ID=MQSB,Number=1,Type=Float,Description="Mann-Whitney U test of Mapping Quality vs Strand Bias (bigger is better)">
##INFO=<ID=SGB,Number=1,Type=Float,Description="Segregation based metric.">
##INFO=<ID=MQ0F,Number=1,Type=Float,Description="Fraction of MQ0 reads (smaller is better)">
##FORMAT=<ID=PL,Number=G,Type=Integer,Description="List of Phred-scaled genotype likelihoods">
##FORMAT=<ID=DP,Number=1,Type=Integer,Description="Number of high-quality bases">
##FORMAT=<ID=AD,Number=R,Type=Integer,Description="Allelic depths">
##FORMAT=<ID=GT,Number=1,Type=String,Description="Genotype">
##INFO=<ID=ICB,Number=1,Type=Float,Description="Inbreeding Coefficient Binomial test (bigger is better)">
##INFO=<ID=HOB,Number=1,Type=Float,Description="Bias in the number of HOMs number (smaller is better)">
##INFO=<ID=AC,Number=A,Type=Integer,Description="Allele count in genotypes for each ALT allele, in the same order as listed">
##INFO=<ID=AN,Number=1,Type=Integer,Description="Total number of alleles in called genotypes">
##INFO=<ID=DP4,Number=4,Type=Integer,Description="Number of high-quality ref-forward , ref-reverse, alt-forward and alt-reverse bases">
##INFO=<ID=MQ,Number=1,Type=Integer,Description="Average mapping quality">
##bcftools_callVersion=1.9+htslib-1.9
##bcftools_callCommand=call -mv -Ov --thread 16 -o trichome_12-13.5.vcf; Date=Fri Dec 11 09:15:48 2020
##SnpEffVersion="4.1l (build 2015-10-03), by Pablo Cingolani"
##SnpEffCmd="SnpEff noirv2 trichome_12-13.5.vcf "
##INFO=<ID=ANN,Number=.,Type=String,Description="Functional annotations: 'Allele	Annotation	Annotation_Impact	Gene_Name	Gene_ID	Feature_Type	Feature_ID	Transcript_BioType	Rank	HGVS.c	HGVS.p	cDNA.pos / cDNA.length	CDS.pos / CDS.length	AA.pos / AA.length	Distance	ERRORS / WARNINGS / INFO' ">
##INFO=<ID=LOF,Number=.,Type=String,Description="Predicted loss of function effects for this variant. Format: 'Gene_Name	Gene_ID	Number_of_transcripts_in_gene	Percent_of_transcripts_affected' ">
##INFO=<ID=NMD,Number=.,Type=String,Description="Predicted nonsense mediated decay effects for this variant. Format: 'Gene_Name	Gene_ID	Number_of_transcripts_in_gene	Percent_of_transcripts_affected' ">
#CHROM POS ID REF ALT QUAL FILTER INFO FORMAT 4876_1570_17233_HBEN0ADXX_20150212MN1246foursix_GTGAAA 4876_1570_17232_HBEN0ADXX_20150212MN1264sixfour_ACAGTG
Noirv2.chr1 12014149 . CATATA CATATATA 221.0 . INDEL;IDV=16;IMF=0.4;DP=69;VDB=0.820081;SGB=10.9211;MQSB=0.980549;MQ0F=0;ICB=0.3;HOB=0.125;AC=1;AN=4;DP4=23,28,10,8;MQ=59;ANN=CATATATA	splice_donor_variant&intron_variant	HIGH	Gene_Vitvi01g00981.t01	Gene_Vitvi01g00981.t01	transcript	Vitvi01g00981.t01	Coding	5\2	c.387+1_387+2insTA						;LOF=(Gene_Vitvi01g00981.t01	Gene_Vitvi01g00981.t01	1	1.00) GT:PL:DP:AD 0\2:255,0,255:40:22,18 0\2:0,87,255:29:29,0
Noirv2.chr1 12015574 . T C 161.0 . DP=58;VDB=0.462804;SGB=4.69269;RPB=0.99119;MQB=1;MQSB=1;BQB=0.741154;MQ0F=0;ICB=0.3;HOB=0.125;AC=1;AN=4;DP4=30,13,3,6;MQ=60;ANN=C	splice_acceptor_variant&intron_variant	HIGH	Gene_Vitvi01g00981.t01	Gene_Vitvi01g00981.t01	transcript	Vitvi01g00981.t01	Coding	1\2	c.91-2A>G						;LOF=(Gene_Vitvi01g00981.t01	Gene_Vitvi01g00981.t01	1	1.00) GT:PL:DP:AD 0\2:0,105,255:35:35,0 0\2:195,0,181:17:8,9
Noirv2.chr1 12016029 . GTTTTT GTTTTTT 59.0 . INDEL;IDV=11;IMF=0.478261;DP=51;VDB=0.278258;SGB=6.07412;MQSB=1;MQ0F=0;ICB=0.3;HOB=0.125;AC=1;AN=4;DP4=20,20,3,8;MQ=60;ANN=GTTTTTT	frameshift_variant	HIGH	Gene_Vitvi01g00981.t01	Gene_Vitvi01g00981.t01	transcript	Vitvi01g00981.t01	Coding	1\2	c.14_15insA	p.Thr7fs	14\295	14\251	5\216		GT:PL:DP:AD 0\2:93,0,83:23:12,11 0\2:0,84,200:28:28,0
Noirv2.chr1 12042348 . A G 257.0 . DP=30;VDB=0.658761;SGB=-0.451316;MQSB=1;MQ0F=0;AC=4;AN=4;DP4=0,0,9,4;MQ=60;ANN=G	stop_lost&splice_region_variant	HIGH	Gene_Vitvi01g00982.t01	Gene_Vitvi01g00982.t01	transcript	Vitvi01g00982.t01	Coding	4\2	c.727T>C	p.Ter243Glnext*?	727\229	727\229	243\242		,G	downstream_gene_variant	MODIFIER	Gene_Vitvi01g00983.t01	Gene_Vitvi01g00983.t01	transcript	Vitvi01g00983.t01	Coding		c.*1124T>C					1124	GT:PL:DP:AD 1\2:74,6,0:2:0,2 1\2:210,33,0:11:0,11
Noirv2.chr1 12042496 . C A 212.0 . DP=31;VDB=0.669846;SGB=4.69269;RPB=0.976604;MQB=1;MQSB=1;BQB=0.390772;MQ0F=0;ICB=0.5;HOB=0.5;AC=2;AN=4;DP4=10,12,3,6;MQ=60;ANN=A	splice_acceptor_variant&intron_variant	HIGH	Gene_Vitvi01g00982.t01	Gene_Vitvi01g00982.t01	transcript	Vitvi01g00982.t01	Coding	3\2	c.580-1G>T						,A	downstream_gene_variant	MODIFIER	Gene_Vitvi01g00983.t01	Gene_Vitvi01g00983.t01	transcript	Vitvi01g00983.t01	Coding		c.*976G>T					976	;LOF=(Gene_Vitvi01g00982.t01	Gene_Vitvi01g00982.t01	1	1.00) GT:PL:DP:AD 0\2:0,66,255:22:22,0 1\2:251,27,0:9:0,9
Noirv2.chr1 12042837 . TAAAAA TAAAA 20.2948 . INDEL;IDV=9;IMF=0.818182;DP=28;VDB=0.933862;SGB=1.94933;MQSB=1;MQ0F=0;ICB=0.3;HOB=0.125;AC=1;AN=4;DP4=5,18,2,3;MQ=60;ANN=TAAAA	frameshift_variant	HIGH	Gene_Vitvi01g00982.t01	Gene_Vitvi01g00982.t01	transcript	Vitvi01g00982.t01	Coding	3\2	c.439delT	p.Leu148fs	439\229	439\229	147\242		,TAAAA	upstream_gene_variant	MODIFIER	Gene_Vitvi01g00984.t01	Gene_Vitvi01g00984.t01	transcript	Vitvi01g00984.t01	Coding		c.-4678delA					4678	,TAAAA	downstream_gene_variant	MODIFIER	Gene_Vitvi01g00983.t01	Gene_Vitvi01g00983.t01	transcript	Vitvi01g00983.t01	Coding		c.*630delT					630	;LOF=(Gene_Vitvi01g00982.t01	Gene_Vitvi01g00982.t01	1	1.00) GT:PL:DP:AD 0\2:0,51,169:17:17,0 0\2:54,0,52:11:6,5
Noirv2.chr1 12042915 . C T 216.0 . DP=35;VDB=0.386524;SGB=7.4578;RPB=0.440655;MQB=1;MQSB=1;BQB=0.145625;MQ0F=0;ICB=0.5;HOB=0.5;AC=2;AN=4;DP4=4,18,8,5;MQ=60;ANN=T	splice_acceptor_variant&intron_variant	HIGH	Gene_Vitvi01g00982.t01	Gene_Vitvi01g00982.t01	transcript	Vitvi01g00982.t01	Coding	2\2	c.367-1G>A						,T	upstream_gene_variant	MODIFIER	Gene_Vitvi01g00984.t01	Gene_Vitvi01g00984.t01	transcript	Vitvi01g00984.t01	Coding		c.-4605C>T					4605	,T	downstream_gene_variant	MODIFIER	Gene_Vitvi01g00983.t01	Gene_Vitvi01g00983.t01	transcript	Vitvi01g00983.t01	Coding		c.*557G>A					557	;LOF=(Gene_Vitvi01g00982.t01	Gene_Vitvi01g00982.t01	1	1.00) GT:PL:DP:AD 0\2:0,66,255:22:22,0 1\2:255,39,0:13:0,13
Noirv2.chr1 12043052 . G A 216.0 . DP=33;VDB=0.890731;SGB=13.0002;RPB=0.826421;MQB=1;MQSB=1;BQB=0.896355;MQ0F=0;ICB=0.5;HOB=0.5;AC=2;AN=4;DP4=7,5,11,10;MQ=60;ANN=A	stop_gained	HIGH	Gene_Vitvi01g00982.t01	Gene_Vitvi01g00982.t01	transcript	Vitvi01g00982.t01	Coding	2\2	c.283C>T	p.Gln95*	283\229	283\229	95\242		,A	upstream_gene_variant	MODIFIER	Gene_Vitvi01g00984.t01	Gene_Vitvi01g00984.t01	transcript	Vitvi01g00984.t01	Coding		c.-4468G>A					4468	,A	downstream_gene_variant	MODIFIER	Gene_Vitvi01g00983.t01	Gene_Vitvi01g00983.t01	transcript	Vitvi01g00983.t01	Coding		c.*420C>T					420	;LOF=(Gene_Vitvi01g00982.t01	Gene_Vitvi01g00982.t01	1	1.00);NMD=(Gene_Vitvi01g00982.t01	Gene_Vitvi01g00982.t01
Noirv2.chr1 12043293 . TAAAAAAAAAAA TAAAAAAAAAAAAAAAAAA,TAAAAAAAAAAAAAA 101.0 . INDEL;IDV=15;IMF=0.714286;DP=37;VDB=0.100207;SGB=-5.02958;MQSB=0.908364;MQ0F=0;ICB=0.5;HOB=0.5;AC=1,1;AN=4;DP4=15,12,8,2;MQ=58;ANN=TAAAAAAAAAAAAAAAAAA	frameshift_variant	HIGH	Gene_Vitvi01g00982.t01	Gene_Vitvi01g00982.t01	transcript	Vitvi01g00982.t01	Coding	1\2	c.124_125insTTTTTTT	p.Thr46fs	124\229	124\229	42\242		,TAAAAAAAAAAAAAA	inframe_insertion	MODERATE	Gene_Vitvi01g00982.t01	Gene_Vitvi01g00982.t01	transcript	Vitvi01g00982.t01	Coding	1\2	c.124_125insTTT	p.Val42_Phe43insPhe	124\229	124\229	42\242		,TAAAAAAAAAAAAAAAAAA	upstream_gene_variant	MODIFIER	Gene_Vitvi01g00984.t01	Gene_Vitvi01g00984.t01	transcript	Vitvi01g00984.t01	Coding		c.-4222_-4216dupAAAAAAA					4215	,TAAAAAAAAAAAAAA	upstream_gene_variant	MODIFIER	Gene_Vitvi01g00984.t01	Gene_Vitvi01g00984.t01
Noirv2.chr1 12044823 . C T 483.0 . DP=37;VDB=0.567279;SGB=-1.3601;MQSB=1;MQ0F=0;AC=4;AN=4;DP4=0,0,12,23;MQ=60;ANN=T	stop_gained	HIGH	Gene_Vitvi01g00983.t01	Gene_Vitvi01g00983.t01	transcript	Vitvi01g00983.t01	Coding	3\2	c.357G>A	p.Trp119*	357\2092	357\2092	119\263		,T	upstream_gene_variant	MODIFIER	Gene_Vitvi01g00982.t01	Gene_Vitvi01g00982.t01	transcript	Vitvi01g00982.t01	Coding		c.-1395G>A					1395	,T	upstream_gene_variant	MODIFIER	Gene_Vitvi01g00984.t01	Gene_Vitvi01g00984.t01	transcript	Vitvi01g00984.t01	Coding		c.-2697C>T					2697	;LOF=(Gene_Vitvi01g00983.t01	Gene_Vitvi01g00983.t01	1	1.00);NMD=(Gene_Vitvi01g00983.t01	Gene_Vitvi01g00983.t01
Noirv2.chr1 12044824 . C T 216.0 . DP=37;VDB=0.472475;SGB=8.15014;RPB=0.999877;MQB=1;MQSB=1;BQB=0.888867;MQ0F=0;ICB=0.5;HOB=0.5;AC=2;AN=4;DP4=6,17,7,7;MQ=60;ANN=T	stop_gained	HIGH	Gene_Vitvi01g00983.t01	Gene_Vitvi01g00983.t01	transcript	Vitvi01g00983.t01	Coding	3\2	c.356G>A	p.Trp119*	356\2092	356\2092	119\263		,T	upstream_gene_variant	MODIFIER	Gene_Vitvi01g00982.t01	Gene_Vitvi01g00982.t01	transcript	Vitvi01g00982.t01	Coding		c.-1396G>A					1396	,T	upstream_gene_variant	MODIFIER	Gene_Vitvi01g00984.t01	Gene_Vitvi01g00984.t01	transcript	Vitvi01g00984.t01	Coding		c.-2696C>T					2696	;LOF=(Gene_Vitvi01g00983.t01	Gene_Vitvi01g00983.t01	1	1.00);NMD=(Gene_Vitvi01g00983.t01	Gene_Vitvi01g00983.t01
Noirv2.chr1 12050021 . A T 8.84466 . DP=159;VDB=0.459382;SGB=-7.79183;RPB=0.917473;MQB=0.999965;MQSB=0.000248593;BQB=0.240568;MQ0F=0;ICB=0.3;HOB=0.125;AC=1;AN=4;DP4=65,68,3,16;MQ=28;ANN=T	splice_acceptor_variant&intron_variant	HIGH	Gene_Vitvi01g00984.t01	Gene_Vitvi01g00984.t01	transcript	Vitvi01g00984.t01	Coding	1\2	c.23-2A>T						,T	upstream_gene_variant	MODIFIER	Gene_Vitvi01g00983.t01	Gene_Vitvi01g00983.t01	transcript	Vitvi01g00983.t01	Coding		c.-4554T>A					4554	;LOF=(Gene_Vitvi01g00984.t01	Gene_Vitvi01g00984.t01	1	1.00) GT:PL:DP:AD 0\2:43,0,252:86:71,14 0\2:0,83,255:66:62,4
Noirv2.chr1 12050022 . C T 283.0 . DP=159;VDB=0.0204646;SGB=-17.3043;RPB=0.619422;MQB=0.653183;MQSB=0.000257372;BQB=0.866093;MQ0F=0;ICB=0.5;HOB=0.5;AC=2;AN=4;DP4=49,51,18,32;MQ=28;ANN=T	splice_acceptor_variant&intron_variant	HIGH	Gene_Vitvi01g00984.t01	Gene_Vitvi01g00984.t01	transcript	Vitvi01g00984.t01	Coding	1\2	c.23-1C>T						,T	upstream_gene_variant	MODIFIER	Gene_Vitvi01g00983.t01	Gene_Vitvi01g00983.t01	transcript	Vitvi01g00983.t01	Coding		c.-4555G>A					4555	;LOF=(Gene_Vitvi01g00984.t01	Gene_Vitvi01g00984.t01	1	1.00) GT:PL:DP:AD 0\2:236,0,255:85:50,31 0\2:82,0,255:65:50,15
Noirv2.chr1 12050177 . G C 382.0 . DP=38;VDB=1.48645e-08;SGB=-1.08818;MQSB=0.225673;MQ0F=0;AC=4;AN=4;DP4=0,0,26,8;MQ=34;ANN=C	splice_donor_variant&intron_variant	HIGH	Gene_Vitvi01g00984.t01	Gene_Vitvi01g00984.t01	transcript	Vitvi01g00984.t01	Coding	3\2	c.55+1G>C						,C	upstream_gene_variant	MODIFIER	Gene_Vitvi01g00983.t01	Gene_Vitvi01g00983.t01	transcript	Vitvi01g00983.t01	Coding		c.-4710C>G					4710	;LOF=(Gene_Vitvi01g00984.t01	Gene_Vitvi01g00984.t01	1	1.00) GT:PL:DP:AD 1\2:255,72,0:24:0,24 1\2:154,30,0:10:0,10
Noirv2.chr1 12089976 . GAA GAAA 27.2396 . INDEL;IDV=5;IMF=0.416667;DP=21;VDB=0.491618;SGB=1.94933;MQSB=0.973684;MQ0F=0;ICB=0.3;HOB=0.125;AC=1;AN=4;DP4=2,14,0,5;MQ=36;ANN=GAAA	frameshift_variant	HIGH	Gene_Vitvi01g00986.t01	Gene_Vitvi01g00986.t01	transcript	Vitvi01g00986.t01	Coding	1\2	c.28_29insT	p.Leu11fs	29\260	28\244	10\27		,GAAA	upstream_gene_variant	MODIFIER	Gene_Vitvi01g00987.t01	Gene_Vitvi01g00987.t01	transcript	Vitvi01g00987.t01	Coding		c.-1223dupA					1222	;LOF=(Gene_Vitvi01g00986.t01	Gene_Vitvi01g00986.t01	1	1.00) GT:PL:DP:AD 0\2:61,0,103:12:7,5 0\2:0,27,127:9:9,0
Noirv2.chr1 12090005 . A G 10.154 . DP=19;VDB=0.02;SGB=0.00473136;RPB=0.90625;MQB=0.875;BQB=0.34375;MQ0F=0;ICB=0.3;HOB=0.125;AC=1;AN=4;DP4=0,16,0,2;MQ=37;ANN=G	start_lost	HIGH	Gene_Vitvi01g00986.t01	Gene_Vitvi01g00986.t01	transcript	Vitvi01g00986.t01	Coding	1\2	c.2T>C	p.Met1?	3\260	2\244	1\27		,G	upstream_gene_variant	MODIFIER	Gene_Vitvi01g00987.t01	Gene_Vitvi01g00987.t01	transcript	Vitvi01g00987.t01	Coding		c.-1196A>G					1196	;LOF=(Gene_Vitvi01g00986.t01	Gene_Vitvi01g00986.t01	1	1.00) GT:PL:DP:AD 0\2:0,33,182:11:11,0 0\2:44,0,102:7:5,2
Noirv2.chr1 12113586 . T C 221.0 . DP=57;VDB=0.522795;SGB=8.15014;RPB=0.999787;MQB=1;MQSB=1;BQB=0.711433;MQ0F=0;ICB=0.3;HOB=0.125;AC=1;AN=4;DP4=18,20,8,6;MQ=60;ANN=C	splice_acceptor_variant&intron_variant	HIGH	Gene_Vitvi01g02129.t01	Gene_Vitvi01g02129.t01	transcript	Vitvi01g02129.t01	Coding	1\2	c.110-1A>G						WARNING_TRANSCRIPT_MULTIPLE_STOP_CODONS,C	splice_acceptor_variant&intron_variant	HIGH	Gene_Vitvi01g02129.t02	Gene_Vitvi01g02129.t02	transcript	Vitvi01g02129.t02	Coding	1\2	c.110-1A>G						WARNING_TRANSCRIPT_MULTIPLE_STOP_CODONS,C	downstream_gene_variant	MODIFIER	Gene_Vitvi01g00988.t02	Gene_Vitvi01g00988.t02	transcript	Vitvi01g00988.t02	Coding		c.*2782A>G					1736	WARNING_TRANSCRIPT_MULTIPLE_STOP_CODONS,C	downstream_gene_variant	MODIFIER	Gene_Vitvi01g00988.t01	Gene_Vitvi01g00988.t01
Noirv2.chr1 12148646 . TATA TTA 152.0 . INDEL;IDV=15;IMF=0.483871;DP=64;VDB=0.474915;SGB=8.84268;MQSB=1;MQ0F=0;ICB=0.3;HOB=0.125;AC=1;AN=4;DP4=26,23,5,10;MQ=60;ANN=TTA	frameshift_variant	HIGH	Gene_Vitvi01g00990.t01	Gene_Vitvi01g00990.t01	transcript	Vitvi01g00990.t01	Coding	1\2	c.61delT	p.Tyr21fs	61\265	61\265	21\24		,TTA	upstream_gene_variant	MODIFIER	Gene_Vitvi01g00991.t01	Gene_Vitvi01g00991.t01	transcript	Vitvi01g00991.t01	Coding		c.-1979delA					1968	WARNING_TRANSCRIPT_MULTIPLE_STOP_CODONS;LOF=(Gene_Vitvi01g00990.t01	Gene_Vitvi01g00990.t01	1	1.00) GT:PL:DP:AD 0\2:0,99,255:33:33,0 0\2:186,0,247:31:16,14
Noirv2.chr1 12151707 . G T 221.0 . DP=67;VDB=0.888441;SGB=11.6141;RPB=0.402398;MQB=1;MQSB=1;BQB=0.96388;MQ0F=0;ICB=0.3;HOB=0.125;AC=1;AN=4;DP4=15,33,11,8;MQ=60;ANN=T	stop_gained	HIGH	Gene_Vitvi01g00991.t01	Gene_Vitvi01g00991.t01	transcript	Vitvi01g00991.t01	Coding	2\2	c.193G>T	p.Glu65*	204\2353	193\2046	65\247		WARNING_TRANSCRIPT_MULTIPLE_STOP_CODONS,T	upstream_gene_variant	MODIFIER	Gene_Vitvi01g00990.t01	Gene_Vitvi01g00990.t01	transcript	Vitvi01g00990.t01	Coding		c.-3000C>A					3000	;LOF=(Gene_Vitvi01g00991.t01	Gene_Vitvi01g00991.t01	1	1.00);NMD=(Gene_Vitvi01g00991.t01	Gene_Vitvi01g00991.t01	1	1.00) GT:PL:DP:AD 0\2:255,0,255:38:19,19 0\2:0,87,255:29:29,0
Noirv2.chr1 12156810 . T C 483.0 . DP=63;VDB=0.848269;SGB=-1.38614;MQSB=1;MQ0F=0;AC=4;AN=4;DP4=0,0,34,28;MQ=60;ANN=C	stop_lost	HIGH	Gene_Vitvi01g00991.t01	Gene_Vitvi01g00991.t01	transcript	Vitvi01g00991.t01	Coding	6\2	c.646T>C	p.Ter216Argext*?	657\2353	646\2046	216\247		WARNING_TRANSCRIPT_MULTIPLE_STOP_CODONS,C	upstream_gene_variant	MODIFIER	Gene_Vitvi01g00992.t01	Gene_Vitvi01g00992.t01	transcript	Vitvi01g00992.t01	Coding		c.-4089T>C					4089	GT:PL:DP:AD 1\2:255,87,0:29:0,29 1\2:255,99,0:33:0,33
Noirv2.chr1 12228124 . C T 221.0 . DP=67;VDB=0.109936;SGB=10.2282;RPB=0.672758;MQB=0.870588;MQSB=0.998841;BQB=0.407788;MQ0F=0;ICB=0.3;HOB=0.125;AC=1;AN=4;DP4=23,23,7,10;MQ=59;ANN=T	stop_gained	HIGH	Gene_Vitvi01g00996.t01	Gene_Vitvi01g00996.t01	transcript	Vitvi01g00996.t01	Coding	1\2	c.97C>T	p.Arg33*	97\277	97\277	33\28		GT:PL:DP:AD 0\2:0,123,255:41:41,0 0\2:255,0,93:22:5,17
Noirv2.chr1 12228178 . C T 470.0 . DP=61;VDB=0.215788;SGB=-11.4741;RPB=0.500592;MQB=0.33073;MQSB=0.909675;BQB=0.736712;MQ0F=0;ICB=0.5;HOB=0.5;AC=2;AN=4;DP4=15,13,11,20;MQ=59;ANN=T	stop_gained	HIGH	Gene_Vitvi01g00996.t01	Gene_Vitvi01g00996.t01	transcript	Vitvi01g00996.t01	Coding	1\2	c.151C>T	p.Gln51*	151\277	151\277	51\28		GT:PL:DP:AD 0\2:255,0,255:38:21,17 0\2:248,0,128:21:7,14
Noirv2.chr1 12266444 . T A 216.0 . DP=59;VDB=0.550846;SGB=7.4578;RPB=0.99351;MQB=1;MQSB=1;BQB=0.997787;MQ0F=0;ICB=0.3;HOB=0.125;AC=1;AN=4;DP4=16,28,6,7;MQ=60;ANN=A	stop_gained	HIGH	Gene_Vitvi01g00999.t01	Gene_Vitvi01g00999.t01	transcript	Vitvi01g00999.t01	Coding	1\2	c.125T>A	p.Leu42*	126\2206	125\2205	42\200		WARNING_TRANSCRIPT_MULTIPLE_STOP_CODONS;LOF=(Gene_Vitvi01g00999.t01	Gene_Vitvi01g00999.t01	1	1.00);NMD=(Gene_Vitvi01g00999.t01	Gene_Vitvi01g00999.t01	1	1.00) GT:PL:DP:AD 0\2:0,87,255:29:29,0 0\2:250,0,255:28:15,13
Noirv2.chr1 12274936 . GAAAAA GAAAAAA 137.0 . INDEL;IDV=10;IMF=0.666667;DP=26;VDB=0.00998064;SGB=-7.79186;MQSB=0.98995;MQ0F=0;ICB=0.3;HOB=0.125;AC=3;AN=4;DP4=1,6,3,16;MQ=58;ANN=GAAAAAA	frameshift_variant	HIGH	Gene_Vitvi01g01000.t01	Gene_Vitvi01g01000.t01	transcript	Vitvi01g01000.t01	Coding	2\2	c.161_162insT	p.Ser56fs	161\286	161\286	54\21		,GAAAAAA	upstream_gene_variant	MODIFIER	Gene_Vitvi01g01001.t01	Gene_Vitvi01g01001.t01	transcript	Vitvi01g01001.t01	Coding		c.-2169dupA					2168	;LOF=(Gene_Vitvi01g01000.t01	Gene_Vitvi01g01000.t01	1	1.00) GT:PL:DP:AD 1\2:69,6,0:11:2,9 0\2:101,0,27:15:5,10
Noirv2.chr1 12275048 . G T,A 337.0 . DP=37;VDB=0.544216;SGB=-1.24758;RPB=0.162607;MQB=1;MQSB=1;BQB=0.94394;MQ0F=0;ICB=0.5;HOB=0.5;AC=1,1;AN=4;DP4=9,0,18,8;MQ=60;ANN=A	stop_gained	HIGH	Gene_Vitvi01g01000.t01	Gene_Vitvi01g01000.t01	transcript	Vitvi01g01000.t01	Coding	2\2	c.55C>T	p.Gln19*	55\286	55\286	19\21		,T	missense_variant	MODERATE	Gene_Vitvi01g01000.t01	Gene_Vitvi01g01000.t01	transcript	Vitvi01g01000.t01	Coding	2\2	c.55C>A	p.Gln19Lys	55\286	55\286	19\21		,T	upstream_gene_variant	MODIFIER	Gene_Vitvi01g01001.t01	Gene_Vitvi01g01001.t01	transcript	Vitvi01g01001.t01	Coding		c.-2062G>T					2062	,A	upstream_gene_variant	MODIFIER	Gene_Vitvi01g01001.t01	Gene_Vitvi01g01001.t01
Noirv2.chr1 12275057 . G A 125.0 . DP=39;VDB=0.279539;SGB=5.38303;RPB=0.362064;MQB=1;MQSB=1;BQB=0.876336;MQ0F=0;ICB=0.3;HOB=0.125;AC=1;AN=4;DP4=20,8,10,0;MQ=60;ANN=A	stop_gained	HIGH	Gene_Vitvi01g01000.t01	Gene_Vitvi01g01000.t01	transcript	Vitvi01g01000.t01	Coding	2\2	c.46C>T	p.Gln16*	46\286	46\286	16\21		,A	upstream_gene_variant	MODIFIER	Gene_Vitvi01g01001.t01	Gene_Vitvi01g01001.t01	transcript	Vitvi01g01001.t01	Coding		c.-2053G>A					2053	GT:PL:DP:AD 0\2:159,0,94:15:5,10 0\2:0,69,255:23:23,0
Noirv2.chr1 12275906 . C T 120.0 . DP=56;VDB=0.410756;SGB=6.07412;RPB=0.0892081;MQB=0.900419;MQSB=0.996161;BQB=0.993465;MQ0F=0;ICB=0.3;HOB=0.125;AC=1;AN=4;DP4=6,34,0,11;MQ=59;ANN=T	splice_donor_variant&intron_variant	HIGH	Gene_Vitvi01g01000.t01	Gene_Vitvi01g01000.t01	transcript	Vitvi01g01000.t01	Coding	1\2	c.29+1G>A						,T	upstream_gene_variant	MODIFIER	Gene_Vitvi01g01001.t01	Gene_Vitvi01g01001.t01	transcript	Vitvi01g01001.t01	Coding		c.-1204C>T					1204	;LOF=(Gene_Vitvi01g01000.t01	Gene_Vitvi01g01000.t01	1	1.00) GT:PL:DP:AD 0\2:0,84,255:28:28,0 0\2:154,0,195:23:12,11
Noirv2.chr1 12305242 . A G 222.0 . DP=37;VDB=0.396728;SGB=10.2282;RPB=0.8215;MQB=0.642491;MQSB=0.263438;BQB=0.0899382;MQ0F=0;ICB=0.3;HOB=0.125;AC=1;AN=4;DP4=8,10,4,13;MQ=43;ANN=G	splice_acceptor_variant&intron_variant	HIGH	Gene_Vitvi01g01002.t01	Gene_Vitvi01g01002.t01	transcript	Vitvi01g01002.t01	Coding	5\2	c.100-2A>G						,G	upstream_gene_variant	MODIFIER	Gene_Vitvi01g01003.t01	Gene_Vitvi01g01003.t01	transcript	Vitvi01g01003.t01	Coding		c.-3856A>G					3856	;LOF=(Gene_Vitvi01g01002.t01	Gene_Vitvi01g01002.t01	1	1.00) GT:PL:DP:AD 0\2:255,0,255:33:16,17 0\2:0,6,35:2:2,0
Noirv2.chr1 12305253 . T C 7.8154 . DP=40;VDB=0.22;SGB=0.00473136;RPB=0.194444;MQB=0.416667;MQSB=0.504822;BQB=0.833333;MQ0F=0;ICB=0.3;HOB=0.125;AC=1;AN=4;DP4=12,24,1,1;MQ=44;ANN=C	splice_donor_variant&intron_variant	HIGH	Gene_Vitvi01g01002.t01	Gene_Vitvi01g01002.t01	transcript	Vitvi01g01002.t01	Coding	6\2	c.107+2T>C						,C	upstream_gene_variant	MODIFIER	Gene_Vitvi01g01003.t01	Gene_Vitvi01g01003.t01	transcript	Vitvi01g01003.t01	Coding		c.-3845T>C					3845	;LOF=(Gene_Vitvi01g01002.t01	Gene_Vitvi01g01002.t01	1	1.00) GT:PL:DP:AD 0\2:0,105,255:35:35,0 0\2:41,0,16:3:1,2
Noirv2.chr1 12321416 . G A 3.93574 . DP=43;VDB=0.228191;SGB=0.620439;RPB=0.526232;MQB=0.0174224;MQSB=0.625105;BQB=0.99446;MQ0F=0;ICB=0.3;HOB=0.125;AC=1;AN=4;DP4=16,20,3,0;MQ=46;ANN=A	stop_gained	HIGH	Gene_Vitvi01g01005.t01	Gene_Vitvi01g01005.t01	transcript	Vitvi01g01005.t01	Coding	4\2	c.541C>T	p.Gln181*	541\212	541\212	181\203		,A	upstream_gene_variant	MODIFIER	Gene_Vitvi01g01004.t01	Gene_Vitvi01g01004.t01	transcript	Vitvi01g01004.t01	Coding		c.-2262C>T					2262	GT:PL:DP:AD 0\2:0,81,255:27:27,0 0\2:37,0,210:12:9,3
Noirv2.chr1 12321477 . C T 155.0 . DP=55;VDB=0.0444992;SGB=5.38303;RPB=0.356484;MQB=0.00422177;MQSB=0.275971;BQB=0.840203;MQ0F=0;ICB=0.3;HOB=0.125;AC=1;AN=4;DP4=19,25,6,4;MQ=50;ANN=T	stop_gained	HIGH	Gene_Vitvi01g01005.t01	Gene_Vitvi01g01005.t01	transcript	Vitvi01g01005.t01	Coding	4\2	c.480G>A	p.Trp160*	480\212	480\212	160\203		,T	upstream_gene_variant	MODIFIER	Gene_Vitvi01g01004.t01	Gene_Vitvi01g01004.t01	transcript	Vitvi01g01004.t01	Coding		c.-2323G>A					2323	GT:PL:DP:AD 0\2:0,114,255:38:38,0 0\2:189,0,121:16:6,10
Noirv2.chr1 12321478 . C T 349.0 . DP=55;VDB=0.763823;SGB=-10.8604;RPB=0.503798;MQB=0.623832;MQSB=0.275971;BQB=0.962212;MQ0F=0;ICB=0.5;HOB=0.5;AC=2;AN=4;DP4=11,14,14,15;MQ=50;ANN=T	stop_gained	HIGH	Gene_Vitvi01g01005.t01	Gene_Vitvi01g01005.t01	transcript	Vitvi01g01005.t01	Coding	4\2	c.479G>A	p.Trp160*	479\212	479\212	160\203		,T	upstream_gene_variant	MODIFIER	Gene_Vitvi01g01004.t01	Gene_Vitvi01g01004.t01	transcript	Vitvi01g01004.t01	Coding		c.-2324G>A					2324	GT:PL:DP:AD 0\2:255,0,244:38:15,23 0\2:127,0,195:16:10,6
Noirv2.chr1 12321502 . A T 136.0 . DP=66;VDB=0.0839342;SGB=4.69269;RPB=0.111326;MQB=0.00353206;MQSB=0.3496;BQB=0.375241;MQ0F=0;ICB=0.3;HOB=0.125;AC=1;AN=4;DP4=28,27,7,2;MQ=50;ANN=T	stop_gained	HIGH	Gene_Vitvi01g01005.t01	Gene_Vitvi01g01005.t01	transcript	Vitvi01g01005.t01	Coding	4\2	c.455T>A	p.Leu152*	455\212	455\212	152\203		,T	upstream_gene_variant	MODIFIER	Gene_Vitvi01g01004.t01	Gene_Vitvi01g01004.t01	transcript	Vitvi01g01004.t01	Coding		c.-2348T>A					2348	GT:PL:DP:AD 0\2:0,105,255:35:35,0 0\2:170,0,254:29:20,9
Noirv2.chr1 12321553 . T C 221.0 . DP=72;VDB=0.168485;SGB=13.6932;RPB=0.97389;MQB=0.0468267;MQSB=0.532303;BQB=0.945204;MQ0F=0;ICB=0.3;HOB=0.125;AC=1;AN=4;DP4=24,25,18,4;MQ=51;ANN=C	splice_acceptor_variant&intron_variant	HIGH	Gene_Vitvi01g01005.t01	Gene_Vitvi01g01005.t01	transcript	Vitvi01g01005.t01	Coding	3\2	c.406-2A>G						,C	upstream_gene_variant	MODIFIER	Gene_Vitvi01g01004.t01	Gene_Vitvi01g01004.t01	transcript	Vitvi01g01004.t01	Coding		c.-2399A>G					2399	;LOF=(Gene_Vitvi01g01005.t01	Gene_Vitvi01g01005.t01	1	1.00) GT:PL:DP:AD 0\2:0,108,255:36:36,0 0\2:255,0,215:35:13,22
Noirv2.chr1 12321854 . GCCCACCCA GCCCA 221.0 . INDEL;IDV=16;IMF=0.444444;DP=66;VDB=0.00184072;SGB=8.84268;MQSB=0.952677;MQ0F=0;ICB=0.3;HOB=0.125;AC=1;AN=4;DP4=27,24,11,4;MQ=57;ANN=GCCCA	frameshift_variant	HIGH	Gene_Vitvi01g01005.t01	Gene_Vitvi01g01005.t01	transcript	Vitvi01g01005.t01	Coding	3\2	c.255_258delTGGG	p.Trp87fs	258\212	255\212	85\203		,GCCCA	upstream_gene_variant	MODIFIER	Gene_Vitvi01g01004.t01	Gene_Vitvi01g01004.t01	transcript	Vitvi01g01004.t01	Coding		c.-2708_-2705delTGGG					2705	;LOF=(Gene_Vitvi01g01005.t01	Gene_Vitvi01g01005.t01	1	1.00) GT:PL:DP:AD 0\2:255,0,255:36:21,15 0\2:0,90,255:30:30,0
Noirv2.chr1 12321928 . C T 221.0 . DP=61;VDB=0.645276;SGB=8.84268;RPB=0.329837;MQB=0.00946816;MQSB=0.899967;BQB=0.406709;MQ0F=0;ICB=0.3;HOB=0.125;AC=1;AN=4;DP4=18,23,9,6;MQ=51;ANN=T	stop_gained	HIGH	Gene_Vitvi01g01005.t01	Gene_Vitvi01g01005.t01	transcript	Vitvi01g01005.t01	Coding	3\2	c.189G>A	p.Trp63*	189\212	189\212	63\203		,T	upstream_gene_variant	MODIFIER	Gene_Vitvi01g01004.t01	Gene_Vitvi01g01004.t01	transcript	Vitvi01g01004.t01	Coding		c.-2774G>A					2774	;LOF=(Gene_Vitvi01g01005.t01	Gene_Vitvi01g01005.t01	1	1.00);NMD=(Gene_Vitvi01g01005.t01	Gene_Vitvi01g01005.t01	1	1.00) GT:PL:DP:AD 0\2:255,0,219:26:11,15 0\2:0,90,255:30:30,0
Noirv2.chr1 12321929 . C T 221.0 . DP=63;VDB=0.706638;SGB=9.53539;RPB=0.358588;MQB=0.0110832;MQSB=0.963444;BQB=0.618437;MQ0F=0;ICB=0.3;HOB=0.125;AC=1;AN=4;DP4=21,22,9,7;MQ=51;ANN=T	stop_gained	HIGH	Gene_Vitvi01g01005.t01	Gene_Vitvi01g01005.t01	transcript	Vitvi01g01005.t01	Coding	3\2	c.188G>A	p.Trp63*	188\212	188\212	63\203		,T	upstream_gene_variant	MODIFIER	Gene_Vitvi01g01004.t01	Gene_Vitvi01g01004.t01	transcript	Vitvi01g01004.t01	Coding		c.-2775G>A					2775	;LOF=(Gene_Vitvi01g01005.t01	Gene_Vitvi01g01005.t01	1	1.00);NMD=(Gene_Vitvi01g01005.t01	Gene_Vitvi01g01005.t01	1	1.00) GT:PL:DP:AD 0\2:255,0,228:29:13,16 0\2:0,90,255:30:30,0
Noirv2.chr1 12321970 . C T 221.0 . DP=73;VDB=0.843751;SGB=8.15014;RPB=0.936817;MQB=0.00269811;MQSB=0.638571;BQB=0.82441;MQ0F=0;ICB=0.3;HOB=0.125;AC=1;AN=4;DP4=21,36,7,7;MQ=49;ANN=T	splice_acceptor_variant&intron_variant	HIGH	Gene_Vitvi01g01005.t01	Gene_Vitvi01g01005.t01	transcript	Vitvi01g01005.t01	Coding	2\2	c.148-1G>A						,T	upstream_gene_variant	MODIFIER	Gene_Vitvi01g01004.t01	Gene_Vitvi01g01004.t01	transcript	Vitvi01g01004.t01	Coding		c.-2816G>A					2816	;LOF=(Gene_Vitvi01g01005.t01	Gene_Vitvi01g01005.t01	1	1.00) GT:PL:DP:AD 0\2:255,0,250:27:13,14 0\2:0,132,255:44:44,0
Noirv2.chr1 12322011 . C T 199.0 . DP=76;VDB=0.11727;SGB=10.2282;RPB=0.239544;MQB=0.926353;MQSB=0.390888;BQB=0.981688;MQ0F=0;ICB=0.3;HOB=0.125;AC=1;AN=4;DP4=25,30,5,12;MQ=49;ANN=T	splice_donor_variant&intron_variant	HIGH	Gene_Vitvi01g01005.t01	Gene_Vitvi01g01005.t01	transcript	Vitvi01g01005.t01	Coding	2\2	c.147+1G>A						,T	upstream_gene_variant	MODIFIER	Gene_Vitvi01g01004.t01	Gene_Vitvi01g01004.t01	transcript	Vitvi01g01004.t01	Coding		c.-2857G>A					2857	;LOF=(Gene_Vitvi01g01005.t01	Gene_Vitvi01g01005.t01	1	1.00) GT:PL:DP:AD 0\2:0,84,255:28:28,0 0\2:233,0,255:44:27,17
Noirv2.chr1 12322116 . G A 216.0 . DP=55;VDB=0.831982;SGB=15.7726;RPB=0.994598;MQB=0.00490147;MQSB=0.542837;BQB=0.999398;MQ0F=0;ICB=0.5;HOB=0.5;AC=2;AN=4;DP4=15,14,15,10;MQ=49;ANN=A	stop_gained	HIGH	Gene_Vitvi01g01005.t01	Gene_Vitvi01g01005.t01	transcript	Vitvi01g01005.t01	Coding	2\2	c.43C>T	p.Gln15*	43\212	43\212	15\203		,A	upstream_gene_variant	MODIFIER	Gene_Vitvi01g01004.t01	Gene_Vitvi01g01004.t01	transcript	Vitvi01g01004.t01	Coding		c.-2962C>T					2962	;LOF=(Gene_Vitvi01g01005.t01	Gene_Vitvi01g01005.t01	1	1.00);NMD=(Gene_Vitvi01g01005.t01	Gene_Vitvi01g01005.t01	1	1.00) GT:PL:DP:AD 1\2:255,41,0:26:1,25 0\2:0,84,255:28:28,0
Noirv2.chr1 12334626 . G A 198.0 . DP=33;VDB=0.46283;SGB=6.07412;RPB=0.999148;MQB=1;MQSB=1;BQB=0.206831;MQ0F=0;ICB=0.5;HOB=0.5;AC=2;AN=4;DP4=12,8,8,3;MQ=60;ANN=A	stop_gained	HIGH	Gene_Vitvi01g01006.t01	Gene_Vitvi01g01006.t01	transcript	Vitvi01g01006.t01	Coding	3\2	c.2635C>T	p.Gln879*	2649\2834	2635\2726	879\207		WARNING_TRANSCRIPT_MULTIPLE_STOP_CODONS,A	stop_gained	HIGH	Gene_Vitvi01g01006.t02	Gene_Vitvi01g01006.t02	transcript	Vitvi01g01006.t02	Coding	3\2	c.2635C>T	p.Gln879*	2649\2834	2635\2726	879\207		WARNING_TRANSCRIPT_MULTIPLE_STOP_CODONS GT:PL:DP:AD 0\2:0,60,255:20:20,0 1\2:237,33,0:11:0,11
Noirv2.chr1 12334691 . ATCCTTATCTTC ATCCTTATCTTCCTTATCTTC,ATCCTTATCTTCCTTATCTTCCTTATCTTC 186.0 . INDEL;IDV=19;IMF=0.703704;DP=42;VDB=0.650736;SGB=11.6141;MQSB=0.971594;MQ0F=0;ICB=1;HOB=0;AC=1,1;AN=4;DP4=11,12,8,11;MQ=59;ANN=ATCCTTATCTTCCTTATCTTC	splice_acceptor_variant&intron_variant	HIGH	Gene_Vitvi01g01006.t02	Gene_Vitvi01g01006.t02	transcript	Vitvi01g01006.t02	Coding	2\2	c.2559-1_2559insGAAGATAAG						WARNING_TRANSCRIPT_MULTIPLE_STOP_CODONS,ATCCTTATCTTCCTTATCTTCCTTATCTTC	splice_acceptor_variant&intron_variant	HIGH	Gene_Vitvi01g01006.t02	Gene_Vitvi01g01006.t02	transcript	Vitvi01g01006.t02	Coding	2\2	c.2559-1_2559insGAAGATAAGGAAGATAAG						WARNING_TRANSCRIPT_MULTIPLE_STOP_CODONS,ATCCTTATCTTCCTTATCTTC	splice_region_variant&intron_variant	LOW	Gene_Vitvi01g01006.t01	Gene_Vitvi01g01006.t01	transcript	Vitvi01g01006.t01	Coding	2\2	c.2564-6_2564-5insGAAGATAAG						WARNING_TRANSCRIPT_MULTIPLE_STOP_CODONS,ATCCTTATCTTCCTTATCTTCCTTATCTTC	splice_region_variant&intron_variant	LOW	Gene_Vitvi01g01006.t01	Gene_Vitvi01g01006.t01
Noirv2.chr1 12334863 . G A 134.0 . DP=33;VDB=0.348672;SGB=2.63044;RPB=0.831856;MQB=1;MQSB=1;BQB=0.948023;MQ0F=0;ICB=0.5;HOB=0.5;AC=2;AN=4;DP4=15,12,4,2;MQ=60;ANN=A	stop_gained	HIGH	Gene_Vitvi01g01006.t01	Gene_Vitvi01g01006.t01	transcript	Vitvi01g01006.t01	Coding	2\2	c.2452C>T	p.Arg818*	2466\2834	2452\2726	818\207		WARNING_TRANSCRIPT_MULTIPLE_STOP_CODONS,A	stop_gained	HIGH	Gene_Vitvi01g01006.t02	Gene_Vitvi01g01006.t02	transcript	Vitvi01g01006.t02	Coding	2\2	c.2452C>T	p.Arg818*	2466\2834	2452\2726	818\207		WARNING_TRANSCRIPT_MULTIPLE_STOP_CODONS;LOF=(Gene_Vitvi01g01006.t01	Gene_Vitvi01g01006.t01	1	1.00),(Gene_Vitvi01g01006.t02	Gene_Vitvi01g01006.t02	1	1.00);NMD=(Gene_Vitvi01g01006.t01	Gene_Vitvi01g01006.t01	1	1.00),(Gene_Vitvi01g01006.t02	Gene_Vitvi01g01006.t02	1	1.00) GT:PL:DP:AD 0\2:0,81,255:27:27,0 1\2:173,18,0:6:0,6
Noirv2.chr1 12334924 . T C 109.0 . DP=37;VDB=0.129741;SGB=4.00342;RPB=0.182157;MQB=1;MQSB=1;BQB=0.759361;MQ0F=0;ICB=0.3;HOB=0.125;AC=1;AN=4;DP4=16,12,7,1;MQ=60;ANN=C	stop_lost	HIGH	Gene_Vitvi01g01006.t01	Gene_Vitvi01g01006.t01	transcript	Vitvi01g01006.t01	Coding	2\2	c.2391A>G	p.Ter797Trpext*?	2405\2834	2391\2726	797\207		WARNING_TRANSCRIPT_MULTIPLE_STOP_CODONS,C	stop_lost	HIGH	Gene_Vitvi01g01006.t02	Gene_Vitvi01g01006.t02	transcript	Vitvi01g01006.t02	Coding	2\2	c.2391A>G	p.Ter797Trpext*?	2405\2834	2391\2726	797\207		WARNING_TRANSCRIPT_MULTIPLE_STOP_CODONS GT:PL:DP:AD 0\2:143,0,255:26:18,8 0\2:0,30,252:10:10,0
Noirv2.chr1 12334993 . T A 73.0 . DP=37;VDB=0.45314;SGB=1.27626;RPB=0.24288;MQB=1;MQSB=1;BQB=0.24288;MQ0F=0;ICB=0.5;HOB=0.5;AC=2;AN=4;DP4=17,12,1,3;MQ=60;ANN=A	stop_lost	HIGH	Gene_Vitvi01g01006.t01	Gene_Vitvi01g01006.t01	transcript	Vitvi01g01006.t01	Coding	2\2	c.2322A>T	p.Ter774Cysext*?	2336\2834	2322\2726	774\207		WARNING_TRANSCRIPT_MULTIPLE_STOP_CODONS,A	stop_lost	HIGH	Gene_Vitvi01g01006.t02	Gene_Vitvi01g01006.t02	transcript	Vitvi01g01006.t02	Coding	2\2	c.2322A>T	p.Ter774Cysext*?	2336\2834	2322\2726	774\207		WARNING_TRANSCRIPT_MULTIPLE_STOP_CODONS GT:PL:DP:AD 0\2:0,87,255:29:29,0 1\2:111,12,0:4:0,4
Noirv2.chr1 12334996 . T C 110.0 . DP=6;VDB=0.636041;SGB=1.41704;MQSB=1;MQ0F=0;AC=2;AN=2;DP4=0,0,2,3;MQ=60;ANN=C	stop_lost	HIGH	Gene_Vitvi01g01006.t01	Gene_Vitvi01g01006.t01	transcript	Vitvi01g01006.t01	Coding	2\2	c.2319A>G	p.Ter773Trpext*?	2333\2834	2319\2726	773\207		WARNING_TRANSCRIPT_MULTIPLE_STOP_CODONS,C	stop_lost	HIGH	Gene_Vitvi01g01006.t02	Gene_Vitvi01g01006.t02	transcript	Vitvi01g01006.t02	Coding	2\2	c.2319A>G	p.Ter773Trpext*?	2333\2834	2319\2726	773\207		WARNING_TRANSCRIPT_MULTIPLE_STOP_CODONS GT:PL:DP:AD ./.:0,0,0:0:0,0 1\2:137,15,0:5:0,5
Noirv2.chr1 12335005 . G T 97.0 . DP=39;VDB=0.636041;SGB=1.94933;RPB=0.726793;MQB=1;MQSB=1;BQB=0.133176;MQ0F=0;ICB=0.5;HOB=0.5;AC=2;AN=4;DP4=20,13,2,3;MQ=60;ANN=T	stop_gained	HIGH	Gene_Vitvi01g01006.t01	Gene_Vitvi01g01006.t01	transcript	Vitvi01g01006.t01	Coding	2\2	c.2310C>A	p.Cys770*	2324\2834	2310\2726	770\207		WARNING_TRANSCRIPT_MULTIPLE_STOP_CODONS,T	stop_gained	HIGH	Gene_Vitvi01g01006.t02	Gene_Vitvi01g01006.t02	transcript	Vitvi01g01006.t02	Coding	2\2	c.2310C>A	p.Cys770*	2324\2834	2310\2726	770\207		WARNING_TRANSCRIPT_MULTIPLE_STOP_CODONS;LOF=(Gene_Vitvi01g01006.t01	Gene_Vitvi01g01006.t01	1	1.00),(Gene_Vitvi01g01006.t02	Gene_Vitvi01g01006.t02	1	1.00);NMD=(Gene_Vitvi01g01006.t01	Gene_Vitvi01g01006.t01	1	1.00),(Gene_Vitvi01g01006.t02	Gene_Vitvi01g01006.t02	1	1.00) GT:PL:DP:AD 0\2:0,99,255:33:33,0 1\2:136,15,0:5:0,5
Noirv2.chr1 12335068 . C T 483.0 . DP=42;VDB=0.715217;SGB=-0.872769;MQSB=1;MQ0F=0;AC=4;AN=4;DP4=0,0,15,26;MQ=60;ANN=T	stop_gained	HIGH	Gene_Vitvi01g01006.t01	Gene_Vitvi01g01006.t01	transcript	Vitvi01g01006.t01	Coding	2\2	c.2247G>A	p.Trp749*	2261\2834	2247\2726	749\207		WARNING_TRANSCRIPT_MULTIPLE_STOP_CODONS,T	stop_gained	HIGH	Gene_Vitvi01g01006.t02	Gene_Vitvi01g01006.t02	transcript	Vitvi01g01006.t02	Coding	2\2	c.2247G>A	p.Trp749*	2261\2834	2247\2726	749\207		WARNING_TRANSCRIPT_MULTIPLE_STOP_CODONS;LOF=(Gene_Vitvi01g01006.t01	Gene_Vitvi01g01006.t01	1	1.00),(Gene_Vitvi01g01006.t02	Gene_Vitvi01g01006.t02	1	1.00);NMD=(Gene_Vitvi01g01006.t01	Gene_Vitvi01g01006.t01	1	1.00),(Gene_Vitvi01g01006.t02	Gene_Vitvi01g01006.t02	1	1.00) GT:PL:DP:AD 1\2:255,90,0:30:0,30 1\2:255,33,0:11:0,11
Noirv2.chr1 12335169 . A G 457.0 . DP=39;VDB=0.792143;SGB=-9.32613;RPB=0.793105;MQB=1;MQSB=1;BQB=0.983652;MQ0F=0;ICB=0.3;HOB=0.125;AC=3;AN=4;DP4=6,8,11,13;MQ=60;ANN=G	stop_lost	HIGH	Gene_Vitvi01g01006.t01	Gene_Vitvi01g01006.t01	transcript	Vitvi01g01006.t01	Coding	2\2	c.2146T>C	p.Ter716Glnext*?	2160\2834	2146\2726	716\207		WARNING_TRANSCRIPT_MULTIPLE_STOP_CODONS,G	stop_lost	HIGH	Gene_Vitvi01g01006.t02	Gene_Vitvi01g01006.t02	transcript	Vitvi01g01006.t02	Coding	2\2	c.2146T>C	p.Ter716Glnext*?	2160\2834	2146\2726	716\207		WARNING_TRANSCRIPT_MULTIPLE_STOP_CODONS GT:PL:DP:AD 0\2:255,0,255:29:14,15 1\2:236,27,0:9:0,9
Noirv2.chr1 12336218 . CAAAAAA CAAAAAAA 79.0 . INDEL;IDV=27;IMF=0.586957;DP=85;VDB=0.789719;SGB=17.852;MQSB=1;MQ0F=0;ICB=0.3;HOB=0.125;AC=1;AN=4;DP4=31,26,9,19;MQ=60;ANN=CAAAAAAA	frameshift_variant	HIGH	Gene_Vitvi01g01006.t01	Gene_Vitvi01g01006.t01	transcript	Vitvi01g01006.t01	Coding	1\2	c.1121_1122insT	p.Leu376fs	1135\2834	1121\2726	374\207		WARNING_TRANSCRIPT_MULTIPLE_STOP_CODONS,CAAAAAAA	frameshift_variant	HIGH	Gene_Vitvi01g01006.t02	Gene_Vitvi01g01006.t02	transcript	Vitvi01g01006.t02	Coding	1\2	c.1121_1122insT	p.Leu376fs	1135\2834	1121\2726	374\207		WARNING_TRANSCRIPT_MULTIPLE_STOP_CODONS,CAAAAAAA	upstream_gene_variant	MODIFIER	Gene_Vitvi01g01007.t01	Gene_Vitvi01g01007.t01	transcript	Vitvi01g01007.t01	Coding		c.-4965dupA					4955	;LOF=(Gene_Vitvi01g01006.t01	Gene_Vitvi01g01006.t01	1	1.00),(Gene_Vitvi01g01006.t02	Gene_Vitvi01g01006.t02
Noirv2.chr1 12336657 . A T 221.0 . DP=73;VDB=0.710521;SGB=16.4657;RPB=0.953102;MQB=1;MQSB=1;BQB=0.167597;MQ0F=0;ICB=0.3;HOB=0.125;AC=1;AN=4;DP4=16,28,9,17;MQ=60;ANN=T	stop_gained	HIGH	Gene_Vitvi01g01006.t01	Gene_Vitvi01g01006.t01	transcript	Vitvi01g01006.t01	Coding	1\2	c.689T>A	p.Leu230*	703\2834	689\2726	230\207		WARNING_TRANSCRIPT_MULTIPLE_STOP_CODONS,T	stop_gained	HIGH	Gene_Vitvi01g01006.t02	Gene_Vitvi01g01006.t02	transcript	Vitvi01g01006.t02	Coding	1\2	c.689T>A	p.Leu230*	703\2834	689\2726	230\207		WARNING_TRANSCRIPT_MULTIPLE_STOP_CODONS,T	upstream_gene_variant	MODIFIER	Gene_Vitvi01g01007.t01	Gene_Vitvi01g01007.t01	transcript	Vitvi01g01007.t01	Coding		c.-4532A>T					4523	;LOF=(Gene_Vitvi01g01006.t01	Gene_Vitvi01g01006.t01	1	1.00),(Gene_Vitvi01g01006.t02	Gene_Vitvi01g01006.t02
Noirv2.chr1 12341980 . TCTCTGCA TCTCTGCACTCTGCA 200.0 . INDEL;IDV=9;IMF=0.75;DP=12;VDB=0.721559;SGB=3.78914;MQSB=0.935451;MQ0F=0;ICB=1;HOB=0.5;AC=1;AN=2;DP4=1,2,6,3;MQ=39;ANN=TCTCTGCACTCTGCA	frameshift_variant	HIGH	Gene_Vitvi01g01007.t01	Gene_Vitvi01g01007.t01	transcript	Vitvi01g01007.t01	Coding	2\2	c.665_671dupCTCTGCA	p.Gln224fs	681\237	672\287	224\228		,TCTCTGCACTCTGCA	upstream_gene_variant	MODIFIER	Gene_Vitvi01g01006.t01	Gene_Vitvi01g01006.t01	transcript	Vitvi01g01006.t01	Coding		c.-4643_-4642insTGCAGAG					4629	WARNING_TRANSCRIPT_MULTIPLE_STOP_CODONS,TCTCTGCACTCTGCA	upstream_gene_variant	MODIFIER	Gene_Vitvi01g01006.t02	Gene_Vitvi01g01006.t02	transcript	Vitvi01g01006.t02	Coding		c.-4643_-4642insTGCAGAG					4629	WARNING_TRANSCRIPT_MULTIPLE_STOP_CODONS GT:PL:DP:AD 0\2:232,0,65:12:3,9 ./.:0,0,0:0:0,0
Noirv2.chr1 12368536 . A G 483.0 . DP=57;VDB=0.22522;SGB=-1.38354;MQSB=1;MQ0F=0;AC=4;AN=4;DP4=0,0,25,27;MQ=57;ANN=G	stop_lost	HIGH	Gene_Vitvi01g02132.t01	Gene_Vitvi01g02132.t01	transcript	Vitvi01g02132.t01	Coding	2\2	c.488A>G	p.Ter163Trpext*?	538\287	488\283	163\226		WARNING_TRANSCRIPT_MULTIPLE_STOP_CODONS,G	downstream_gene_variant	MODIFIER	Gene_Vitvi01g01008.t01	Gene_Vitvi01g01008.t01	transcript	Vitvi01g01008.t01	Coding		c.*3620T>C					3311	WARNING_TRANSCRIPT_MULTIPLE_STOP_CODONS GT:PL:DP:AD 1\2:255,90,0:30:0,30 1\2:255,66,0:22:0,22
Noirv2.chr1 12402786 . T A 483.0 . DP=59;VDB=0.550791;SGB=-1.38595;MQSB=1;MQ0F=0;AC=4;AN=4;DP4=0,0,29,30;MQ=60;ANN=A	stop_gained	HIGH	Gene_Vitvi01g01010.t01	Gene_Vitvi01g01010.t01	transcript	Vitvi01g01010.t01	Coding	2\2	c.1133T>A	p.Leu378*	1346\2399	1133\2168	378\221		WARNING_TRANSCRIPT_MULTIPLE_STOP_CODONS;LOF=(Gene_Vitvi01g01010.t01	Gene_Vitvi01g01010.t01	1	1.00);NMD=(Gene_Vitvi01g01010.t01	Gene_Vitvi01g01010.t01	1	1.00) GT:PL:DP:AD 1\2:255,96,0:32:0,32 1\2:255,81,0:27:0,27
Noirv2.chr1 12404314 . C A 477.0 . DP=59;VDB=0.0375036;SGB=-11.4741;RPB=0.533633;MQB=1;MQSB=1;BQB=0.465796;MQ0F=0;ICB=0.5;HOB=0.5;AC=2;AN=4;DP4=13,12,16,15;MQ=60;ANN=A	stop_gained	HIGH	Gene_Vitvi01g01010.t01	Gene_Vitvi01g01010.t01	transcript	Vitvi01g01010.t01	Coding	4\2	c.1790C>A	p.Ser597*	2003\2399	1790\2168	597\221		WARNING_TRANSCRIPT_MULTIPLE_STOP_CODONS GT:PL:DP:AD 0\2:255,0,255:34:16,18 0\2:255,0,175:22:9,13
Noirv2.chr1 12424114 . GAAAAAA GAAAAAAAA 208.0 . INDEL;IDV=17;IMF=0.435897;DP=85;VDB=0.73361;SGB=10.9211;MQSB=1;MQ0F=0;ICB=0.3;HOB=0.125;AC=1;AN=4;DP4=32,35,7,11;MQ=60;ANN=GAAAAAAAA	frameshift_variant	HIGH	Gene_Vitvi01g01011.t01	Gene_Vitvi01g01011.t01	transcript	Vitvi01g01011.t01	Coding	1\2	c.148_149insTT	p.Ser52fs	148\271	148\271	50\26		;LOF=(Gene_Vitvi01g01011.t01	Gene_Vitvi01g01011.t01	1	1.00) GT:PL:DP:AD 0\2:0,138,255:46:46,0 0\2:242,0,222:39:21,18
Noirv2.chr1 12424120 . A AAT 51.0 . INDEL;IDV=1;IMF=0.025;DP=85;VDB=0.66964;SGB=8.84268;MQSB=1;MQ0F=0;ICB=0.3;HOB=0.125;AC=1;AN=4;DP4=34,36,7,8;MQ=60;ANN=AAT	frameshift_variant	HIGH	Gene_Vitvi01g01011.t01	Gene_Vitvi01g01011.t01	transcript	Vitvi01g01011.t01	Coding	1\2	c.148_149insAT	p.Val50fs	148\271	148\271	50\26		;LOF=(Gene_Vitvi01g01011.t01	Gene_Vitvi01g01011.t01	1	1.00) GT:PL:DP:AD 0\2:0,135,255:45:45,0 0\2:85,0,243:40:25,15
Noirv2.chr1 12424246 . C T 428.0 . DP=63;VDB=0.678627;SGB=-9.32613;RPB=0.887561;MQB=1;MQSB=1;BQB=0.28276;MQ0F=0;ICB=0.5;HOB=0.5;AC=2;AN=4;DP4=19,13,13,11;MQ=60;ANN=T	stop_gained	HIGH	Gene_Vitvi01g01011.t01	Gene_Vitvi01g01011.t01	transcript	Vitvi01g01011.t01	Coding	1\2	c.23G>A	p.Trp8*	23\271	23\271	8\26		GT:PL:DP:AD 0\2:206,0,255:26:16,10 0\2:255,0,255:30:16,14
Noirv2.chr1 12520329 . A C 167.0 . DP=46;VDB=0.0249492;SGB=4.69269;RPB=0.0314783;MQB=1;MQSB=1;BQB=0.820031;MQ0F=0;ICB=0.3;HOB=0.125;AC=1;AN=4;DP4=19,13,3,6;MQ=60;ANN=C	stop_lost	HIGH	Gene_Vitvi01g01019.t01	Gene_Vitvi01g01019.t01	transcript	Vitvi01g01019.t01	Coding	3\2	c.878A>C	p.Ter293Serext*?	895\2390	878\2211	293\202		WARNING_TRANSCRIPT_MULTIPLE_STOP_CODONS,C	upstream_gene_variant	MODIFIER	Gene_Vitvi01g01020.t01	Gene_Vitvi01g01020.t01	transcript	Vitvi01g01020.t01	Coding		c.-1342A>C					1342	GT:PL:DP:AD 0\2:0,75,255:25:25,0 0\2:201,0,146:16:7,9
Noirv2.chr1 12520638 . C A 176.0 . DP=60;VDB=0.91494;SGB=5.38303;RPB=0.798619;MQB=1;MQSB=1;BQB=0.78011;MQ0F=0;ICB=0.3;HOB=0.125;AC=1;AN=4;DP4=25,18,6,4;MQ=60;ANN=A	stop_gained	HIGH	Gene_Vitvi01g01019.t01	Gene_Vitvi01g01019.t01	transcript	Vitvi01g01019.t01	Coding	3\2	c.1187C>A	p.Ser396*	1204\2390	1187\2211	396\202		WARNING_TRANSCRIPT_MULTIPLE_STOP_CODONS,A	upstream_gene_variant	MODIFIER	Gene_Vitvi01g01020.t01	Gene_Vitvi01g01020.t01	transcript	Vitvi01g01020.t01	Coding		c.-1033C>A					1033	GT:PL:DP:AD 0\2:0,93,255:31:31,0 0\2:210,0,238:22:12,10
Noirv2.chr1 12531586 . T C,A 405.0 . DP=43;VDB=0.202369;SGB=-1.31703;RPB=0.139045;MQB=0.948904;MQSB=0.889393;BQB=0.999767;MQ0F=0;ICB=0.36;HOB=0.625;AC=2,1;AN=4;DP4=1,4,13,20;MQ=58;ANN=A	stop_gained	HIGH	Gene_Vitvi01g01021.t01	Gene_Vitvi01g01021.t01	transcript	Vitvi01g01021.t01	Coding	4\2	c.489T>A	p.Tyr163*	833\2260	489\280	163\225		WARNING_TRANSCRIPT_MULTIPLE_STOP_CODONS,C	synonymous_variant	LOW	Gene_Vitvi01g01021.t01	Gene_Vitvi01g01021.t01	transcript	Vitvi01g01021.t01	Coding	4\2	c.489T>C	p.Tyr163Tyr	833\2260	489\280	163\225		WARNING_TRANSCRIPT_MULTIPLE_STOP_CODONS GT:PL:DP:AD 1\2:255,255,255,203,0,164:21:0,8,13 0\2:217,0,104,232,140,255:17:5,12,0
Noirv2.chr1 12562338 . TTGTG TTG 294.0 . INDEL;IDV=39;IMF=0.906977;DP=75;VDB=0.498044;SGB=-7.485;MQSB=1;MQ0F=0;ICB=0.5;HOB=0.5;AC=2;AN=4;DP4=37,20,9,9;MQ=60;ANN=TTG	splice_acceptor_variant&intron_variant	HIGH	Gene_Vitvi01g01024.t01	Gene_Vitvi01g01024.t01	transcript	Vitvi01g01024.t01	Coding	6\2	c.*197-2_*197-1delCA						,TTG	downstream_gene_variant	MODIFIER	Gene_Vitvi01g01023.t01	Gene_Vitvi01g01023.t01	transcript	Vitvi01g01023.t01	Coding		c.*179_*180delTG					179	;LOF=(Gene_Vitvi01g01024.t01	Gene_Vitvi01g01024.t01	1	1.00) GT:PL:DP:AD 0\2:72,0,136:43:37,6 0\2:255,0,153:32:20,12
Noirv2.chr1 12598482 . G A 35.2834 . DP=20;VDB=0.0131721;SGB=-3.78882;RPB=0.940317;MQB=0.00684241;MQSB=0.996161;BQB=0.870697;MQ0F=0;ICB=0.3;HOB=0.125;AC=1;AN=4;DP4=9,4,4,2;MQ=18;ANN=A	stop_gained	HIGH	Gene_Vitvi01g02134.t01	Gene_Vitvi01g02134.t01	transcript	Vitvi01g02134.t01	Coding	3\2	c.481C>T	p.Gln161*	482\271	481\270	161\255		WARNING_TRANSCRIPT_MULTIPLE_STOP_CODONS;LOF=(Gene_Vitvi01g02134.t01	Gene_Vitvi01g02134.t01	1	1.00);NMD=(Gene_Vitvi01g02134.t01	Gene_Vitvi01g02134.t01	1	1.00) GT:PL:DP:AD 0\2:69,0,39:9:4,5 0\2:0,10,87:10:9,1
Noirv2.chr1 12604895 . TAAAAATAAAA TAAAAATAAAAAAAAAATAAAA 3.90887 . INDEL;IDV=1;IMF=0.0222222;DP=70;VDB=0.999993;SGB=-3.15886;MQSB=0.998599;MQ0F=0;ICB=0.3;HOB=0.125;AC=1;AN=4;DP4=32,34,1,3;MQ=58;ANN=TAAAAATAAAAAAAAAATAAAA	frameshift_variant	HIGH	Gene_Vitvi01g01025.t01	Gene_Vitvi01g01025.t01	transcript	Vitvi01g01025.t01	Coding	1\2	c.148_149insTTTTATTTTTT	p.Leu53fs	148\219	148\219	50\22		,TAAAAATAAAAAAAAAATAAAA	upstream_gene_variant	MODIFIER	Gene_Vitvi01g01026.t01	Gene_Vitvi01g01026.t01	transcript	Vitvi01g01026.t01	Coding		c.-358_-357insAAAAAATAAAA					153	WARNING_TRANSCRIPT_MULTIPLE_STOP_CODONS;LOF=(Gene_Vitvi01g01025.t01	Gene_Vitvi01g01025.t01	1	1.00) GT:PL:DP:AD 0\2:37,0,244:45:42,3 0\2:0,47,255:25:24,1
Noirv2.chr1 12607694 . G A 483.0 . DP=56;VDB=0.95074;SGB=-1.38513;MQSB=1;MQ0F=0;AC=4;AN=4;DP4=0,0,23,28;MQ=60;ANN=A	stop_gained	HIGH	Gene_Vitvi01g01026.t01	Gene_Vitvi01g01026.t01	transcript	Vitvi01g01026.t01	Coding	2\2	c.1094G>A	p.Trp365*	1298\2104	1094\2433	365\276		WARNING_TRANSCRIPT_MULTIPLE_STOP_CODONS,A	upstream_gene_variant	MODIFIER	Gene_Vitvi01g01025.t01	Gene_Vitvi01g01025.t01	transcript	Vitvi01g01025.t01	Coding		c.-2641C>T					2641	GT:PL:DP:AD 1\2:255,84,0:28:0,28 1\2:255,69,0:23:0,23
Noirv2.chr1 12645426 . ACCCC ACCCCC 21.0464 . INDEL;IDV=5;IMF=0.357143;DP=49;VDB=0.173686;SGB=1.94933;MQSB=1;MQ0F=0;ICB=0.3;HOB=0.125;AC=1;AN=4;DP4=18,26,5,0;MQ=60;ANN=ACCCCC	frameshift_variant	HIGH	Gene_Vitvi01g01029.t01	Gene_Vitvi01g01029.t01	transcript	Vitvi01g01029.t01	Coding	6\2	c.254dupC	p.Ile86fs	762\2628	255\201	85\232		WARNING_TRANSCRIPT_MULTIPLE_STOP_CODONS,ACCCCC	non_coding_exon_variant	MODIFIER	Gene_Vitvi01g01029.r01	Gene_Vitvi01g01029.r01	transcript	Vitvi01g01029.r01	Noncoding	6\2	n.759dupC						,ACCCCC	non_coding_exon_variant	MODIFIER	Gene_Vitvi01g01029.r02	Gene_Vitvi01g01029.r02	transcript	Vitvi01g01029.r02	Noncoding	6\2	n.762dupC						;LOF=(Gene_Vitvi01g01029.t01	Gene_Vitvi01g01029.t01	1	1.00) GT:PL:DP:AD 0\2:0,105,249:35:35,0 0\2:55,0,121:14:9,5
Noirv2.chr1 12645877 . GAAAA GAAAAA 99.0 . INDEL;IDV=12;IMF=0.461538;DP=61;VDB=0.116027;SGB=6.76576;MQSB=0.985463;MQ0F=0;ICB=0.3;HOB=0.125;AC=1;AN=4;DP4=30,19,8,4;MQ=59;ANN=GAAAAA	frameshift_variant	HIGH	Gene_Vitvi01g01029.t01	Gene_Vitvi01g01029.t01	transcript	Vitvi01g01029.t01	Coding	7\2	c.390dupA	p.Ser131fs	898\2628	391\201	131\232		WARNING_TRANSCRIPT_MULTIPLE_STOP_CODONS,GAAAAA	non_coding_exon_variant	MODIFIER	Gene_Vitvi01g01029.r01	Gene_Vitvi01g01029.r01	transcript	Vitvi01g01029.r01	Noncoding	7\2	n.895dupA						,GAAAAA	non_coding_exon_variant	MODIFIER	Gene_Vitvi01g01029.r02	Gene_Vitvi01g01029.r02	transcript	Vitvi01g01029.r02	Noncoding	7\2	n.898dupA						GT:PL:DP:AD 0\2:0,105,244:35:35,0 0\2:133,0,143:26:14,12
Noirv2.chr1 12653712 . C T 98.0 . DP=50;VDB=0.269736;SGB=2.63044;RPB=0.133743;MQB=1;MQSB=1;BQB=0.348776;MQ0F=0;ICB=0.3;HOB=0.125;AC=1;AN=4;DP4=17,23,3,3;MQ=60;ANN=T	stop_gained	HIGH	Gene_Vitvi01g01030.t01	Gene_Vitvi01g01030.t01	transcript	Vitvi01g01030.t01	Coding	4\2	c.543G>A	p.Trp181*	657\2316	543\240	181\245		WARNING_TRANSCRIPT_MULTIPLE_STOP_CODONS GT:PL:DP:AD 0\2:132,0,255:22:16,6 0\2:0,72,255:24:24,0
Noirv2.chr1 12691774 . C T 57.0 . DP=5;VDB=0.0550934;SGB=0.908071;RPB=1;MQB=1;BQB=1;MQ0F=0;ICB=0.3;HOB=0.125;AC=3;AN=4;DP4=0,1,0,4;MQ=27;ANN=T	stop_gained	HIGH	Gene_Vitvi01g02135.t01	Gene_Vitvi01g02135.t01	transcript	Vitvi01g02135.t01	Coding	4\2	c.350G>A	p.Trp117*	351\212	350\207	117\234		WARNING_TRANSCRIPT_MULTIPLE_STOP_CODONS GT:PL:DP:AD 0\2:0,3,23:1:1,0 1\2:92,12,0:4:0,4
Noirv2.chr1 12754780 . A T 483.0 . DP=76;VDB=0.081617;SGB=-1.38136;MQSB=1;MQ0F=0;AC=4;AN=4;DP4=0,0,45,28;MQ=60;ANN=T	stop_gained	HIGH	Gene_Vitvi01g01033.t01	Gene_Vitvi01g01033.t01	transcript	Vitvi01g01033.t01	Coding	6\2	c.881T>A	p.Leu294*	882\2447	881\220	294\205		WARNING_TRANSCRIPT_MULTIPLE_STOP_CODONS GT:PL:DP:AD 1\2:255,138,0:46:0,46 1\2:255,81,0:27:0,27
Noirv2.chr1 12784023 . T A 476.0 . DP=62;VDB=0.182035;SGB=-1.36383;RPB=0.89452;MQB=1;MQSB=1;BQB=0.823292;MQ0F=0;ICB=0.3;HOB=0.125;AC=3;AN=4;DP4=8,6,29,16;MQ=60;ANN=A	stop_gained	HIGH	Gene_Vitvi01g01034.t01	Gene_Vitvi01g01034.t01	transcript	Vitvi01g01034.t01	Coding	3\2	c.599T>A	p.Leu200*	745\2295	599\2640	200\245		WARNING_TRANSCRIPT_MULTIPLE_STOP_CODONS,A	stop_gained	HIGH	Gene_Vitvi01g01034.t02	Gene_Vitvi01g01034.t02	transcript	Vitvi01g01034.t02	Coding	3\2	c.599T>A	p.Leu200*	744\2207	599\2553	200\216		WARNING_TRANSCRIPT_MULTIPLE_STOP_CODONS,A	non_coding_exon_variant	MODIFIER	Gene_Vitvi01g01034.r01	Gene_Vitvi01g01034.r01	transcript	Vitvi01g01034.r01	Noncoding	3\2	n.746T>A						,A	non_coding_exon_variant	MODIFIER	Gene_Vitvi01g01034.r02	Gene_Vitvi01g01034.r02
Noirv2.chr1 12795800 . T A 135.0 . DP=44;VDB=0.920438;SGB=4.00342;RPB=0.978461;MQB=1;MQSB=1;BQB=0.427178;MQ0F=0;ICB=0.3;HOB=0.125;AC=1;AN=4;DP4=15,16,6,2;MQ=60;ANN=A	splice_acceptor_variant&intron_variant	HIGH	Gene_Vitvi01g02136.t01	Gene_Vitvi01g02136.t01	transcript	Vitvi01g02136.t01	Coding	1\2	c.165-2A>T						,A	upstream_gene_variant	MODIFIER	Gene_Vitvi01g02137.t01	Gene_Vitvi01g02137.t01	transcript	Vitvi01g02137.t01	Coding		c.-1644T>A					1644	;LOF=(Gene_Vitvi01g02136.t01	Gene_Vitvi01g02136.t01	1	1.00) GT:PL:DP:AD 0\2:0,63,255:21:21,0 0\2:169,0,208:18:10,8
Noirv2.chr1 12796255 . A G 483.0 . DP=67;VDB=0.437119;SGB=-1.38563;MQSB=1;MQ0F=0;AC=4;AN=4;DP4=0,0,27,32;MQ=60;ANN=G	splice_donor_variant&intron_variant	HIGH	Gene_Vitvi01g02136.t01	Gene_Vitvi01g02136.t01	transcript	Vitvi01g02136.t01	Coding	1\2	c.164+2T>C						,G	upstream_gene_variant	MODIFIER	Gene_Vitvi01g02137.t01	Gene_Vitvi01g02137.t01	transcript	Vitvi01g02137.t01	Coding		c.-1189A>G					1189	;LOF=(Gene_Vitvi01g02136.t01	Gene_Vitvi01g02136.t01	1	1.00) GT:PL:DP:AD 1\2:255,99,0:33:0,33 1\2:255,78,0:26:0,26
Noirv2.chr1 12796266 . GGAGAG GGAG 427.0 . INDEL;IDV=36;IMF=0.947368;DP=68;VDB=0.420814;SGB=-16.6906;MQSB=0.978495;MQ0F=0;ICB=0.5;HOB=0.5;AC=2;AN=4;DP4=12,8,22,26;MQ=59;ANN=GGAG	frameshift_variant	HIGH	Gene_Vitvi01g02136.t01	Gene_Vitvi01g02136.t01	transcript	Vitvi01g02136.t01	Coding	1\2	c.150_151delCT	p.Pro52fs	151\297	150\222	50\273		,GGAG	upstream_gene_variant	MODIFIER	Gene_Vitvi01g02137.t01	Gene_Vitvi01g02137.t01	transcript	Vitvi01g02137.t01	Coding		c.-1174_-1173delAG					1174	;LOF=(Gene_Vitvi01g02136.t01	Gene_Vitvi01g02136.t01	1	1.00) GT:PL:DP:AD 0\2:255,0,102:38:14,24 0\2:209,0,24:30:6,24
Noirv2.chr1 12796270 . AGTG AG 24.1966 . INDEL;IDV=1;IMF=0.0333333;DP=69;VDB=0.566934;SGB=8.15014;MQSB=0.978183;MQ0F=0;ICB=0.5;HOB=0.5;AC=2;AN=4;DP4=26,29,8,6;MQ=59;ANN=AG	frameshift_variant	HIGH	Gene_Vitvi01g02136.t01	Gene_Vitvi01g02136.t01	transcript	Vitvi01g02136.t01	Coding	1\2	c.148_149delCA	p.His50fs	149\297	148\222	50\273		,AG	upstream_gene_variant	MODIFIER	Gene_Vitvi01g02137.t01	Gene_Vitvi01g02137.t01	transcript	Vitvi01g02137.t01	Coding		c.-1172_-1171delTG					1172	;LOF=(Gene_Vitvi01g02136.t01	Gene_Vitvi01g02136.t01	1	1.00) GT:PL:DP:AD 1\2:62,8,0:39:25,14 0\2:0,90,33:30:30,0
Noirv2.chr1 12796278 . G T 62.0 . DP=67;VDB=0.0354385;SGB=2.63044;RPB=0.127046;MQB=1;MQSB=1;BQB=0.695223;MQ0F=0;ICB=0.3;HOB=0.125;AC=1;AN=4;DP4=29,24,1,5;MQ=60;ANN=T	stop_gained	HIGH	Gene_Vitvi01g02136.t01	Gene_Vitvi01g02136.t01	transcript	Vitvi01g02136.t01	Coding	1\2	c.143C>A	p.Ser48*	143\297	143\222	48\273		,T	upstream_gene_variant	MODIFIER	Gene_Vitvi01g02137.t01	Gene_Vitvi01g02137.t01	transcript	Vitvi01g02137.t01	Coding		c.-1166G>T					1166	;LOF=(Gene_Vitvi01g02136.t01	Gene_Vitvi01g02136.t01	1	1.00);NMD=(Gene_Vitvi01g02136.t01	Gene_Vitvi01g02136.t01	1	1.00) GT:PL:DP:AD 0\2:0,105,255:35:35,0 0\2:97,0,255:24:18,6
Noirv2.chr1 12796364 . AT ATGACACATCATT 473.0 . INDEL;IDV=25;IMF=0.806452;DP=44;VDB=0.473794;SGB=-1.29643;MQSB=1;MQ0F=0;ICB=0.3;HOB=0.125;AC=3;AN=4;DP4=2,4,17,21;MQ=60;ANN=ATGACACATCATT	frameshift_variant&stop_gained	HIGH	Gene_Vitvi01g02136.t01	Gene_Vitvi01g02136.t01	transcript	Vitvi01g02136.t01	Coding	1\2	c.55_56insAATGATGTGTC	p.Tyr19fs	55\297	55\222	19\273		,ATGACACATCATT	upstream_gene_variant	MODIFIER	Gene_Vitvi01g02137.t01	Gene_Vitvi01g02137.t01	transcript	Vitvi01g02137.t01	Coding		c.-1079_-1078insGACACATCATT					1078	;LOF=(Gene_Vitvi01g02136.t01	Gene_Vitvi01g02136.t01	1	1.00);NMD=(Gene_Vitvi01g02136.t01	Gene_Vitvi01g02136.t01	1	1.00) GT:PL:DP:AD 0\2:255,0,54:31:6,25 1\2:255,39,0:13:0,13
Noirv2.chr1 12797475 . G A 419.0 . DP=39;VDB=0.43825;SGB=-1.36696;MQSB=1;MQ0F=0;AC=4;AN=4;DP4=0,0,1,36;MQ=60;ANN=A	stop_gained	HIGH	Gene_Vitvi01g02137.t01	Gene_Vitvi01g02137.t01	transcript	Vitvi01g02137.t01	Coding	1\2	c.32G>A	p.Trp11*	32\256	32\256	11\21		,A	upstream_gene_variant	MODIFIER	Gene_Vitvi01g02136.t01	Gene_Vitvi01g02136.t01	transcript	Vitvi01g02136.t01	Coding		c.-1055C>T					1055	,A	downstream_gene_variant	MODIFIER	Gene_Vitvi01g01035.t01	Gene_Vitvi01g01035.t01	transcript	Vitvi01g01035.t01	Coding		c.*4898C>T					4566	WARNING_TRANSCRIPT_MULTIPLE_STOP_CODONS GT:PL:DP:AD 1\2:255,66,0:22:0,22 1\2:191,45,0:15:0,15
Noirv2.chr1 12835424 . T A 324.0 . DP=54;VDB=0.264393;SGB=-12.3947;RPB=0.90289;MQB=1;MQSB=1;BQB=0.786837;MQ0F=0;ICB=0.3;HOB=0.125;AC=3;AN=4;DP4=7,11,19,15;MQ=60;ANN=A	stop_gained	HIGH	Gene_Vitvi01g01038.t01	Gene_Vitvi01g01038.t01	transcript	Vitvi01g01038.t01	Coding	3\2	c.574A>T	p.Lys192*	672\2079	574\248	192\281		WARNING_TRANSCRIPT_MULTIPLE_STOP_CODONS,A	upstream_gene_variant	MODIFIER	Gene_Vitvi01g01037.t01	Gene_Vitvi01g01037.t01	transcript	Vitvi01g01037.t01	Coding		c.-2070A>T					1933	,A	downstream_gene_variant	MODIFIER	Gene_Vitvi01g01036.t01	Gene_Vitvi01g01036.t01	transcript	Vitvi01g01036.t01	Coding		c.*5091T>A					4953	WARNING_TRANSCRIPT_MULTIPLE_STOP_CODONS GT:PL:DP:AD 1\2:255,87,0:29:0,29 0\2:103,0,255:23:18,5
Noirv2.chr1 12846346 . TAAA TAA 290.0 . INDEL;IDV=43;IMF=0.877551;DP=79;VDB=0.97977;SGB=-19.4523;MQSB=1;MQ0F=0;ICB=0.3;HOB=0.125;AC=3;AN=4;DP4=7,15,34,23;MQ=60;ANN=TAA	frameshift_variant	HIGH	Gene_Vitvi01g01039.t01	Gene_Vitvi01g01039.t01	transcript	Vitvi01g01039.t01	Coding	1\2	c.118delT	p.Phe40fs	118\286	118\286	40\21		;LOF=(Gene_Vitvi01g01039.t01	Gene_Vitvi01g01039.t01	1	1.00) GT:PL:DP:AD 1\2:187,28,0:49:5,44 0\2:137,0,176:30:17,13
Noirv2.chr1 12951657 . GAAAAAAAAA GAAAAAAAAAAA 42.1964 . INDEL;IDV=25;IMF=0.862069;DP=77;VDB=0.398985;SGB=-9.93983;MQSB=0.983256;MQ0F=0;ICB=0.3;HOB=0.125;AC=1;AN=4;DP4=29,22,12,14;MQ=59;ANN=GAAAAAAAAAAA	splice_donor_variant&intron_variant	HIGH	Gene_Vitvi01g01044.t01	Gene_Vitvi01g01044.t01	transcript	Vitvi01g01044.t01	Coding	5\25	c.915+1_915+2insTT						;LOF=(Gene_Vitvi01g01044.t01	Gene_Vitvi01g01044.t01	1	1.00) GT:PL:DP:AD 0\2:0,104,71:48:41,1 0\2:76,0,44:29:10,10
Noirv2.chr1 12966426 . G A 23.1951 . DP=29;VDB=0.11189;SGB=0.620439;RPB=0.986111;MQB=0.899632;BQB=0.986111;MQ0F=0;ICB=0.3;HOB=0.125;AC=1;AN=4;DP4=22,0,3,0;MQ=47;ANN=A	stop_gained	HIGH	Gene_Vitvi01g01047.t01	Gene_Vitvi01g01047.t01	transcript	Vitvi01g01047.t01	Coding	2\2	c.223C>T	p.Gln75*	223\222	223\222	75\273		,A	upstream_gene_variant	MODIFIER	Gene_Vitvi01g01045.t01	Gene_Vitvi01g01045.t01	transcript	Vitvi01g01045.t01	Coding		c.-3789C>T					3789	,A	upstream_gene_variant	MODIFIER	Gene_Vitvi01g01046.t01	Gene_Vitvi01g01046.t01	transcript	Vitvi01g01046.t01	Coding		c.-1855C>T					1855	;LOF=(Gene_Vitvi01g01047.t01	Gene_Vitvi01g01047.t01	1	1.00);NMD=(Gene_Vitvi01g01047.t01	Gene_Vitvi01g01047.t01
Noirv2.chr1 12966438 . T A 74.0 . DP=24;VDB=0.374631;SGB=1.94933;RPB=0.872746;MQB=0.67032;BQB=0.837128;MQ0F=0;ICB=0.3;HOB=0.125;AC=1;AN=4;DP4=18,0,5,0;MQ=47;ANN=A	splice_acceptor_variant&intron_variant	HIGH	Gene_Vitvi01g01047.t01	Gene_Vitvi01g01047.t01	transcript	Vitvi01g01047.t01	Coding	1\2	c.213-2A>T						,A	upstream_gene_variant	MODIFIER	Gene_Vitvi01g01045.t01	Gene_Vitvi01g01045.t01	transcript	Vitvi01g01045.t01	Coding		c.-3801A>T					3801	,A	upstream_gene_variant	MODIFIER	Gene_Vitvi01g01046.t01	Gene_Vitvi01g01046.t01	transcript	Vitvi01g01046.t01	Coding		c.-1867A>T					1867	;LOF=(Gene_Vitvi01g01047.t01	Gene_Vitvi01g01047.t01	1	1.00) GT:PL:DP:AD 0\2:0,36,188:12:12,0 0\2:108,0,115:11:6,5
Noirv2.chr1 12966516 . A G 476.0 . DP=40;VDB=0.025309;SGB=-1.37482;MQSB=0.841258;MQ0F=0;AC=4;AN=4;DP4=0,0,30,4;MQ=55;ANN=G	splice_donor_variant&intron_variant	HIGH	Gene_Vitvi01g01047.t01	Gene_Vitvi01g01047.t01	transcript	Vitvi01g01047.t01	Coding	1\2	c.212+2T>C						,G	upstream_gene_variant	MODIFIER	Gene_Vitvi01g01045.t01	Gene_Vitvi01g01045.t01	transcript	Vitvi01g01045.t01	Coding		c.-3879T>C					3879	,G	upstream_gene_variant	MODIFIER	Gene_Vitvi01g01046.t01	Gene_Vitvi01g01046.t01	transcript	Vitvi01g01046.t01	Coding		c.-1945T>C					1945	;LOF=(Gene_Vitvi01g01047.t01	Gene_Vitvi01g01047.t01	1	1.00) GT:PL:DP:AD 1\2:255,57,0:19:0,19 1\2:248,45,0:15:0,15
Noirv2.chr1 12966517 . T A 478.0 . DP=40;VDB=0.026401;SGB=-1.37482;MQSB=0.841258;MQ0F=0;AC=4;AN=4;DP4=0,0,30,4;MQ=55;ANN=A	splice_donor_variant&intron_variant	HIGH	Gene_Vitvi01g01047.t01	Gene_Vitvi01g01047.t01	transcript	Vitvi01g01047.t01	Coding	1\2	c.212+1A>T						,A	upstream_gene_variant	MODIFIER	Gene_Vitvi01g01045.t01	Gene_Vitvi01g01045.t01	transcript	Vitvi01g01045.t01	Coding		c.-3880A>T					3880	,A	upstream_gene_variant	MODIFIER	Gene_Vitvi01g01046.t01	Gene_Vitvi01g01046.t01	transcript	Vitvi01g01046.t01	Coding		c.-1946A>T					1946	;LOF=(Gene_Vitvi01g01047.t01	Gene_Vitvi01g01047.t01	1	1.00) GT:PL:DP:AD 1\2:255,57,0:19:0,19 1\2:250,45,0:15:0,15
Noirv2.chr1 13118098 . TTTTTTAGGT TT 67.0 . INDEL;IDV=9;IMF=0.6;DP=25;VDB=0.801171;SGB=4.69269;MQSB=0.385998;MQ0F=0;ICB=0.3;HOB=0.125;AC=1;AN=4;DP4=13,3,9,0;MQ=24;ANN=TT	frameshift_variant&splice_acceptor_variant&splice_region_variant&intron_variant	HIGH	Gene_Vitvi01g01054.t01	Gene_Vitvi01g01054.t01	transcript	Vitvi01g01054.t01	Coding	3\2	c.189-6_190delTTTTAGGT	p.Trp64fs		189\250	63\215		WARNING_TRANSCRIPT_MULTIPLE_STOP_CODONS,TT	frameshift_variant&splice_acceptor_variant&splice_region_variant&intron_variant	HIGH	Gene_Vitvi01g01054.t02	Gene_Vitvi01g01054.t02	transcript	Vitvi01g01054.t02	Coding	2\2	c.51-6_52delTTTTAGGT	p.Trp18fs		51\212	17\269		WARNING_TRANSCRIPT_MULTIPLE_STOP_CODONS;LOF=(Gene_Vitvi01g01054.t01	Gene_Vitvi01g01054.t01	1	1.00),(Gene_Vitvi01g01054.t02	Gene_Vitvi01g01054.t02	1	1.00) GT:PL:DP:AD 0\2:0,30,149:10:10,0 0\2:101,0,66:15:6,9
Noirv2.chr1 13123125 . GTCT GTCTCT 80.0 . INDEL;IDV=7;IMF=0.25;DP=51;VDB=0.50381;SGB=-5.95067;MQSB=0.77551;MQ0F=0;ICB=0.5;HOB=0.5;AC=2;AN=4;DP4=36,2,13,0;MQ=33;ANN=GTCTCT	frameshift_variant	HIGH	Gene_Vitvi01g01054.t01	Gene_Vitvi01g01054.t01	transcript	Vitvi01g01054.t01	Coding	8\2	c.893_894dupCT	p.Tyr299fs	1173\2228	895\250	299\215		WARNING_TRANSCRIPT_MULTIPLE_STOP_CODONS,GTCTCT	frameshift_variant	HIGH	Gene_Vitvi01g01054.t02	Gene_Vitvi01g01054.t02	transcript	Vitvi01g01054.t02	Coding	7\2	c.755_756dupCT	p.Tyr253fs	758\213	757\212	253\269		WARNING_TRANSCRIPT_MULTIPLE_STOP_CODONS,GTCTCT	upstream_gene_variant	MODIFIER	Gene_Vitvi01g02138.t01	Gene_Vitvi01g02138.t01	transcript	Vitvi01g02138.t01	Coding		c.-3098_-3097dupCT					3036	;LOF=(Gene_Vitvi01g01054.t01	Gene_Vitvi01g01054.t01	1	1.00),(Gene_Vitvi01g01054.t02	Gene_Vitvi01g01054.t02
Noirv2.chr1 13123944 . TGG TGGG 197.0 . INDEL;IDV=30;IMF=0.410959;DP=112;VDB=0.00536162;SGB=18.5451;MQSB=2.91249e-06;MQ0F=0;ICB=0.3;HOB=0.125;AC=1;AN=4;DP4=3,80,20,9;MQ=41;ANN=TGGG	frameshift_variant	HIGH	Gene_Vitvi01g01054.t01	Gene_Vitvi01g01054.t01	transcript	Vitvi01g01054.t01	Coding	9\2	c.940dupG	p.Val314fs	1219\2228	941\250	314\215		WARNING_TRANSCRIPT_MULTIPLE_STOP_CODONS,TGGG	frameshift_variant	HIGH	Gene_Vitvi01g01054.t02	Gene_Vitvi01g01054.t02	transcript	Vitvi01g01054.t02	Coding	8\2	c.802dupG	p.Val268fs	804\213	803\212	268\269		WARNING_TRANSCRIPT_MULTIPLE_STOP_CODONS,TGGG	upstream_gene_variant	MODIFIER	Gene_Vitvi01g02138.t01	Gene_Vitvi01g02138.t01	transcript	Vitvi01g02138.t01	Coding		c.-2279dupG					2218	GT:PL:DP:AD 0\2:231,0,171:73:44,29 0\2:0,117,178:39:39,0
Noirv2.chr1 13126227 . G A 43.1726 . DP=31;VDB=0.548401;SGB=1.94933;RPB=0.297026;MQB=0.986161;MQSB=0.924606;BQB=0.521675;MQ0F=0;ICB=0.3;HOB=0.125;AC=1;AN=4;DP4=17,8,3,2;MQ=23;ANN=A	start_lost	HIGH	Gene_Vitvi01g02138.t01	Gene_Vitvi01g02138.t01	transcript	Vitvi01g02138.t01	Coding	1\2	c.3G>A	p.Met1?	63\206	3\216	1\21		,A	downstream_gene_variant	MODIFIER	Gene_Vitvi01g01054.t01	Gene_Vitvi01g01054.t01	transcript	Vitvi01g01054.t01	Coding		c.*2271G>A					2271	WARNING_TRANSCRIPT_MULTIPLE_STOP_CODONS,A	downstream_gene_variant	MODIFIER	Gene_Vitvi01g01054.t02	Gene_Vitvi01g01054.t02	transcript	Vitvi01g01054.t02	Coding		c.*2271G>A					2271	WARNING_TRANSCRIPT_MULTIPLE_STOP_CODONS;LOF=(Gene_Vitvi01g02138.t01	Gene_Vitvi01g02138.t01	1	1.00) GT:PL:DP:AD 0\2:0,54,215:18:18,0 0\2:77,0,99:12:7,5
Noirv2.chr1 13126438 . T A 45.953 . DP=178;VDB=0.00201658;SGB=8.15014;RPB=0.51835;MQB=0.156823;MQSB=0.0505063;BQB=0.992159;MQ0F=0;ICB=0.3;HOB=0.125;AC=1;AN=4;DP4=95,60,5,9;MQ=29;ANN=A	stop_gained	HIGH	Gene_Vitvi01g02138.t01	Gene_Vitvi01g02138.t01	transcript	Vitvi01g02138.t01	Coding	2\2	c.47T>A	p.Leu16*	107\206	47\216	16\21		,A	downstream_gene_variant	MODIFIER	Gene_Vitvi01g01054.t01	Gene_Vitvi01g01054.t01	transcript	Vitvi01g01054.t01	Coding		c.*2482T>A					2482	WARNING_TRANSCRIPT_MULTIPLE_STOP_CODONS,A	downstream_gene_variant	MODIFIER	Gene_Vitvi01g01054.t02	Gene_Vitvi01g01054.t02	transcript	Vitvi01g01054.t02	Coding		c.*2482T>A					2482	WARNING_TRANSCRIPT_MULTIPLE_STOP_CODONS GT:PL:DP:AD 0\2:0,255,255:111:111,0 0\2:81,0,255:58:44,14
Noirv2.chr1 13126665 . CCA CCACA 221.0 . INDEL;IDV=42;IMF=0.42;DP=156;VDB=0.00893168;SGB=-16.6906;MQSB=0.107275;MQ0F=0;ICB=0.3;HOB=0.125;AC=1;AN=4;DP4=50,58,20,28;MQ=32;ANN=CCACA	frameshift_variant	HIGH	Gene_Vitvi01g02138.t01	Gene_Vitvi01g02138.t01	transcript	Vitvi01g02138.t01	Coding	3\2	c.193_194dupCA	p.Thr66fs	255\206	195\216	65\21		,CCACA	downstream_gene_variant	MODIFIER	Gene_Vitvi01g01054.t01	Gene_Vitvi01g01054.t01	transcript	Vitvi01g01054.t01	Coding		c.*2710_*2711dupCA					2712	WARNING_TRANSCRIPT_MULTIPLE_STOP_CODONS,CCACA	downstream_gene_variant	MODIFIER	Gene_Vitvi01g01054.t02	Gene_Vitvi01g01054.t02	transcript	Vitvi01g01054.t02	Coding		c.*2710_*2711dupCA					2712	WARNING_TRANSCRIPT_MULTIPLE_STOP_CODONS;LOF=(Gene_Vitvi01g02138.t01	Gene_Vitvi01g02138.t01	1	1.00) GT:PL:DP:AD 0\2:255,0,255:100:57,43 0\2:0,90,255:56:51,5
Noirv2.chr1 13126666 . CATA CATATA 84.0 . INDEL;IDV=1;IMF=0.00970874;DP=160;VDB=0.0331685;SGB=23.3971;MQSB=0.113056;MQ0F=0;ICB=0.3;HOB=0.125;AC=1;AN=4;DP4=58,66,15,21;MQ=32;ANN=CATATA	frameshift_variant	HIGH	Gene_Vitvi01g02138.t01	Gene_Vitvi01g02138.t01	transcript	Vitvi01g02138.t01	Coding	3\2	c.195_196dupTA	p.Thr66fs	257\206	197\216	66\21		,CATATA	downstream_gene_variant	MODIFIER	Gene_Vitvi01g01054.t01	Gene_Vitvi01g01054.t01	transcript	Vitvi01g01054.t01	Coding		c.*2712_*2713dupTA					2714	WARNING_TRANSCRIPT_MULTIPLE_STOP_CODONS,CATATA	downstream_gene_variant	MODIFIER	Gene_Vitvi01g01054.t02	Gene_Vitvi01g01054.t02	transcript	Vitvi01g01054.t02	Coding		c.*2712_*2713dupTA					2714	WARNING_TRANSCRIPT_MULTIPLE_STOP_CODONS;LOF=(Gene_Vitvi01g02138.t01	Gene_Vitvi01g02138.t01	1	1.00) GT:PL:DP:AD 0\2:118,0,255:103:67,36 0\2:0,172,255:57:57,0
Noirv2.chr1 13223543 . A T 182.0 . DP=68;VDB=0.393;SGB=6.76576;RPB=0.45198;MQB=1;MQSB=1;BQB=0.258321;MQ0F=0;ICB=0.3;HOB=0.125;AC=1;AN=4;DP4=30,21,8,4;MQ=60;ANN=T	stop_gained	HIGH	Gene_Vitvi01g01057.t01	Gene_Vitvi01g01057.t01	transcript	Vitvi01g01057.t01	Coding	6\2	c.922A>T	p.Arg308*	1606\2423	922\2514	308\203		WARNING_TRANSCRIPT_MULTIPLE_STOP_CODONS,T	downstream_gene_variant	MODIFIER	Gene_Vitvi01g01058.t01	Gene_Vitvi01g01058.t01	transcript	Vitvi01g01058.t01	Coding		c.*1917T>A					1562	;LOF=(Gene_Vitvi01g01057.t01	Gene_Vitvi01g01057.t01	1	1.00);NMD=(Gene_Vitvi01g01057.t01	Gene_Vitvi01g01057.t01	1	1.00) GT:PL:DP:AD 0\2:0,108,255:36:36,0 0\2:216,0,255:27:15,12
Noirv2.chr1 13258589 . G T 221.0 . DP=55;VDB=0.450899;SGB=10.2282;RPB=0.954586;MQB=1;MQSB=1;BQB=0.999955;MQ0F=0;ICB=0.3;HOB=0.125;AC=1;AN=4;DP4=19,17,7,10;MQ=60;ANN=T	stop_gained	HIGH	Gene_Vitvi01g01061.t01	Gene_Vitvi01g01061.t01	transcript	Vitvi01g01061.t01	Coding	2\23	c.661G>T	p.Glu221*	664\2385	661\2382	221\293		,T	downstream_gene_variant	MODIFIER	Gene_Vitvi01g02139.t01	Gene_Vitvi01g02139.t01	transcript	Vitvi01g02139.t01	Coding		c.*5154C>A					4891	;LOF=(Gene_Vitvi01g01061.t01	Gene_Vitvi01g01061.t01	1	1.00);NMD=(Gene_Vitvi01g01061.t01	Gene_Vitvi01g01061.t01	1	1.00) GT:PL:DP:AD 0\2:255,0,255:34:17,17 0\2:0,57,255:19:19,0
Noirv2.chr1 13259205 . TCGTTGTTGCAG T 221.0 . INDEL;IDV=7;IMF=0.291667;DP=65;VDB=0.481568;SGB=3.31571;MQSB=1;MQ0F=0;ICB=0.3;HOB=0.125;AC=1;AN=4;DP4=34,24,4,3;MQ=60;ANN=T	splice_acceptor_variant&splice_region_variant&intron_variant	HIGH	Gene_Vitvi01g01061.t01	Gene_Vitvi01g01061.t01	transcript	Vitvi01g01061.t01	Coding	3\22	c.985-11_985-1delCGTTGTTGCAG						,T	downstream_gene_variant	MODIFIER	Gene_Vitvi01g02139.t01	Gene_Vitvi01g02139.t01	transcript	Vitvi01g02139.t01	Coding		c.*4527_*4537delCTGCAACAACG					4274	;LOF=(Gene_Vitvi01g01061.t01	Gene_Vitvi01g01061.t01	1	1.00) GT:PL:DP:AD 0\2:0,123,255:41:41,0 0\2:255,0,255:24:17,7
Noirv2.chr1 13260848 . TGCACC T 221.0 . INDEL;IDV=8;IMF=0.363636;DP=51;VDB=0.397653;SGB=4.00342;MQSB=0.956273;MQ0F=0;ICB=0.3;HOB=0.125;AC=1;AN=4;DP4=26,17,5,3;MQ=59;ANN=T	frameshift_variant	HIGH	Gene_Vitvi01g01061.t01	Gene_Vitvi01g01061.t01	transcript	Vitvi01g01061.t01	Coding	8\23	c.1657_1661delGCACC	p.Ala553fs	1660\2385	1657\2382	553\293		,T	downstream_gene_variant	MODIFIER	Gene_Vitvi01g02139.t01	Gene_Vitvi01g02139.t01	transcript	Vitvi01g02139.t01	Coding		c.*2890_*2894delGGTGC					2631	;LOF=(Gene_Vitvi01g01061.t01	Gene_Vitvi01g01061.t01	1	1.00) GT:PL:DP:AD 0\2:0,87,255:29:29,0 0\2:255,0,255:22:14,8
Noirv2.chr1 13284768 . A T 483.0 . DP=75;VDB=0.645411;SGB=-1.38617;MQSB=1;MQ0F=0;AC=4;AN=4;DP4=0,0,46,26;MQ=60;ANN=T	stop_gained	HIGH	Gene_Vitvi01g01062.t01	Gene_Vitvi01g01062.t01	transcript	Vitvi01g01062.t01	Coding	1\2	c.160A>T	p.Lys54*	160\272	160\272	54\223		;LOF=(Gene_Vitvi01g01062.t01	Gene_Vitvi01g01062.t01	1	1.00);NMD=(Gene_Vitvi01g01062.t01	Gene_Vitvi01g01062.t01	1	1.00) GT:PL:DP:AD 1\2:255,120,0:40:0,40 1\2:255,96,0:32:0,32
Noirv2.chr1 13286660 . AT A 53.0 . INDEL;IDV=15;IMF=0.555556;DP=66;VDB=0.994495;SGB=7.4578;MQSB=0.771433;MQ0F=0;ICB=0.3;HOB=0.125;AC=1;AN=4;DP4=33,20,8,5;MQ=57;ANN=A	frameshift_variant	HIGH	Gene_Vitvi01g01062.t01	Gene_Vitvi01g01062.t01	transcript	Vitvi01g01062.t01	Coding	4\2	c.674delT	p.Ile225fs	674\272	674\272	225\223		;LOF=(Gene_Vitvi01g01062.t01	Gene_Vitvi01g01062.t01	1	1.00) GT:PL:DP:AD 0\2:0,117,255:39:39,0 0\2:87,0,229:27:14,13
Noirv2.chr1 13286806 . A G 47.0727 . DP=66;VDB=0.693794;SGB=-5.64284;RPB=0.974444;MQB=6.62823e-06;MQSB=0.0600318;BQB=0.356998;MQ0F=0;ICB=0.3;HOB=0.125;AC=1;AN=4;DP4=19,32,10,2;MQ=53;ANN=G	splice_acceptor_variant&intron_variant	HIGH	Gene_Vitvi01g01062.t01	Gene_Vitvi01g01062.t01	transcript	Vitvi01g01062.t01	Coding	4\2	c.779-2A>G						;LOF=(Gene_Vitvi01g01062.t01	Gene_Vitvi01g01062.t01	1	1.00) GT:PL:DP:AD 0\2:82,0,255:41:31,10 0\2:0,28,255:22:20,2
Noirv2.chr1 13286822 . A T 63.0 . DP=70;VDB=0.778717;SGB=-5.94997;RPB=0.650147;MQB=2.16252e-06;MQSB=0.0518584;BQB=0.921075;MQ0F=0;ICB=0.3;HOB=0.125;AC=1;AN=4;DP4=21,34,11,2;MQ=54;ANN=T	stop_gained	HIGH	Gene_Vitvi01g01062.t01	Gene_Vitvi01g01062.t01	transcript	Vitvi01g01062.t01	Coding	5\2	c.793A>T	p.Arg265*	793\272	793\272	265\223		GT:PL:DP:AD 0\2:98,0,255:43:32,11 0\2:0,27,255:25:23,2
Noirv2.chr1 13303422 . G A 135.0 . DP=9;VDB=0.29154;SGB=3.16415;RPB=1;MQB=1;MQSB=0.243649;BQB=1;MQ0F=0;ICB=0.3;HOB=0.125;AC=3;AN=4;DP4=0,1,4,4;MQ=35;ANN=A	splice_donor_variant&intron_variant	HIGH	Gene_Vitvi01g01063.t01	Gene_Vitvi01g01063.t01	transcript	Vitvi01g01063.t01	Coding	4\2	c.99+1G>A						,A	upstream_gene_variant	MODIFIER	Gene_Vitvi01g01066.t01	Gene_Vitvi01g01066.t01	transcript	Vitvi01g01066.t01	Coding		c.-2640G>A					2640	,A	downstream_gene_variant	MODIFIER	Gene_Vitvi01g01064.t01	Gene_Vitvi01g01064.t01	transcript	Vitvi01g01064.t01	Coding		c.*1400C>T					1400	,A	downstream_gene_variant	MODIFIER	Gene_Vitvi01g01065.t01	Gene_Vitvi01g01065.t01
Noirv2.chr1 13304285 . C G 15.8702 . DP=4;VDB=0.02;SGB=0.00473136;RPB=1;MQB=1;MQSB=1;BQB=0;MQ0F=0;ICB=0.3;HOB=0.125;AC=1;AN=4;DP4=1,1,2,0;MQ=29;ANN=G	splice_donor_variant&intron_variant	HIGH	Gene_Vitvi01g01063.t01	Gene_Vitvi01g01063.t01	transcript	Vitvi01g01063.t01	Coding	5\2	c.104+2C>G						,G	upstream_gene_variant	MODIFIER	Gene_Vitvi01g01066.t01	Gene_Vitvi01g01066.t01	transcript	Vitvi01g01066.t01	Coding		c.-1777C>G					1777	,G	downstream_gene_variant	MODIFIER	Gene_Vitvi01g01064.t01	Gene_Vitvi01g01064.t01	transcript	Vitvi01g01064.t01	Coding		c.*537G>C					537	,G	downstream_gene_variant	MODIFIER	Gene_Vitvi01g01065.t01	Gene_Vitvi01g01065.t01
Noirv2.chr1 13304824 . A G 36.0479 . DP=3;VDB=0.807564;SGB=0.461295;MQ0F=0;AC=2;AN=2;DP4=0,0,3,0;MQ=29;ANN=G	stop_lost&splice_region_variant	HIGH	Gene_Vitvi01g01064.t01	Gene_Vitvi01g01064.t01	transcript	Vitvi01g01064.t01	Coding	1\2	c.160T>C	p.Ter54Argext*?	160\262	160\262	54\23		,G	upstream_gene_variant	MODIFIER	Gene_Vitvi01g01066.t01	Gene_Vitvi01g01066.t01	transcript	Vitvi01g01066.t01	Coding		c.-1238A>G					1238	,G	downstream_gene_variant	MODIFIER	Gene_Vitvi01g01063.t01	Gene_Vitvi01g01063.t01	transcript	Vitvi01g01063.t01	Coding		c.*114A>G					114	,G	downstream_gene_variant	MODIFIER	Gene_Vitvi01g01065.t01	Gene_Vitvi01g01065.t01
Noirv2.chr1 13314547 . C A 56.0 . DP=5;VDB=0.176409;SGB=-0.826713;RPB=1;MQB=1;MQSB=1;BQB=1;MQ0F=0;ICB=0.3;HOB=0.125;AC=3;AN=4;DP4=0,1,4,0;MQ=34;ANN=A	splice_acceptor_variant&intron_variant	HIGH	Gene_Vitvi01g01066.t01	Gene_Vitvi01g01066.t01	transcript	Vitvi01g01066.t01	Coding	2\2	c.13-1C>A						;LOF=(Gene_Vitvi01g01066.t01	Gene_Vitvi01g01066.t01	1	1.00) GT:PL:DP:AD 0\2:64,0,15:4:1,3 1\2:25,3,0:1:0,1
Noirv2.chr1 13326075 . A G 4.12149 . DP=14;VDB=0.52;SGB=0.00473136;RPB=0.590909;MQB=0.727273;MQSB=1;BQB=0.590909;MQ0F=0;ICB=0.3;HOB=0.125;AC=1;AN=4;DP4=10,1,2,0;MQ=33;ANN=G	splice_acceptor_variant&intron_variant	HIGH	Gene_Vitvi01g01066.t01	Gene_Vitvi01g01066.t01	transcript	Vitvi01g01066.t01	Coding	4\2	c.43-2A>G						;LOF=(Gene_Vitvi01g01066.t01	Gene_Vitvi01g01066.t01	1	1.00) GT:PL:DP:AD 0\2:0,30,178:10:10,0 0\2:36,0,12:3:1,2
Noirv2.chr1 13341871 . T G 94.0 . DP=76;VDB=0.288901;SGB=-6.25731;RPB=0.573214;MQB=0.915922;MQSB=9.94792e-05;BQB=0.703776;MQ0F=0;ICB=0.3;HOB=0.125;AC=1;AN=4;DP4=27,30,5,9;MQ=38;ANN=G	splice_donor_variant&intron_variant	HIGH	Gene_Vitvi01g01067.t01	Gene_Vitvi01g01067.t01	transcript	Vitvi01g01067.t01	Coding	5\2	c.203+2T>G						,G	upstream_gene_variant	MODIFIER	Gene_Vitvi01g01068.t01	Gene_Vitvi01g01068.t01	transcript	Vitvi01g01068.t01	Coding		c.-3794T>G					3794	;LOF=(Gene_Vitvi01g01067.t01	Gene_Vitvi01g01067.t01	1	1.00) GT:PL:DP:AD 0\2:128,0,255:38:27,11 0\2:0,26,255:33:30,3
Noirv2.chr1 13342158 . A G 44.1257 . DP=31;VDB=0.012598;SGB=2.63044;RPB=0.955997;MQB=0.992218;MQSB=0.942315;BQB=0.882497;MQ0F=0;ICB=0.3;HOB=0.125;AC=1;AN=4;DP4=7,18,5,1;MQ=27;ANN=G	splice_acceptor_variant&intron_variant	HIGH	Gene_Vitvi01g01067.t01	Gene_Vitvi01g01067.t01	transcript	Vitvi01g01067.t01	Coding	6\2	c.221-2A>G						,G	upstream_gene_variant	MODIFIER	Gene_Vitvi01g01068.t01	Gene_Vitvi01g01068.t01	transcript	Vitvi01g01068.t01	Coding		c.-3507A>G					3507	;LOF=(Gene_Vitvi01g01067.t01	Gene_Vitvi01g01067.t01	1	1.00) GT:PL:DP:AD 0\2:78,0,131:16:10,6 0\2:0,45,245:15:15,0
Noirv2.chr1 13342159 . G T 346.0 . DP=31;VDB=0.00127709;SGB=-1.36128;RPB=0.521765;MQB=0.134048;MQSB=0.994415;BQB=0.806016;MQ0F=0;ICB=0.3;HOB=0.125;AC=3;AN=4;DP4=1,2,11,16;MQ=27;ANN=T	splice_acceptor_variant&intron_variant	HIGH	Gene_Vitvi01g01067.t01	Gene_Vitvi01g01067.t01	transcript	Vitvi01g01067.t01	Coding	6\2	c.221-1G>T						,T	upstream_gene_variant	MODIFIER	Gene_Vitvi01g01068.t01	Gene_Vitvi01g01068.t01	transcript	Vitvi01g01068.t01	Coding		c.-3506G>T					3506	;LOF=(Gene_Vitvi01g01067.t01	Gene_Vitvi01g01067.t01	1	1.00) GT:PL:DP:AD 0\2:148,0,43:15:3,12 1\2:233,45,0:15:0,15
Noirv2.chr1 13342188 . G A 207.0 . DP=35;VDB=0.801303;SGB=-8.71242;RPB=0.203707;MQB=0.353822;MQSB=0.535783;BQB=0.493051;MQ0F=0;ICB=0.5;HOB=0.5;AC=2;AN=4;DP4=8,4,4,18;MQ=26;ANN=A	splice_donor_variant&intron_variant	HIGH	Gene_Vitvi01g01067.t01	Gene_Vitvi01g01067.t01	transcript	Vitvi01g01067.t01	Coding	7\2	c.248+1G>A						,A	upstream_gene_variant	MODIFIER	Gene_Vitvi01g01068.t01	Gene_Vitvi01g01068.t01	transcript	Vitvi01g01068.t01	Coding		c.-3477G>A					3477	;LOF=(Gene_Vitvi01g01067.t01	Gene_Vitvi01g01067.t01	1	1.00) GT:PL:DP:AD 0\2:96,0,129:21:9,12 0\2:145,0,35:13:3,9
Noirv2.chr1 13342457 . A T 20.3196 . DP=22;VDB=0.184775;SGB=1.27626;RPB=0.696556;MQB=0.751477;MQSB=0.388889;BQB=0.275222;MQ0F=0;ICB=0.3;HOB=0.125;AC=1;AN=4;DP4=2,14,0,4;MQ=31;ANN=T	splice_acceptor_variant&intron_variant	HIGH	Gene_Vitvi01g01067.t01	Gene_Vitvi01g01067.t01	transcript	Vitvi01g01067.t01	Coding	7\2	c.249-2A>T						,T	upstream_gene_variant	MODIFIER	Gene_Vitvi01g01068.t01	Gene_Vitvi01g01068.t01	transcript	Vitvi01g01068.t01	Coding		c.-3208A>T					3208	;LOF=(Gene_Vitvi01g01067.t01	Gene_Vitvi01g01067.t01	1	1.00) GT:PL:DP:AD 0\2:0,39,215:13:13,0 0\2:54,0,51:7:3,4
Noirv2.chr1 13345666 . T G 36.2108 . DP=20;VDB=0.0481132;SGB=0.620439;RPB=0.760518;MQB=0.368713;BQB=0.721955;MQ0F=0;ICB=0.3;HOB=0.125;AC=1;AN=4;DP4=13,0,3,0;MQ=31;ANN=G	start_lost	HIGH	Gene_Vitvi01g01068.t01	Gene_Vitvi01g01068.t01	transcript	Vitvi01g01068.t01	Coding	1\2	c.2T>G	p.Met1?	2\207	2\207	1\28		,G	downstream_gene_variant	MODIFIER	Gene_Vitvi01g01067.t01	Gene_Vitvi01g01067.t01	transcript	Vitvi01g01067.t01	Coding		c.*548T>G					548	;LOF=(Gene_Vitvi01g01068.t01	Gene_Vitvi01g01068.t01	1	1.00) GT:PL:DP:AD 0\2:0,30,159:10:10,0 0\2:70,0,44:6:3,3
Noirv2.chr1 13346392 . T C,G 57.0 . DP=19;VDB=0.018787;SGB=-4.10598;RPB=0.295511;MQB=0.0509867;MQSB=0.880748;BQB=0.995249;MQ0F=0;ICB=0.5;HOB=0.5;AC=1,1;AN=4;DP4=7,3,7,0;MQ=28;ANN=C	splice_donor_variant&intron_variant	HIGH	Gene_Vitvi01g01068.t01	Gene_Vitvi01g01068.t01	transcript	Vitvi01g01068.t01	Coding	3\2	c.26+2T>C						,G	splice_donor_variant&intron_variant	HIGH	Gene_Vitvi01g01068.t01	Gene_Vitvi01g01068.t01	transcript	Vitvi01g01068.t01	Coding	3\2	c.26+2T>G						,C	downstream_gene_variant	MODIFIER	Gene_Vitvi01g01067.t01	Gene_Vitvi01g01067.t01	transcript	Vitvi01g01067.t01	Coding		c.*1274T>C					1274	,G	downstream_gene_variant	MODIFIER	Gene_Vitvi01g01067.t01	Gene_Vitvi01g01067.t01
Noirv2.chr1 13347265 . C T 3.03792 . DP=1;SGB=-0.157211;MQ0F=0;AC=2;AN=2;DP4=0,0,1,0;MQ=27;ANN=T	stop_gained	HIGH	Gene_Vitvi01g01068.t01	Gene_Vitvi01g01068.t01	transcript	Vitvi01g01068.t01	Coding	7\2	c.100C>T	p.Gln34*	100\207	100\207	34\28		,T	downstream_gene_variant	MODIFIER	Gene_Vitvi01g01067.t01	Gene_Vitvi01g01067.t01	transcript	Vitvi01g01067.t01	Coding		c.*2147C>T					2147	GT:PL:DP:AD 1\2:27,3,0:1:0,1 ./.:0,0,0:0:0,0
Noirv2.chr1 13380168 . A C 483.0 . DP=60;VDB=0.183679;SGB=-1.38595;MQSB=1;MQ0F=0;AC=4;AN=4;DP4=0,0,33,22;MQ=60;ANN=C	stop_lost	HIGH	Gene_Vitvi01g01071.t01	Gene_Vitvi01g01071.t01	transcript	Vitvi01g01071.t01	Coding	1\23	c.36A>C	p.Ter12Cysext*?	37\2628	36\2408	12\201		WARNING_TRANSCRIPT_MULTIPLE_STOP_CODONS GT:PL:DP:AD 1\2:255,78,0:26:0,26 1\2:255,87,0:29:0,29
Noirv2.chr1 13380654 . G A 181.0 . DP=52;VDB=0.366224;SGB=5.38303;RPB=0.873855;MQB=1;MQSB=1;BQB=0.913218;MQ0F=0;ICB=0.3;HOB=0.125;AC=1;AN=4;DP4=19,17,5,5;MQ=60;ANN=A	stop_gained	HIGH	Gene_Vitvi01g01071.t01	Gene_Vitvi01g01071.t01	transcript	Vitvi01g01071.t01	Coding	1\23	c.522G>A	p.Trp174*	523\2628	522\2408	174\201		WARNING_TRANSCRIPT_MULTIPLE_STOP_CODONS;LOF=(Gene_Vitvi01g01071.t01	Gene_Vitvi01g01071.t01	1	1.00);NMD=(Gene_Vitvi01g01071.t01	Gene_Vitvi01g01071.t01	1	1.00) GT:PL:DP:AD 0\2:0,78,255:26:26,0 0\2:215,0,208:20:10,10
Noirv2.chr1 13382808 . TCCC TCC 402.0 . INDEL;IDV=33;IMF=0.942857;DP=71;VDB=0.999879;SGB=-15.77;MQSB=1;MQ0F=0;ICB=0.3;HOB=0.125;AC=3;AN=4;DP4=13,13,26,19;MQ=60;ANN=TCC	frameshift_variant	HIGH	Gene_Vitvi01g01071.t01	Gene_Vitvi01g01071.t01	transcript	Vitvi01g01071.t01	Coding	6\23	c.1322delC	p.Pro441fs	1323\2628	1322\2408	441\201		WARNING_TRANSCRIPT_MULTIPLE_STOP_CODONS;LOF=(Gene_Vitvi01g01071.t01	Gene_Vitvi01g01071.t01	1	1.00) GT:PL:DP:AD 0\2:186,0,244:36:23,13 1\2:250,29,0:35:3,32
Noirv2.chr1 13382811 . CT C 220.0 . INDEL;IDV=17;IMF=0.472222;DP=70;VDB=0.999769;SGB=-6.87069;MQSB=1;MQ0F=0;ICB=0.3;HOB=0.125;AC=1;AN=4;DP4=32,22,7,9;MQ=60;ANN=C	frameshift_variant	HIGH	Gene_Vitvi01g01071.t01	Gene_Vitvi01g01071.t01	transcript	Vitvi01g01071.t01	Coding	6\23	c.1323delT	p.Leu442fs	1324\2628	1323\2408	441\201		WARNING_TRANSCRIPT_MULTIPLE_STOP_CODONS;LOF=(Gene_Vitvi01g01071.t01	Gene_Vitvi01g01071.t01	1	1.00) GT:PL:DP:AD 0\2:255,0,11:36:21,15 0\2:0,86,46:34:33,1
Noirv2.chr1 13432613 . TGCCATTCTTGCTCTATC T 193.0 . INDEL;IDV=9;IMF=0.290323;DP=84;VDB=3.9594e-07;SGB=4.69269;MQSB=1;MQ0F=0;ICB=0.3;HOB=0.125;AC=1;AN=4;DP4=24,51,0,9;MQ=60;ANN=T	frameshift_variant	HIGH	Gene_Vitvi01g01076.t01	Gene_Vitvi01g01076.t01	transcript	Vitvi01g01076.t01	Coding	2\2	c.51_67delGATAGAGCAAGAATGGC	p.Ile18fs	67\21	51\21	17\26		,T	upstream_gene_variant	MODIFIER	Gene_Vitvi01g01077.t01	Gene_Vitvi01g01077.t01	transcript	Vitvi01g01077.t01	Coding		c.-716_-700delGCCATTCTTGCTCTATC					716	;LOF=(Gene_Vitvi01g01076.t01	Gene_Vitvi01g01076.t01	1	1.00) GT:PL:DP:AD 0\2:0,160,255:53:53,0 0\2:227,0,255:31:22,9
Noirv2.chr1 13433126 . T C 477.0 . DP=130;VDB=0.559455;SGB=-22.8277;RPB=0.631469;MQB=1;MQSB=1;BQB=0.297769;MQ0F=0;ICB=0.5;HOB=0.5;AC=2;AN=4;DP4=25,30,32,36;MQ=60;ANN=C	start_lost	HIGH	Gene_Vitvi01g01076.t01	Gene_Vitvi01g01076.t01	transcript	Vitvi01g01076.t01	Coding	1\2	c.1A>G	p.Met1?	1\21	1\21	1\26		,C	upstream_gene_variant	MODIFIER	Gene_Vitvi01g01077.t01	Gene_Vitvi01g01077.t01	transcript	Vitvi01g01077.t01	Coding		c.-204T>C					204	;LOF=(Gene_Vitvi01g01076.t01	Gene_Vitvi01g01076.t01	1	1.00) GT:PL:DP:AD 0\2:255,0,255:80:29,51 0\2:255,0,255:43:26,17
Noirv2.chr1 13433380 . TCCC TCC 350.0 . INDEL;IDV=68;IMF=0.971429;DP=103;VDB=0.792118;SGB=-19.7591;MQSB=1;MQ0F=0;ICB=0.5;HOB=0.5;AC=2;AN=4;DP4=22,23,31,27;MQ=60;ANN=TCC	frameshift_variant	HIGH	Gene_Vitvi01g01077.t01	Gene_Vitvi01g01077.t01	transcript	Vitvi01g01077.t01	Coding	1\24	c.54delC	p.Asn19fs	54\2472	54\2472	18\223		,TCC	upstream_gene_variant	MODIFIER	Gene_Vitvi01g01076.t01	Gene_Vitvi01g01076.t01	transcript	Vitvi01g01076.t01	Coding		c.-257delG					257	GT:PL:DP:AD 0\2:164,0,254:70:34,36 0\2:219,0,171:33:11,22
Noirv2.chr1 13433505 . AAGA AAGAGA 221.0 . INDEL;IDV=16;IMF=0.326531;DP=82;VDB=0.692711;SGB=9.53539;MQSB=0.999471;MQ0F=0;ICB=0.3;HOB=0.125;AC=1;AN=4;DP4=34,32,10,6;MQ=59;ANN=AAGAGA	frameshift_variant	HIGH	Gene_Vitvi01g01077.t01	Gene_Vitvi01g01077.t01	transcript	Vitvi01g01077.t01	Coding	2\24	c.81_82dupGA	p.Met28fs	83\2472	83\2472	28\223		,AAGAGA	upstream_gene_variant	MODIFIER	Gene_Vitvi01g01076.t01	Gene_Vitvi01g01076.t01	transcript	Vitvi01g01076.t01	Coding		c.-383_-382insTC					383	GT:PL:DP:AD 0\2:255,0,255:49:33,16 0\2:0,99,255:33:33,0
Noirv2.chr1 13435830 . TCCTAC TCCTACCTAC 210.0 . INDEL;IDV=18;IMF=0.257143;DP=102;VDB=0.240339;SGB=8.15014;MQSB=0.992088;MQ0F=0;ICB=0.3;HOB=0.125;AC=1;AN=4;DP4=54,34,12,2;MQ=59;ANN=TCCTACCTAC	frameshift_variant	HIGH	Gene_Vitvi01g01077.t01	Gene_Vitvi01g01077.t01	transcript	Vitvi01g01077.t01	Coding	8\24	c.1414_1417dupCTAC	p.His473fs	1418\2472	1418\2472	473\223		,TCCTACCTAC	upstream_gene_variant	MODIFIER	Gene_Vitvi01g01076.t01	Gene_Vitvi01g01076.t01	transcript	Vitvi01g01076.t01	Coding		c.-2710_-2709insGTAG					2710	;LOF=(Gene_Vitvi01g01077.t01	Gene_Vitvi01g01077.t01	1	1.00) GT:PL:DP:AD 0\2:245,0,255:70:56,14 0\2:0,96,255:32:32,0
Noirv2.chr1 13437283 . G A 221.0 . DP=135;VDB=0.688692;SGB=15.0794;RPB=0.847368;MQB=1;MQSB=1;BQB=0.24549;MQ0F=0;ICB=0.3;HOB=0.125;AC=1;AN=4;DP4=63,37,15,9;MQ=60;ANN=A	stop_gained	HIGH	Gene_Vitvi01g01077.t01	Gene_Vitvi01g01077.t01	transcript	Vitvi01g01077.t01	Coding	13\24	c.2264G>A	p.Trp755*	2264\2472	2264\2472	755\223		,A	upstream_gene_variant	MODIFIER	Gene_Vitvi01g01076.t01	Gene_Vitvi01g01076.t01	transcript	Vitvi01g01076.t01	Coding		c.-4157C>T					4157	;LOF=(Gene_Vitvi01g01077.t01	Gene_Vitvi01g01077.t01	1	1.00);NMD=(Gene_Vitvi01g01077.t01	Gene_Vitvi01g01077.t01	1	1.00) GT:PL:DP:AD 0\2:255,0,255:89:65,24 0\2:0,105,255:35:35,0
Noirv2.chr1 13460349 . T A 408.0 . DP=40;VDB=0.0972736;SGB=-1.01052;MQSB=0.958969;MQ0F=0;AC=4;AN=4;DP4=0,0,29,10;MQ=59;ANN=A	stop_lost&splice_region_variant	HIGH	Gene_Vitvi01g01078.t01	Gene_Vitvi01g01078.t01	transcript	Vitvi01g01078.t01	Coding	1\2	c.156A>T	p.Ter52Tyrext*?	156\256	156\256	52\21		,A	upstream_gene_variant	MODIFIER	Gene_Vitvi01g01079.t01	Gene_Vitvi01g01079.t01	transcript	Vitvi01g01079.t01	Coding		c.-3304T>A					3303	WARNING_TRANSCRIPT_MULTIPLE_STOP_CODONS GT:PL:DP:AD 1\2:255,84,0:28:0,28 1\2:180,33,0:11:0,11
Noirv2.chr1 13460361 . A C 282.0 . DP=48;VDB=0.507243;SGB=-9.01927;RPB=0.805099;MQB=1;MQSB=0.958679;BQB=0.954107;MQ0F=0;ICB=0.5;HOB=0.5;AC=2;AN=4;DP4=11,11,23,0;MQ=59;ANN=C	stop_gained	HIGH	Gene_Vitvi01g01078.t01	Gene_Vitvi01g01078.t01	transcript	Vitvi01g01078.t01	Coding	1\2	c.144T>G	p.Tyr48*	144\256	144\256	48\21		,C	upstream_gene_variant	MODIFIER	Gene_Vitvi01g01079.t01	Gene_Vitvi01g01079.t01	transcript	Vitvi01g01079.t01	Coding		c.-3292A>C					3291	WARNING_TRANSCRIPT_MULTIPLE_STOP_CODONS GT:PL:DP:AD 0\2:154,0,255:29:17,12 0\2:161,0,98:16:5,11
Noirv2.chr1 13465979 . A T 207.0 . DP=69;VDB=0.515892;SGB=8.15014;RPB=0.617813;MQB=1;MQSB=1;BQB=0.593619;MQ0F=0;ICB=0.3;HOB=0.125;AC=1;AN=4;DP4=21,30,4,10;MQ=60;ANN=T	stop_lost	HIGH	Gene_Vitvi01g01079.t01	Gene_Vitvi01g01079.t01	transcript	Vitvi01g01079.t01	Coding	2\2	c.762A>T	p.Ter254Cysext*?	763\2725	762\2724	254\273		WARNING_TRANSCRIPT_MULTIPLE_STOP_CODONS,T	upstream_gene_variant	MODIFIER	Gene_Vitvi01g01080.t01	Gene_Vitvi01g01080.t01	transcript	Vitvi01g01080.t01	Coding		c.-4818A>T					4818	GT:PL:DP:AD 0\2:241,0,255:38:24,14 0\2:0,81,255:27:27,0
Noirv2.chr1 13466122 . A T 221.0 . DP=55;VDB=0.460995;SGB=8.84268;RPB=0.884761;MQB=1;MQSB=1;BQB=0.661626;MQ0F=0;ICB=0.3;HOB=0.125;AC=1;AN=4;DP4=16,21,8,7;MQ=60;ANN=T	stop_lost	HIGH	Gene_Vitvi01g01079.t01	Gene_Vitvi01g01079.t01	transcript	Vitvi01g01079.t01	Coding	2\2	c.905A>T	p.Ter302Leuext*?	906\2725	905\2724	302\273		WARNING_TRANSCRIPT_MULTIPLE_STOP_CODONS,T	upstream_gene_variant	MODIFIER	Gene_Vitvi01g01080.t01	Gene_Vitvi01g01080.t01	transcript	Vitvi01g01080.t01	Coding		c.-4675A>T					4675	GT:PL:DP:AD 0\2:0,93,255:31:31,0 0\2:255,0,119:21:6,15
Noirv2.chr1 13466600 . A G 483.0 . DP=51;VDB=0.261451;SGB=-1.38431;MQSB=1;MQ0F=0;AC=4;AN=4;DP4=0,0,30,12;MQ=60;ANN=G	stop_lost	HIGH	Gene_Vitvi01g01079.t01	Gene_Vitvi01g01079.t01	transcript	Vitvi01g01079.t01	Coding	2\2	c.1383A>G	p.Ter461Trpext*?	1384\2725	1383\2724	461\273		WARNING_TRANSCRIPT_MULTIPLE_STOP_CODONS,G	upstream_gene_variant	MODIFIER	Gene_Vitvi01g01080.t01	Gene_Vitvi01g01080.t01	transcript	Vitvi01g01080.t01	Coding		c.-4197A>G					4197	GT:PL:DP:AD 1\2:255,60,0:20:0,20 1\2:255,66,0:22:0,22
Noirv2.chr1 13470799 . GTTTTTTTTT GTTTTTTT 9.49696 . INDEL;IDV=6;IMF=0.75;DP=8;VDB=0.00142669;SGB=0.620439;MQSB=0.868321;MQ0F=0;ICB=1;HOB=0.5;AC=1;AN=2;DP4=3,2,1,2;MQ=42;ANN=GTTTTTTT	frameshift_variant	HIGH	Gene_Vitvi01g01080.t01	Gene_Vitvi01g01080.t01	transcript	Vitvi01g01080.t01	Coding	1\2	c.11_12delTT	p.Phe4fs	11\238	11\238	4\25		,GTTTTTTT	downstream_gene_variant	MODIFIER	Gene_Vitvi01g01079.t01	Gene_Vitvi01g01079.t01	transcript	Vitvi01g01079.t01	Coding		c.*3720_*3721delTT					3720	WARNING_TRANSCRIPT_MULTIPLE_STOP_CODONS;LOF=(Gene_Vitvi01g01080.t01	Gene_Vitvi01g01080.t01	1	1.00) GT:PL:DP:AD ./.:0,0,0:0:0,0 0\2:39,0,50:8:5,3
Noirv2.chr1 13471300 . G A 155.0 . DP=36;VDB=0.599178;SGB=7.4578;RPB=0.827943;MQB=1;MQSB=1;BQB=0.291388;MQ0F=0;ICB=0.3;HOB=0.125;AC=1;AN=4;DP4=19,3,12,1;MQ=60;ANN=A	splice_acceptor_variant&intron_variant	HIGH	Gene_Vitvi01g01080.t01	Gene_Vitvi01g01080.t01	transcript	Vitvi01g01080.t01	Coding	1\2	c.82-1G>A						,A	downstream_gene_variant	MODIFIER	Gene_Vitvi01g01079.t01	Gene_Vitvi01g01079.t01	transcript	Vitvi01g01079.t01	Coding		c.*4213G>A					4213	WARNING_TRANSCRIPT_MULTIPLE_STOP_CODONS;LOF=(Gene_Vitvi01g01080.t01	Gene_Vitvi01g01080.t01	1	1.00) GT:PL:DP:AD 0\2:0,48,233:16:16,0 0\2:189,0,116:19:6,13
Noirv2.chr1 12003411 . A C 483.0 . DP=56;VDB=0.237819;SGB=-1.38595;MQSB=1;MQ0F=0;AC=4;AN=4;DP4=0,0,30,22;MQ=60;ANN=C	synonymous_variant	LOW	Gene_Vitvi01g00980.t01	Gene_Vitvi01g00980.t01	transcript	Vitvi01g00980.t01	Coding	1\2	c.987T>G	p.Pro329Pro	1223\2537	987\2068	329\255		GT:PL:DP:AD 1\2:255,78,0:26:0,26 1\2:255,78,0:26:0,26
Noirv2.chr1 12003669 . C T 421.0 . DP=61;VDB=0.951;SGB=-11.1672;RPB=0.63827;MQB=1;MQSB=1;BQB=0.898593;MQ0F=0;ICB=0.5;HOB=0.5;AC=2;AN=4;DP4=17,12,13,17;MQ=60;ANN=T	synonymous_variant	LOW	Gene_Vitvi01g00980.t01	Gene_Vitvi01g00980.t01	transcript	Vitvi01g00980.t01	Coding	1\2	c.729G>A	p.Gln243Gln	965\2537	729\2068	243\255		GT:PL:DP:AD 0\2:199,0,255:31:20,11 0\2:255,0,173:28:9,19
Noirv2.chr1 12003738 . C T 221.0 . DP=53;VDB=0.746499;SGB=8.15014;RPB=0.911558;MQB=1;MQSB=1;BQB=0.814963;MQ0F=0;ICB=0.3;HOB=0.125;AC=1;AN=4;DP4=17,16,7,7;MQ=60;ANN=T	synonymous_variant	LOW	Gene_Vitvi01g00980.t01	Gene_Vitvi01g00980.t01	transcript	Vitvi01g00980.t01	Coding	1\2	c.660G>A	p.Pro220Pro	896\2537	660\2068	220\255		GT:PL:DP:AD 0\2:255,0,191:24:10,14 0\2:0,69,255:23:23,0
Noirv2.chr1 12003771 . G A 141.0 . DP=51;VDB=0.391945;SGB=4.69269;RPB=0.904595;MQB=1;MQSB=1;BQB=0.161167;MQ0F=0;ICB=0.3;HOB=0.125;AC=1;AN=4;DP4=16,18,6,3;MQ=60;ANN=A	synonymous_variant	LOW	Gene_Vitvi01g00980.t01	Gene_Vitvi01g00980.t01	transcript	Vitvi01g00980.t01	Coding	1\2	c.627C>T	p.Thr209Thr	863\2537	627\2068	209\255		GT:PL:DP:AD 0\2:175,0,255:21:12,9 0\2:0,66,255:22:22,0
Noirv2.chr1 12003900 . G T 221.0 . DP=58;VDB=0.370685;SGB=10.2282;RPB=0.994261;MQB=1;MQSB=1;BQB=0.398907;MQ0F=0;ICB=0.3;HOB=0.125;AC=1;AN=4;DP4=14,21,7,10;MQ=60;ANN=T	synonymous_variant	LOW	Gene_Vitvi01g00980.t01	Gene_Vitvi01g00980.t01	transcript	Vitvi01g00980.t01	Coding	1\2	c.498C>A	p.Gly166Gly	734\2537	498\2068	166\255		GT:PL:DP:AD 0\2:255,0,207:29:12,17 0\2:0,69,255:23:23,0
Noirv2.chr1 12011170 . A G 221.0 . DP=71;VDB=0.592075;SGB=8.15014;RPB=0.503604;MQB=1;MQSB=1;BQB=0.266452;MQ0F=0;ICB=0.3;HOB=0.125;AC=1;AN=4;DP4=26,29,6,8;MQ=60;ANN=G	splice_region_variant	LOW	Gene_Vitvi01g00981.t01	Gene_Vitvi01g00981.t01	transcript	Vitvi01g00981.t01	Coding	8\2	c.*242T>C						,G	3_prime_UTR_variant	MODIFIER	Gene_Vitvi01g00981.t01	Gene_Vitvi01g00981.t01	transcript	Vitvi01g00981.t01	Coding	8\2	c.*242T>C					242	GT:PL:DP:AD 0\2:255,0,255:38:24,14 0\2:0,93,255:31:31,0
Noirv2.chr1 12011496 . A G 184.0 . DP=61;VDB=0.87833;SGB=10.2282;RPB=0.890055;MQB=1;MQSB=1;BQB=0.0211274;MQ0F=0;ICB=0.3;HOB=0.125;AC=1;AN=4;DP4=18,20,13,4;MQ=60;ANN=G	synonymous_variant	LOW	Gene_Vitvi01g00981.t01	Gene_Vitvi01g00981.t01	transcript	Vitvi01g00981.t01	Coding	8\2	c.567T>C	p.Ser189Ser	567\295	567\251	189\216		GT:PL:DP:AD 0\2:218,0,255:31:14,17 0\2:0,72,255:24:24,0
Noirv2.chr1 12012190 . T A 221.0 . DP=67;VDB=0.482332;SGB=8.15014;RPB=0.999115;MQB=1;MQSB=1;BQB=0.65642;MQ0F=0;ICB=0.3;HOB=0.125;AC=1;AN=4;DP4=24,24,4,10;MQ=60;ANN=A	splice_region_variant&intron_variant	LOW	Gene_Vitvi01g00981.t01	Gene_Vitvi01g00981.t01	transcript	Vitvi01g00981.t01	Coding	7\2	c.506+7A>T						GT:PL:DP:AD 0\2:0,99,255:33:33,0 0\2:255,0,255:29:15,14
Noirv2.chr1 12012208 . T G 477.0 . DP=68;VDB=0.0564633;SGB=-11.1672;RPB=0.991607;MQB=1;MQSB=1;BQB=0.979811;MQ0F=0;ICB=0.5;HOB=0.5;AC=2;AN=4;DP4=10,21,16,14;MQ=60;ANN=G	synonymous_variant	LOW	Gene_Vitvi01g00981.t01	Gene_Vitvi01g00981.t01	transcript	Vitvi01g00981.t01	Coding	7\2	c.495A>C	p.Pro165Pro	495\295	495\251	165\216		GT:PL:DP:AD 0\2:255,0,255:34:18,16 0\2:255,0,255:27:13,14
Noirv2.chr1 12012232 . A G 221.0 . DP=71;VDB=0.446931;SGB=10.2282;RPB=0.758479;MQB=1;MQSB=1;BQB=0.363123;MQ0F=0;ICB=0.3;HOB=0.125;AC=1;AN=4;DP4=20,31,11,6;MQ=60;ANN=G	synonymous_variant	LOW	Gene_Vitvi01g00981.t01	Gene_Vitvi01g00981.t01	transcript	Vitvi01g00981.t01	Coding	7\2	c.471T>C	p.Asp157Asp	471\295	471\251	157\216		GT:PL:DP:AD 0\2:0,114,255:38:38,0 0\2:255,0,255:30:13,17
Noirv2.chr1 12014180 . G A 463.0 . DP=65;VDB=0.504943;SGB=-10.8604;RPB=0.023173;MQB=1;MQSB=1;BQB=0.996994;MQ0F=0;ICB=0.5;HOB=0.5;AC=2;AN=4;DP4=18,15,12,17;MQ=60;ANN=A	synonymous_variant	LOW	Gene_Vitvi01g00981.t01	Gene_Vitvi01g00981.t01	transcript	Vitvi01g00981.t01	Coding	5\2	c.363C>T	p.Val121Val	363\295	363\251	121\216		GT:PL:DP:AD 0\2:255,0,255:34:18,16 0\2:241,0,255:28:15,13
Noirv2.chr1 12014213 . A G 483.0 . DP=67;VDB=0.24172;SGB=-1.38617;MQSB=1;MQ0F=0;AC=4;AN=4;DP4=0,0,29,30;MQ=60;ANN=G	synonymous_variant	LOW	Gene_Vitvi01g00981.t01	Gene_Vitvi01g00981.t01	transcript	Vitvi01g00981.t01	Coding	5\2	c.330T>C	p.Ala110Ala	330\295	330\251	110\216		GT:PL:DP:AD 1\2:255,87,0:29:0,29 1\2:255,90,0:30:0,30
Noirv2.chr1 12014228 . C T 221.0 . DP=70;VDB=0.482385;SGB=11.6141;RPB=0.284561;MQB=1;MQSB=1;BQB=0.961509;MQ0F=0;ICB=0.3;HOB=0.125;AC=1;AN=4;DP4=25,24,8,11;MQ=60;ANN=T	synonymous_variant	LOW	Gene_Vitvi01g00981.t01	Gene_Vitvi01g00981.t01	transcript	Vitvi01g00981.t01	Coding	5\2	c.315G>A	p.Ser105Ser	315\295	315\251	105\216		GT:PL:DP:AD 0\2:0,96,255:32:32,0 0\2:255,0,255:36:17,19
Noirv2.chr1 12015065 . C T 483.0 . DP=54;VDB=0.271058;SGB=-1.38583;MQSB=1;MQ0F=0;AC=4;AN=4;DP4=0,0,14,39;MQ=60;ANN=T	synonymous_variant	LOW	Gene_Vitvi01g00981.t01	Gene_Vitvi01g00981.t01	transcript	Vitvi01g00981.t01	Coding	4\2	c.291G>A	p.Glu97Glu	291\295	291\251	97\216		GT:PL:DP:AD 1\2:255,75,0:25:0,25 1\2:255,84,0:28:0,28
Noirv2.chr1 12015137 . C T 158.0 . DP=58;VDB=0.649418;SGB=6.07412;RPB=0.735599;MQB=1;MQSB=1;BQB=0.880166;MQ0F=0;ICB=0.3;HOB=0.125;AC=1;AN=4;DP4=13,32,7,4;MQ=60;ANN=T	synonymous_variant	LOW	Gene_Vitvi01g00981.t01	Gene_Vitvi01g00981.t01	transcript	Vitvi01g00981.t01	Coding	4\2	c.219G>A	p.Leu73Leu	219\295	219\251	73\216		GT:PL:DP:AD 0\2:0,87,255:29:29,0 0\2:192,0,255:27:16,11
Noirv2.chr1 12015152 . A G 483.0 . DP=53;VDB=0.0314253;SGB=-1.38543;MQSB=1;MQ0F=0;AC=4;AN=4;DP4=0,0,18,31;MQ=60;ANN=G	synonymous_variant	LOW	Gene_Vitvi01g00981.t01	Gene_Vitvi01g00981.t01	transcript	Vitvi01g00981.t01	Coding	4\2	c.204T>C	p.Phe68Phe	204\295	204\251	68\216		GT:PL:DP:AD 1\2:255,78,0:26:0,26 1\2:255,69,0:23:0,23
Noirv2.chr1 12015372 . C A 221.0 . DP=43;VDB=0.166322;SGB=6.76576;RPB=0.576349;MQB=1;MQSB=1;BQB=0.521502;MQ0F=0;ICB=0.3;HOB=0.125;AC=1;AN=4;DP4=14,13,5,7;MQ=60;ANN=A	splice_region_variant&intron_variant	LOW	Gene_Vitvi01g00981.t01	Gene_Vitvi01g00981.t01	transcript	Vitvi01g00981.t01	Coding	2\2	c.157-6G>T						GT:PL:DP:AD 0\2:0,60,255:20:20,0 0\2:255,0,161:19:7,12
Noirv2.chr1 12015525 . A C 365.0 . DP=52;VDB=0.0583395;SGB=-8.71242;RPB=0.929009;MQB=1;MQSB=1;BQB=0.42333;MQ0F=0;ICB=0.5;HOB=0.5;AC=2;AN=4;DP4=14,11,16,6;MQ=60;ANN=C	synonymous_variant	LOW	Gene_Vitvi01g00981.t01	Gene_Vitvi01g00981.t01	transcript	Vitvi01g00981.t01	Coding	2\2	c.138T>G	p.Ser46Ser	138\295	138\251	46\216		GT:PL:DP:AD 0\2:232,0,252:31:16,15 0\2:166,0,192:16:9,7
Noirv2.chr1 12015575 . G A 221.0 . DP=57;VDB=0.451105;SGB=11.6141;RPB=0.218676;MQB=1;MQSB=1;BQB=0.504999;MQ0F=0;ICB=0.3;HOB=0.125;AC=1;AN=4;DP4=19,13,13,6;MQ=60;ANN=A	splice_region_variant&intron_variant	LOW	Gene_Vitvi01g00981.t01	Gene_Vitvi01g00981.t01	transcript	Vitvi01g00981.t01	Coding	1\2	c.91-3C>T						GT:PL:DP:AD 0\2:255,0,255:34:15,19 0\2:0,51,255:17:17,0
Noirv2.chr1 12016028 . A T 396.0 . DP=52;VDB=0.218894;SGB=-9.32613;RPB=0.731945;MQB=1;MQSB=1;BQB=0.624721;MQ0F=0;ICB=0.5;HOB=0.5;AC=2;AN=4;DP4=6,19,15,9;MQ=60;ANN=T	synonymous_variant	LOW	Gene_Vitvi01g00981.t01	Gene_Vitvi01g00981.t01	transcript	Vitvi01g00981.t01	Coding	1\2	c.21T>A	p.Thr7Thr	21\295	21\251	7\216		GT:PL:DP:AD 0\2:174,0,217:20:12,8 0\2:255,0,230:29:13,16
Noirv2.chr1 12042388 . A G 483.0 . DP=30;VDB=0.707719;SGB=-1.35274;MQSB=1;MQ0F=0;AC=4;AN=4;DP4=0,0,19,10;MQ=60;ANN=G	synonymous_variant	LOW	Gene_Vitvi01g00982.t01	Gene_Vitvi01g00982.t01	transcript	Vitvi01g00982.t01	Coding	4\2	c.687T>C	p.Ala229Ala	687\229	687\229	229\242		,G	downstream_gene_variant	MODIFIER	Gene_Vitvi01g00983.t01	Gene_Vitvi01g00983.t01	transcript	Vitvi01g00983.t01	Coding		c.*1084T>C					1084	GT:PL:DP:AD 1\2:255,51,0:17:0,17 1\2:255,36,0:12:0,12
Noirv2.chr1 12042391 . A G 483.0 . DP=31;VDB=0.698782;SGB=-1.35274;MQSB=1;MQ0F=0;AC=4;AN=4;DP4=0,0,19,10;MQ=60;ANN=G	synonymous_variant	LOW	Gene_Vitvi01g00982.t01	Gene_Vitvi01g00982.t01	transcript	Vitvi01g00982.t01	Coding	4\2	c.684T>C	p.Val228Val	684\229	684\229	228\242		,G	downstream_gene_variant	MODIFIER	Gene_Vitvi01g00983.t01	Gene_Vitvi01g00983.t01	transcript	Vitvi01g00983.t01	Coding		c.*1081T>C					1081	GT:PL:DP:AD 1\2:255,51,0:17:0,17 1\2:255,36,0:12:0,12
Noirv2.chr1 12042439 . C T 216.0 . DP=27;VDB=0.278007;SGB=8.15014;RPB=0.713793;MQB=1;MQSB=1;BQB=0.986604;MQ0F=0;ICB=0.5;HOB=0.5;AC=2;AN=4;DP4=7,4,6,8;MQ=60;ANN=T	synonymous_variant	LOW	Gene_Vitvi01g00982.t01	Gene_Vitvi01g00982.t01	transcript	Vitvi01g00982.t01	Coding	4\2	c.636G>A	p.Ser212Ser	636\229	636\229	212\242		,T	downstream_gene_variant	MODIFIER	Gene_Vitvi01g00983.t01	Gene_Vitvi01g00983.t01	transcript	Vitvi01g00983.t01	Coding		c.*1033G>A					1033	GT:PL:DP:AD 1\2:255,42,0:14:0,14 0\2:0,33,255:11:11,0
Noirv2.chr1 12042498 . A G 210.0 . DP=31;VDB=0.67338;SGB=4.69269;RPB=0.984963;MQB=1;MQSB=1;BQB=0.438629;MQ0F=0;ICB=0.5;HOB=0.5;AC=2;AN=4;DP4=10,12,3,6;MQ=60;ANN=G	splice_region_variant&intron_variant	LOW	Gene_Vitvi01g00982.t01	Gene_Vitvi01g00982.t01	transcript	Vitvi01g00982.t01	Coding	3\2	c.580-3T>C						,G	downstream_gene_variant	MODIFIER	Gene_Vitvi01g00983.t01	Gene_Vitvi01g00983.t01	transcript	Vitvi01g00983.t01	Coding		c.*974T>C					974	GT:PL:DP:AD 0\2:0,66,255:22:22,0 1\2:249,27,0:9:0,9
Noirv2.chr1 12042729 . G A 216.0 . DP=38;VDB=0.51895;SGB=15.7726;RPB=0.858898;MQB=1;MQSB=1;BQB=0.175497;MQ0F=0;ICB=0.5;HOB=0.5;AC=2;AN=4;DP4=3,9,17,8;MQ=60;ANN=A	synonymous_variant	LOW	Gene_Vitvi01g00982.t01	Gene_Vitvi01g00982.t01	transcript	Vitvi01g00982.t01	Coding	3\2	c.552C>T	p.Leu184Leu	552\229	552\229	184\242		,A	upstream_gene_variant	MODIFIER	Gene_Vitvi01g00984.t01	Gene_Vitvi01g00984.t01	transcript	Vitvi01g00984.t01	Coding		c.-4791G>A					4791	,A	downstream_gene_variant	MODIFIER	Gene_Vitvi01g00983.t01	Gene_Vitvi01g00983.t01	transcript	Vitvi01g00983.t01	Coding		c.*743C>T					743	GT:PL:DP:AD 1\2:255,75,0:25:0,25 0\2:0,36,255:12:12,0
Noirv2.chr1 12042756 . A G 438.0 . DP=29;VDB=0.501723;SGB=-1.15155;MQSB=1;MQ0F=0;AC=4;AN=4;DP4=0,0,13,16;MQ=60;ANN=G	synonymous_variant	LOW	Gene_Vitvi01g00982.t01	Gene_Vitvi01g00982.t01	transcript	Vitvi01g00982.t01	Coding	3\2	c.525T>C	p.Phe175Phe	525\229	525\229	175\242		,G	upstream_gene_variant	MODIFIER	Gene_Vitvi01g00984.t01	Gene_Vitvi01g00984.t01	transcript	Vitvi01g00984.t01	Coding		c.-4764A>G					4764	,G	downstream_gene_variant	MODIFIER	Gene_Vitvi01g00983.t01	Gene_Vitvi01g00983.t01	transcript	Vitvi01g00983.t01	Coding		c.*716T>C					716	GT:PL:DP:AD 1\2:255,60,0:20:0,20 1\2:210,27,0:9:0,9
Noirv2.chr1 12042783 . C T 150.0 . DP=25;VDB=0.188964;SGB=3.31571;RPB=0.980111;MQB=1;MQSB=1;BQB=0.986146;MQ0F=0;ICB=0.5;HOB=0.5;AC=2;AN=4;DP4=6,10,1,6;MQ=60;ANN=T	synonymous_variant	LOW	Gene_Vitvi01g00982.t01	Gene_Vitvi01g00982.t01	transcript	Vitvi01g00982.t01	Coding	3\2	c.498G>A	p.Leu166Leu	498\229	498\229	166\242		,T	upstream_gene_variant	MODIFIER	Gene_Vitvi01g00984.t01	Gene_Vitvi01g00984.t01	transcript	Vitvi01g00984.t01	Coding		c.-4737C>T					4737	,T	downstream_gene_variant	MODIFIER	Gene_Vitvi01g00983.t01	Gene_Vitvi01g00983.t01	transcript	Vitvi01g00983.t01	Coding		c.*689G>A					689	GT:PL:DP:AD 0\2:0,48,255:16:16,0 1\2:189,21,0:7:0,7
Noirv2.chr1 12042849 . T C 474.0 . DP=27;VDB=0.264871;SGB=-1.22069;MQSB=1;MQ0F=0;AC=4;AN=4;DP4=0,0,7,20;MQ=60;ANN=C	synonymous_variant	LOW	Gene_Vitvi01g00982.t01	Gene_Vitvi01g00982.t01	transcript	Vitvi01g00982.t01	Coding	3\2	c.432A>G	p.Leu144Leu	432\229	432\229	144\242		,C	upstream_gene_variant	MODIFIER	Gene_Vitvi01g00984.t01	Gene_Vitvi01g00984.t01	transcript	Vitvi01g00984.t01	Coding		c.-4671T>C					4671	,C	downstream_gene_variant	MODIFIER	Gene_Vitvi01g00983.t01	Gene_Vitvi01g00983.t01	transcript	Vitvi01g00983.t01	Coding		c.*623A>G					623	GT:PL:DP:AD 1\2:255,54,0:18:0,18 1\2:246,27,0:9:0,9
Noirv2.chr1 12042919 . A C 483.0 . DP=34;VDB=0.131695;SGB=-1.35676;MQSB=1;MQ0F=0;AC=4;AN=4;DP4=0,0,12,20;MQ=60;ANN=C	splice_region_variant&intron_variant	LOW	Gene_Vitvi01g00982.t01	Gene_Vitvi01g00982.t01	transcript	Vitvi01g00982.t01	Coding	2\2	c.367-5T>G						,C	upstream_gene_variant	MODIFIER	Gene_Vitvi01g00984.t01	Gene_Vitvi01g00984.t01	transcript	Vitvi01g00984.t01	Coding		c.-4601A>C					4601	,C	downstream_gene_variant	MODIFIER	Gene_Vitvi01g00983.t01	Gene_Vitvi01g00983.t01	transcript	Vitvi01g00983.t01	Coding		c.*553T>G					553	GT:PL:DP:AD 1\2:255,57,0:19:0,19 1\2:255,39,0:13:0,13
Noirv2.chr1 12042963 . T C 483.0 . DP=35;VDB=0.615094;SGB=-1.37482;MQSB=1;MQ0F=0;AC=4;AN=4;DP4=0,0,15,19;MQ=60;ANN=C	splice_region_variant&intron_variant	LOW	Gene_Vitvi01g00982.t01	Gene_Vitvi01g00982.t01	transcript	Vitvi01g00982.t01	Coding	2\2	c.366+6A>G						,C	upstream_gene_variant	MODIFIER	Gene_Vitvi01g00984.t01	Gene_Vitvi01g00984.t01	transcript	Vitvi01g00984.t01	Coding		c.-4557T>C					4557	,C	downstream_gene_variant	MODIFIER	Gene_Vitvi01g00983.t01	Gene_Vitvi01g00983.t01	transcript	Vitvi01g00983.t01	Coding		c.*509A>G					509	GT:PL:DP:AD 1\2:255,57,0:19:0,19 1\2:255,45,0:15:0,15
Noirv2.chr1 12043068 . A G 483.0 . DP=29;VDB=0.517404;SGB=-1.28242;MQSB=1;MQ0F=0;AC=4;AN=4;DP4=0,0,18,10;MQ=60;ANN=G	synonymous_variant	LOW	Gene_Vitvi01g00982.t01	Gene_Vitvi01g00982.t01	transcript	Vitvi01g00982.t01	Coding	2\2	c.267T>C	p.Thr89Thr	267\229	267\229	89\242		,G	upstream_gene_variant	MODIFIER	Gene_Vitvi01g00984.t01	Gene_Vitvi01g00984.t01	transcript	Vitvi01g00984.t01	Coding		c.-4452A>G					4452	,G	downstream_gene_variant	MODIFIER	Gene_Vitvi01g00983.t01	Gene_Vitvi01g00983.t01	transcript	Vitvi01g00983.t01	Coding		c.*404T>C					404	GT:PL:DP:AD 1\2:255,54,0:18:0,18 1\2:255,30,0:10:0,10
Noirv2.chr1 12043077 . A G 463.0 . DP=32;VDB=0.692923;SGB=-1.10801;MQSB=1;MQ0F=0;AC=4;AN=4;DP4=0,0,19,11;MQ=60;ANN=G	synonymous_variant	LOW	Gene_Vitvi01g00982.t01	Gene_Vitvi01g00982.t01	transcript	Vitvi01g00982.t01	Coding	2\2	c.258T>C	p.Pro86Pro	258\229	258\229	86\242		,G	upstream_gene_variant	MODIFIER	Gene_Vitvi01g00984.t01	Gene_Vitvi01g00984.t01	transcript	Vitvi01g00984.t01	Coding		c.-4443A>G					4443	,G	downstream_gene_variant	MODIFIER	Gene_Vitvi01g00983.t01	Gene_Vitvi01g00983.t01	transcript	Vitvi01g00983.t01	Coding		c.*395T>C					395	GT:PL:DP:AD 1\2:255,63,0:21:0,21 1\2:235,27,0:9:0,9
Noirv2.chr1 12043151 . T G 436.0 . DP=30;VDB=0.85919;SGB=-1.20208;MQSB=1;MQ0F=0;AC=4;AN=4;DP4=0,0,13,11;MQ=60;ANN=G	synonymous_variant	LOW	Gene_Vitvi01g00982.t01	Gene_Vitvi01g00982.t01	transcript	Vitvi01g00982.t01	Coding	2\2	c.184A>C	p.Arg62Arg	184\229	184\229	62\242		,G	upstream_gene_variant	MODIFIER	Gene_Vitvi01g00984.t01	Gene_Vitvi01g00984.t01	transcript	Vitvi01g00984.t01	Coding		c.-4369T>G					4369	,G	downstream_gene_variant	MODIFIER	Gene_Vitvi01g00983.t01	Gene_Vitvi01g00983.t01	transcript	Vitvi01g00983.t01	Coding		c.*321A>C					321	GT:PL:DP:AD 1\2:255,48,0:16:0,16 1\2:208,24,0:8:0,8
Noirv2.chr1 12043158 . G A 200.0 . DP=32;VDB=0.662672;SGB=5.38303;RPB=0.22545;MQB=1;MQSB=1;BQB=0.992842;MQ0F=0;ICB=0.5;HOB=0.5;AC=2;AN=4;DP4=13,5,3,7;MQ=60;ANN=A	synonymous_variant	LOW	Gene_Vitvi01g00982.t01	Gene_Vitvi01g00982.t01	transcript	Vitvi01g00982.t01	Coding	2\2	c.177C>T	p.Arg59Arg	177\229	177\229	59\242		,A	upstream_gene_variant	MODIFIER	Gene_Vitvi01g00984.t01	Gene_Vitvi01g00984.t01	transcript	Vitvi01g00984.t01	Coding		c.-4362G>A					4362	,A	downstream_gene_variant	MODIFIER	Gene_Vitvi01g00983.t01	Gene_Vitvi01g00983.t01	transcript	Vitvi01g00983.t01	Coding		c.*314C>T					314	GT:PL:DP:AD 0\2:0,54,255:18:18,0 1\2:239,30,0:10:0,10
Noirv2.chr1 12043170 . A G 483.0 . DP=32;VDB=0.965042;SGB=-1.32512;MQSB=1;MQ0F=0;AC=4;AN=4;DP4=0,0,15,10;MQ=60;ANN=G	synonymous_variant	LOW	Gene_Vitvi01g00982.t01	Gene_Vitvi01g00982.t01	transcript	Vitvi01g00982.t01	Coding	2\2	c.165T>C	p.Asp55Asp	165\229	165\229	55\242		,G	upstream_gene_variant	MODIFIER	Gene_Vitvi01g00984.t01	Gene_Vitvi01g00984.t01	transcript	Vitvi01g00984.t01	Coding		c.-4350A>G					4350	,G	downstream_gene_variant	MODIFIER	Gene_Vitvi01g00983.t01	Gene_Vitvi01g00983.t01	transcript	Vitvi01g00983.t01	Coding		c.*302T>C					302	GT:PL:DP:AD 1\2:255,45,0:15:0,15 1\2:255,30,0:10:0,10
Noirv2.chr1 12043173 . G A 216.0 . DP=33;VDB=0.182879;SGB=5.38303;RPB=0.178061;MQB=1;MQSB=1;BQB=0.694693;MQ0F=0;ICB=0.5;HOB=0.5;AC=2;AN=4;DP4=13,4,4,6;MQ=60;ANN=A	synonymous_variant	LOW	Gene_Vitvi01g00982.t01	Gene_Vitvi01g00982.t01	transcript	Vitvi01g00982.t01	Coding	2\2	c.162C>T	p.Thr54Thr	162\229	162\229	54\242		,A	upstream_gene_variant	MODIFIER	Gene_Vitvi01g00984.t01	Gene_Vitvi01g00984.t01	transcript	Vitvi01g00984.t01	Coding		c.-4347G>A					4347	,A	downstream_gene_variant	MODIFIER	Gene_Vitvi01g00983.t01	Gene_Vitvi01g00983.t01	transcript	Vitvi01g00983.t01	Coding		c.*299C>T					299	GT:PL:DP:AD 0\2:0,51,255:17:17,0 1\2:255,30,0:10:0,10
Noirv2.chr1 12043288 . G A 483.0 . DP=36;VDB=0.0564921;SGB=-1.3728;MQSB=0.894839;MQ0F=0;AC=4;AN=4;DP4=0,0,21,14;MQ=58;ANN=A	synonymous_variant	LOW	Gene_Vitvi01g00982.t01	Gene_Vitvi01g00982.t01	transcript	Vitvi01g00982.t01	Coding	1\2	c.141C>T	p.Leu47Leu	141\229	141\229	47\242		,A	upstream_gene_variant	MODIFIER	Gene_Vitvi01g00984.t01	Gene_Vitvi01g00984.t01	transcript	Vitvi01g00984.t01	Coding		c.-4232G>A					4232	,A	downstream_gene_variant	MODIFIER	Gene_Vitvi01g00983.t01	Gene_Vitvi01g00983.t01	transcript	Vitvi01g00983.t01	Coding		c.*184C>T					184	GT:PL:DP:AD 1\2:255,60,0:20:0,20 1\2:255,45,0:15:0,15
Noirv2.chr1 12043332 . G A 146.0 . DP=30;VDB=0.408139;SGB=3.31571;RPB=0.120366;MQB=0.914166;MQSB=0.808142;BQB=0.412117;MQ0F=0;ICB=0.5;HOB=0.5;AC=2;AN=4;DP4=7,11,5,2;MQ=57;ANN=A	synonymous_variant	LOW	Gene_Vitvi01g00982.t01	Gene_Vitvi01g00982.t01	transcript	Vitvi01g00982.t01	Coding	1\2	c.97C>T	p.Leu33Leu	97\229	97\229	33\242		,A	upstream_gene_variant	MODIFIER	Gene_Vitvi01g00984.t01	Gene_Vitvi01g00984.t01	transcript	Vitvi01g00984.t01	Coding		c.-4188G>A					4188	,A	downstream_gene_variant	MODIFIER	Gene_Vitvi01g00983.t01	Gene_Vitvi01g00983.t01	transcript	Vitvi01g00983.t01	Coding		c.*140C>T					140	GT:PL:DP:AD 0\2:0,54,255:18:18,0 1\2:185,21,0:7:0,7
Noirv2.chr1 12043339 . C T 420.0 . DP=30;VDB=0.802684;SGB=-1.1673;MQSB=0.955682;MQ0F=0;AC=4;AN=4;DP4=0,0,11,14;MQ=59;ANN=T	synonymous_variant	LOW	Gene_Vitvi01g00982.t01	Gene_Vitvi01g00982.t01	transcript	Vitvi01g00982.t01	Coding	1\2	c.90G>A	p.Lys30Lys	90\229	90\229	30\242		,T	upstream_gene_variant	MODIFIER	Gene_Vitvi01g00984.t01	Gene_Vitvi01g00984.t01	transcript	Vitvi01g00984.t01	Coding		c.-4181C>T					4181	,T	downstream_gene_variant	MODIFIER	Gene_Vitvi01g00983.t01	Gene_Vitvi01g00983.t01	transcript	Vitvi01g00983.t01	Coding		c.*133G>A					133	GT:PL:DP:AD 1\2:255,51,0:17:0,17 1\2:192,24,0:8:0,8
Noirv2.chr1 12043390 . A G 416.0 . DP=29;VDB=0.267636;SGB=-0.920825;MQSB=1;MQ0F=0;AC=4;AN=4;DP4=0,0,13,13;MQ=60;ANN=G	synonymous_variant	LOW	Gene_Vitvi01g00982.t01	Gene_Vitvi01g00982.t01	transcript	Vitvi01g00982.t01	Coding	1\2	c.39T>C	p.His13His	39\229	39\229	13\242		,G	upstream_gene_variant	MODIFIER	Gene_Vitvi01g00984.t01	Gene_Vitvi01g00984.t01	transcript	Vitvi01g00984.t01	Coding		c.-4130A>G					4130	,G	downstream_gene_variant	MODIFIER	Gene_Vitvi01g00983.t01	Gene_Vitvi01g00983.t01	transcript	Vitvi01g00983.t01	Coding		c.*82T>C					82	GT:PL:DP:AD 1\2:255,57,0:19:0,19 1\2:188,21,0:7:0,7
Noirv2.chr1 12043478 . A G 462.0 . DP=29;VDB=0.182639;SGB=-1.15155;MQSB=1;MQ0F=0;AC=4;AN=4;DP4=0,0,14,15;MQ=60;ANN=G	synonymous_variant	LOW	Gene_Vitvi01g00983.t01	Gene_Vitvi01g00983.t01	transcript	Vitvi01g00983.t01	Coding	6\2	c.1086T>C	p.Leu362Leu	1086\2092	1086\2092	362\263		,G	upstream_gene_variant	MODIFIER	Gene_Vitvi01g00982.t01	Gene_Vitvi01g00982.t01	transcript	Vitvi01g00982.t01	Coding		c.-50T>C					50	,G	upstream_gene_variant	MODIFIER	Gene_Vitvi01g00984.t01	Gene_Vitvi01g00984.t01	transcript	Vitvi01g00984.t01	Coding		c.-4042A>G					4042	GT:PL:DP:AD 1\2:255,60,0:20:0,20 1\2:234,27,0:9:0,9
Noirv2.chr1 12043523 . T A 216.0 . DP=37;VDB=0.927936;SGB=13.6932;RPB=0.937128;MQB=1;MQSB=1;BQB=0.948762;MQ0F=0;ICB=0.5;HOB=0.5;AC=2;AN=4;DP4=2,10,15,7;MQ=60;ANN=A	synonymous_variant	LOW	Gene_Vitvi01g00983.t01	Gene_Vitvi01g00983.t01	transcript	Vitvi01g00983.t01	Coding	6\2	c.1041A>T	p.Thr347Thr	1041\2092	1041\2092	347\263		,A	upstream_gene_variant	MODIFIER	Gene_Vitvi01g00982.t01	Gene_Vitvi01g00982.t01	transcript	Vitvi01g00982.t01	Coding		c.-95A>T					95	,A	upstream_gene_variant	MODIFIER	Gene_Vitvi01g00984.t01	Gene_Vitvi01g00984.t01	transcript	Vitvi01g00984.t01	Coding		c.-3997T>A					3997	GT:PL:DP:AD 1\2:255,66,0:22:0,22 0\2:0,36,250:12:12,0
Noirv2.chr1 12043529 . G A 216.0 . DP=35;VDB=0.821884;SGB=13.0002;RPB=0.988858;MQB=1;MQSB=1;BQB=0.434522;MQ0F=0;ICB=0.5;HOB=0.5;AC=2;AN=4;DP4=2,10,14,7;MQ=60;ANN=A	synonymous_variant	LOW	Gene_Vitvi01g00983.t01	Gene_Vitvi01g00983.t01	transcript	Vitvi01g00983.t01	Coding	6\2	c.1035C>T	p.Pro345Pro	1035\2092	1035\2092	345\263		,A	upstream_gene_variant	MODIFIER	Gene_Vitvi01g00982.t01	Gene_Vitvi01g00982.t01	transcript	Vitvi01g00982.t01	Coding		c.-101C>T					101	,A	upstream_gene_variant	MODIFIER	Gene_Vitvi01g00984.t01	Gene_Vitvi01g00984.t01	transcript	Vitvi01g00984.t01	Coding		c.-3991G>A					3991	GT:PL:DP:AD 1\2:255,63,0:21:0,21 0\2:0,36,245:12:12,0
Noirv2.chr1 12043550 . G A 216.0 . DP=34;VDB=0.0830042;SGB=10.9211;RPB=0.92962;MQB=1;MQSB=1;BQB=0.99899;MQ0F=0;ICB=0.5;HOB=0.5;AC=2;AN=4;DP4=2,9,12,6;MQ=60;ANN=A	synonymous_variant	LOW	Gene_Vitvi01g00983.t01	Gene_Vitvi01g00983.t01	transcript	Vitvi01g00983.t01	Coding	6\2	c.1014C>T	p.Thr338Thr	1014\2092	1014\2092	338\263		,A	upstream_gene_variant	MODIFIER	Gene_Vitvi01g00982.t01	Gene_Vitvi01g00982.t01	transcript	Vitvi01g00982.t01	Coding		c.-122C>T					122	,A	upstream_gene_variant	MODIFIER	Gene_Vitvi01g00984.t01	Gene_Vitvi01g00984.t01	transcript	Vitvi01g00984.t01	Coding		c.-3970G>A					3970	GT:PL:DP:AD 1\2:255,54,0:18:0,18 0\2:0,33,238:11:11,0
Noirv2.chr1 12043712 . G A 483.0 . DP=35;VDB=0.693341;SGB=-1.03473;MQSB=1;MQ0F=0;AC=4;AN=4;DP4=0,0,15,20;MQ=60;ANN=A	synonymous_variant	LOW	Gene_Vitvi01g00983.t01	Gene_Vitvi01g00983.t01	transcript	Vitvi01g00983.t01	Coding	5\2	c.909C>T	p.Asn303Asn	909\2092	909\2092	303\263		,A	upstream_gene_variant	MODIFIER	Gene_Vitvi01g00982.t01	Gene_Vitvi01g00982.t01	transcript	Vitvi01g00982.t01	Coding		c.-284C>T					284	,A	upstream_gene_variant	MODIFIER	Gene_Vitvi01g00984.t01	Gene_Vitvi01g00984.t01	transcript	Vitvi01g00984.t01	Coding		c.-3808G>A					3808	GT:PL:DP:AD 1\2:255,75,0:25:0,25 1\2:255,30,0:10:0,10
Noirv2.chr1 12043738 . C T 216.0 . DP=32;VDB=0.382624;SGB=5.38303;RPB=0.8878;MQB=1;MQSB=1;BQB=0.776391;MQ0F=0;ICB=0.5;HOB=0.5;AC=2;AN=4;DP4=8,14,5,5;MQ=60;ANN=T	splice_region_variant&intron_variant	LOW	Gene_Vitvi01g00983.t01	Gene_Vitvi01g00983.t01	transcript	Vitvi01g00983.t01	Coding	4\2	c.890-7G>A						,T	upstream_gene_variant	MODIFIER	Gene_Vitvi01g00982.t01	Gene_Vitvi01g00982.t01	transcript	Vitvi01g00982.t01	Coding		c.-310G>A					310	,T	upstream_gene_variant	MODIFIER	Gene_Vitvi01g00984.t01	Gene_Vitvi01g00984.t01	transcript	Vitvi01g00984.t01	Coding		c.-3782C>T					3782	GT:PL:DP:AD 0\2:0,66,255:22:22,0 1\2:255,30,0:10:0,10
Noirv2.chr1 12044048 . T C 466.0 . DP=27;VDB=0.0829589;SGB=-1.29956;MQSB=1;MQ0F=0;AC=4;AN=4;DP4=0,0,16,11;MQ=60;ANN=C	synonymous_variant	LOW	Gene_Vitvi01g00983.t01	Gene_Vitvi01g00983.t01	transcript	Vitvi01g00983.t01	Coding	4\2	c.885A>G	p.Gly295Gly	885\2092	885\2092	295\263		,C	upstream_gene_variant	MODIFIER	Gene_Vitvi01g00982.t01	Gene_Vitvi01g00982.t01	transcript	Vitvi01g00982.t01	Coding		c.-620A>G					620	,C	upstream_gene_variant	MODIFIER	Gene_Vitvi01g00984.t01	Gene_Vitvi01g00984.t01	transcript	Vitvi01g00984.t01	Coding		c.-3472T>C					3472	GT:PL:DP:AD 1\2:255,51,0:17:0,17 1\2:238,30,0:10:0,10
Noirv2.chr1 12044090 . T C 216.0 . DP=30;VDB=0.682426;SGB=10.2282;RPB=0.986085;MQB=1;MQSB=1;BQB=0.821148;MQ0F=0;ICB=0.5;HOB=0.5;AC=2;AN=4;DP4=8,5,11,6;MQ=60;ANN=C	synonymous_variant	LOW	Gene_Vitvi01g00983.t01	Gene_Vitvi01g00983.t01	transcript	Vitvi01g00983.t01	Coding	4\2	c.843A>G	p.Leu281Leu	843\2092	843\2092	281\263		,C	upstream_gene_variant	MODIFIER	Gene_Vitvi01g00982.t01	Gene_Vitvi01g00982.t01	transcript	Vitvi01g00982.t01	Coding		c.-662A>G					662	,C	upstream_gene_variant	MODIFIER	Gene_Vitvi01g00984.t01	Gene_Vitvi01g00984.t01	transcript	Vitvi01g00984.t01	Coding		c.-3430T>C					3430	GT:PL:DP:AD 1\2:255,51,0:17:0,17 0\2:0,39,255:13:13,0
Noirv2.chr1 12044162 . G A 216.0 . DP=31;VDB=0.630944;SGB=8.15014;RPB=0.976472;MQB=1;MQSB=1;BQB=0.999048;MQ0F=0;ICB=0.5;HOB=0.5;AC=2;AN=4;DP4=9,6,5,9;MQ=60;ANN=A	synonymous_variant	LOW	Gene_Vitvi01g00983.t01	Gene_Vitvi01g00983.t01	transcript	Vitvi01g00983.t01	Coding	4\2	c.771C>T	p.Ala257Ala	771\2092	771\2092	257\263		,A	upstream_gene_variant	MODIFIER	Gene_Vitvi01g00982.t01	Gene_Vitvi01g00982.t01	transcript	Vitvi01g00982.t01	Coding		c.-734C>T					734	,A	upstream_gene_variant	MODIFIER	Gene_Vitvi01g00984.t01	Gene_Vitvi01g00984.t01	transcript	Vitvi01g00984.t01	Coding		c.-3358G>A					3358	GT:PL:DP:AD 0\2:0,45,255:15:15,0 1\2:255,42,0:14:0,14
Noirv2.chr1 12044207 . G A 216.0 . DP=32;VDB=0.474446;SGB=8.15014;RPB=0.82972;MQB=1;MQSB=1;BQB=0.171881;MQ0F=0;ICB=0.5;HOB=0.5;AC=2;AN=4;DP4=6,9,7,7;MQ=60;ANN=A	synonymous_variant	LOW	Gene_Vitvi01g00983.t01	Gene_Vitvi01g00983.t01	transcript	Vitvi01g00983.t01	Coding	4\2	c.726C>T	p.Ser242Ser	726\2092	726\2092	242\263		,A	upstream_gene_variant	MODIFIER	Gene_Vitvi01g00982.t01	Gene_Vitvi01g00982.t01	transcript	Vitvi01g00982.t01	Coding		c.-779C>T					779	,A	upstream_gene_variant	MODIFIER	Gene_Vitvi01g00984.t01	Gene_Vitvi01g00984.t01	transcript	Vitvi01g00984.t01	Coding		c.-3313G>A					3313	GT:PL:DP:AD 1\2:255,42,0:14:0,14 0\2:0,45,255:15:15,0
Noirv2.chr1 12044246 . A G 216.0 . DP=34;VDB=0.198247;SGB=8.84268;RPB=0.813784;MQB=1;MQSB=1;BQB=0.974658;MQ0F=0;ICB=0.5;HOB=0.5;AC=2;AN=4;DP4=9,8,8,7;MQ=60;ANN=G	synonymous_variant	LOW	Gene_Vitvi01g00983.t01	Gene_Vitvi01g00983.t01	transcript	Vitvi01g00983.t01	Coding	4\2	c.687T>C	p.Phe229Phe	687\2092	687\2092	229\263		,G	upstream_gene_variant	MODIFIER	Gene_Vitvi01g00982.t01	Gene_Vitvi01g00982.t01	transcript	Vitvi01g00982.t01	Coding		c.-818T>C					818	,G	upstream_gene_variant	MODIFIER	Gene_Vitvi01g00984.t01	Gene_Vitvi01g00984.t01	transcript	Vitvi01g00984.t01	Coding		c.-3274A>G					3274	GT:PL:DP:AD 1\2:255,45,0:15:0,15 0\2:0,51,255:17:17,0
Noirv2.chr1 12044261 . G A 216.0 . DP=34;VDB=0.127291;SGB=8.84268;RPB=0.449249;MQB=1;MQSB=1;BQB=0.719219;MQ0F=0;ICB=0.5;HOB=0.5;AC=2;AN=4;DP4=9,8,8,7;MQ=60;ANN=A	synonymous_variant	LOW	Gene_Vitvi01g00983.t01	Gene_Vitvi01g00983.t01	transcript	Vitvi01g00983.t01	Coding	4\2	c.672C>T	p.Phe224Phe	672\2092	672\2092	224\263		,A	upstream_gene_variant	MODIFIER	Gene_Vitvi01g00982.t01	Gene_Vitvi01g00982.t01	transcript	Vitvi01g00982.t01	Coding		c.-833C>T					833	,A	upstream_gene_variant	MODIFIER	Gene_Vitvi01g00984.t01	Gene_Vitvi01g00984.t01	transcript	Vitvi01g00984.t01	Coding		c.-3259G>A					3259	GT:PL:DP:AD 0\2:0,51,255:17:17,0 1\2:255,45,0:15:0,15
Noirv2.chr1 12044264 . C T 216.0 . DP=32;VDB=0.586948;SGB=9.53539;RPB=0.58971;MQB=1;MQSB=1;BQB=0.742992;MQ0F=0;ICB=0.5;HOB=0.5;AC=2;AN=4;DP4=8,7,8,8;MQ=60;ANN=T	synonymous_variant	LOW	Gene_Vitvi01g00983.t01	Gene_Vitvi01g00983.t01	transcript	Vitvi01g00983.t01	Coding	4\2	c.669G>A	p.Arg223Arg	669\2092	669\2092	223\263		,T	upstream_gene_variant	MODIFIER	Gene_Vitvi01g00982.t01	Gene_Vitvi01g00982.t01	transcript	Vitvi01g00982.t01	Coding		c.-836G>A					836	,T	upstream_gene_variant	MODIFIER	Gene_Vitvi01g00984.t01	Gene_Vitvi01g00984.t01	transcript	Vitvi01g00984.t01	Coding		c.-3256C>T					3256	GT:PL:DP:AD 1\2:255,48,0:16:0,16 0\2:0,45,255:15:15,0
Noirv2.chr1 12044474 . T C 483.0 . DP=43;VDB=0.394305;SGB=-1.37755;MQSB=1;MQ0F=0;AC=4;AN=4;DP4=0,0,24,16;MQ=60;ANN=C	synonymous_variant	LOW	Gene_Vitvi01g00983.t01	Gene_Vitvi01g00983.t01	transcript	Vitvi01g00983.t01	Coding	4\2	c.459A>G	p.Ser153Ser	459\2092	459\2092	153\263		,C	upstream_gene_variant	MODIFIER	Gene_Vitvi01g00982.t01	Gene_Vitvi01g00982.t01	transcript	Vitvi01g00982.t01	Coding		c.-1046A>G					1046	,C	upstream_gene_variant	MODIFIER	Gene_Vitvi01g00984.t01	Gene_Vitvi01g00984.t01	transcript	Vitvi01g00984.t01	Coding		c.-3046T>C					3046	GT:PL:DP:AD 1\2:255,69,0:23:0,23 1\2:255,51,0:17:0,17
Noirv2.chr1 12044488 . A G 483.0 . DP=45;VDB=0.173197;SGB=-1.36114;MQSB=1;MQ0F=0;AC=4;AN=4;DP4=0,0,24,18;MQ=60;ANN=G	splice_region_variant&intron_variant	LOW	Gene_Vitvi01g00983.t01	Gene_Vitvi01g00983.t01	transcript	Vitvi01g00983.t01	Coding	3\2	c.451-6T>C						,G	upstream_gene_variant	MODIFIER	Gene_Vitvi01g00982.t01	Gene_Vitvi01g00982.t01	transcript	Vitvi01g00982.t01	Coding		c.-1060T>C					1060	,G	upstream_gene_variant	MODIFIER	Gene_Vitvi01g00984.t01	Gene_Vitvi01g00984.t01	transcript	Vitvi01g00984.t01	Coding		c.-3032A>G					3032	GT:PL:DP:AD 1\2:255,78,0:26:0,26 1\2:255,48,0:16:0,16
Noirv2.chr1 12044778 . A G 216.0 . DP=49;VDB=0.507823;SGB=19.2382;RPB=0.903815;MQB=1;MQSB=1;BQB=0.347989;MQ0F=0;ICB=0.5;HOB=0.5;AC=2;AN=4;DP4=7,9,11,19;MQ=60;ANN=G	synonymous_variant	LOW	Gene_Vitvi01g00983.t01	Gene_Vitvi01g00983.t01	transcript	Vitvi01g00983.t01	Coding	3\2	c.402T>C	p.Arg134Arg	402\2092	402\2092	134\263		,G	upstream_gene_variant	MODIFIER	Gene_Vitvi01g00982.t01	Gene_Vitvi01g00982.t01	transcript	Vitvi01g00982.t01	Coding		c.-1350T>C					1350	,G	upstream_gene_variant	MODIFIER	Gene_Vitvi01g00984.t01	Gene_Vitvi01g00984.t01	transcript	Vitvi01g00984.t01	Coding		c.-2742A>G					2742	GT:PL:DP:AD 1\2:255,90,0:30:0,30 0\2:0,48,255:16:16,0
Noirv2.chr1 12044811 . C T 483.0 . DP=39;VDB=0.543985;SGB=-1.29643;MQSB=1;MQ0F=0;AC=4;AN=4;DP4=0,0,13,25;MQ=60;ANN=T	synonymous_variant	LOW	Gene_Vitvi01g00983.t01	Gene_Vitvi01g00983.t01	transcript	Vitvi01g00983.t01	Coding	3\2	c.369G>A	p.Leu123Leu	369\2092	369\2092	123\263		,T	upstream_gene_variant	MODIFIER	Gene_Vitvi01g00982.t01	Gene_Vitvi01g00982.t01	transcript	Vitvi01g00982.t01	Coding		c.-1383G>A					1383	,T	upstream_gene_variant	MODIFIER	Gene_Vitvi01g00984.t01	Gene_Vitvi01g00984.t01	transcript	Vitvi01g00984.t01	Coding		c.-2709C>T					2709	GT:PL:DP:AD 1\2:255,75,0:25:0,25 1\2:255,39,0:13:0,13
Noirv2.chr1 12044950 . A G 483.0 . DP=57;VDB=0.0566737;SGB=-1.38583;MQSB=1;MQ0F=0;AC=4;AN=4;DP4=0,0,24,26;MQ=60;ANN=G	splice_region_variant&intron_variant	LOW	Gene_Vitvi01g00983.t01	Gene_Vitvi01g00983.t01	transcript	Vitvi01g00983.t01	Coding	2\2	c.234-4T>C						,G	upstream_gene_variant	MODIFIER	Gene_Vitvi01g00982.t01	Gene_Vitvi01g00982.t01	transcript	Vitvi01g00982.t01	Coding		c.-1522T>C					1522	,G	upstream_gene_variant	MODIFIER	Gene_Vitvi01g00984.t01	Gene_Vitvi01g00984.t01	transcript	Vitvi01g00984.t01	Coding		c.-2570A>G					2570	GT:PL:DP:AD 1\2:255,75,0:25:0,25 1\2:255,75,0:25:0,25
Noirv2.chr1 12045093 . G A 194.0 . DP=26;VDB=0.303697;SGB=4.69269;RPB=0.591953;MQB=1;MQSB=1;BQB=0.736848;MQ0F=0;ICB=0.5;HOB=0.5;AC=2;AN=4;DP4=9,8,4,5;MQ=60;ANN=A	synonymous_variant	LOW	Gene_Vitvi01g00983.t01	Gene_Vitvi01g00983.t01	transcript	Vitvi01g00983.t01	Coding	2\2	c.198C>T	p.His66His	198\2092	198\2092	66\263		,A	upstream_gene_variant	MODIFIER	Gene_Vitvi01g00982.t01	Gene_Vitvi01g00982.t01	transcript	Vitvi01g00982.t01	Coding		c.-1665C>T					1665	,A	upstream_gene_variant	MODIFIER	Gene_Vitvi01g00984.t01	Gene_Vitvi01g00984.t01	transcript	Vitvi01g00984.t01	Coding		c.-2427G>A					2427	GT:PL:DP:AD 0\2:0,51,255:17:17,0 1\2:233,27,0:9:0,9
Noirv2.chr1 12045135 . G A 216.0 . DP=27;VDB=0.510004;SGB=10.2282;RPB=0.821229;MQB=1;MQSB=1;BQB=0.940104;MQ0F=0;ICB=0.5;HOB=0.5;AC=2;AN=4;DP4=3,7,10,7;MQ=60;ANN=A	synonymous_variant	LOW	Gene_Vitvi01g00983.t01	Gene_Vitvi01g00983.t01	transcript	Vitvi01g00983.t01	Coding	2\2	c.156C>T	p.Ile52Ile	156\2092	156\2092	52\263		,A	upstream_gene_variant	MODIFIER	Gene_Vitvi01g00982.t01	Gene_Vitvi01g00982.t01	transcript	Vitvi01g00982.t01	Coding		c.-1707C>T					1707	,A	upstream_gene_variant	MODIFIER	Gene_Vitvi01g00984.t01	Gene_Vitvi01g00984.t01	transcript	Vitvi01g00984.t01	Coding		c.-2385G>A					2385	GT:PL:DP:AD 1\2:255,51,0:17:0,17 0\2:0,30,254:10:10,0
Noirv2.chr1 12045195 . C T 150.0 . DP=21;VDB=0.0485232;SGB=2.63044;RPB=0.781802;MQB=1;MQSB=1;BQB=0.732319;MQ0F=0;ICB=0.5;HOB=0.5;AC=2;AN=4;DP4=7,6,2,4;MQ=60;ANN=T	synonymous_variant	LOW	Gene_Vitvi01g00983.t01	Gene_Vitvi01g00983.t01	transcript	Vitvi01g00983.t01	Coding	2\2	c.96G>A	p.Lys32Lys	96\2092	96\2092	32\263		,T	upstream_gene_variant	MODIFIER	Gene_Vitvi01g00982.t01	Gene_Vitvi01g00982.t01	transcript	Vitvi01g00982.t01	Coding		c.-1767G>A					1767	,T	upstream_gene_variant	MODIFIER	Gene_Vitvi01g00984.t01	Gene_Vitvi01g00984.t01	transcript	Vitvi01g00984.t01	Coding		c.-2325C>T					2325	GT:PL:DP:AD 0\2:0,39,255:13:13,0 1\2:189,18,0:6:0,6
Noirv2.chr1 12045198 . G A 439.0 . DP=20;VDB=0.0122933;SGB=-1.23889;MQSB=1;MQ0F=0;AC=4;AN=4;DP4=0,0,9,10;MQ=60;ANN=A	synonymous_variant	LOW	Gene_Vitvi01g00983.t01	Gene_Vitvi01g00983.t01	transcript	Vitvi01g00983.t01	Coding	2\2	c.93C>T	p.Asn31Asn	93\2092	93\2092	31\263		,A	upstream_gene_variant	MODIFIER	Gene_Vitvi01g00982.t01	Gene_Vitvi01g00982.t01	transcript	Vitvi01g00982.t01	Coding		c.-1770C>T					1770	,A	upstream_gene_variant	MODIFIER	Gene_Vitvi01g00984.t01	Gene_Vitvi01g00984.t01	transcript	Vitvi01g00984.t01	Coding		c.-2322G>A					2322	GT:PL:DP:AD 1\2:255,36,0:12:0,12 1\2:211,21,0:7:0,7
Noirv2.chr1 12045225 . C T 483.0 . DP=27;VDB=0.677786;SGB=-1.36786;MQSB=1;MQ0F=0;AC=4;AN=4;DP4=0,0,14,12;MQ=60;ANN=T	synonymous_variant	LOW	Gene_Vitvi01g00983.t01	Gene_Vitvi01g00983.t01	transcript	Vitvi01g00983.t01	Coding	2\2	c.66G>A	p.Thr22Thr	66\2092	66\2092	22\263		,T	upstream_gene_variant	MODIFIER	Gene_Vitvi01g00982.t01	Gene_Vitvi01g00982.t01	transcript	Vitvi01g00982.t01	Coding		c.-1797G>A					1797	,T	upstream_gene_variant	MODIFIER	Gene_Vitvi01g00984.t01	Gene_Vitvi01g00984.t01	transcript	Vitvi01g00984.t01	Coding		c.-2295C>T					2295	GT:PL:DP:AD 1\2:255,39,0:13:0,13 1\2:255,39,0:13:0,13
Noirv2.chr1 12045234 . T G 483.0 . DP=31;VDB=0.924099;SGB=-1.36519;MQSB=1;MQ0F=0;AC=4;AN=4;DP4=0,0,18,12;MQ=60;ANN=G	splice_region_variant&intron_variant	LOW	Gene_Vitvi01g00983.t01	Gene_Vitvi01g00983.t01	transcript	Vitvi01g00983.t01	Coding	1\2	c.62-5A>C						,G	upstream_gene_variant	MODIFIER	Gene_Vitvi01g00982.t01	Gene_Vitvi01g00982.t01	transcript	Vitvi01g00982.t01	Coding		c.-1806A>C					1806	,G	upstream_gene_variant	MODIFIER	Gene_Vitvi01g00984.t01	Gene_Vitvi01g00984.t01	transcript	Vitvi01g00984.t01	Coding		c.-2286T>G					2286	GT:PL:DP:AD 1\2:255,51,0:17:0,17 1\2:255,39,0:13:0,13
Noirv2.chr1 12045237 . A C 483.0 . DP=31;VDB=0.920294;SGB=-1.36519;MQSB=1;MQ0F=0;AC=4;AN=4;DP4=0,0,18,12;MQ=60;ANN=C	splice_region_variant&intron_variant	LOW	Gene_Vitvi01g00983.t01	Gene_Vitvi01g00983.t01	transcript	Vitvi01g00983.t01	Coding	1\2	c.62-8T>G						,C	upstream_gene_variant	MODIFIER	Gene_Vitvi01g00982.t01	Gene_Vitvi01g00982.t01	transcript	Vitvi01g00982.t01	Coding		c.-1809T>G					1809	,C	upstream_gene_variant	MODIFIER	Gene_Vitvi01g00984.t01	Gene_Vitvi01g00984.t01	transcript	Vitvi01g00984.t01	Coding		c.-2283A>C					2283	GT:PL:DP:AD 1\2:255,51,0:17:0,17 1\2:255,39,0:13:0,13
Noirv2.chr1 12045400 . T C 483.0 . DP=45;VDB=0.440219;SGB=-1.28937;MQSB=1;MQ0F=0;AC=4;AN=4;DP4=0,0,19,23;MQ=60;ANN=C	splice_region_variant&intron_variant	LOW	Gene_Vitvi01g00983.t01	Gene_Vitvi01g00983.t01	transcript	Vitvi01g00983.t01	Coding	1\2	c.61+7A>G						,C	upstream_gene_variant	MODIFIER	Gene_Vitvi01g00982.t01	Gene_Vitvi01g00982.t01	transcript	Vitvi01g00982.t01	Coding		c.-1972A>G					1972	,C	upstream_gene_variant	MODIFIER	Gene_Vitvi01g00984.t01	Gene_Vitvi01g00984.t01	transcript	Vitvi01g00984.t01	Coding		c.-2120T>C					2120	GT:PL:DP:AD 1\2:255,84,0:28:0,28 1\2:255,42,0:14:0,14
Noirv2.chr1 12045417 . A G 216.0 . DP=44;VDB=0.805254;SGB=17.1588;RPB=0.81163;MQB=1;MQSB=1;BQB=0.782119;MQ0F=0;ICB=0.5;HOB=0.5;AC=2;AN=4;DP4=4,10,14,13;MQ=60;ANN=G	synonymous_variant	LOW	Gene_Vitvi01g00983.t01	Gene_Vitvi01g00983.t01	transcript	Vitvi01g00983.t01	Coding	1\2	c.51T>C	p.Ala17Ala	51\2092	51\2092	17\263		,G	upstream_gene_variant	MODIFIER	Gene_Vitvi01g00982.t01	Gene_Vitvi01g00982.t01	transcript	Vitvi01g00982.t01	Coding		c.-1989T>C					1989	,G	upstream_gene_variant	MODIFIER	Gene_Vitvi01g00984.t01	Gene_Vitvi01g00984.t01	transcript	Vitvi01g00984.t01	Coding		c.-2103A>G					2103	GT:PL:DP:AD 1\2:255,81,0:27:0,27 0\2:0,42,255:14:14,0
Noirv2.chr1 12045462 . T G 483.0 . DP=39;VDB=0.60429;SGB=-1.31162;MQSB=1;MQ0F=0;AC=4;AN=4;DP4=0,0,18,19;MQ=60;ANN=G	synonymous_variant	LOW	Gene_Vitvi01g00983.t01	Gene_Vitvi01g00983.t01	transcript	Vitvi01g00983.t01	Coding	1\2	c.6A>C	p.Ser2Ser	6\2092	6\2092	2\263		,G	upstream_gene_variant	MODIFIER	Gene_Vitvi01g00982.t01	Gene_Vitvi01g00982.t01	transcript	Vitvi01g00982.t01	Coding		c.-2034A>C					2034	,G	upstream_gene_variant	MODIFIER	Gene_Vitvi01g00984.t01	Gene_Vitvi01g00984.t01	transcript	Vitvi01g00984.t01	Coding		c.-2058T>G					2058	GT:PL:DP:AD 1\2:255,72,0:24:0,24 1\2:255,39,0:13:0,13
Noirv2.chr1 12050036 . A G 481.0 . DP=153;VDB=0.0746505;SGB=-1.38629;RPB=0.963888;MQB=0.268554;MQSB=0.0105196;BQB=0.21793;MQ0F=0;ICB=0.3;HOB=0.125;AC=3;AN=4;DP4=8,14,64,53;MQ=29;ANN=G	synonymous_variant	LOW	Gene_Vitvi01g00984.t01	Gene_Vitvi01g00984.t01	transcript	Vitvi01g00984.t01	Coding	2\2	c.36A>G	p.Ser12Ser	36\23	36\23	12\20		,G	upstream_gene_variant	MODIFIER	Gene_Vitvi01g00983.t01	Gene_Vitvi01g00983.t01	transcript	Vitvi01g00983.t01	Coding		c.-4569T>C					4569	GT:PL:DP:AD 1\2:255,8,0:76:11,65 0\2:255,0,6:63:11,52
Noirv2.chr1 12077925 . T C 483.0 . DP=53;VDB=0.68303;SGB=-1.33829;MQSB=1;MQ0F=0;AC=4;AN=4;DP4=0,0,29,20;MQ=60;ANN=C	synonymous_variant	LOW	Gene_Vitvi01g00985.t01	Gene_Vitvi01g00985.t01	transcript	Vitvi01g00985.t01	Coding	2\2	c.202T>C	p.Leu68Leu	234\2276	202\2202	68\233		GT:PL:DP:AD 1\2:255,96,0:32:0,32 1\2:255,51,0:17:0,17
Noirv2.chr1 12078200 . C T 207.0 . DP=63;VDB=0.154463;SGB=8.84268;RPB=0.481015;MQB=1;MQSB=1;BQB=0.627065;MQ0F=0;ICB=0.3;HOB=0.125;AC=1;AN=4;DP4=25,19,5,10;MQ=60;ANN=T	synonymous_variant	LOW	Gene_Vitvi01g00985.t01	Gene_Vitvi01g00985.t01	transcript	Vitvi01g00985.t01	Coding	2\2	c.477C>T	p.Leu159Leu	509\2276	477\2202	159\233		GT:PL:DP:AD 0\2:241,0,255:38:23,15 0\2:0,63,255:21:21,0
Noirv2.chr1 12078245 . T A 114.0 . DP=49;VDB=0.181959;SGB=1.94933;RPB=0.808052;MQB=1;MQSB=1;BQB=0.110293;MQ0F=0;ICB=0.3;HOB=0.125;AC=1;AN=4;DP4=20,21,2,3;MQ=60;ANN=A	synonymous_variant	LOW	Gene_Vitvi01g00985.t01	Gene_Vitvi01g00985.t01	transcript	Vitvi01g00985.t01	Coding	2\2	c.522T>A	p.Arg174Arg	554\2276	522\2202	174\233		GT:PL:DP:AD 0\2:0,93,255:31:31,0 0\2:148,0,213:15:10,5
Noirv2.chr1 12078410 . A G 483.0 . DP=76;VDB=0.27611;SGB=-1.38253;MQSB=1;MQ0F=0;AC=4;AN=4;DP4=0,0,40,28;MQ=60;ANN=G	synonymous_variant	LOW	Gene_Vitvi01g00985.t01	Gene_Vitvi01g00985.t01	transcript	Vitvi01g00985.t01	Coding	2\2	c.687A>G	p.Glu229Glu	719\2276	687\2202	229\233		GT:PL:DP:AD 1\2:255,126,0:42:0,42 1\2:255,78,0:26:0,26
Noirv2.chr1 12078611 . G T 406.0 . DP=73;VDB=0.96185;SGB=-11.7809;RPB=0.970258;MQB=1;MQSB=1;BQB=0.998793;MQ0F=0;ICB=0.5;HOB=0.5;AC=2;AN=4;DP4=23,13,17,15;MQ=60;ANN=T	synonymous_variant	LOW	Gene_Vitvi01g00985.t01	Gene_Vitvi01g00985.t01	transcript	Vitvi01g00985.t01	Coding	2\2	c.888G>T	p.Arg296Arg	920\2276	888\2202	296\233		GT:PL:DP:AD 0\2:255,0,255:44:21,23 0\2:184,0,255:24:15,9
Noirv2.chr1 12078974 . C T 221.0 . DP=64;VDB=0.989523;SGB=15.7726;RPB=0.753919;MQB=1;MQSB=1;BQB=0.557253;MQ0F=0;ICB=0.3;HOB=0.125;AC=1;AN=4;DP4=12,22,12,13;MQ=60;ANN=T	synonymous_variant	LOW	Gene_Vitvi01g00985.t01	Gene_Vitvi01g00985.t01	transcript	Vitvi01g00985.t01	Coding	2\2	c.1251C>T	p.Asp417Asp	1283\2276	1251\2202	417\233		GT:PL:DP:AD 0\2:255,0,255:43:18,25 0\2:0,48,255:16:16,0
Noirv2.chr1 12079004 . G A 470.0 . DP=67;VDB=0.641315;SGB=-11.1672;RPB=0.908838;MQB=1;MQSB=1;BQB=0.906149;MQ0F=0;ICB=0.5;HOB=0.5;AC=2;AN=4;DP4=20,14,12,18;MQ=60;ANN=A	synonymous_variant	LOW	Gene_Vitvi01g00985.t01	Gene_Vitvi01g00985.t01	transcript	Vitvi01g00985.t01	Coding	2\2	c.1281G>A	p.Leu427Leu	1313\2276	1281\2202	427\233		GT:PL:DP:AD 0\2:255,0,255:43:25,18 0\2:248,0,203:21:9,12
Noirv2.chr1 12079184 . G A 175.0 . DP=59;VDB=0.559804;SGB=8.84268;RPB=0.786083;MQB=1;MQSB=1;BQB=0.930596;MQ0F=0;ICB=0.3;HOB=0.125;AC=1;AN=4;DP4=24,17,13,2;MQ=60;ANN=A	synonymous_variant	LOW	Gene_Vitvi01g00985.t01	Gene_Vitvi01g00985.t01	transcript	Vitvi01g00985.t01	Coding	2\2	c.1461G>A	p.Gly487Gly	1493\2276	1461\2202	487\233		GT:PL:DP:AD 0\2:209,0,255:33:18,15 0\2:0,69,255:23:23,0
Noirv2.chr1 12079379 . T G 221.0 . DP=55;VDB=0.0814763;SGB=9.53539;RPB=0.545859;MQB=1;MQSB=1;BQB=0.871081;MQ0F=0;ICB=0.3;HOB=0.125;AC=1;AN=4;DP4=15,21,6,10;MQ=60;ANN=G	synonymous_variant	LOW	Gene_Vitvi01g00985.t01	Gene_Vitvi01g00985.t01	transcript	Vitvi01g00985.t01	Coding	2\2	c.1656T>G	p.Ala552Ala	1688\2276	1656\2202	552\233		GT:PL:DP:AD 0\2:255,0,249:30:14,16 0\2:0,66,255:22:22,0
Noirv2.chr1 12079403 . C T 221.0 . DP=60;VDB=0.417468;SGB=9.53539;RPB=0.513624;MQB=1;MQSB=1;BQB=0.999842;MQ0F=0;ICB=0.3;HOB=0.125;AC=1;AN=4;DP4=19,22,5,11;MQ=60;ANN=T	synonymous_variant	LOW	Gene_Vitvi01g00985.t01	Gene_Vitvi01g00985.t01	transcript	Vitvi01g00985.t01	Coding	2\2	c.1680C>T	p.His560His	1712\2276	1680\2202	560\233		GT:PL:DP:AD 0\2:255,0,255:35:19,16 0\2:0,66,255:22:22,0
Noirv2.chr1 12079538 . A G 214.0 . DP=80;VDB=0.92;SGB=7.4578;RPB=0.992948;MQB=1;MQSB=1;BQB=0.618813;MQ0F=0;ICB=0.3;HOB=0.125;AC=1;AN=4;DP4=34,28,7,6;MQ=60;ANN=G	synonymous_variant	LOW	Gene_Vitvi01g00985.t01	Gene_Vitvi01g00985.t01	transcript	Vitvi01g00985.t01	Coding	2\2	c.1815A>G	p.Lys605Lys	1847\2276	1815\2202	605\233		GT:PL:DP:AD 0\2:0,132,255:44:44,0 0\2:248,0,255:31:18,13
Noirv2.chr1 12079691 . C G 447.0 . DP=60;VDB=0.0823915;SGB=-10.2467;RPB=0.212746;MQB=1;MQSB=1;BQB=0.848884;MQ0F=0;ICB=0.5;HOB=0.5;AC=2;AN=4;DP4=13,15,13,14;MQ=60;ANN=G	synonymous_variant	LOW	Gene_Vitvi01g00985.t01	Gene_Vitvi01g00985.t01	transcript	Vitvi01g00985.t01	Coding	2\2	c.1968C>G	p.Thr656Thr	2000\2276	1968\2202	656\233		GT:PL:DP:AD 0\2:225,0,255:27:16,11 0\2:255,0,232:28:12,16
Noirv2.chr1 12089887 . A G 25.0228 . DP=13;VDB=0.44;SGB=0.00473136;RPB=0.727273;MQB=0.727273;MQSB=0.997028;BQB=0.818182;MQ0F=0;ICB=0.3;HOB=0.125;AC=1;AN=4;DP4=2,9,2,0;MQ=50;ANN=G	synonymous_variant	LOW	Gene_Vitvi01g00986.t01	Gene_Vitvi01g00986.t01	transcript	Vitvi01g00986.t01	Coding	1\2	c.120T>C	p.Asp40Asp	121\260	120\244	40\27		,G	upstream_gene_variant	MODIFIER	Gene_Vitvi01g00987.t01	Gene_Vitvi01g00987.t01	transcript	Vitvi01g00987.t01	Coding		c.-1314A>G					1314	GT:PL:DP:AD 0\2:0,30,230:10:10,0 0\2:59,0,28:3:1,2
Noirv2.chr1 12089980 . A C,T 268.0 . DP=20;VDB=0.337238;SGB=-1.30291;MQSB=1;MQ0F=0;AC=3,1;AN=4;DP4=0,0,1,18;MQ=35;ANN=C	synonymous_variant	LOW	Gene_Vitvi01g00986.t01	Gene_Vitvi01g00986.t01	transcript	Vitvi01g00986.t01	Coding	1\2	c.27T>G	p.Ala9Ala	28\260	27\244	9\27		,T	synonymous_variant	LOW	Gene_Vitvi01g00986.t01	Gene_Vitvi01g00986.t01	transcript	Vitvi01g00986.t01	Coding	1\2	c.27T>A	p.Ala9Ala	28\260	27\244	9\27		,C	upstream_gene_variant	MODIFIER	Gene_Vitvi01g00987.t01	Gene_Vitvi01g00987.t01	transcript	Vitvi01g00987.t01	Coding		c.-1221A>C					1221	,T	upstream_gene_variant	MODIFIER	Gene_Vitvi01g00987.t01	Gene_Vitvi01g00987.t01
Noirv2.chr1 12110282 . G A 477.0 . DP=78;VDB=0.929626;SGB=-14.8495;RPB=0.980299;MQB=1;MQSB=1;BQB=0.527849;MQ0F=0;ICB=0.5;HOB=0.5;AC=2;AN=4;DP4=18,17,19,23;MQ=60;ANN=A	synonymous_variant	LOW	Gene_Vitvi01g02129.t01	Gene_Vitvi01g02129.t01	transcript	Vitvi01g02129.t01	Coding	6\20	c.474C>T	p.Ser158Ser	536\2133	474\279	158\258		WARNING_TRANSCRIPT_MULTIPLE_STOP_CODONS,A	synonymous_variant	LOW	Gene_Vitvi01g02129.t02	Gene_Vitvi01g02129.t02	transcript	Vitvi01g02129.t02	Coding	6\20	c.474C>T	p.Ser158Ser	533\2074	474\276	158\257		WARNING_TRANSCRIPT_MULTIPLE_STOP_CODONS GT:PL:DP:AD 0\2:255,0,247:43:17,26 0\2:255,0,255:34:18,16
Noirv2.chr1 12110495 . TAAAA TAA 221.0 . INDEL;IDV=9;IMF=0.28125;DP=63;VDB=0.974601;SGB=4.69269;MQSB=1;MQ0F=0;ICB=0.3;HOB=0.125;AC=1;AN=4;DP4=21,33,4,5;MQ=60;ANN=TAA	splice_region_variant&intron_variant	LOW	Gene_Vitvi01g02129.t01	Gene_Vitvi01g02129.t01	transcript	Vitvi01g02129.t01	Coding	4\2	c.393-9_393-8delTT						WARNING_TRANSCRIPT_MULTIPLE_STOP_CODONS,TAA	splice_region_variant&intron_variant	LOW	Gene_Vitvi01g02129.t02	Gene_Vitvi01g02129.t02	transcript	Vitvi01g02129.t02	Coding	4\2	c.393-9_393-8delTT						WARNING_TRANSCRIPT_MULTIPLE_STOP_CODONS,TAA	downstream_gene_variant	MODIFIER	Gene_Vitvi01g00988.t02	Gene_Vitvi01g00988.t02	transcript	Vitvi01g00988.t02	Coding		c.*5869_*5870delTT					4824	WARNING_TRANSCRIPT_MULTIPLE_STOP_CODONS,TAA	downstream_gene_variant	MODIFIER	Gene_Vitvi01g00988.t01	Gene_Vitvi01g00988.t01
Noirv2.chr1 12112382 . G A 186.0 . DP=81;VDB=0.492475;SGB=6.76576;RPB=0.326748;MQB=1;MQSB=1;BQB=0.998423;MQ0F=0;ICB=0.3;HOB=0.125;AC=1;AN=4;DP4=23,42,8,4;MQ=60;ANN=A	synonymous_variant	LOW	Gene_Vitvi01g02129.t01	Gene_Vitvi01g02129.t01	transcript	Vitvi01g02129.t01	Coding	3\20	c.282C>T	p.Leu94Leu	344\2133	282\279	94\258		WARNING_TRANSCRIPT_MULTIPLE_STOP_CODONS,A	synonymous_variant	LOW	Gene_Vitvi01g02129.t02	Gene_Vitvi01g02129.t02	transcript	Vitvi01g02129.t02	Coding	3\20	c.282C>T	p.Leu94Leu	341\2074	282\276	94\257		WARNING_TRANSCRIPT_MULTIPLE_STOP_CODONS,A	downstream_gene_variant	MODIFIER	Gene_Vitvi01g00988.t02	Gene_Vitvi01g00988.t02	transcript	Vitvi01g00988.t02	Coding		c.*3986C>T					2940	WARNING_TRANSCRIPT_MULTIPLE_STOP_CODONS,A	downstream_gene_variant	MODIFIER	Gene_Vitvi01g00988.t01	Gene_Vitvi01g00988.t01
Noirv2.chr1 12113584 . C T 183.0 . DP=57;VDB=0.0512963;SGB=-5.6418;RPB=0.730366;MQB=1;MQSB=1;BQB=0.842035;MQ0F=0;ICB=0.3;HOB=0.125;AC=1;AN=4;DP4=18,22,8,4;MQ=60;ANN=T	splice_region_variant&synonymous_variant	LOW	Gene_Vitvi01g02129.t01	Gene_Vitvi01g02129.t01	transcript	Vitvi01g02129.t01	Coding	2\20	c.111G>A	p.Val37Val	173\2133	111\279	37\258		WARNING_TRANSCRIPT_MULTIPLE_STOP_CODONS,T	splice_region_variant&synonymous_variant	LOW	Gene_Vitvi01g02129.t02	Gene_Vitvi01g02129.t02	transcript	Vitvi01g02129.t02	Coding	2\20	c.111G>A	p.Val37Val	170\2074	111\276	37\257		WARNING_TRANSCRIPT_MULTIPLE_STOP_CODONS,T	downstream_gene_variant	MODIFIER	Gene_Vitvi01g00988.t02	Gene_Vitvi01g00988.t02	transcript	Vitvi01g00988.t02	Coding		c.*2784G>A					1738	WARNING_TRANSCRIPT_MULTIPLE_STOP_CODONS,T	downstream_gene_variant	MODIFIER	Gene_Vitvi01g00988.t01	Gene_Vitvi01g00988.t01
Noirv2.chr1 12115316 . CAGGCATACAAAAAATCCACAGTTGTGTAGTTGAACTTCATA CA 221.0 . INDEL;IDV=11;IMF=0.275;DP=69;VDB=0.873987;SGB=6.07412;MQSB=1;MQ0F=0;ICB=0.3;HOB=0.125;AC=1;AN=4;DP4=26,32,4,7;MQ=60;ANN=CA	splice_region_variant	LOW	Gene_Vitvi01g00988.t02	Gene_Vitvi01g00988.t02	transcript	Vitvi01g00988.t02	Coding	10\20	c.*250_*1050delTATGAAGTTCAACTACACAACTGTGGATTTTTTGTATGCC						WARNING_TRANSCRIPT_MULTIPLE_STOP_CODONS,CA	splice_region_variant	LOW	Gene_Vitvi01g00988.t01	Gene_Vitvi01g00988.t01	transcript	Vitvi01g00988.t01	Coding	9\2	c.*250_*1050delTATGAAGTTCAACTACACAACTGTGGATTTTTTGTATGCC						WARNING_TRANSCRIPT_MULTIPLE_STOP_CODONS,CA	3_prime_UTR_variant	MODIFIER	Gene_Vitvi01g00988.t02	Gene_Vitvi01g00988.t02	transcript	Vitvi01g00988.t02	Coding	10\20	c.*250_*1050delTATGAAGTTCAACTACACAACTGTGGATTTTTTGTATGCC					1011	WARNING_TRANSCRIPT_MULTIPLE_STOP_CODONS,CA	3_prime_UTR_variant	MODIFIER	Gene_Vitvi01g00988.t01	Gene_Vitvi01g00988.t01
Noirv2.chr1 12118139 . C T 397.0 . DP=60;VDB=0.422753;SGB=-9.01927;RPB=0.586936;MQB=1;MQSB=1;BQB=0.694935;MQ0F=0;ICB=0.5;HOB=0.5;AC=2;AN=4;DP4=15,17,15,8;MQ=60;ANN=T	synonymous_variant	LOW	Gene_Vitvi01g00988.t02	Gene_Vitvi01g00988.t02	transcript	Vitvi01g00988.t02	Coding	6\20	c.765G>A	p.Gln255Gln	1071\2985	765\2394	255\263		WARNING_TRANSCRIPT_MULTIPLE_STOP_CODONS,T	synonymous_variant	LOW	Gene_Vitvi01g00988.t01	Gene_Vitvi01g00988.t01	transcript	Vitvi01g00988.t01	Coding	5\2	c.765G>A	p.Gln255Gln	1036\2950	765\2394	255\263		WARNING_TRANSCRIPT_MULTIPLE_STOP_CODONS,T	upstream_gene_variant	MODIFIER	Gene_Vitvi01g02129.t01	Gene_Vitvi01g02129.t01	transcript	Vitvi01g02129.t01	Coding		c.-4091G>A					4029	WARNING_TRANSCRIPT_MULTIPLE_STOP_CODONS,T	upstream_gene_variant	MODIFIER	Gene_Vitvi01g02129.t02	Gene_Vitvi01g02129.t02
Noirv2.chr1 12118163 . G A 477.0 . DP=72;VDB=0.198641;SGB=-11.7809;RPB=0.207004;MQB=1;MQSB=1;BQB=0.890626;MQ0F=0;ICB=0.5;HOB=0.5;AC=2;AN=4;DP4=17,20,19,13;MQ=60;ANN=A	synonymous_variant	LOW	Gene_Vitvi01g00988.t02	Gene_Vitvi01g00988.t02	transcript	Vitvi01g00988.t02	Coding	6\20	c.741C>T	p.Asn247Asn	1047\2985	741\2394	247\263		WARNING_TRANSCRIPT_MULTIPLE_STOP_CODONS,A	synonymous_variant	LOW	Gene_Vitvi01g00988.t01	Gene_Vitvi01g00988.t01	transcript	Vitvi01g00988.t01	Coding	5\2	c.741C>T	p.Asn247Asn	1012\2950	741\2394	247\263		WARNING_TRANSCRIPT_MULTIPLE_STOP_CODONS,A	upstream_gene_variant	MODIFIER	Gene_Vitvi01g02129.t01	Gene_Vitvi01g02129.t01	transcript	Vitvi01g02129.t01	Coding		c.-4115C>T					4053	WARNING_TRANSCRIPT_MULTIPLE_STOP_CODONS,A	upstream_gene_variant	MODIFIER	Gene_Vitvi01g02129.t02	Gene_Vitvi01g02129.t02
Noirv2.chr1 12121731 . T C 221.0 . DP=80;VDB=0.965147;SGB=13.0002;RPB=0.581778;MQB=1;MQSB=1;BQB=0.774521;MQ0F=0;ICB=0.3;HOB=0.125;AC=1;AN=4;DP4=28,28,8,13;MQ=60;ANN=C	synonymous_variant	LOW	Gene_Vitvi01g00988.t02	Gene_Vitvi01g00988.t02	transcript	Vitvi01g00988.t02	Coding	4\20	c.267A>G	p.Leu89Leu	573\2985	267\2394	89\263		WARNING_TRANSCRIPT_MULTIPLE_STOP_CODONS,C	synonymous_variant	LOW	Gene_Vitvi01g00988.t01	Gene_Vitvi01g00988.t01	transcript	Vitvi01g00988.t01	Coding	3\2	c.267A>G	p.Leu89Leu	538\2950	267\2394	89\263		WARNING_TRANSCRIPT_MULTIPLE_STOP_CODONS GT:PL:DP:AD 0\2:255,0,255:41:20,21 0\2:0,108,255:36:36,0
Noirv2.chr1 12121784 . G A 221.0 . DP=72;VDB=0.164315;SGB=8.84268;RPB=0.629942;MQB=1;MQSB=1;BQB=0.936454;MQ0F=0;ICB=0.3;HOB=0.125;AC=1;AN=4;DP4=22,31,9,6;MQ=60;ANN=A	splice_region_variant&intron_variant	LOW	Gene_Vitvi01g00988.t02	Gene_Vitvi01g00988.t02	transcript	Vitvi01g00988.t02	Coding	3\2	c.218-4C>T						WARNING_TRANSCRIPT_MULTIPLE_STOP_CODONS,A	splice_region_variant&intron_variant	LOW	Gene_Vitvi01g00988.t01	Gene_Vitvi01g00988.t01	transcript	Vitvi01g00988.t01	Coding	2\2	c.218-4C>T						WARNING_TRANSCRIPT_MULTIPLE_STOP_CODONS GT:PL:DP:AD 0\2:0,108,255:36:36,0 0\2:255,0,255:32:17,15
Noirv2.chr1 12122397 . A G 221.0 . DP=70;VDB=0.511433;SGB=8.84268;RPB=0.906251;MQB=1;MQSB=1;BQB=0.888024;MQ0F=0;ICB=0.3;HOB=0.125;AC=1;AN=4;DP4=28,26,5,10;MQ=60;ANN=G	synonymous_variant	LOW	Gene_Vitvi01g00988.t02	Gene_Vitvi01g00988.t02	transcript	Vitvi01g00988.t02	Coding	3\20	c.99T>C	p.Ile33Ile	405\2985	99\2394	33\263		WARNING_TRANSCRIPT_MULTIPLE_STOP_CODONS,G	synonymous_variant	LOW	Gene_Vitvi01g00988.t01	Gene_Vitvi01g00988.t01	transcript	Vitvi01g00988.t01	Coding	2\2	c.99T>C	p.Ile33Ile	370\2950	99\2394	33\263		WARNING_TRANSCRIPT_MULTIPLE_STOP_CODONS GT:PL:DP:AD 0\2:0,129,255:43:43,0 0\2:255,0,191:26:11,15
Noirv2.chr1 12122457 . G T 483.0 . DP=66;VDB=0.0759504;SGB=-1.38435;MQSB=1;MQ0F=0;AC=4;AN=4;DP4=0,0,33,28;MQ=60;ANN=T	synonymous_variant	LOW	Gene_Vitvi01g00988.t02	Gene_Vitvi01g00988.t02	transcript	Vitvi01g00988.t02	Coding	3\20	c.39C>A	p.Pro13Pro	345\2985	39\2394	13\263		WARNING_TRANSCRIPT_MULTIPLE_STOP_CODONS,T	synonymous_variant	LOW	Gene_Vitvi01g00988.t01	Gene_Vitvi01g00988.t01	transcript	Vitvi01g00988.t01	Coding	2\2	c.39C>A	p.Pro13Pro	310\2950	39\2394	13\263		WARNING_TRANSCRIPT_MULTIPLE_STOP_CODONS GT:PL:DP:AD 1\2:255,108,0:36:0,36 1\2:255,75,0:25:0,25
Noirv2.chr1 12122537 . T A 483.0 . DP=60;VDB=0.585126;SGB=-1.38297;MQSB=1;MQ0F=0;AC=4;AN=4;DP4=0,0,31,22;MQ=60;ANN=A	splice_region_variant&intron_variant	LOW	Gene_Vitvi01g00988.t02	Gene_Vitvi01g00988.t02	transcript	Vitvi01g00988.t02	Coding	2\2	c.-37-5A>T						WARNING_TRANSCRIPT_MULTIPLE_STOP_CODONS,A	splice_region_variant&intron_variant	LOW	Gene_Vitvi01g00988.t01	Gene_Vitvi01g00988.t01	transcript	Vitvi01g00988.t01	Coding	1\2	c.-37-5A>T						WARNING_TRANSCRIPT_MULTIPLE_STOP_CODONS GT:PL:DP:AD 1\2:255,93,0:31:0,31 1\2:255,66,0:22:0,22
Noirv2.chr1 12123052 . G A 417.0 . DP=59;VDB=0.933226;SGB=-10.2467;RPB=0.997281;MQB=1;MQSB=1;BQB=0.947646;MQ0F=0;ICB=0.5;HOB=0.5;AC=2;AN=4;DP4=17,12,16,11;MQ=60;ANN=A	splice_region_variant	LOW	Gene_Vitvi01g00988.t02	Gene_Vitvi01g00988.t02	transcript	Vitvi01g00988.t02	Coding	1\20	c.-76C>T						WARNING_TRANSCRIPT_MULTIPLE_STOP_CODONS,A	splice_region_variant	LOW	Gene_Vitvi01g00988.t01	Gene_Vitvi01g00988.t01	transcript	Vitvi01g00988.t01	Coding	1\2	c.-40C>T						WARNING_TRANSCRIPT_MULTIPLE_STOP_CODONS,A	5_prime_UTR_variant	MODIFIER	Gene_Vitvi01g00988.t02	Gene_Vitvi01g00988.t02	transcript	Vitvi01g00988.t02	Coding	1\20	c.-76C>T					557	WARNING_TRANSCRIPT_MULTIPLE_STOP_CODONS,A	5_prime_UTR_variant	MODIFIER	Gene_Vitvi01g00988.t01	Gene_Vitvi01g00988.t01
Noirv2.chr1 12130901 . T C 133.0 . DP=56;VDB=0.07273;SGB=4.00342;RPB=0.103385;MQB=1;MQSB=1;BQB=0.979627;MQ0F=0;ICB=0.3;HOB=0.125;AC=1;AN=4;DP4=19,25,4,4;MQ=60;ANN=C	5_prime_UTR_premature_start_codon_gain_variant	LOW	Gene_Vitvi01g00989.t01	Gene_Vitvi01g00989.t01	transcript	Vitvi01g00989.t01	Coding	1\2	c.-123T>C						,C	5_prime_UTR_variant	MODIFIER	Gene_Vitvi01g00989.t01	Gene_Vitvi01g00989.t01	transcript	Vitvi01g00989.t01	Coding	1\2	c.-123T>C					123	GT:PL:DP:AD 0\2:0,90,255:30:30,0 0\2:167,0,246:22:14,8
Noirv2.chr1 12131036 . C T 194.0 . DP=60;VDB=0.759427;SGB=6.07412;RPB=0.283422;MQB=1;MQSB=1;BQB=0.668718;MQ0F=0;ICB=0.3;HOB=0.125;AC=1;AN=4;DP4=19,26,6,5;MQ=60;ANN=T	synonymous_variant	LOW	Gene_Vitvi01g00989.t01	Gene_Vitvi01g00989.t01	transcript	Vitvi01g00989.t01	Coding	1\2	c.13C>T	p.Leu5Leu	225\2284	13\236	5\211		GT:PL:DP:AD 0\2:0,108,255:36:36,0 0\2:228,0,178:20:9,11
Noirv2.chr1 12131218 . C T 483.0 . DP=53;VDB=0.576901;SGB=-1.38414;MQSB=1;MQ0F=0;AC=4;AN=4;DP4=0,0,20,27;MQ=60;ANN=T	synonymous_variant	LOW	Gene_Vitvi01g00989.t01	Gene_Vitvi01g00989.t01	transcript	Vitvi01g00989.t01	Coding	1\2	c.195C>T	p.Gly65Gly	407\2284	195\236	65\211		GT:PL:DP:AD 1\2:255,78,0:26:0,26 1\2:255,63,0:21:0,21
Noirv2.chr1 12131836 . C A 392.0 . DP=55;VDB=0.225866;SGB=-9.93983;RPB=0.200607;MQB=1;MQSB=1;BQB=0.830755;MQ0F=0;ICB=0.5;HOB=0.5;AC=2;AN=4;DP4=13,6,10,16;MQ=60;ANN=A	synonymous_variant	LOW	Gene_Vitvi01g00989.t01	Gene_Vitvi01g00989.t01	transcript	Vitvi01g00989.t01	Coding	1\2	c.813C>A	p.Gly271Gly	1025\2284	813\236	271\211		GT:PL:DP:AD 0\2:255,0,176:30:12,18 0\2:170,0,168:15:7,8
Noirv2.chr1 12131854 . G A 315.0 . DP=54;VDB=0.976514;SGB=-8.09871;RPB=0.997469;MQB=1;MQSB=1;BQB=0.5348;MQ0F=0;ICB=0.5;HOB=0.5;AC=2;AN=4;DP4=12,17,14,6;MQ=60;ANN=A	synonymous_variant	LOW	Gene_Vitvi01g00989.t01	Gene_Vitvi01g00989.t01	transcript	Vitvi01g00989.t01	Coding	1\2	c.831G>A	p.Leu277Leu	1043\2284	831\236	277\211		GT:PL:DP:AD 0\2:217,0,255:31:17,14 0\2:132,0,246:18:12,6
Noirv2.chr1 12131857 . T C 221.0 . DP=55;VDB=0.118061;SGB=10.2282;RPB=0.393771;MQB=1;MQSB=1;BQB=0.903059;MQ0F=0;ICB=0.3;HOB=0.125;AC=1;AN=4;DP4=18,14,8,9;MQ=60;ANN=C	synonymous_variant	LOW	Gene_Vitvi01g00989.t01	Gene_Vitvi01g00989.t01	transcript	Vitvi01g00989.t01	Coding	1\2	c.834T>C	p.Ile278Ile	1046\2284	834\236	278\211		GT:PL:DP:AD 0\2:255,0,232:30:13,17 0\2:0,57,255:19:19,0
Noirv2.chr1 12131887 . G A 483.0 . DP=61;VDB=0.273474;SGB=-1.37307;MQSB=1;MQ0F=0;AC=4;AN=4;DP4=0,0,28,25;MQ=60;ANN=A	synonymous_variant	LOW	Gene_Vitvi01g00989.t01	Gene_Vitvi01g00989.t01	transcript	Vitvi01g00989.t01	Coding	1\2	c.864G>A	p.Arg288Arg	1076\2284	864\236	288\211		GT:PL:DP:AD 1\2:255,99,0:33:0,33 1\2:255,60,0:20:0,20
Noirv2.chr1 12148702 . A G 221.0 . DP=65;VDB=0.214596;SGB=8.84268;RPB=0.963069;MQB=1;MQSB=1;BQB=0.192444;MQ0F=0;ICB=0.3;HOB=0.125;AC=1;AN=4;DP4=22,26,8,7;MQ=60;ANN=G	synonymous_variant	LOW	Gene_Vitvi01g00990.t01	Gene_Vitvi01g00990.t01	transcript	Vitvi01g00990.t01	Coding	1\2	c.6T>C	p.Ser2Ser	6\265	6\265	2\24		,G	upstream_gene_variant	MODIFIER	Gene_Vitvi01g00991.t01	Gene_Vitvi01g00991.t01	transcript	Vitvi01g00991.t01	Coding		c.-1924A>G					1913	WARNING_TRANSCRIPT_MULTIPLE_STOP_CODONS GT:PL:DP:AD 0\2:0,114,255:38:38,0 0\2:255,0,187:25:10,15
Noirv2.chr1 12150691 . T C 213.0 . DP=58;VDB=0.417695;SGB=8.84268;RPB=0.525788;MQB=1;MQSB=1;BQB=0.958005;MQ0F=0;ICB=0.3;HOB=0.125;AC=1;AN=4;DP4=18,22,8,7;MQ=60;ANN=C	synonymous_variant	LOW	Gene_Vitvi01g00991.t01	Gene_Vitvi01g00991.t01	transcript	Vitvi01g00991.t01	Coding	1\2	c.66T>C	p.Gly22Gly	77\2353	66\2046	22\247		WARNING_TRANSCRIPT_MULTIPLE_STOP_CODONS,C	upstream_gene_variant	MODIFIER	Gene_Vitvi01g00990.t01	Gene_Vitvi01g00990.t01	transcript	Vitvi01g00990.t01	Coding		c.-1984A>G					1984	GT:PL:DP:AD 0\2:247,0,255:38:23,15 0\2:0,51,255:17:17,0
Noirv2.chr1 12150706 . T A 172.0 . DP=58;VDB=0.300288;SGB=4.69269;RPB=0.958817;MQB=1;MQSB=1;BQB=0.781203;MQ0F=0;ICB=0.3;HOB=0.125;AC=1;AN=4;DP4=21,26,4,5;MQ=60;ANN=A	synonymous_variant	LOW	Gene_Vitvi01g00991.t01	Gene_Vitvi01g00991.t01	transcript	Vitvi01g00991.t01	Coding	1\2	c.81T>A	p.Pro27Pro	92\2353	81\2046	27\247		WARNING_TRANSCRIPT_MULTIPLE_STOP_CODONS,A	upstream_gene_variant	MODIFIER	Gene_Vitvi01g00990.t01	Gene_Vitvi01g00990.t01	transcript	Vitvi01g00990.t01	Coding		c.-1999A>T					1999	GT:PL:DP:AD 0\2:0,117,255:39:39,0 0\2:206,0,172:17:8,9
Noirv2.chr1 12151676 . C T 461.0 . DP=71;VDB=0.391832;SGB=-11.1672;RPB=0.999523;MQB=1;MQSB=1;BQB=0.890459;MQ0F=0;ICB=0.5;HOB=0.5;AC=2;AN=4;DP4=10,28,18,12;MQ=60;ANN=T	synonymous_variant	LOW	Gene_Vitvi01g00991.t01	Gene_Vitvi01g00991.t01	transcript	Vitvi01g00991.t01	Coding	2\2	c.162C>T	p.Ala54Ala	173\2353	162\2046	54\247		WARNING_TRANSCRIPT_MULTIPLE_STOP_CODONS,T	upstream_gene_variant	MODIFIER	Gene_Vitvi01g00990.t01	Gene_Vitvi01g00990.t01	transcript	Vitvi01g00990.t01	Coding		c.-2969G>A					2969	GT:PL:DP:AD 0\2:250,0,255:39:23,16 0\2:244,0,222:29:15,14
Noirv2.chr1 12152174 . T C 221.0 . DP=85;VDB=0.912262;SGB=15.0794;RPB=0.322278;MQB=1;MQSB=1;BQB=0.914011;MQ0F=0;ICB=0.3;HOB=0.125;AC=1;AN=4;DP4=35,22,13,11;MQ=60;ANN=C	synonymous_variant	LOW	Gene_Vitvi01g00991.t01	Gene_Vitvi01g00991.t01	transcript	Vitvi01g00991.t01	Coding	3\2	c.298T>C	p.Leu100Leu	309\2353	298\2046	100\247		WARNING_TRANSCRIPT_MULTIPLE_STOP_CODONS,C	upstream_gene_variant	MODIFIER	Gene_Vitvi01g00990.t01	Gene_Vitvi01g00990.t01	transcript	Vitvi01g00990.t01	Coding		c.-3467A>G					3467	GT:PL:DP:AD 0\2:0,141,255:47:47,0 0\2:255,0,185:34:10,24
Noirv2.chr1 12152475 . T C 221.0 . DP=87;VDB=0.21385;SGB=15.7726;RPB=0.928052;MQB=1;MQSB=1;BQB=0.996942;MQ0F=0;ICB=0.3;HOB=0.125;AC=1;AN=4;DP4=31,28,14,11;MQ=60;ANN=C	splice_region_variant&intron_variant	LOW	Gene_Vitvi01g00991.t01	Gene_Vitvi01g00991.t01	transcript	Vitvi01g00991.t01	Coding	3\2	c.411-3T>C						WARNING_TRANSCRIPT_MULTIPLE_STOP_CODONS,C	upstream_gene_variant	MODIFIER	Gene_Vitvi01g00990.t01	Gene_Vitvi01g00990.t01	transcript	Vitvi01g00990.t01	Coding		c.-3768A>G					3768	GT:PL:DP:AD 0\2:255,0,255:50:25,25 0\2:0,102,255:34:34,0
Noirv2.chr1 12152559 . G A 170.0 . DP=76;VDB=0.0631957;SGB=6.07412;RPB=0.934591;MQB=1;MQSB=1;BQB=0.983931;MQ0F=0;ICB=0.3;HOB=0.125;AC=1;AN=4;DP4=31,30,5,6;MQ=60;ANN=A	splice_region_variant&intron_variant	LOW	Gene_Vitvi01g00991.t01	Gene_Vitvi01g00991.t01	transcript	Vitvi01g00991.t01	Coding	4\2	c.489+3G>A						WARNING_TRANSCRIPT_MULTIPLE_STOP_CODONS,A	upstream_gene_variant	MODIFIER	Gene_Vitvi01g00990.t01	Gene_Vitvi01g00990.t01	transcript	Vitvi01g00990.t01	Coding		c.-3852C>T					3852	GT:PL:DP:AD 0\2:0,129,255:43:43,0 0\2:204,0,255:29:18,11
Noirv2.chr1 12156917 . A G 221.0 . DP=73;VDB=0.186247;SGB=10.2282;RPB=0.187947;MQB=1;MQSB=1;BQB=0.986585;MQ0F=0;ICB=0.3;HOB=0.125;AC=1;AN=4;DP4=26,27,10,7;MQ=60;ANN=G	splice_region_variant&intron_variant	LOW	Gene_Vitvi01g00991.t01	Gene_Vitvi01g00991.t01	transcript	Vitvi01g00991.t01	Coding	6\2	c.749+4A>G						WARNING_TRANSCRIPT_MULTIPLE_STOP_CODONS,G	upstream_gene_variant	MODIFIER	Gene_Vitvi01g00992.t01	Gene_Vitvi01g00992.t01	transcript	Vitvi01g00992.t01	Coding		c.-3982A>G					3982	GT:PL:DP:AD 0\2:0,135,255:45:45,0 0\2:255,0,127:25:8,17
Noirv2.chr1 12159476 . TTCTGGTTTGTTTAGAGC T 221.0 . INDEL;IDV=10;IMF=0.5;DP=74;VDB=0.03229;SGB=5.38303;MQSB=1;MQ0F=0;ICB=0.3;HOB=0.125;AC=1;AN=4;DP4=39,25,7,3;MQ=60;ANN=T	splice_region_variant	LOW	Gene_Vitvi01g00991.t01	Gene_Vitvi01g00991.t01	transcript	Vitvi01g00991.t01	Coding	9\2	c.*282_*298delTCTGGTTTGTTTAGAGC						WARNING_TRANSCRIPT_MULTIPLE_STOP_CODONS,T	3_prime_UTR_variant	MODIFIER	Gene_Vitvi01g00991.t01	Gene_Vitvi01g00991.t01	transcript	Vitvi01g00991.t01	Coding	9\2	c.*282_*298delTCTGGTTTGTTTAGAGC					282	WARNING_TRANSCRIPT_MULTIPLE_STOP_CODONS,T	upstream_gene_variant	MODIFIER	Gene_Vitvi01g00992.t01	Gene_Vitvi01g00992.t01	transcript	Vitvi01g00992.t01	Coding		c.-1422_-1406delTCTGGTTTGTTTAGAGC					1422	,T	downstream_gene_variant	MODIFIER	Gene_Vitvi01g00991.t01	Gene_Vitvi01g00991.t01
Noirv2.chr1 12160913 . C T 111.0 . DP=49;VDB=0.605835;SGB=4.00342;RPB=0.999537;MQB=1;MQSB=1;BQB=0.974294;MQ0F=0;ICB=0.3;HOB=0.125;AC=1;AN=4;DP4=15,21,7,1;MQ=60;ANN=T	synonymous_variant	LOW	Gene_Vitvi01g00992.t01	Gene_Vitvi01g00992.t01	transcript	Vitvi01g00992.t01	Coding	1\20	c.15C>T	p.Asp5Asp	15\267	15\267	5\288		,T	downstream_gene_variant	MODIFIER	Gene_Vitvi01g00991.t01	Gene_Vitvi01g00991.t01	transcript	Vitvi01g00991.t01	Coding		c.*1718C>T					1422	WARNING_TRANSCRIPT_MULTIPLE_STOP_CODONS GT:PL:DP:AD 0\2:0,69,255:23:23,0 0\2:145,0,251:21:13,8
Noirv2.chr1 12161291 . A G 475.0 . DP=70;VDB=0.680647;SGB=-16.0769;RPB=0.637566;MQB=1;MQSB=1;BQB=0.359633;MQ0F=0;ICB=0.3;HOB=0.125;AC=3;AN=4;DP4=11,9,23,23;MQ=60;ANN=G	synonymous_variant	LOW	Gene_Vitvi01g00992.t01	Gene_Vitvi01g00992.t01	transcript	Vitvi01g00992.t01	Coding	3\20	c.177A>G	p.Glu59Glu	177\267	177\267	59\288		,G	downstream_gene_variant	MODIFIER	Gene_Vitvi01g00991.t01	Gene_Vitvi01g00991.t01	transcript	Vitvi01g00991.t01	Coding		c.*2096A>G					1800	WARNING_TRANSCRIPT_MULTIPLE_STOP_CODONS GT:PL:DP:AD 0\2:254,0,255:36:20,16 1\2:255,90,0:30:0,30
Noirv2.chr1 12161473 . C T 483.0 . DP=50;VDB=0.562212;SGB=-1.29935;MQSB=1;MQ0F=0;AC=4;AN=4;DP4=0,0,21,24;MQ=60;ANN=T	splice_region_variant&intron_variant	LOW	Gene_Vitvi01g00992.t01	Gene_Vitvi01g00992.t01	transcript	Vitvi01g00992.t01	Coding	3\2	c.276-8C>T						,T	downstream_gene_variant	MODIFIER	Gene_Vitvi01g00991.t01	Gene_Vitvi01g00991.t01	transcript	Vitvi01g00991.t01	Coding		c.*2278C>T					1982	WARNING_TRANSCRIPT_MULTIPLE_STOP_CODONS GT:PL:DP:AD 1\2:255,90,0:30:0,30 1\2:255,45,0:15:0,15
Noirv2.chr1 12161879 . C T 158.0 . DP=56;VDB=0.907304;SGB=4.69269;RPB=0.867582;MQB=1;MQSB=1;BQB=0.833227;MQ0F=0;ICB=0.3;HOB=0.125;AC=1;AN=4;DP4=26,18,4,5;MQ=60;ANN=T	splice_region_variant&intron_variant	LOW	Gene_Vitvi01g00992.t01	Gene_Vitvi01g00992.t01	transcript	Vitvi01g00992.t01	Coding	4\2	c.357-4C>T						,T	downstream_gene_variant	MODIFIER	Gene_Vitvi01g00991.t01	Gene_Vitvi01g00991.t01	transcript	Vitvi01g00991.t01	Coding		c.*2684C>T					2388	WARNING_TRANSCRIPT_MULTIPLE_STOP_CODONS GT:PL:DP:AD 0\2:192,0,177:17:8,9 0\2:0,108,255:36:36,0
Noirv2.chr1 12162155 . C T 423.0 . DP=71;VDB=0.158763;SGB=-9.93983;RPB=0.236401;MQB=1;MQSB=1;BQB=0.994717;MQ0F=0;ICB=0.5;HOB=0.5;AC=2;AN=4;DP4=16,25,16,10;MQ=60;ANN=T	synonymous_variant	LOW	Gene_Vitvi01g00992.t01	Gene_Vitvi01g00992.t01	transcript	Vitvi01g00992.t01	Coding	6\20	c.513C>T	p.Ser171Ser	513\267	513\267	171\288		,T	downstream_gene_variant	MODIFIER	Gene_Vitvi01g00991.t01	Gene_Vitvi01g00991.t01	transcript	Vitvi01g00991.t01	Coding		c.*2960C>T					2664	WARNING_TRANSCRIPT_MULTIPLE_STOP_CODONS GT:PL:DP:AD 0\2:239,0,255:30:16,14 0\2:217,0,255:37:25,12
Noirv2.chr1 12162158 . A G 221.0 . DP=70;VDB=0.177942;SGB=16.4657;RPB=0.763353;MQB=1;MQSB=1;BQB=0.695026;MQ0F=0;ICB=0.3;HOB=0.125;AC=1;AN=4;DP4=24,16,8,18;MQ=60;ANN=G	synonymous_variant	LOW	Gene_Vitvi01g00992.t01	Gene_Vitvi01g00992.t01	transcript	Vitvi01g00992.t01	Coding	6\20	c.516A>G	p.Glu172Glu	516\267	516\267	172\288		,G	downstream_gene_variant	MODIFIER	Gene_Vitvi01g00991.t01	Gene_Vitvi01g00991.t01	transcript	Vitvi01g00991.t01	Coding		c.*2963A>G					2667	WARNING_TRANSCRIPT_MULTIPLE_STOP_CODONS GT:PL:DP:AD 0\2:0,84,255:28:28,0 0\2:255,0,215:38:12,26
Noirv2.chr1 12162309 . T C 476.0 . DP=75;VDB=0.643649;SGB=-1.28512;RPB=0.920611;MQB=1;MQSB=1;BQB=0.990177;MQ0F=0;ICB=0.3;HOB=0.125;AC=3;AN=4;DP4=6,9,33,20;MQ=60;ANN=C	synonymous_variant	LOW	Gene_Vitvi01g00992.t01	Gene_Vitvi01g00992.t01	transcript	Vitvi01g00992.t01	Coding	7\20	c.564T>C	p.Asp188Asp	564\267	564\267	188\288		,C	downstream_gene_variant	MODIFIER	Gene_Vitvi01g00991.t01	Gene_Vitvi01g00991.t01	transcript	Vitvi01g00991.t01	Coding		c.*3114T>C					2818	WARNING_TRANSCRIPT_MULTIPLE_STOP_CODONS GT:PL:DP:AD 1\2:255,108,0:36:0,36 0\2:255,0,255:32:15,17
Noirv2.chr1 12162324 . C G 483.0 . DP=73;VDB=0.540175;SGB=-1.38603;MQSB=1;MQ0F=0;AC=4;AN=4;DP4=0,0,36,29;MQ=60;ANN=G	synonymous_variant	LOW	Gene_Vitvi01g00992.t01	Gene_Vitvi01g00992.t01	transcript	Vitvi01g00992.t01	Coding	7\20	c.579C>G	p.Ser193Ser	579\267	579\267	193\288		,G	downstream_gene_variant	MODIFIER	Gene_Vitvi01g00991.t01	Gene_Vitvi01g00991.t01	transcript	Vitvi01g00991.t01	Coding		c.*3129C>G					2833	WARNING_TRANSCRIPT_MULTIPLE_STOP_CODONS GT:PL:DP:AD 1\2:255,108,0:36:0,36 1\2:255,87,0:29:0,29
Noirv2.chr1 12162339 . C T 165.0 . DP=72;VDB=0.0591826;SGB=6.76576;RPB=0.283541;MQB=1;MQSB=1;BQB=0.9353;MQ0F=0;ICB=0.3;HOB=0.125;AC=1;AN=4;DP4=28,26,4,8;MQ=60;ANN=T	synonymous_variant	LOW	Gene_Vitvi01g00992.t01	Gene_Vitvi01g00992.t01	transcript	Vitvi01g00992.t01	Coding	7\20	c.594C>T	p.Asp198Asp	594\267	594\267	198\288		,T	downstream_gene_variant	MODIFIER	Gene_Vitvi01g00991.t01	Gene_Vitvi01g00991.t01	transcript	Vitvi01g00991.t01	Coding		c.*3144C>T					2848	WARNING_TRANSCRIPT_MULTIPLE_STOP_CODONS GT:PL:DP:AD 0\2:199,0,255:34:22,12 0\2:0,96,255:32:32,0
Noirv2.chr1 12162369 . C T 214.0 . DP=69;VDB=0.638929;SGB=9.53539;RPB=0.552781;MQB=1;MQSB=1;BQB=0.635749;MQ0F=0;ICB=0.3;HOB=0.125;AC=1;AN=4;DP4=19,30,7,9;MQ=60;ANN=T	splice_region_variant&intron_variant	LOW	Gene_Vitvi01g00992.t01	Gene_Vitvi01g00992.t01	transcript	Vitvi01g00992.t01	Coding	7\2	c.619+5C>T						,T	downstream_gene_variant	MODIFIER	Gene_Vitvi01g00991.t01	Gene_Vitvi01g00991.t01	transcript	Vitvi01g00991.t01	Coding		c.*3174C>T					2878	WARNING_TRANSCRIPT_MULTIPLE_STOP_CODONS GT:PL:DP:AD 0\2:248,0,255:39:23,16 0\2:0,78,255:26:26,0
Noirv2.chr1 12162370 . A G 207.0 . DP=68;VDB=0.657418;SGB=9.53539;RPB=0.597109;MQB=1;MQSB=1;BQB=0.148351;MQ0F=0;ICB=0.3;HOB=0.125;AC=1;AN=4;DP4=18,30,7,9;MQ=60;ANN=G	splice_region_variant&intron_variant	LOW	Gene_Vitvi01g00992.t01	Gene_Vitvi01g00992.t01	transcript	Vitvi01g00992.t01	Coding	7\2	c.619+6A>G						,G	downstream_gene_variant	MODIFIER	Gene_Vitvi01g00991.t01	Gene_Vitvi01g00991.t01	transcript	Vitvi01g00991.t01	Coding		c.*3175A>G					2879	WARNING_TRANSCRIPT_MULTIPLE_STOP_CODONS GT:PL:DP:AD 0\2:241,0,255:38:22,16 0\2:0,78,255:26:26,0
Noirv2.chr1 12163517 . A T 221.0 . DP=83;VDB=0.781662;SGB=12.3071;RPB=0.864379;MQB=1;MQSB=1;BQB=0.888649;MQ0F=0;ICB=0.3;HOB=0.125;AC=1;AN=4;DP4=29,33,7,13;MQ=60;ANN=T	synonymous_variant	LOW	Gene_Vitvi01g00992.t01	Gene_Vitvi01g00992.t01	transcript	Vitvi01g00992.t01	Coding	9\20	c.696A>T	p.Ser232Ser	696\267	696\267	232\288		,T	downstream_gene_variant	MODIFIER	Gene_Vitvi01g00991.t01	Gene_Vitvi01g00991.t01	transcript	Vitvi01g00991.t01	Coding		c.*4322A>T					4026	WARNING_TRANSCRIPT_MULTIPLE_STOP_CODONS GT:PL:DP:AD 0\2:0,141,255:47:47,0 0\2:255,0,255:35:15,20
Noirv2.chr1 12163726 . A G 207.0 . DP=59;VDB=0.00478706;SGB=6.07412;RPB=0.44422;MQB=1;MQSB=1;BQB=0.44422;MQ0F=0;ICB=0.3;HOB=0.125;AC=1;AN=4;DP4=21,25,5,6;MQ=60;ANN=G	synonymous_variant	LOW	Gene_Vitvi01g00992.t01	Gene_Vitvi01g00992.t01	transcript	Vitvi01g00992.t01	Coding	10\20	c.810A>G	p.Gln270Gln	810\267	810\267	270\288		,G	downstream_gene_variant	MODIFIER	Gene_Vitvi01g00991.t01	Gene_Vitvi01g00991.t01	transcript	Vitvi01g00991.t01	Coding		c.*4531A>G					4235	WARNING_TRANSCRIPT_MULTIPLE_STOP_CODONS GT:PL:DP:AD 0\2:0,108,255:36:36,0 0\2:241,0,206:21:10,11
Noirv2.chr1 12182799 . C T 174.0 . DP=59;VDB=0.834894;SGB=5.38303;RPB=0.66787;MQB=1;MQSB=1;BQB=0.866736;MQ0F=0;ICB=0.3;HOB=0.125;AC=1;AN=4;DP4=30,16,3,7;MQ=60;ANN=T	5_prime_UTR_premature_start_codon_gain_variant	LOW	Gene_Vitvi01g00993.t01	Gene_Vitvi01g00993.t01	transcript	Vitvi01g00993.t01	Coding	1\2	c.-75C>T						WARNING_TRANSCRIPT_MULTIPLE_STOP_CODONS,T	5_prime_UTR_variant	MODIFIER	Gene_Vitvi01g00993.t01	Gene_Vitvi01g00993.t01	transcript	Vitvi01g00993.t01	Coding	1\2	c.-75C>T					75	WARNING_TRANSCRIPT_MULTIPLE_STOP_CODONS GT:PL:DP:AD 0\2:0,111,255:37:37,0 0\2:208,0,203:19:9,10
Noirv2.chr1 12209297 . C T 221.0 . DP=68;VDB=0.588406;SGB=15.0794;RPB=0.797421;MQB=1;MQSB=1;BQB=0.95627;MQ0F=0;ICB=0.3;HOB=0.125;AC=1;AN=4;DP4=22,19,13,11;MQ=60;ANN=T	synonymous_variant	LOW	Gene_Vitvi01g00994.t01	Gene_Vitvi01g00994.t01	transcript	Vitvi01g00994.t01	Coding	1\2	c.1539G>A	p.Ser513Ser	2014\2171	1539\2569	513\222		GT:PL:DP:AD 0\2:0,87,255:29:29,0 0\2:255,0,210:36:12,24
Noirv2.chr1 12209306 . G A 477.0 . DP=71;VDB=0.877532;SGB=-13.3152;RPB=0.992447;MQB=1;MQSB=1;BQB=0.920757;MQ0F=0;ICB=0.5;HOB=0.5;AC=2;AN=4;DP4=15,16,20,17;MQ=60;ANN=A	synonymous_variant	LOW	Gene_Vitvi01g00994.t01	Gene_Vitvi01g00994.t01	transcript	Vitvi01g00994.t01	Coding	1\2	c.1530C>T	p.Arg510Arg	2005\2171	1530\2569	510\222		GT:PL:DP:AD 0\2:255,0,255:32:18,14 0\2:255,0,212:36:13,23
Noirv2.chr1 12209420 . T C 156.0 . DP=65;VDB=0.431287;SGB=5.38303;RPB=0.188176;MQB=1;MQSB=1;BQB=0.557295;MQ0F=0;ICB=0.3;HOB=0.125;AC=1;AN=4;DP4=15,37,4,6;MQ=60;ANN=C	synonymous_variant	LOW	Gene_Vitvi01g00994.t01	Gene_Vitvi01g00994.t01	transcript	Vitvi01g00994.t01	Coding	1\2	c.1416A>G	p.Ala472Ala	1891\2171	1416\2569	472\222		,C	downstream_gene_variant	MODIFIER	Gene_Vitvi01g00995.t01	Gene_Vitvi01g00995.t01	transcript	Vitvi01g00995.t01	Coding		c.*5183A>G					4890	WARNING_TRANSCRIPT_MULTIPLE_STOP_CODONS GT:PL:DP:AD 0\2:0,105,255:35:35,0 0\2:190,0,255:27:17,10
Noirv2.chr1 12209561 . A G 160.0 . DP=61;VDB=0.610755;SGB=5.38303;RPB=0.999557;MQB=1;MQSB=1;BQB=0.635562;MQ0F=0;ICB=0.3;HOB=0.125;AC=1;AN=4;DP4=25,25,5,5;MQ=60;ANN=G	synonymous_variant	LOW	Gene_Vitvi01g00994.t01	Gene_Vitvi01g00994.t01	transcript	Vitvi01g00994.t01	Coding	1\2	c.1275T>C	p.Ser425Ser	1750\2171	1275\2569	425\222		,G	downstream_gene_variant	MODIFIER	Gene_Vitvi01g00995.t01	Gene_Vitvi01g00995.t01	transcript	Vitvi01g00995.t01	Coding		c.*5042T>C					4749	WARNING_TRANSCRIPT_MULTIPLE_STOP_CODONS GT:PL:DP:AD 0\2:0,105,255:35:35,0 0\2:194,0,255:25:15,10
Noirv2.chr1 12209849 . C T 483.0 . DP=63;VDB=0.202986;SGB=-1.3824;MQSB=1;MQ0F=0;AC=4;AN=4;DP4=0,0,26,35;MQ=60;ANN=T	synonymous_variant	LOW	Gene_Vitvi01g00994.t01	Gene_Vitvi01g00994.t01	transcript	Vitvi01g00994.t01	Coding	1\2	c.987G>A	p.Leu329Leu	1462\2171	987\2569	329\222		,T	downstream_gene_variant	MODIFIER	Gene_Vitvi01g00995.t01	Gene_Vitvi01g00995.t01	transcript	Vitvi01g00995.t01	Coding		c.*4754G>A					4461	WARNING_TRANSCRIPT_MULTIPLE_STOP_CODONS GT:PL:DP:AD 1\2:255,111,0:37:0,37 1\2:255,72,0:24:0,24
Noirv2.chr1 12210074 . A G 221.0 . DP=56;VDB=0.816059;SGB=8.84268;RPB=0.95802;MQB=1;MQSB=1;BQB=0.966115;MQ0F=0;ICB=0.3;HOB=0.125;AC=1;AN=4;DP4=16,21,9,6;MQ=60;ANN=G	synonymous_variant	LOW	Gene_Vitvi01g00994.t01	Gene_Vitvi01g00994.t01	transcript	Vitvi01g00994.t01	Coding	1\2	c.762T>C	p.Ser254Ser	1237\2171	762\2569	254\222		,G	downstream_gene_variant	MODIFIER	Gene_Vitvi01g00995.t01	Gene_Vitvi01g00995.t01	transcript	Vitvi01g00995.t01	Coding		c.*4529T>C					4236	WARNING_TRANSCRIPT_MULTIPLE_STOP_CODONS GT:PL:DP:AD 0\2:255,0,255:32:17,15 0\2:0,60,255:20:20,0
Noirv2.chr1 12210089 . T C 140.0 . DP=56;VDB=0.745205;SGB=4.69269;RPB=0.709131;MQB=1;MQSB=1;BQB=0.0509601;MQ0F=0;ICB=0.3;HOB=0.125;AC=1;AN=4;DP4=26,18,1,8;MQ=60;ANN=C	synonymous_variant	LOW	Gene_Vitvi01g00994.t01	Gene_Vitvi01g00994.t01	transcript	Vitvi01g00994.t01	Coding	1\2	c.747A>G	p.Lys249Lys	1222\2171	747\2569	249\222		,C	downstream_gene_variant	MODIFIER	Gene_Vitvi01g00995.t01	Gene_Vitvi01g00995.t01	transcript	Vitvi01g00995.t01	Coding		c.*4514A>G					4221	WARNING_TRANSCRIPT_MULTIPLE_STOP_CODONS GT:PL:DP:AD 0\2:0,99,255:33:33,0 0\2:174,0,236:20:11,9
Noirv2.chr1 12210143 . G T 483.0 . DP=58;VDB=0.452477;SGB=-1.38587;MQSB=1;MQ0F=0;AC=4;AN=4;DP4=0,0,31,21;MQ=60;ANN=T	synonymous_variant	LOW	Gene_Vitvi01g00994.t01	Gene_Vitvi01g00994.t01	transcript	Vitvi01g00994.t01	Coding	1\2	c.693C>A	p.Thr231Thr	1168\2171	693\2569	231\222		,T	downstream_gene_variant	MODIFIER	Gene_Vitvi01g00995.t01	Gene_Vitvi01g00995.t01	transcript	Vitvi01g00995.t01	Coding		c.*4460C>A					4167	WARNING_TRANSCRIPT_MULTIPLE_STOP_CODONS GT:PL:DP:AD 1\2:255,81,0:27:0,27 1\2:255,75,0:25:0,25
Noirv2.chr1 12210242 . A G 145.0 . DP=60;VDB=0.937522;SGB=6.07412;RPB=0.71305;MQB=1;MQSB=1;BQB=0.627753;MQ0F=0;ICB=0.3;HOB=0.125;AC=1;AN=4;DP4=16,26,10,1;MQ=60;ANN=G	synonymous_variant	LOW	Gene_Vitvi01g00994.t01	Gene_Vitvi01g00994.t01	transcript	Vitvi01g00994.t01	Coding	1\2	c.594T>C	p.Ser198Ser	1069\2171	594\2569	198\222		,G	downstream_gene_variant	MODIFIER	Gene_Vitvi01g00995.t01	Gene_Vitvi01g00995.t01	transcript	Vitvi01g00995.t01	Coding		c.*4361T>C					4068	WARNING_TRANSCRIPT_MULTIPLE_STOP_CODONS GT:PL:DP:AD 0\2:0,81,255:27:27,0 0\2:179,0,255:26:15,11
Noirv2.chr1 12210259 . G A 221.0 . DP=57;VDB=0.643938;SGB=8.15014;RPB=0.951116;MQB=1;MQSB=1;BQB=0.706419;MQ0F=0;ICB=0.3;HOB=0.125;AC=1;AN=4;DP4=18,19,8,6;MQ=60;ANN=A	synonymous_variant	LOW	Gene_Vitvi01g00994.t01	Gene_Vitvi01g00994.t01	transcript	Vitvi01g00994.t01	Coding	1\2	c.577C>T	p.Leu193Leu	1052\2171	577\2569	193\222		,A	downstream_gene_variant	MODIFIER	Gene_Vitvi01g00995.t01	Gene_Vitvi01g00995.t01	transcript	Vitvi01g00995.t01	Coding		c.*4344C>T					4051	WARNING_TRANSCRIPT_MULTIPLE_STOP_CODONS GT:PL:DP:AD 0\2:0,84,255:28:28,0 0\2:255,0,181:23:9,14
Noirv2.chr1 12210266 . G C 483.0 . DP=55;VDB=0.294919;SGB=-1.38587;MQSB=1;MQ0F=0;AC=4;AN=4;DP4=0,0,26,26;MQ=60;ANN=C	synonymous_variant	LOW	Gene_Vitvi01g00994.t01	Gene_Vitvi01g00994.t01	transcript	Vitvi01g00994.t01	Coding	1\2	c.570C>G	p.Leu190Leu	1045\2171	570\2569	190\222		,C	downstream_gene_variant	MODIFIER	Gene_Vitvi01g00995.t01	Gene_Vitvi01g00995.t01	transcript	Vitvi01g00995.t01	Coding		c.*4337C>G					4044	WARNING_TRANSCRIPT_MULTIPLE_STOP_CODONS GT:PL:DP:AD 1\2:255,81,0:27:0,27 1\2:255,75,0:25:0,25
Noirv2.chr1 12210293 . T C 221.0 . DP=55;VDB=0.527393;SGB=6.76576;RPB=0.730366;MQB=1;MQSB=1;BQB=0.646563;MQ0F=0;ICB=0.3;HOB=0.125;AC=1;AN=4;DP4=20,20,6,6;MQ=60;ANN=C	synonymous_variant	LOW	Gene_Vitvi01g00994.t01	Gene_Vitvi01g00994.t01	transcript	Vitvi01g00994.t01	Coding	1\2	c.543A>G	p.Thr181Thr	1018\2171	543\2569	181\222		,C	downstream_gene_variant	MODIFIER	Gene_Vitvi01g00995.t01	Gene_Vitvi01g00995.t01	transcript	Vitvi01g00995.t01	Coding		c.*4310A>G					4017	WARNING_TRANSCRIPT_MULTIPLE_STOP_CODONS GT:PL:DP:AD 0\2:0,90,255:30:30,0 0\2:255,0,203:22:10,12
Noirv2.chr1 12210506 . C T 188.0 . DP=54;VDB=0.666096;SGB=6.76576;RPB=0.76745;MQB=1;MQSB=1;BQB=0.593932;MQ0F=0;ICB=0.3;HOB=0.125;AC=1;AN=4;DP4=18,22,7,5;MQ=60;ANN=T	synonymous_variant	LOW	Gene_Vitvi01g00994.t01	Gene_Vitvi01g00994.t01	transcript	Vitvi01g00994.t01	Coding	1\2	c.330G>A	p.Thr110Thr	805\2171	330\2569	110\222		,T	downstream_gene_variant	MODIFIER	Gene_Vitvi01g00995.t01	Gene_Vitvi01g00995.t01	transcript	Vitvi01g00995.t01	Coding		c.*4097G>A					3804	WARNING_TRANSCRIPT_MULTIPLE_STOP_CODONS GT:PL:DP:AD 0\2:222,0,255:30:18,12 0\2:0,66,255:22:22,0
Noirv2.chr1 12210569 . G A 115.0 . DP=52;VDB=0.250098;SGB=4.00342;RPB=0.619191;MQB=1;MQSB=1;BQB=0.587098;MQ0F=0;ICB=0.3;HOB=0.125;AC=1;AN=4;DP4=19,23,3,5;MQ=60;ANN=A	synonymous_variant	LOW	Gene_Vitvi01g00994.t01	Gene_Vitvi01g00994.t01	transcript	Vitvi01g00994.t01	Coding	1\2	c.267C>T	p.Ser89Ser	742\2171	267\2569	89\222		,A	downstream_gene_variant	MODIFIER	Gene_Vitvi01g00995.t01	Gene_Vitvi01g00995.t01	transcript	Vitvi01g00995.t01	Coding		c.*4034C>T					3741	WARNING_TRANSCRIPT_MULTIPLE_STOP_CODONS GT:PL:DP:AD 0\2:0,69,255:23:23,0 0\2:149,0,255:27:19,8
Noirv2.chr1 12210812 . T A 325.0 . DP=59;VDB=0.16143;SGB=-7.79186;RPB=0.493965;MQB=1;MQSB=1;BQB=0.919927;MQ0F=0;ICB=0.5;HOB=0.5;AC=2;AN=4;DP4=20,13,9,10;MQ=60;ANN=A	synonymous_variant	LOW	Gene_Vitvi01g00994.t01	Gene_Vitvi01g00994.t01	transcript	Vitvi01g00994.t01	Coding	1\2	c.24A>T	p.Ser8Ser	499\2171	24\2569	8\222		,A	downstream_gene_variant	MODIFIER	Gene_Vitvi01g00995.t01	Gene_Vitvi01g00995.t01	transcript	Vitvi01g00995.t01	Coding		c.*3791A>T					3498	WARNING_TRANSCRIPT_MULTIPLE_STOP_CODONS GT:PL:DP:AD 0\2:211,0,255:33:21,12 0\2:148,0,244:19:12,7
Noirv2.chr1 12210877 . G C 206.0 . DP=62;VDB=0.505957;SGB=6.07412;RPB=0.480993;MQB=1;MQSB=1;BQB=1;MQ0F=0;ICB=0.3;HOB=0.125;AC=1;AN=4;DP4=24,20,5,6;MQ=60;ANN=C	5_prime_UTR_premature_start_codon_gain_variant	LOW	Gene_Vitvi01g00994.t01	Gene_Vitvi01g00994.t01	transcript	Vitvi01g00994.t01	Coding	1\2	c.-42C>G						,C	5_prime_UTR_variant	MODIFIER	Gene_Vitvi01g00994.t01	Gene_Vitvi01g00994.t01	transcript	Vitvi01g00994.t01	Coding	1\2	c.-42C>G					42	,C	downstream_gene_variant	MODIFIER	Gene_Vitvi01g00995.t01	Gene_Vitvi01g00995.t01	transcript	Vitvi01g00995.t01	Coding		c.*3726C>G					3433	WARNING_TRANSCRIPT_MULTIPLE_STOP_CODONS GT:PL:DP:AD 0\2:0,114,255:38:38,0 0\2:240,0,131:17:6,11
Noirv2.chr1 12211059 . T C 221.0 . DP=64;VDB=0.615779;SGB=6.76576;RPB=0.671426;MQB=1;MQSB=1;BQB=0.761036;MQ0F=0;ICB=0.3;HOB=0.125;AC=1;AN=4;DP4=25,21,5,7;MQ=60;ANN=C	5_prime_UTR_premature_start_codon_gain_variant	LOW	Gene_Vitvi01g00994.t01	Gene_Vitvi01g00994.t01	transcript	Vitvi01g00994.t01	Coding	1\2	c.-224A>G						,C	5_prime_UTR_variant	MODIFIER	Gene_Vitvi01g00994.t01	Gene_Vitvi01g00994.t01	transcript	Vitvi01g00994.t01	Coding	1\2	c.-224A>G					224	,C	downstream_gene_variant	MODIFIER	Gene_Vitvi01g00995.t01	Gene_Vitvi01g00995.t01	transcript	Vitvi01g00995.t01	Coding		c.*3544A>G					3251	WARNING_TRANSCRIPT_MULTIPLE_STOP_CODONS GT:PL:DP:AD 0\2:0,111,255:37:37,0 0\2:255,0,188:21:9,12
Noirv2.chr1 12217068 . T C 483.0 . DP=62;VDB=0.489779;SGB=-1.38226;MQSB=0.966484;MQ0F=0;AC=4;AN=4;DP4=0,0,24,30;MQ=59;ANN=C	synonymous_variant	LOW	Gene_Vitvi01g00995.t01	Gene_Vitvi01g00995.t01	transcript	Vitvi01g00995.t01	Coding	4\2	c.1116A>G	p.Glu372Glu	1315\2348	1116\2856	372\217		WARNING_TRANSCRIPT_MULTIPLE_STOP_CODONS GT:PL:DP:AD 1\2:255,96,0:32:0,32 1\2:255,66,0:22:0,22
Noirv2.chr1 12228037 . C T 221.0 . DP=63;VDB=0.948588;SGB=8.84268;RPB=0.987882;MQB=0.99243;MQSB=0.985075;BQB=0.439602;MQ0F=0;ICB=0.3;HOB=0.125;AC=1;AN=4;DP4=31,16,7,8;MQ=59;ANN=T	synonymous_variant	LOW	Gene_Vitvi01g00996.t01	Gene_Vitvi01g00996.t01	transcript	Vitvi01g00996.t01	Coding	1\2	c.10C>T	p.Leu4Leu	10\277	10\277	4\28		GT:PL:DP:AD 0\2:0,96,255:32:32,0 0\2:255,0,251:30:15,15
Noirv2.chr1 12228042 . G A 221.0 . DP=68;VDB=0.862559;SGB=13.0002;RPB=0.844132;MQB=0.953497;MQSB=0.984963;BQB=0.697593;MQ0F=0;ICB=0.3;HOB=0.125;AC=1;AN=4;DP4=25,19,14,7;MQ=59;ANN=A	synonymous_variant	LOW	Gene_Vitvi01g00996.t01	Gene_Vitvi01g00996.t01	transcript	Vitvi01g00996.t01	Coding	1\2	c.15G>A	p.Glu5Glu	15\277	15\277	5\28		GT:PL:DP:AD 0\2:255,0,181:32:11,21 0\2:0,99,255:33:33,0
Noirv2.chr1 12228046 . C T 483.0 . DP=67;VDB=0.975592;SGB=-1.3862;MQSB=0.985463;MQ0F=0;AC=4;AN=4;DP4=0,0,38,23;MQ=59;ANN=T	synonymous_variant	LOW	Gene_Vitvi01g00996.t01	Gene_Vitvi01g00996.t01	transcript	Vitvi01g00996.t01	Coding	1\2	c.19C>T	p.Leu7Leu	19\277	19\277	7\28		GT:PL:DP:AD 1\2:255,93,0:31:0,31 1\2:255,90,0:30:0,30
Noirv2.chr1 12228051 . G A 221.0 . DP=63;VDB=0.936522;SGB=8.84268;RPB=0.957157;MQB=0.991513;MQSB=0.985245;BQB=0.980162;MQ0F=0;ICB=0.3;HOB=0.125;AC=1;AN=4;DP4=29,15,8,7;MQ=59;ANN=A	synonymous_variant	LOW	Gene_Vitvi01g00996.t01	Gene_Vitvi01g00996.t01	transcript	Vitvi01g00996.t01	Coding	1\2	c.24G>A	p.Leu8Leu	24\277	24\277	8\28		GT:PL:DP:AD 0\2:0,90,255:30:30,0 0\2:255,0,251:29:14,15
Noirv2.chr1 12228054 . A G 476.0 . DP=67;VDB=0.884997;SGB=-1.38015;RPB=0.231826;MQB=1;MQSB=1;BQB=0.919105;MQ0F=0;ICB=0.3;HOB=0.125;AC=3;AN=4;DP4=8,3,31,18;MQ=60;ANN=G	synonymous_variant	LOW	Gene_Vitvi01g00996.t01	Gene_Vitvi01g00996.t01	transcript	Vitvi01g00996.t01	Coding	1\2	c.27A>G	p.Ser9Ser	27\277	27\277	9\28		GT:PL:DP:AD 0\2:255,0,184:31:11,20 1\2:255,87,0:29:0,29
Noirv2.chr1 12228072 . G T 221.0 . DP=71;VDB=0.428107;SGB=9.53539;RPB=0.33032;MQB=0.992337;MQSB=0.986249;BQB=0.272532;MQ0F=0;ICB=0.3;HOB=0.125;AC=1;AN=4;DP4=32,16,8,8;MQ=59;ANN=T	synonymous_variant	LOW	Gene_Vitvi01g00996.t01	Gene_Vitvi01g00996.t01	transcript	Vitvi01g00996.t01	Coding	1\2	c.45G>T	p.Arg15Arg	45\277	45\277	15\28		GT:PL:DP:AD 0\2:0,105,255:35:35,0 0\2:255,0,228:29:13,16
Noirv2.chr1 12228081 . C T 360.0 . DP=61;VDB=0.202536;SGB=-10.5535;RPB=0.40991;MQB=0.974027;MQSB=0.984335;BQB=0.928535;MQ0F=0;ICB=0.5;HOB=0.5;AC=2;AN=4;DP4=15,13,20,8;MQ=59;ANN=T	synonymous_variant	LOW	Gene_Vitvi01g00996.t01	Gene_Vitvi01g00996.t01	transcript	Vitvi01g00996.t01	Coding	1\2	c.54C>T	p.Thr18Thr	54\277	54\277	18\28		GT:PL:DP:AD 0\2:255,0,198:31:11,20 0\2:138,0,255:25:17,8
Noirv2.chr1 12228111 . G A 221.0 . DP=65;VDB=0.120057;SGB=10.2282;RPB=0.998214;MQB=0.989514;MQSB=0.976551;BQB=0.684206;MQ0F=0;ICB=0.3;HOB=0.125;AC=1;AN=4;DP4=21,20,7,10;MQ=59;ANN=A	synonymous_variant	LOW	Gene_Vitvi01g00996.t01	Gene_Vitvi01g00996.t01	transcript	Vitvi01g00996.t01	Coding	1\2	c.84G>A	p.Arg28Arg	84\277	84\277	28\28		GT:PL:DP:AD 0\2:0,105,255:35:35,0 0\2:255,0,120:23:6,17
Noirv2.chr1 12228114 . G A 297.0 . DP=63;VDB=0.561843;SGB=-10.2467;RPB=0.11943;MQB=0.919087;MQSB=0.913636;BQB=0.0396409;MQ0F=0;ICB=0.5;HOB=0.5;AC=2;AN=4;DP4=12,20,16,11;MQ=59;ANN=A	synonymous_variant	LOW	Gene_Vitvi01g00996.t01	Gene_Vitvi01g00996.t01	transcript	Vitvi01g00996.t01	Coding	1\2	c.87G>A	p.Gly29Gly	87\277	87\277	29\28		GT:PL:DP:AD 0\2:255,0,225:36:15,21 0\2:75,0,255:23:17,6
Noirv2.chr1 12228117 . T C 314.0 . DP=63;VDB=0.522269;SGB=-14.8495;RPB=0.953197;MQB=0.960332;MQSB=0.919087;BQB=0.743521;MQ0F=0;ICB=0.3;HOB=0.125;AC=3;AN=4;DP4=7,10,20,22;MQ=59;ANN=C	synonymous_variant	LOW	Gene_Vitvi01g00996.t01	Gene_Vitvi01g00996.t01	transcript	Vitvi01g00996.t01	Coding	1\2	c.90T>C	p.Ser30Ser	90\277	90\277	30\28		GT:PL:DP:AD 1\2:255,108,0:36:0,36 0\2:93,0,255:23:17,6
Noirv2.chr1 12228147 . T C 483.0 . DP=55;VDB=0.00890054;SGB=-1.37307;MQSB=0.878421;MQ0F=0;AC=4;AN=4;DP4=0,0,21,32;MQ=59;ANN=C	synonymous_variant	LOW	Gene_Vitvi01g00996.t01	Gene_Vitvi01g00996.t01	transcript	Vitvi01g00996.t01	Coding	1\2	c.120T>C	p.Ser40Ser	120\277	120\277	40\28		GT:PL:DP:AD 1\2:255,99,0:33:0,33 1\2:255,60,0:20:0,20
Noirv2.chr1 12228150 . G A 304.0 . DP=55;VDB=0.0641844;SGB=-13.6221;RPB=0.202596;MQB=0.760239;MQSB=0.878421;BQB=0.0523856;MQ0F=0;ICB=0.3;HOB=0.125;AC=3;AN=4;DP4=5,10,16,22;MQ=59;ANN=A	synonymous_variant	LOW	Gene_Vitvi01g00996.t01	Gene_Vitvi01g00996.t01	transcript	Vitvi01g00996.t01	Coding	1\2	c.123G>A	p.Ser41Ser	123\277	123\277	41\28		GT:PL:DP:AD 1\2:255,99,0:33:0,33 0\2:83,0,255:20:15,5
Noirv2.chr1 12228153 . G A 278.0 . DP=56;VDB=0.136516;SGB=-13.6221;RPB=0.188646;MQB=0.760239;MQSB=0.89948;BQB=0.0161352;MQ0F=0;ICB=0.3;HOB=0.125;AC=3;AN=4;DP4=5,10,17,21;MQ=59;ANN=A	synonymous_variant	LOW	Gene_Vitvi01g00996.t01	Gene_Vitvi01g00996.t01	transcript	Vitvi01g00996.t01	Coding	1\2	c.126G>A	p.Val42Val	126\277	126\277	42\28		GT:PL:DP:AD 1\2:255,102,0:34:0,34 0\2:58,0,255:19:15,4
Noirv2.chr1 12228177 . C T 349.0 . DP=61;VDB=0.595588;SGB=1.80226;RPB=0.404622;MQB=0.683102;MQSB=0.909675;BQB=0.371341;MQ0F=0;ICB=0.3;HOB=0.125;AC=3;AN=4;DP4=4,10,22,23;MQ=59;ANN=T	synonymous_variant	LOW	Gene_Vitvi01g00996.t01	Gene_Vitvi01g00996.t01	transcript	Vitvi01g00996.t01	Coding	1\2	c.150C>T	p.Ser50Ser	150\277	150\277	50\28		GT:PL:DP:AD 1\2:255,114,0:38:0,38 0\2:128,0,251:21:14,7
Noirv2.chr1 12246146 . G C 164.0 . DP=54;VDB=0.864626;SGB=6.07412;RPB=0.700135;MQB=1;MQSB=1;BQB=0.880536;MQ0F=0;ICB=0.3;HOB=0.125;AC=1;AN=4;DP4=20,22,7,4;MQ=60;ANN=C	splice_region_variant&intron_variant	LOW	Gene_Vitvi01g00997.t01	Gene_Vitvi01g00997.t01	transcript	Vitvi01g00997.t01	Coding	1\2	c.207+6G>C						GT:PL:DP:AD 0\2:198,0,255:29:18,11 0\2:0,72,255:24:24,0
Noirv2.chr1 12246340 . G A 483.0 . DP=78;VDB=0.187451;SGB=-1.38617;MQSB=1;MQ0F=0;AC=4;AN=4;DP4=0,0,46,26;MQ=60;ANN=A	synonymous_variant	LOW	Gene_Vitvi01g00997.t01	Gene_Vitvi01g00997.t01	transcript	Vitvi01g00997.t01	Coding	2\20	c.216G>A	p.Leu72Leu	373\2500	216\293	72\230		GT:PL:DP:AD 1\2:255,120,0:40:0,40 1\2:255,96,0:32:0,32
Noirv2.chr1 12247653 . T C 187.0 . DP=61;VDB=0.725824;SGB=6.07412;RPB=0.96218;MQB=1;MQSB=1;BQB=1;MQ0F=0;ICB=0.3;HOB=0.125;AC=1;AN=4;DP4=32,15,6,5;MQ=60;ANN=C	splice_region_variant&synonymous_variant	LOW	Gene_Vitvi01g00997.t01	Gene_Vitvi01g00997.t01	transcript	Vitvi01g00997.t01	Coding	5\20	c.475T>C	p.Leu159Leu	632\2500	475\293	159\230		GT:PL:DP:AD 0\2:0,96,255:32:32,0 0\2:221,0,255:26:15,11
Noirv2.chr1 12252152 . T C 477.0 . DP=72;VDB=0.0728946;SGB=-13.0084;RPB=0.985314;MQB=1;MQSB=1;BQB=0.952102;MQ0F=0;ICB=0.5;HOB=0.5;AC=2;AN=4;DP4=16,16,20,16;MQ=60;ANN=C	synonymous_variant	LOW	Gene_Vitvi01g00997.t01	Gene_Vitvi01g00997.t01	transcript	Vitvi01g00997.t01	Coding	9\20	c.864T>C	p.Tyr288Tyr	1021\2500	864\293	288\230		,C	downstream_gene_variant	MODIFIER	Gene_Vitvi01g00998.t01	Gene_Vitvi01g00998.t01	transcript	Vitvi01g00998.t01	Coding		c.*1163A>G					1163	GT:PL:DP:AD 0\2:255,0,255:40:21,19 0\2:255,0,220:28:11,17
Noirv2.chr1 12252173 . T A 483.0 . DP=75;VDB=0.325045;SGB=-1.38627;MQSB=1;MQ0F=0;AC=4;AN=4;DP4=0,0,41,32;MQ=60;ANN=A	synonymous_variant	LOW	Gene_Vitvi01g00997.t01	Gene_Vitvi01g00997.t01	transcript	Vitvi01g00997.t01	Coding	9\20	c.885T>A	p.Leu295Leu	1042\2500	885\293	295\230		,A	downstream_gene_variant	MODIFIER	Gene_Vitvi01g00998.t01	Gene_Vitvi01g00998.t01	transcript	Vitvi01g00998.t01	Coding		c.*1142A>T					1142	GT:PL:DP:AD 1\2:255,114,0:38:0,38 1\2:255,105,0:35:0,35
Noirv2.chr1 12252212 . A G 442.0 . DP=81;VDB=0.241353;SGB=-13.0084;RPB=0.652566;MQB=1;MQSB=1;BQB=0.939854;MQ0F=0;ICB=0.5;HOB=0.5;AC=2;AN=4;DP4=22,19,18,18;MQ=60;ANN=G	synonymous_variant	LOW	Gene_Vitvi01g00997.t01	Gene_Vitvi01g00997.t01	transcript	Vitvi01g00997.t01	Coding	9\20	c.924A>G	p.Val308Val	1081\2500	924\293	308\230		,G	downstream_gene_variant	MODIFIER	Gene_Vitvi01g00998.t01	Gene_Vitvi01g00998.t01	transcript	Vitvi01g00998.t01	Coding		c.*1103T>C					1103	GT:PL:DP:AD 0\2:255,0,255:43:20,23 0\2:220,0,255:34:21,13
Noirv2.chr1 12253328 . G A 221.0 . DP=56;VDB=0.00439698;SGB=10.9211;RPB=0.296316;MQB=1;MQSB=1;BQB=0.584256;MQ0F=0;ICB=0.3;HOB=0.125;AC=1;AN=4;DP4=16,20,8,10;MQ=60;ANN=A	splice_region_variant&intron_variant	LOW	Gene_Vitvi01g00998.t01	Gene_Vitvi01g00998.t01	transcript	Vitvi01g00998.t01	Coding	3\2	c.78-7C>T						,A	downstream_gene_variant	MODIFIER	Gene_Vitvi01g00997.t01	Gene_Vitvi01g00997.t01	transcript	Vitvi01g00997.t01	Coding		c.*439G>A					89	GT:PL:DP:AD 0\2:255,0,207:28:10,18 0\2:0,78,255:26:26,0
Noirv2.chr1 12257724 . G A 216.0 . DP=28;VDB=0.0639287;SGB=7.4578;RPB=0.774988;MQB=0.556581;MQSB=0.601415;BQB=0.528945;MQ0F=0;ICB=0.5;HOB=0.5;AC=2;AN=4;DP4=5,10,4,9;MQ=58;ANN=A	synonymous_variant	LOW	Gene_Vitvi01g00998.t01	Gene_Vitvi01g00998.t01	transcript	Vitvi01g00998.t01	Coding	1\2	c.36C>T	p.Thr12Thr	36\24	36\24	12\27		,A	downstream_gene_variant	MODIFIER	Gene_Vitvi01g00997.t01	Gene_Vitvi01g00997.t01	transcript	Vitvi01g00997.t01	Coding		c.*4835G>A					4485	GT:PL:DP:AD 1\2:255,39,0:13:0,13 0\2:0,45,255:15:15,0
Noirv2.chr1 12257730 . C T 216.0 . DP=27;VDB=0.00654531;SGB=6.76576;RPB=0.71275;MQB=0.527181;MQSB=0.539407;BQB=0.328758;MQ0F=0;ICB=0.5;HOB=0.5;AC=2;AN=4;DP4=4,10,4,8;MQ=58;ANN=T	synonymous_variant	LOW	Gene_Vitvi01g00998.t01	Gene_Vitvi01g00998.t01	transcript	Vitvi01g00998.t01	Coding	1\2	c.30G>A	p.Arg10Arg	30\24	30\24	10\27		,T	downstream_gene_variant	MODIFIER	Gene_Vitvi01g00997.t01	Gene_Vitvi01g00997.t01	transcript	Vitvi01g00997.t01	Coding		c.*4841C>T					4491	GT:PL:DP:AD 1\2:255,36,0:12:0,12 0\2:0,42,255:14:14,0
Noirv2.chr1 12267356 . G A 163.0 . DP=47;VDB=0.46761;SGB=6.07412;RPB=0.888127;MQB=1;MQSB=1;BQB=0.972399;MQ0F=0;ICB=0.3;HOB=0.125;AC=1;AN=4;DP4=19,13,8,3;MQ=60;ANN=A	synonymous_variant	LOW	Gene_Vitvi01g00999.t01	Gene_Vitvi01g00999.t01	transcript	Vitvi01g00999.t01	Coding	3\2	c.612G>A	p.Leu204Leu	613\2206	612\2205	204\200		WARNING_TRANSCRIPT_MULTIPLE_STOP_CODONS GT:PL:DP:AD 0\2:197,0,255:28:17,11 0\2:0,45,255:15:15,0
Noirv2.chr1 12275921 . C A 110.0 . DP=57;VDB=0.281503;SGB=6.07412;RPB=0.329543;MQB=0.899885;MQSB=0.996994;BQB=0.754499;MQ0F=0;ICB=0.3;HOB=0.125;AC=1;AN=4;DP4=5,36,0,11;MQ=59;ANN=A	synonymous_variant	LOW	Gene_Vitvi01g01000.t01	Gene_Vitvi01g01000.t01	transcript	Vitvi01g01000.t01	Coding	1\2	c.15G>T	p.Gly5Gly	15\286	15\286	5\21		,A	upstream_gene_variant	MODIFIER	Gene_Vitvi01g01001.t01	Gene_Vitvi01g01001.t01	transcript	Vitvi01g01001.t01	Coding		c.-1189C>A					1189	GT:PL:DP:AD 0\2:0,84,255:28:28,0 0\2:144,0,210:24:13,11
Noirv2.chr1 12277302 . A G 31.72 . DP=6;VDB=0.0532881;SGB=-2.83311;RPB=0.28717;MQB=0.28717;MQSB=0.875;BQB=0.861511;MQ0F=0;ICB=0.5;HOB=0.5;AC=2;AN=4;DP4=0,3,2,1;MQ=24;ANN=G	synonymous_variant	LOW	Gene_Vitvi01g01001.t01	Gene_Vitvi01g01001.t01	transcript	Vitvi01g01001.t01	Coding	2\2	c.24A>G	p.Lys8Lys	24\223	24\223	8\20		,G	upstream_gene_variant	MODIFIER	Gene_Vitvi01g01000.t01	Gene_Vitvi01g01000.t01	transcript	Vitvi01g01000.t01	Coding		c.-1367T>C					1367	GT:PL:DP:AD 0\2:35,0,18:4:2,2 0\2:30,0,12:2:1,1
Noirv2.chr1 12294273 . T C 143.0 . DP=38;VDB=0.00131656;SGB=5.38303;RPB=0.179232;MQB=1;MQSB=1;BQB=0.835062;MQ0F=0;ICB=0.5;HOB=0.5;AC=2;AN=4;DP4=15,11,0,10;MQ=59;ANN=C	splice_region_variant&intron_variant	LOW	Gene_Vitvi01g01002.t01	Gene_Vitvi01g01002.t01	transcript	Vitvi01g01002.t01	Coding	4\2	c.64+4T>C						GT:PL:DP:AD 0\2:0,78,255:26:26,0 1\2:182,30,0:10:0,10
Noirv2.chr1 12301419 . C T 175.0 . DP=21;VDB=0.947131;SGB=4.69269;RPB=0.948064;MQB=0.00551197;MQSB=0.6435;BQB=0.544711;MQ0F=0;ICB=1;HOB=0.5;AC=1;AN=2;DP4=5,5,4,5;MQ=52;ANN=T	synonymous_variant	LOW	Gene_Vitvi01g01002.t01	Gene_Vitvi01g01002.t01	transcript	Vitvi01g01002.t01	Coding	5\2	c.93C>T	p.Leu31Leu	93\247	93\247	31\28		GT:PL:DP:AD 0\2:205,0,210:19:10,9 ./.:0,0,0:0:0,0
Noirv2.chr1 12305246 . C T 222.0 . DP=38;VDB=0.224409;SGB=10.2282;RPB=0.88791;MQB=0.995829;MQSB=0.344456;BQB=0.566156;MQ0F=0;ICB=0.3;HOB=0.125;AC=1;AN=4;DP4=4,16,8,9;MQ=43;ANN=T	splice_region_variant&synonymous_variant	LOW	Gene_Vitvi01g01002.t01	Gene_Vitvi01g01002.t01	transcript	Vitvi01g01002.t01	Coding	6\2	c.102C>T	p.Ser34Ser	102\247	102\247	34\28		,T	upstream_gene_variant	MODIFIER	Gene_Vitvi01g01003.t01	Gene_Vitvi01g01003.t01	transcript	Vitvi01g01003.t01	Coding		c.-3852C>T					3852	GT:PL:DP:AD 0\2:255,0,255:35:18,17 0\2:0,6,35:2:2,0
Noirv2.chr1 12305258 . A G 300.0 . DP=37;VDB=0.142882;SGB=2.80959;MQSB=0.491841;MQ0F=0;AC=4;AN=4;DP4=0,0,12,24;MQ=44;ANN=G	splice_region_variant&intron_variant	LOW	Gene_Vitvi01g01002.t01	Gene_Vitvi01g01002.t01	transcript	Vitvi01g01002.t01	Coding	6\2	c.107+7A>G						,G	upstream_gene_variant	MODIFIER	Gene_Vitvi01g01003.t01	Gene_Vitvi01g01003.t01	transcript	Vitvi01g01003.t01	Coding		c.-3840A>G					3840	GT:PL:DP:AD 1\2:255,99,0:33:0,33 1\2:72,9,0:3:0,3
Noirv2.chr1 12305722 . C T 149.0 . DP=41;VDB=0.00429645;SGB=3.31571;RPB=0.147139;MQB=0.00873776;MQSB=0.330181;BQB=0.662363;MQ0F=0;ICB=0.5;HOB=0.5;AC=2;AN=4;DP4=12,21,2,5;MQ=52;ANN=T	splice_region_variant&intron_variant	LOW	Gene_Vitvi01g01002.t01	Gene_Vitvi01g01002.t01	transcript	Vitvi01g01002.t01	Coding	6\2	c.108-4C>T						,T	upstream_gene_variant	MODIFIER	Gene_Vitvi01g01003.t01	Gene_Vitvi01g01003.t01	transcript	Vitvi01g01003.t01	Coding		c.-3376C>T					3376	GT:PL:DP:AD 0\2:0,99,255:33:33,0 1\2:188,21,0:7:0,7
Noirv2.chr1 12305753 . T C 126.0 . DP=40;VDB=0.0146107;SGB=3.31571;RPB=0.50373;MQB=0.00208825;MQSB=0.876998;BQB=0.701706;MQ0F=0;ICB=0.3;HOB=0.125;AC=1;AN=4;DP4=11,21,3,4;MQ=54;ANN=C	synonymous_variant	LOW	Gene_Vitvi01g01002.t01	Gene_Vitvi01g01002.t01	transcript	Vitvi01g01002.t01	Coding	7\2	c.135T>C	p.Cys45Cys	135\247	135\247	45\28		,C	upstream_gene_variant	MODIFIER	Gene_Vitvi01g01003.t01	Gene_Vitvi01g01003.t01	transcript	Vitvi01g01003.t01	Coding		c.-3345T>C					3345	GT:PL:DP:AD 0\2:0,93,255:31:31,0 0\2:161,0,13:8:1,7
Noirv2.chr1 12305759 . G A 128.0 . DP=42;VDB=0.00621241;SGB=-4.40924;RPB=0.693641;MQB=0.00112736;MQSB=0.824181;BQB=0.457771;MQ0F=0;ICB=0.3;HOB=0.125;AC=1;AN=4;DP4=13,20,4,4;MQ=54;ANN=A	synonymous_variant	LOW	Gene_Vitvi01g01002.t01	Gene_Vitvi01g01002.t01	transcript	Vitvi01g01002.t01	Coding	7\2	c.141G>A	p.Leu47Leu	141\247	141\247	47\28		,A	upstream_gene_variant	MODIFIER	Gene_Vitvi01g01003.t01	Gene_Vitvi01g01003.t01	transcript	Vitvi01g01003.t01	Coding		c.-3339G>A					3339	GT:PL:DP:AD 0\2:0,96,255:33:32,0 0\2:163,0,13:8:1,7
Noirv2.chr1 12309124 . T C 257.0 . DP=66;VDB=0.0288127;SGB=-13.3152;RPB=0.306289;MQB=0.220464;MQSB=0.607955;BQB=0.986118;MQ0F=0;ICB=0.5;HOB=0.5;AC=2;AN=4;DP4=13,7,15,22;MQ=21;ANN=C	synonymous_variant	LOW	Gene_Vitvi01g01003.t01	Gene_Vitvi01g01003.t01	transcript	Vitvi01g01003.t01	Coding	1\2	c.27T>C	p.Asp9Asp	27\217	27\217	9\28		,C	downstream_gene_variant	MODIFIER	Gene_Vitvi01g01002.t01	Gene_Vitvi01g01002.t01	transcript	Vitvi01g01002.t01	Coding		c.*3359T>C					3359	GT:PL:DP:AD 0\2:137,0,139:33:14,19 0\2:153,0,68:24:6,18
Noirv2.chr1 12310756 . C CA 46.2643 . INDEL;IDV=12;IMF=0.75;DP=20;VDB=0.198269;SGB=6.76576;MQ0F=0;ICB=0.3;HOB=0.125;AC=1;AN=4;DP4=8,0,12,0;MQ=45;ANN=CA	splice_region_variant&intron_variant	LOW	Gene_Vitvi01g01003.t01	Gene_Vitvi01g01003.t01	transcript	Vitvi01g01003.t01	Coding	2\2	c.67-8_67-7insA						,CA	downstream_gene_variant	MODIFIER	Gene_Vitvi01g01002.t01	Gene_Vitvi01g01002.t01	transcript	Vitvi01g01002.t01	Coding		c.*4991_*4992insA					4992	GT:PL:DP:AD 0\2:80,0,59:16:4,12 0\2:0,12,86:4:4,0
Noirv2.chr1 12310757 . G A 69.0 . DP=20;VDB=0.66971;SGB=1.27626;RPB=0.248092;MQB=0.62023;BQB=0.992367;MQ0F=0;ICB=0.5;HOB=0.5;AC=2;AN=4;DP4=4,0,4,0;MQ=45;ANN=A	splice_region_variant&intron_variant	LOW	Gene_Vitvi01g01003.t01	Gene_Vitvi01g01003.t01	transcript	Vitvi01g01003.t01	Coding	2\2	c.67-7G>A						,A	downstream_gene_variant	MODIFIER	Gene_Vitvi01g01002.t01	Gene_Vitvi01g01002.t01	transcript	Vitvi01g01002.t01	Coding		c.*4992G>A					4992	GT:PL:DP:AD 1\2:107,12,0:4:0,4 0\2:0,12,113:4:4,0
Noirv2.chr1 12310766 . C T 134.0 . DP=21;VDB=0.0921838;SGB=7.4578;RPB=0.70694;MQB=0.999345;BQB=0.297544;MQ0F=0;ICB=0.3;HOB=0.125;AC=1;AN=4;DP4=8,0,13,0;MQ=45;ANN=T	splice_region_variant&synonymous_variant	LOW	Gene_Vitvi01g01003.t01	Gene_Vitvi01g01003.t01	transcript	Vitvi01g01003.t01	Coding	3\2	c.69C>T	p.Phe23Phe	69\217	69\217	23\28		GT:PL:DP:AD 0\2:168,0,61:17:4,13 0\2:0,12,116:4:4,0
Noirv2.chr1 12311745 . A G 92.0 . DP=6;VDB=0.377852;SGB=1.97062;MQSB=1;MQ0F=0;AC=2;AN=2;DP4=0,0,5,1;MQ=38;ANN=G	splice_region_variant&intron_variant	LOW	Gene_Vitvi01g01003.t01	Gene_Vitvi01g01003.t01	transcript	Vitvi01g01003.t01	Coding	3\2	c.72-8A>G						GT:PL:DP:AD ./.:0,0,0:0:0,0 1\2:140,36,21:6:0,5
Noirv2.chr1 12311747 . C T 136.0 . DP=7;VDB=0.525314;SGB=2.55596;MQSB=1;MQ0F=0;AC=2;AN=2;DP4=0,0,6,1;MQ=41;ANN=T	splice_region_variant&intron_variant	LOW	Gene_Vitvi01g01003.t01	Gene_Vitvi01g01003.t01	transcript	Vitvi01g01003.t01	Coding	3\2	c.72-6C>T						GT:PL:DP:AD ./.:0,0,0:0:0,0 1\2:163,21,0:7:0,7
Noirv2.chr1 12317177 . T C 22.8658 . DP=7;VDB=0.251321;SGB=-2.83311;RPB=0.810265;MQB=0.810265;MQSB=0.607698;BQB=0.607698;MQ0F=0;ICB=0.3;HOB=0.125;AC=3;AN=4;DP4=3,1,1,2;MQ=27;ANN=C	splice_region_variant&intron_variant	LOW	Gene_Vitvi01g01004.t01	Gene_Vitvi01g01004.t01	transcript	Vitvi01g01004.t01	Coding	2\2	c.23-5A>G						,C	downstream_gene_variant	MODIFIER	Gene_Vitvi01g01003.t01	Gene_Vitvi01g01003.t01	transcript	Vitvi01g01003.t01	Coding		c.*780T>C					780	,C	downstream_gene_variant	MODIFIER	Gene_Vitvi01g01005.t01	Gene_Vitvi01g01005.t01	transcript	Vitvi01g01005.t01	Coding		c.*4168A>G					4168	GT:PL:DP:AD 0\2:22,0,82:5:4,1 1\2:34,6,0:2:0,2
Noirv2.chr1 12321369 . A G 288.0 . DP=21;VDB=0.0165997;SGB=0.552633;MQSB=0.999286;MQ0F=0;AC=4;AN=4;DP4=0,0,10,10;MQ=45;ANN=G	synonymous_variant	LOW	Gene_Vitvi01g01005.t01	Gene_Vitvi01g01005.t01	transcript	Vitvi01g01005.t01	Coding	4\2	c.588T>C	p.Leu196Leu	588\212	588\212	196\203		,G	upstream_gene_variant	MODIFIER	Gene_Vitvi01g01004.t01	Gene_Vitvi01g01004.t01	transcript	Vitvi01g01004.t01	Coding		c.-2215T>C					2215	,G	downstream_gene_variant	MODIFIER	Gene_Vitvi01g01003.t01	Gene_Vitvi01g01003.t01	transcript	Vitvi01g01003.t01	Coding		c.*4972A>G					4972	GT:PL:DP:AD 1\2:255,54,0:18:0,18 1\2:60,6,0:2:0,2
Noirv2.chr1 12321372 . G A 41.2404 . DP=21;VDB=0.366751;SGB=1.27626;RPB=0.23541;MQB=0.972484;MQSB=0.999286;BQB=0.990006;MQ0F=0;ICB=0.3;HOB=0.125;AC=1;AN=4;DP4=9,7,1,3;MQ=45;ANN=A	synonymous_variant	LOW	Gene_Vitvi01g01005.t01	Gene_Vitvi01g01005.t01	transcript	Vitvi01g01005.t01	Coding	4\2	c.585C>T	p.Leu195Leu	585\212	585\212	195\203		,A	upstream_gene_variant	MODIFIER	Gene_Vitvi01g01004.t01	Gene_Vitvi01g01004.t01	transcript	Vitvi01g01004.t01	Coding		c.-2218C>T					2218	,A	downstream_gene_variant	MODIFIER	Gene_Vitvi01g01003.t01	Gene_Vitvi01g01003.t01	transcript	Vitvi01g01003.t01	Coding		c.*4975G>A					4975	GT:PL:DP:AD 0\2:76,0,255:18:14,4 0\2:0,6,60:2:2,0
Noirv2.chr1 12321375 . A C,G 186.0 . DP=22;VDB=0.0297528;SGB=9.76429;RPB=0.611111;MQB=0.361111;MQSB=0.999286;BQB=0.0833333;MQ0F=0;ICB=1;HOB=0;AC=1,1;AN=4;DP4=1,1,9,9;MQ=45;ANN=C	synonymous_variant	LOW	Gene_Vitvi01g01005.t01	Gene_Vitvi01g01005.t01	transcript	Vitvi01g01005.t01	Coding	4\2	c.582T>G	p.Ala194Ala	582\212	582\212	194\203		,G	synonymous_variant	LOW	Gene_Vitvi01g01005.t01	Gene_Vitvi01g01005.t01	transcript	Vitvi01g01005.t01	Coding	4\2	c.582T>C	p.Ala194Ala	582\212	582\212	194\203		,C	upstream_gene_variant	MODIFIER	Gene_Vitvi01g01004.t01	Gene_Vitvi01g01004.t01	transcript	Vitvi01g01004.t01	Coding		c.-2221T>G					2221	,G	upstream_gene_variant	MODIFIER	Gene_Vitvi01g01004.t01	Gene_Vitvi01g01004.t01
Noirv2.chr1 12321378 . G A 221.0 . DP=24;VDB=0.0606881;SGB=8.15014;RPB=0.820031;MQB=0.167677;MQSB=0.962374;BQB=0.715111;MQ0F=0;ICB=0.3;HOB=0.125;AC=1;AN=4;DP4=3,6,8,6;MQ=47;ANN=A	synonymous_variant	LOW	Gene_Vitvi01g01005.t01	Gene_Vitvi01g01005.t01	transcript	Vitvi01g01005.t01	Coding	4\2	c.579C>T	p.Ala193Ala	579\212	579\212	193\203		,A	upstream_gene_variant	MODIFIER	Gene_Vitvi01g01004.t01	Gene_Vitvi01g01004.t01	transcript	Vitvi01g01004.t01	Coding		c.-2224C>T					2224	,A	downstream_gene_variant	MODIFIER	Gene_Vitvi01g01003.t01	Gene_Vitvi01g01003.t01	transcript	Vitvi01g01003.t01	Coding		c.*4981G>A					4981	GT:PL:DP:AD 0\2:254,0,142:21:7,14 0\2:0,6,55:2:2,0
Noirv2.chr1 12321402 . A G 423.0 . DP=36;VDB=0.0019468;SGB=-0.623078;MQSB=0.688182;MQ0F=0;AC=4;AN=4;DP4=0,0,16,17;MQ=46;ANN=G	synonymous_variant	LOW	Gene_Vitvi01g01005.t01	Gene_Vitvi01g01005.t01	transcript	Vitvi01g01005.t01	Coding	4\2	c.555T>C	p.Leu185Leu	555\212	555\212	185\203		,G	upstream_gene_variant	MODIFIER	Gene_Vitvi01g01004.t01	Gene_Vitvi01g01004.t01	transcript	Vitvi01g01004.t01	Coding		c.-2248T>C					2248	GT:PL:DP:AD 1\2:255,75,0:25:0,25 1\2:195,24,0:8:0,8
Noirv2.chr1 12321405 . G A 112.0 . DP=35;VDB=0.0769344;SGB=2.63044;RPB=0.182753;MQB=0.0588165;MQSB=0.688182;BQB=0.973134;MQ0F=0;ICB=0.3;HOB=0.125;AC=1;AN=4;DP4=12,15,4,2;MQ=46;ANN=A	synonymous_variant	LOW	Gene_Vitvi01g01005.t01	Gene_Vitvi01g01005.t01	transcript	Vitvi01g01005.t01	Coding	4\2	c.552C>T	p.Thr184Thr	552\212	552\212	184\203		,A	upstream_gene_variant	MODIFIER	Gene_Vitvi01g01004.t01	Gene_Vitvi01g01004.t01	transcript	Vitvi01g01004.t01	Coding		c.-2251C>T					2251	GT:PL:DP:AD 0\2:0,75,255:25:25,0 0\2:146,0,46:8:2,6
Noirv2.chr1 12321435 . A G 106.0 . DP=55;VDB=0.219617;SGB=3.31571;RPB=0.560699;MQB=0.0327789;MQSB=0.328363;BQB=0.722205;MQ0F=0;ICB=0.3;HOB=0.125;AC=1;AN=4;DP4=16,24,6,1;MQ=49;ANN=G	synonymous_variant	LOW	Gene_Vitvi01g01005.t01	Gene_Vitvi01g01005.t01	transcript	Vitvi01g01005.t01	Coding	4\2	c.522T>C	p.Ser174Ser	522\212	522\212	174\203		,G	upstream_gene_variant	MODIFIER	Gene_Vitvi01g01004.t01	Gene_Vitvi01g01004.t01	transcript	Vitvi01g01004.t01	Coding		c.-2281T>C					2281	GT:PL:DP:AD 0\2:0,102,255:34:34,0 0\2:140,0,139:13:6,7
Noirv2.chr1 12321447 . G T 221.0 . DP=55;VDB=0.39107;SGB=13.0002;RPB=0.49885;MQB=0.646706;MQSB=0.727267;BQB=0.942554;MQ0F=0;ICB=0.3;HOB=0.125;AC=1;AN=4;DP4=15,14,8,13;MQ=48;ANN=T	synonymous_variant	LOW	Gene_Vitvi01g01005.t01	Gene_Vitvi01g01005.t01	transcript	Vitvi01g01005.t01	Coding	4\2	c.510C>A	p.Ser170Ser	510\212	510\212	170\203		,T	upstream_gene_variant	MODIFIER	Gene_Vitvi01g01004.t01	Gene_Vitvi01g01004.t01	transcript	Vitvi01g01004.t01	Coding		c.-2293C>A					2293	GT:PL:DP:AD 0\2:255,0,241:35:14,21 0\2:0,45,255:15:15,0
Noirv2.chr1 12321468 . G A 221.0 . DP=58;VDB=0.90518;SGB=14.3863;RPB=0.114558;MQB=0.477572;MQSB=0.35618;BQB=0.492883;MQ0F=0;ICB=0.3;HOB=0.125;AC=1;AN=4;DP4=16,15,10,13;MQ=50;ANN=A	synonymous_variant	LOW	Gene_Vitvi01g01005.t01	Gene_Vitvi01g01005.t01	transcript	Vitvi01g01005.t01	Coding	4\2	c.489C>T	p.Leu163Leu	489\212	489\212	163\203		,A	upstream_gene_variant	MODIFIER	Gene_Vitvi01g01004.t01	Gene_Vitvi01g01004.t01	transcript	Vitvi01g01004.t01	Coding		c.-2314C>T					2314	GT:PL:DP:AD 0\2:255,0,251:38:15,23 0\2:0,48,255:16:16,0
Noirv2.chr1 12321507 . T C 221.0 . DP=65;VDB=0.240014;SGB=12.3071;RPB=0.249764;MQB=0.0482447;MQSB=0.391832;BQB=0.885805;MQ0F=0;ICB=0.3;HOB=0.125;AC=1;AN=4;DP4=19,25,16,4;MQ=50;ANN=C	synonymous_variant	LOW	Gene_Vitvi01g01005.t01	Gene_Vitvi01g01005.t01	transcript	Vitvi01g01005.t01	Coding	4\2	c.450A>G	p.Thr150Thr	450\212	450\212	150\203		,C	upstream_gene_variant	MODIFIER	Gene_Vitvi01g01004.t01	Gene_Vitvi01g01004.t01	transcript	Vitvi01g01004.t01	Coding		c.-2353A>G					2353	GT:PL:DP:AD 0\2:0,102,255:34:34,0 0\2:255,0,187:30:10,20
Noirv2.chr1 12321522 . A G 476.0 . DP=65;VDB=0.0821912;SGB=-1.37149;RPB=0.48641;MQB=0.980788;MQSB=0.46504;BQB=0.94754;MQ0F=0;ICB=0.3;HOB=0.125;AC=3;AN=4;DP4=8,3,25,25;MQ=50;ANN=G	synonymous_variant	LOW	Gene_Vitvi01g01005.t01	Gene_Vitvi01g01005.t01	transcript	Vitvi01g01005.t01	Coding	4\2	c.435T>C	p.Asn145Asn	435\212	435\212	145\203		,G	upstream_gene_variant	MODIFIER	Gene_Vitvi01g01004.t01	Gene_Vitvi01g01004.t01	transcript	Vitvi01g01004.t01	Coding		c.-2368T>C					2368	GT:PL:DP:AD 1\2:255,93,0:31:0,31 0\2:255,0,182:30:11,19
Noirv2.chr1 12321525 . G A 216.0 . DP=65;VDB=0.129633;SGB=18.5451;RPB=0.0931443;MQB=2.87733e-07;MQSB=0.62455;BQB=0.0120874;MQ0F=0;ICB=0.5;HOB=0.5;AC=2;AN=4;DP4=25,9,12,17;MQ=50;ANN=A	synonymous_variant	LOW	Gene_Vitvi01g01005.t01	Gene_Vitvi01g01005.t01	transcript	Vitvi01g01005.t01	Coding	4\2	c.432C>T	p.Ser144Ser	432\212	432\212	144\203		,A	upstream_gene_variant	MODIFIER	Gene_Vitvi01g01004.t01	Gene_Vitvi01g01004.t01	transcript	Vitvi01g01004.t01	Coding		c.-2371C>T					2371	GT:PL:DP:AD 1\2:255,38,0:31:2,29 0\2:0,96,255:32:32,0
Noirv2.chr1 12321540 . C T 204.0 . DP=66;VDB=0.0547385;SGB=11.6141;RPB=0.999896;MQB=0.0757572;MQSB=0.531175;BQB=0.998727;MQ0F=0;ICB=0.3;HOB=0.125;AC=1;AN=4;DP4=22,24,16,3;MQ=52;ANN=T	synonymous_variant	LOW	Gene_Vitvi01g01005.t01	Gene_Vitvi01g01005.t01	transcript	Vitvi01g01005.t01	Coding	4\2	c.417G>A	p.Ser139Ser	417\212	417\212	139\203		,T	upstream_gene_variant	MODIFIER	Gene_Vitvi01g01004.t01	Gene_Vitvi01g01004.t01	transcript	Vitvi01g01004.t01	Coding		c.-2386G>A					2386	GT:PL:DP:AD 0\2:0,105,255:35:35,0 0\2:238,0,191:30:11,19
Noirv2.chr1 12321555 . C T 174.0 . DP=74;VDB=0.229729;SGB=-6.25646;RPB=0.647624;MQB=5.85127e-05;MQSB=0.44358;BQB=0.0393699;MQ0F=0;ICB=0.3;HOB=0.125;AC=1;AN=4;DP4=33,24,9,5;MQ=51;ANN=T	splice_region_variant&intron_variant	LOW	Gene_Vitvi01g01005.t01	Gene_Vitvi01g01005.t01	transcript	Vitvi01g01005.t01	Coding	3\2	c.406-4G>A						,T	upstream_gene_variant	MODIFIER	Gene_Vitvi01g01004.t01	Gene_Vitvi01g01004.t01	transcript	Vitvi01g01004.t01	Coding		c.-2401G>A					2401	GT:PL:DP:AD 0\2:0,91,255:36:35,1 0\2:208,0,255:35:22,13
Noirv2.chr1 12321557 . G A 172.0 . DP=77;VDB=0.240377;SGB=-6.25646;RPB=0.769126;MQB=9.13698e-05;MQSB=0.622083;BQB=0.271521;MQ0F=0;ICB=0.3;HOB=0.125;AC=1;AN=4;DP4=35,25,9,5;MQ=51;ANN=A	splice_region_variant&intron_variant	LOW	Gene_Vitvi01g01005.t01	Gene_Vitvi01g01005.t01	transcript	Vitvi01g01005.t01	Coding	3\2	c.406-6C>T						,A	upstream_gene_variant	MODIFIER	Gene_Vitvi01g01004.t01	Gene_Vitvi01g01004.t01	transcript	Vitvi01g01004.t01	Coding		c.-2403C>T					2403	GT:PL:DP:AD 0\2:0,97,255:38:37,1 0\2:206,0,255:36:23,13
Noirv2.chr1 12321706 . A G 307.0 . DP=47;VDB=0.936053;SGB=-9.63298;RPB=0.913066;MQB=0.883566;MQSB=0.828799;BQB=0.963558;MQ0F=0;ICB=0.3;HOB=0.125;AC=3;AN=4;DP4=11,8,13,12;MQ=50;ANN=G	splice_region_variant&intron_variant	LOW	Gene_Vitvi01g01005.t01	Gene_Vitvi01g01005.t01	transcript	Vitvi01g01005.t01	Coding	3\2	c.405+6T>C						,G	upstream_gene_variant	MODIFIER	Gene_Vitvi01g01004.t01	Gene_Vitvi01g01004.t01	transcript	Vitvi01g01004.t01	Coding		c.-2552T>C					2552	GT:PL:DP:AD 1\2:255,60,0:20:0,20 0\2:86,0,255:24:19,5
Noirv2.chr1 12321727 . C T 123.0 . DP=45;VDB=0.107081;SGB=4.69269;RPB=0.544635;MQB=0.254823;MQSB=0.999655;BQB=0.452191;MQ0F=0;ICB=0.3;HOB=0.125;AC=1;AN=4;DP4=16,16,7,2;MQ=50;ANN=T	synonymous_variant	LOW	Gene_Vitvi01g01005.t01	Gene_Vitvi01g01005.t01	transcript	Vitvi01g01005.t01	Coding	3\2	c.390G>A	p.Leu130Leu	390\212	390\212	130\203		,T	upstream_gene_variant	MODIFIER	Gene_Vitvi01g01004.t01	Gene_Vitvi01g01004.t01	transcript	Vitvi01g01004.t01	Coding		c.-2573G>A					2573	GT:PL:DP:AD 0\2:0,54,255:18:18,0 0\2:157,0,249:23:14,9
Noirv2.chr1 12321733 . T C 483.0 . DP=42;VDB=0.12304;SGB=-1.34821;MQSB=0.753938;MQ0F=0;AC=4;AN=4;DP4=0,0,23,14;MQ=52;ANN=C	synonymous_variant	LOW	Gene_Vitvi01g01005.t01	Gene_Vitvi01g01005.t01	transcript	Vitvi01g01005.t01	Coding	3\2	c.384A>G	p.Thr128Thr	384\212	384\212	128\203		,C	upstream_gene_variant	MODIFIER	Gene_Vitvi01g01004.t01	Gene_Vitvi01g01004.t01	transcript	Vitvi01g01004.t01	Coding		c.-2579A>G					2579	GT:PL:DP:AD 1\2:255,42,0:14:0,14 1\2:255,69,0:23:0,23
Noirv2.chr1 12321736 . C T 216.0 . DP=44;VDB=0.00221461;SGB=8.15014;RPB=0.924225;MQB=0.890307;MQSB=0.643683;BQB=0.45107;MQ0F=0;ICB=0.5;HOB=0.5;AC=2;AN=4;DP4=17,9,7,7;MQ=52;ANN=T	synonymous_variant	LOW	Gene_Vitvi01g01005.t01	Gene_Vitvi01g01005.t01	transcript	Vitvi01g01005.t01	Coding	3\2	c.381G>A	p.Ala127Ala	381\212	381\212	127\203		,T	upstream_gene_variant	MODIFIER	Gene_Vitvi01g01004.t01	Gene_Vitvi01g01004.t01	transcript	Vitvi01g01004.t01	Coding		c.-2582G>A					2582	GT:PL:DP:AD 1\2:255,42,0:14:0,14 0\2:0,78,255:26:26,0
Noirv2.chr1 12321760 . A G 486.0 . DP=50;VDB=0.500721;SGB=-1.38551;RPB=1;MQB=1;MQSB=0.741304;BQB=1;MQ0F=0;AC=4;AN=4;DP4=1,0,27,20;MQ=56;ANN=G	synonymous_variant	LOW	Gene_Vitvi01g01005.t01	Gene_Vitvi01g01005.t01	transcript	Vitvi01g01005.t01	Coding	3\2	c.357T>C	p.Ser119Ser	357\212	357\212	119\203		,G	upstream_gene_variant	MODIFIER	Gene_Vitvi01g01004.t01	Gene_Vitvi01g01004.t01	transcript	Vitvi01g01004.t01	Coding		c.-2606T>C					2606	GT:PL:DP:AD 1\2:255,69,0:23:0,23 1\2:255,43,0:25:1,24
Noirv2.chr1 12321763 . G T 105.0 . DP=51;VDB=0.15244;SGB=3.31571;RPB=1;MQB=0.85624;MQSB=0.811412;BQB=0.842375;MQ0F=0;ICB=0.3;HOB=0.125;AC=1;AN=4;DP4=25,17,3,4;MQ=56;ANN=T	synonymous_variant	LOW	Gene_Vitvi01g01005.t01	Gene_Vitvi01g01005.t01	transcript	Vitvi01g01005.t01	Coding	3\2	c.354C>A	p.Ser118Ser	354\212	354\212	118\203		,T	upstream_gene_variant	MODIFIER	Gene_Vitvi01g01004.t01	Gene_Vitvi01g01004.t01	transcript	Vitvi01g01004.t01	Coding		c.-2609C>A					2609	GT:PL:DP:AD 0\2:0,75,255:25:25,0 0\2:139,0,255:24:17,7
Noirv2.chr1 12321784 . C T 190.0 . DP=72;VDB=0.105139;SGB=7.4578;RPB=0.32548;MQB=0.99096;MQSB=0.751219;BQB=0.770888;MQ0F=0;ICB=0.3;HOB=0.125;AC=1;AN=4;DP4=31,23,8,5;MQ=57;ANN=T	synonymous_variant	LOW	Gene_Vitvi01g01005.t01	Gene_Vitvi01g01005.t01	transcript	Vitvi01g01005.t01	Coding	3\2	c.333G>A	p.Gln111Gln	333\212	333\212	111\203		,T	upstream_gene_variant	MODIFIER	Gene_Vitvi01g01004.t01	Gene_Vitvi01g01004.t01	transcript	Vitvi01g01004.t01	Coding		c.-2630G>A					2630	GT:PL:DP:AD 0\2:0,99,255:33:33,0 0\2:224,0,255:34:21,13
Noirv2.chr1 12321796 . G A 221.0 . DP=74;VDB=0.931276;SGB=10.9211;RPB=0.577356;MQB=0.955322;MQSB=0.512356;BQB=0.335393;MQ0F=0;ICB=0.3;HOB=0.125;AC=1;AN=4;DP4=29,23,12,6;MQ=57;ANN=A	synonymous_variant	LOW	Gene_Vitvi01g01005.t01	Gene_Vitvi01g01005.t01	transcript	Vitvi01g01005.t01	Coding	3\2	c.321C>T	p.Asp107Asp	321\212	321\212	107\203		,A	upstream_gene_variant	MODIFIER	Gene_Vitvi01g01004.t01	Gene_Vitvi01g01004.t01	transcript	Vitvi01g01004.t01	Coding		c.-2642C>T					2642	GT:PL:DP:AD 0\2:255,0,255:36:18,18 0\2:0,102,255:34:34,0
Noirv2.chr1 12321799 . G A 221.0 . DP=75;VDB=0.980468;SGB=10.2282;RPB=0.99845;MQB=0.997579;MQSB=0.495379;BQB=0.655494;MQ0F=0;ICB=0.3;HOB=0.125;AC=1;AN=4;DP4=29,23,11,6;MQ=57;ANN=A	synonymous_variant	LOW	Gene_Vitvi01g01005.t01	Gene_Vitvi01g01005.t01	transcript	Vitvi01g01005.t01	Coding	3\2	c.318C>T	p.Cys106Cys	318\212	318\212	106\203		,A	upstream_gene_variant	MODIFIER	Gene_Vitvi01g01004.t01	Gene_Vitvi01g01004.t01	transcript	Vitvi01g01004.t01	Coding		c.-2645C>T					2645	GT:PL:DP:AD 0\2:0,111,255:37:37,0 0\2:255,0,255:32:15,17
Noirv2.chr1 12321826 . G A 199.0 . DP=64;VDB=0.0280607;SGB=7.4578;RPB=0.735569;MQB=0.636206;MQSB=0.832606;BQB=0.987517;MQ0F=0;ICB=0.3;HOB=0.125;AC=1;AN=4;DP4=29,19,8,5;MQ=58;ANN=A	synonymous_variant	LOW	Gene_Vitvi01g01005.t01	Gene_Vitvi01g01005.t01	transcript	Vitvi01g01005.t01	Coding	3\2	c.291C>T	p.Gly97Gly	291\212	291\212	97\203		,A	upstream_gene_variant	MODIFIER	Gene_Vitvi01g01004.t01	Gene_Vitvi01g01004.t01	transcript	Vitvi01g01004.t01	Coding		c.-2672C>T					2672	GT:PL:DP:AD 0\2:0,102,255:34:34,0 0\2:233,0,247:27:14,13
Noirv2.chr1 12321835 . T C 483.0 . DP=62;VDB=1.1947e-05;SGB=-1.3858;MQSB=0.832606;MQ0F=0;AC=4;AN=4;DP4=0,0,37,24;MQ=58;ANN=C	synonymous_variant	LOW	Gene_Vitvi01g01005.t01	Gene_Vitvi01g01005.t01	transcript	Vitvi01g01005.t01	Coding	3\2	c.282A>G	p.Pro94Pro	282\212	282\212	94\203		,C	upstream_gene_variant	MODIFIER	Gene_Vitvi01g01004.t01	Gene_Vitvi01g01004.t01	transcript	Vitvi01g01004.t01	Coding		c.-2681A>G					2681	GT:PL:DP:AD 1\2:255,102,0:34:0,34 1\2:255,81,0:27:0,27
Noirv2.chr1 12321892 . C T 116.0 . DP=73;VDB=0.477568;SGB=5.38303;RPB=0.193434;MQB=0.968807;MQSB=0.997445;BQB=0.262132;MQ0F=0;ICB=0.3;HOB=0.125;AC=1;AN=4;DP4=35,25,6,4;MQ=54;ANN=T	synonymous_variant	LOW	Gene_Vitvi01g01005.t01	Gene_Vitvi01g01005.t01	transcript	Vitvi01g01005.t01	Coding	3\2	c.225G>A	p.Leu75Leu	225\212	225\212	75\203		,T	upstream_gene_variant	MODIFIER	Gene_Vitvi01g01004.t01	Gene_Vitvi01g01004.t01	transcript	Vitvi01g01004.t01	Coding		c.-2738G>A					2738	GT:PL:DP:AD 0\2:0,114,255:38:38,0 0\2:150,0,255:32:22,10
Noirv2.chr1 12321907 . G A 7.59675 . DP=68;VDB=0.0949329;SGB=1.27626;RPB=0.262148;MQB=0.0268136;MQSB=0.998169;BQB=0.996544;MQ0F=0;ICB=0.3;HOB=0.125;AC=1;AN=4;DP4=31,29,3,1;MQ=54;ANN=A	synonymous_variant	LOW	Gene_Vitvi01g01005.t01	Gene_Vitvi01g01005.t01	transcript	Vitvi01g01005.t01	Coding	3\2	c.210C>T	p.Asp70Asp	210\212	210\212	70\203		,A	upstream_gene_variant	MODIFIER	Gene_Vitvi01g01004.t01	Gene_Vitvi01g01004.t01	transcript	Vitvi01g01004.t01	Coding		c.-2753C>T					2753	GT:PL:DP:AD 0\2:0,108,255:36:36,0 0\2:43,0,255:28:24,4
Noirv2.chr1 12321931 . G A 120.0 . DP=62;VDB=0.0299676;SGB=-5.33419;RPB=0.0333259;MQB=0.5337;MQSB=0.725354;BQB=0.947857;MQ0F=0;ICB=0.3;HOB=0.125;AC=1;AN=4;DP4=25,22,3,8;MQ=52;ANN=A	synonymous_variant	LOW	Gene_Vitvi01g01005.t01	Gene_Vitvi01g01005.t01	transcript	Vitvi01g01005.t01	Coding	3\2	c.186C>T	p.Ala62Ala	186\212	186\212	62\203		,A	upstream_gene_variant	MODIFIER	Gene_Vitvi01g01004.t01	Gene_Vitvi01g01004.t01	transcript	Vitvi01g01004.t01	Coding		c.-2777C>T					2777	GT:PL:DP:AD 0\2:0,84,255:29:28,0 0\2:154,0,255:29:19,10
Noirv2.chr1 12321934 . C A 182.0 . DP=61;VDB=0.347638;SGB=8.84268;RPB=0.875817;MQB=1.01922e-05;MQSB=0.872535;BQB=0.461827;MQ0F=0;ICB=0.3;HOB=0.125;AC=1;AN=4;DP4=23,20,4,11;MQ=52;ANN=A	synonymous_variant	LOW	Gene_Vitvi01g01005.t01	Gene_Vitvi01g01005.t01	transcript	Vitvi01g01005.t01	Coding	3\2	c.183G>T	p.Val61Val	183\212	183\212	61\203		,A	upstream_gene_variant	MODIFIER	Gene_Vitvi01g01004.t01	Gene_Vitvi01g01004.t01	transcript	Vitvi01g01004.t01	Coding		c.-2780G>T					2780	GT:PL:DP:AD 0\2:0,84,255:28:28,0 0\2:216,0,234:30:15,15
Noirv2.chr1 12321973 . C T 172.0 . DP=73;VDB=0.0336584;SGB=8.84268;RPB=0.423809;MQB=0.739733;MQSB=0.572424;BQB=0.93472;MQ0F=0;ICB=0.3;HOB=0.125;AC=1;AN=4;DP4=25,32,4,11;MQ=49;ANN=T	splice_region_variant&intron_variant	LOW	Gene_Vitvi01g01005.t01	Gene_Vitvi01g01005.t01	transcript	Vitvi01g01005.t01	Coding	2\2	c.148-4G>A						,T	upstream_gene_variant	MODIFIER	Gene_Vitvi01g01004.t01	Gene_Vitvi01g01004.t01	transcript	Vitvi01g01004.t01	Coding		c.-2819G>A					2819	GT:PL:DP:AD 0\2:0,84,255:28:28,0 0\2:206,0,255:44:29,15
Noirv2.chr1 12321975 . A G 216.0 . DP=73;VDB=0.0436887;SGB=28.2491;RPB=0.308914;MQB=2.79219e-07;MQSB=0.475901;BQB=0.80723;MQ0F=0;ICB=0.5;HOB=0.5;AC=2;AN=4;DP4=15,14,13,30;MQ=50;ANN=G	splice_region_variant&intron_variant	LOW	Gene_Vitvi01g01005.t01	Gene_Vitvi01g01005.t01	transcript	Vitvi01g01005.t01	Coding	2\2	c.148-6T>C						,G	upstream_gene_variant	MODIFIER	Gene_Vitvi01g01004.t01	Gene_Vitvi01g01004.t01	transcript	Vitvi01g01004.t01	Coding		c.-2821T>C					2821	GT:PL:DP:AD 0\2:0,87,255:29:29,0 1\2:255,129,0:43:0,43
Noirv2.chr1 12322009 . T C 221.0 . DP=80;VDB=0.0465997;SGB=17.1588;RPB=0.944971;MQB=1.51362e-06;MQSB=0.645652;BQB=0.81179;MQ0F=0;ICB=0.3;HOB=0.125;AC=1;AN=4;DP4=22,27,9,18;MQ=49;ANN=C	splice_region_variant&intron_variant	LOW	Gene_Vitvi01g01005.t01	Gene_Vitvi01g01005.t01	transcript	Vitvi01g01005.t01	Coding	2\2	c.147+3A>G						,C	upstream_gene_variant	MODIFIER	Gene_Vitvi01g01004.t01	Gene_Vitvi01g01004.t01	transcript	Vitvi01g01004.t01	Coding		c.-2855A>G					2855	GT:PL:DP:AD 0\2:0,87,255:29:29,0 0\2:255,0,255:47:20,27
Noirv2.chr1 12322015 . G A 216.0 . DP=73;VDB=0.00238942;SGB=27.556;RPB=0.757908;MQB=8.20462e-07;MQSB=0.223981;BQB=0.299773;MQ0F=0;ICB=0.5;HOB=0.5;AC=2;AN=4;DP4=16,10,13,29;MQ=49;ANN=A	synonymous_variant	LOW	Gene_Vitvi01g01005.t01	Gene_Vitvi01g01005.t01	transcript	Vitvi01g01005.t01	Coding	2\2	c.144C>T	p.Asp48Asp	144\212	144\212	48\203		,A	upstream_gene_variant	MODIFIER	Gene_Vitvi01g01004.t01	Gene_Vitvi01g01004.t01	transcript	Vitvi01g01004.t01	Coding		c.-2861C>T					2861	GT:PL:DP:AD 0\2:0,78,255:26:26,0 1\2:255,126,0:42:0,42
Noirv2.chr1 12322018 . T C 216.0 . DP=71;VDB=0.00260408;SGB=27.556;RPB=0.661062;MQB=5.75195e-07;MQSB=0.265325;BQB=0.690479;MQ0F=0;ICB=0.5;HOB=0.5;AC=2;AN=4;DP4=16,11,13,29;MQ=49;ANN=C	synonymous_variant	LOW	Gene_Vitvi01g01005.t01	Gene_Vitvi01g01005.t01	transcript	Vitvi01g01005.t01	Coding	2\2	c.141A>G	p.Thr47Thr	141\212	141\212	47\203		,C	upstream_gene_variant	MODIFIER	Gene_Vitvi01g01004.t01	Gene_Vitvi01g01004.t01	transcript	Vitvi01g01004.t01	Coding		c.-2864A>G					2864	GT:PL:DP:AD 0\2:0,81,255:27:27,0 1\2:255,126,0:42:0,42
Noirv2.chr1 12322027 . G A 221.0 . DP=70;VDB=0.22938;SGB=10.9211;RPB=0.965722;MQB=0.869778;MQSB=0.442328;BQB=0.991318;MQ0F=0;ICB=0.3;HOB=0.125;AC=1;AN=4;DP4=22,28,6,12;MQ=49;ANN=A	synonymous_variant	LOW	Gene_Vitvi01g01005.t01	Gene_Vitvi01g01005.t01	transcript	Vitvi01g01005.t01	Coding	2\2	c.132C>T	p.His44His	132\212	132\212	44\203		,A	upstream_gene_variant	MODIFIER	Gene_Vitvi01g01004.t01	Gene_Vitvi01g01004.t01	transcript	Vitvi01g01004.t01	Coding		c.-2873C>T					2873	GT:PL:DP:AD 0\2:0,75,255:25:25,0 0\2:255,0,255:43:25,18
Noirv2.chr1 12322042 . G A 173.0 . DP=72;VDB=0.968653;SGB=-6.25745;RPB=0.405578;MQB=0.656355;MQSB=0.92552;BQB=0.999973;MQ0F=0;ICB=0.3;HOB=0.125;AC=1;AN=4;DP4=21,35,8,6;MQ=49;ANN=A	synonymous_variant	LOW	Gene_Vitvi01g01005.t01	Gene_Vitvi01g01005.t01	transcript	Vitvi01g01005.t01	Coding	2\2	c.117C>T	p.Asn39Asn	117\212	117\212	39\203		,A	upstream_gene_variant	MODIFIER	Gene_Vitvi01g01004.t01	Gene_Vitvi01g01004.t01	transcript	Vitvi01g01004.t01	Coding		c.-2888C>T					2888	GT:PL:DP:AD 0\2:206,0,255:25:15,10 0\2:0,10,255:45:41,4
Noirv2.chr1 12322084 . G A 168.0 . DP=59;VDB=0.0142638;SGB=6.07412;RPB=0.575489;MQB=0.00277503;MQSB=0.996978;BQB=0.109685;MQ0F=0;ICB=0.3;HOB=0.125;AC=1;AN=4;DP4=23,24,5,6;MQ=47;ANN=A	synonymous_variant	LOW	Gene_Vitvi01g01005.t01	Gene_Vitvi01g01005.t01	transcript	Vitvi01g01005.t01	Coding	2\2	c.75C>T	p.Asn25Asn	75\212	75\212	25\203		,A	upstream_gene_variant	MODIFIER	Gene_Vitvi01g01004.t01	Gene_Vitvi01g01004.t01	transcript	Vitvi01g01004.t01	Coding		c.-2930C>T					2930	GT:PL:DP:AD 0\2:0,75,255:25:25,0 0\2:202,0,255:33:22,11
Noirv2.chr1 12322160 . C A 36.3972 . DP=54;VDB=0.940103;SGB=-3.78882;RPB=0.723841;MQB=0.130731;MQSB=0.469992;BQB=0.268113;MQ0F=0;ICB=0.3;HOB=0.125;AC=1;AN=4;DP4=30,15,4,2;MQ=49;ANN=A	splice_region_variant&intron_variant	LOW	Gene_Vitvi01g01005.t01	Gene_Vitvi01g01005.t01	transcript	Vitvi01g01005.t01	Coding	1\2	c.6-7G>T						,A	upstream_gene_variant	MODIFIER	Gene_Vitvi01g01004.t01	Gene_Vitvi01g01004.t01	transcript	Vitvi01g01004.t01	Coding		c.-3006G>T					3006	GT:PL:DP:AD 0\2:0,66,255:23:22,0 0\2:72,0,255:28:23,5
Noirv2.chr1 12322190 . C T 211.0 . DP=56;VDB=0.405237;SGB=8.15014;RPB=0.43909;MQB=0.64434;MQSB=0.455912;BQB=0.996888;MQ0F=0;ICB=0.3;HOB=0.125;AC=1;AN=4;DP4=23,17,7,7;MQ=51;ANN=T	splice_region_variant&intron_variant	LOW	Gene_Vitvi01g01005.t01	Gene_Vitvi01g01005.t01	transcript	Vitvi01g01005.t01	Coding	1\2	c.5+6G>A						,T	upstream_gene_variant	MODIFIER	Gene_Vitvi01g01004.t01	Gene_Vitvi01g01004.t01	transcript	Vitvi01g01004.t01	Coding		c.-3036G>A					3036	GT:PL:DP:AD 0\2:0,69,255:23:23,0 0\2:245,0,255:31:17,14
Noirv2.chr1 12322192 . A G 476.0 . DP=55;VDB=0.275372;SGB=-13.9289;RPB=0.14097;MQB=0.199315;MQSB=0.30169;BQB=0.125485;MQ0F=0;ICB=0.3;HOB=0.125;AC=3;AN=4;DP4=7,8,24,15;MQ=51;ANN=G	splice_region_variant&intron_variant	LOW	Gene_Vitvi01g01005.t01	Gene_Vitvi01g01005.t01	transcript	Vitvi01g01005.t01	Coding	1\2	c.5+4T>C						,G	upstream_gene_variant	MODIFIER	Gene_Vitvi01g01004.t01	Gene_Vitvi01g01004.t01	transcript	Vitvi01g01004.t01	Coding		c.-3038T>C					3038	GT:PL:DP:AD 1\2:255,66,0:22:0,22 0\2:255,0,239:32:15,17
Noirv2.chr1 12334588 . G A 321.0 . DP=31;VDB=0.839746;SGB=-7.79186;RPB=0.656356;MQB=1;MQSB=1;BQB=0.990571;MQ0F=0;ICB=0.3;HOB=0.125;AC=3;AN=4;DP4=9,1,15,4;MQ=60;ANN=A	synonymous_variant	LOW	Gene_Vitvi01g01006.t01	Gene_Vitvi01g01006.t01	transcript	Vitvi01g01006.t01	Coding	3\2	c.2673C>T	p.Gly891Gly	2687\2834	2673\2726	891\207		WARNING_TRANSCRIPT_MULTIPLE_STOP_CODONS,A	synonymous_variant	LOW	Gene_Vitvi01g01006.t02	Gene_Vitvi01g01006.t02	transcript	Vitvi01g01006.t02	Coding	3\2	c.2673C>T	p.Gly891Gly	2687\2834	2673\2726	891\207		WARNING_TRANSCRIPT_MULTIPLE_STOP_CODONS GT:PL:DP:AD 0\2:167,0,171:20:10,10 1\2:188,27,0:9:0,9
Noirv2.chr1 12334749 . C T 216.0 . DP=48;VDB=0.653855;SGB=22.1826;RPB=0.633936;MQB=1;MQSB=1;BQB=0.285692;MQ0F=0;ICB=0.5;HOB=0.5;AC=2;AN=4;DP4=5,6,16,20;MQ=60;ANN=T	splice_region_variant&intron_variant	LOW	Gene_Vitvi01g01006.t01	Gene_Vitvi01g01006.t01	transcript	Vitvi01g01006.t01	Coding	2\2	c.2563+3G>A						WARNING_TRANSCRIPT_MULTIPLE_STOP_CODONS,T	splice_region_variant&intron_variant	LOW	Gene_Vitvi01g01006.t02	Gene_Vitvi01g01006.t02	transcript	Vitvi01g01006.t02	Coding	2\2	c.2558+8G>A						WARNING_TRANSCRIPT_MULTIPLE_STOP_CODONS GT:PL:DP:AD 1\2:255,108,0:36:0,36 0\2:0,33,247:11:11,0
Noirv2.chr1 12334786 . A G,T 440.0 . DP=45;VDB=0.695841;SGB=-0.295956;MQSB=1;MQ0F=0;AC=3,1;AN=4;DP4=0,0,22,21;MQ=60;ANN=G	synonymous_variant	LOW	Gene_Vitvi01g01006.t01	Gene_Vitvi01g01006.t01	transcript	Vitvi01g01006.t01	Coding	2\2	c.2529T>C	p.Thr843Thr	2543\2834	2529\2726	843\207		WARNING_TRANSCRIPT_MULTIPLE_STOP_CODONS,T	synonymous_variant	LOW	Gene_Vitvi01g01006.t01	Gene_Vitvi01g01006.t01	transcript	Vitvi01g01006.t01	Coding	2\2	c.2529T>A	p.Thr843Thr	2543\2834	2529\2726	843\207		WARNING_TRANSCRIPT_MULTIPLE_STOP_CODONS,G	synonymous_variant	LOW	Gene_Vitvi01g01006.t02	Gene_Vitvi01g01006.t02	transcript	Vitvi01g01006.t02	Coding	2\2	c.2529T>C	p.Thr843Thr	2543\2834	2529\2726	843\207		WARNING_TRANSCRIPT_MULTIPLE_STOP_CODONS,T	synonymous_variant	LOW	Gene_Vitvi01g01006.t02	Gene_Vitvi01g01006.t02
Noirv2.chr1 12334861 . T A 317.0 . DP=33;VDB=0.0569463;SGB=-6.87128;RPB=0.0567496;MQB=1;MQSB=1;BQB=0.994178;MQ0F=0;ICB=0.3;HOB=0.125;AC=3;AN=4;DP4=9,8,10,6;MQ=60;ANN=A	synonymous_variant	LOW	Gene_Vitvi01g01006.t01	Gene_Vitvi01g01006.t01	transcript	Vitvi01g01006.t01	Coding	2\2	c.2454A>T	p.Arg818Arg	2468\2834	2454\2726	818\207		WARNING_TRANSCRIPT_MULTIPLE_STOP_CODONS,A	synonymous_variant	LOW	Gene_Vitvi01g01006.t02	Gene_Vitvi01g01006.t02	transcript	Vitvi01g01006.t02	Coding	2\2	c.2454A>T	p.Arg818Arg	2468\2834	2454\2726	818\207		WARNING_TRANSCRIPT_MULTIPLE_STOP_CODONS GT:PL:DP:AD 0\2:185,0,255:27:17,10 1\2:166,18,0:6:0,6
Noirv2.chr1 12334873 . A G 166.0 . DP=37;VDB=0.142559;SGB=5.38303;RPB=0.937561;MQB=1;MQSB=1;BQB=0.958629;MQ0F=0;ICB=0.3;HOB=0.125;AC=1;AN=4;DP4=14,13,6,4;MQ=60;ANN=G	synonymous_variant	LOW	Gene_Vitvi01g01006.t01	Gene_Vitvi01g01006.t01	transcript	Vitvi01g01006.t01	Coding	2\2	c.2442T>C	p.Asp814Asp	2456\2834	2442\2726	814\207		WARNING_TRANSCRIPT_MULTIPLE_STOP_CODONS,G	synonymous_variant	LOW	Gene_Vitvi01g01006.t02	Gene_Vitvi01g01006.t02	transcript	Vitvi01g01006.t02	Coding	2\2	c.2442T>C	p.Asp814Asp	2456\2834	2442\2726	814\207		WARNING_TRANSCRIPT_MULTIPLE_STOP_CODONS GT:PL:DP:AD 0\2:200,0,255:27:17,10 0\2:0,30,255:10:10,0
Noirv2.chr1 12334876 . T C 408.0 . DP=37;VDB=0.672677;SGB=-7.79186;RPB=0.179399;MQB=1;MQSB=1;BQB=0.991999;MQ0F=0;ICB=0.3;HOB=0.125;AC=3;AN=4;DP4=8,9,11,8;MQ=60;ANN=C	synonymous_variant	LOW	Gene_Vitvi01g01006.t01	Gene_Vitvi01g01006.t01	transcript	Vitvi01g01006.t01	Coding	2\2	c.2439A>G	p.Pro813Pro	2453\2834	2439\2726	813\207		WARNING_TRANSCRIPT_MULTIPLE_STOP_CODONS,C	synonymous_variant	LOW	Gene_Vitvi01g01006.t02	Gene_Vitvi01g01006.t02	transcript	Vitvi01g01006.t02	Coding	2\2	c.2439A>G	p.Pro813Pro	2453\2834	2439\2726	813\207		WARNING_TRANSCRIPT_MULTIPLE_STOP_CODONS GT:PL:DP:AD 0\2:202,0,255:27:17,10 1\2:240,27,0:9:0,9
Noirv2.chr1 12334936 . T A 216.0 . DP=29;VDB=0.13933;SGB=6.76576;RPB=0.953497;MQB=1;MQSB=1;BQB=0.988166;MQ0F=0;ICB=0.5;HOB=0.5;AC=2;AN=4;DP4=5,3,7,5;MQ=60;ANN=A	synonymous_variant	LOW	Gene_Vitvi01g01006.t01	Gene_Vitvi01g01006.t01	transcript	Vitvi01g01006.t01	Coding	2\2	c.2379A>T	p.Val793Val	2393\2834	2379\2726	793\207		WARNING_TRANSCRIPT_MULTIPLE_STOP_CODONS,A	synonymous_variant	LOW	Gene_Vitvi01g01006.t02	Gene_Vitvi01g01006.t02	transcript	Vitvi01g01006.t02	Coding	2\2	c.2379A>T	p.Val793Val	2393\2834	2379\2726	793\207		WARNING_TRANSCRIPT_MULTIPLE_STOP_CODONS GT:PL:DP:AD 1\2:255,36,0:12:0,12 0\2:0,24,222:8:8,0
Noirv2.chr1 12334945 . T C 214.0 . DP=38;VDB=0.225613;SGB=7.4578;RPB=0.392955;MQB=1;MQSB=1;BQB=0.6437;MQ0F=0;ICB=0.3;HOB=0.125;AC=1;AN=4;DP4=16,7,8,5;MQ=60;ANN=C	synonymous_variant	LOW	Gene_Vitvi01g01006.t01	Gene_Vitvi01g01006.t01	transcript	Vitvi01g01006.t01	Coding	2\2	c.2370A>G	p.Ala790Ala	2384\2834	2370\2726	790\207		WARNING_TRANSCRIPT_MULTIPLE_STOP_CODONS,C	synonymous_variant	LOW	Gene_Vitvi01g01006.t02	Gene_Vitvi01g01006.t02	transcript	Vitvi01g01006.t02	Coding	2\2	c.2370A>G	p.Ala790Ala	2384\2834	2370\2726	790\207		WARNING_TRANSCRIPT_MULTIPLE_STOP_CODONS GT:PL:DP:AD 0\2:248,0,255:28:15,13 0\2:0,24,230:8:8,0
Noirv2.chr1 12335146 . A T 184.0 . DP=36;VDB=0.448526;SGB=6.07412;RPB=0.890852;MQB=1;MQSB=1;BQB=0.111448;MQ0F=0;ICB=0.3;HOB=0.125;AC=1;AN=4;DP4=11,14,4,7;MQ=60;ANN=T	synonymous_variant	LOW	Gene_Vitvi01g01006.t01	Gene_Vitvi01g01006.t01	transcript	Vitvi01g01006.t01	Coding	2\2	c.2169T>A	p.Pro723Pro	2183\2834	2169\2726	723\207		WARNING_TRANSCRIPT_MULTIPLE_STOP_CODONS,T	synonymous_variant	LOW	Gene_Vitvi01g01006.t02	Gene_Vitvi01g01006.t02	transcript	Vitvi01g01006.t02	Coding	2\2	c.2169T>A	p.Pro723Pro	2183\2834	2169\2726	723\207		WARNING_TRANSCRIPT_MULTIPLE_STOP_CODONS GT:PL:DP:AD 0\2:218,0,255:29:18,11 0\2:0,21,80:7:7,0
Noirv2.chr1 12335149 . G A 179.0 . DP=36;VDB=0.448526;SGB=6.07412;RPB=0.958221;MQB=1;MQSB=1;BQB=1;MQ0F=0;ICB=1;HOB=0.5;AC=1;AN=2;DP4=9,9,4,7;MQ=60;ANN=A	synonymous_variant	LOW	Gene_Vitvi01g01006.t01	Gene_Vitvi01g01006.t01	transcript	Vitvi01g01006.t01	Coding	2\2	c.2166C>T	p.Phe722Phe	2180\2834	2166\2726	722\207		WARNING_TRANSCRIPT_MULTIPLE_STOP_CODONS,A	synonymous_variant	LOW	Gene_Vitvi01g01006.t02	Gene_Vitvi01g01006.t02	transcript	Vitvi01g01006.t02	Coding	2\2	c.2166C>T	p.Phe722Phe	2180\2834	2166\2726	722\207		WARNING_TRANSCRIPT_MULTIPLE_STOP_CODONS GT:PL:DP:AD 0\2:209,0,255:29:18,11 ./.:0,0,0:0:0,0
Noirv2.chr1 12335155 . T C 225.0 . DP=28;VDB=0.933417;SGB=10.2282;RPB=0.998894;MQB=1;MQSB=1;BQB=0.923174;MQ0F=0;ICB=1;HOB=0.5;AC=1;AN=2;DP4=4,7,8,9;MQ=60;ANN=C	synonymous_variant	LOW	Gene_Vitvi01g01006.t01	Gene_Vitvi01g01006.t01	transcript	Vitvi01g01006.t01	Coding	2\2	c.2160A>G	p.Val720Val	2174\2834	2160\2726	720\207		WARNING_TRANSCRIPT_MULTIPLE_STOP_CODONS,C	synonymous_variant	LOW	Gene_Vitvi01g01006.t02	Gene_Vitvi01g01006.t02	transcript	Vitvi01g01006.t02	Coding	2\2	c.2160A>G	p.Val720Val	2174\2834	2160\2726	720\207		WARNING_TRANSCRIPT_MULTIPLE_STOP_CODONS GT:PL:DP:AD 0\2:255,0,214:28:11,17 ./.:0,0,0:0:0,0
Noirv2.chr1 12335158 . G C 176.0 . DP=35;VDB=0.458055;SGB=6.07412;RPB=0.998894;MQB=1;MQSB=1;BQB=0.792454;MQ0F=0;ICB=1;HOB=0.5;AC=1;AN=2;DP4=8,9,4,7;MQ=60;ANN=C	synonymous_variant	LOW	Gene_Vitvi01g01006.t01	Gene_Vitvi01g01006.t01	transcript	Vitvi01g01006.t01	Coding	2\2	c.2157C>G	p.Val719Val	2171\2834	2157\2726	719\207		WARNING_TRANSCRIPT_MULTIPLE_STOP_CODONS,C	synonymous_variant	LOW	Gene_Vitvi01g01006.t02	Gene_Vitvi01g01006.t02	transcript	Vitvi01g01006.t02	Coding	2\2	c.2157C>G	p.Val719Val	2171\2834	2157\2726	719\207		WARNING_TRANSCRIPT_MULTIPLE_STOP_CODONS GT:PL:DP:AD 0\2:206,0,255:28:17,11 ./.:0,0,0:0:0,0
Noirv2.chr1 12335182 . T C 221.0 . DP=39;VDB=0.611175;SGB=8.15014;RPB=0.821895;MQB=1;MQSB=1;BQB=0.96106;MQ0F=0;ICB=0.3;HOB=0.125;AC=1;AN=4;DP4=9,14,7,7;MQ=60;ANN=C	stop_retained_variant	LOW	Gene_Vitvi01g01006.t01	Gene_Vitvi01g01006.t01	transcript	Vitvi01g01006.t01	Coding	2\2	c.2133A>G	p.Ter711Ter	2147\2834	2133\2726	711\207		WARNING_TRANSCRIPT_MULTIPLE_STOP_CODONS,C	stop_retained_variant	LOW	Gene_Vitvi01g01006.t02	Gene_Vitvi01g01006.t02	transcript	Vitvi01g01006.t02	Coding	2\2	c.2133A>G	p.Ter711Ter	2147\2834	2133\2726	711\207		WARNING_TRANSCRIPT_MULTIPLE_STOP_CODONS GT:PL:DP:AD 0\2:255,0,249:28:14,14 0\2:0,27,246:9:9,0
Noirv2.chr1 12335212 . C T 221.0 . DP=38;VDB=0.291443;SGB=8.15014;RPB=0.872671;MQB=1;MQSB=1;BQB=0.944888;MQ0F=0;ICB=0.3;HOB=0.125;AC=1;AN=4;DP4=8,13,9,5;MQ=60;ANN=T	synonymous_variant	LOW	Gene_Vitvi01g01006.t01	Gene_Vitvi01g01006.t01	transcript	Vitvi01g01006.t01	Coding	2\2	c.2103G>A	p.Gln701Gln	2117\2834	2103\2726	701\207		WARNING_TRANSCRIPT_MULTIPLE_STOP_CODONS,T	synonymous_variant	LOW	Gene_Vitvi01g01006.t02	Gene_Vitvi01g01006.t02	transcript	Vitvi01g01006.t02	Coding	2\2	c.2103G>A	p.Gln701Gln	2117\2834	2103\2726	701\207		WARNING_TRANSCRIPT_MULTIPLE_STOP_CODONS GT:PL:DP:AD 0\2:255,0,247:27:13,14 0\2:0,24,216:8:8,0
Noirv2.chr1 12335450 . T C 221.0 . DP=43;VDB=0.156745;SGB=8.84268;RPB=0.930124;MQB=1;MQSB=1;BQB=0.295312;MQ0F=0;ICB=0.3;HOB=0.125;AC=1;AN=4;DP4=14,13,7,8;MQ=60;ANN=C	synonymous_variant	LOW	Gene_Vitvi01g01006.t01	Gene_Vitvi01g01006.t01	transcript	Vitvi01g01006.t01	Coding	1\2	c.1896A>G	p.Lys632Lys	1910\2834	1896\2726	632\207		WARNING_TRANSCRIPT_MULTIPLE_STOP_CODONS,C	synonymous_variant	LOW	Gene_Vitvi01g01006.t02	Gene_Vitvi01g01006.t02	transcript	Vitvi01g01006.t02	Coding	1\2	c.1896A>G	p.Lys632Lys	1910\2834	1896\2726	632\207		WARNING_TRANSCRIPT_MULTIPLE_STOP_CODONS GT:PL:DP:AD 0\2:255,0,255:34:19,15 0\2:0,24,224:8:8,0
Noirv2.chr1 12335510 . C T 483.0 . DP=49;VDB=0.991029;SGB=-0.0236119;MQSB=1;MQ0F=0;AC=4;AN=4;DP4=0,0,27,18;MQ=60;ANN=T	synonymous_variant	LOW	Gene_Vitvi01g01006.t01	Gene_Vitvi01g01006.t01	transcript	Vitvi01g01006.t01	Coding	1\2	c.1836G>A	p.Leu612Leu	1850\2834	1836\2726	612\207		WARNING_TRANSCRIPT_MULTIPLE_STOP_CODONS,T	synonymous_variant	LOW	Gene_Vitvi01g01006.t02	Gene_Vitvi01g01006.t02	transcript	Vitvi01g01006.t02	Coding	1\2	c.1836G>A	p.Leu612Leu	1850\2834	1836\2726	612\207		WARNING_TRANSCRIPT_MULTIPLE_STOP_CODONS GT:PL:DP:AD 1\2:255,105,0:35:0,35 1\2:255,30,0:10:0,10
Noirv2.chr1 12335537 . C T 216.0 . DP=54;VDB=0.871925;SGB=24.7834;RPB=0.829171;MQB=1;MQSB=1;BQB=0.843969;MQ0F=0;ICB=0.5;HOB=0.5;AC=2;AN=4;DP4=7,8,22,16;MQ=60;ANN=T	synonymous_variant	LOW	Gene_Vitvi01g01006.t01	Gene_Vitvi01g01006.t01	transcript	Vitvi01g01006.t01	Coding	1\2	c.1809G>A	p.Pro603Pro	1823\2834	1809\2726	603\207		WARNING_TRANSCRIPT_MULTIPLE_STOP_CODONS,T	synonymous_variant	LOW	Gene_Vitvi01g01006.t02	Gene_Vitvi01g01006.t02	transcript	Vitvi01g01006.t02	Coding	1\2	c.1809G>A	p.Pro603Pro	1823\2834	1809\2726	603\207		WARNING_TRANSCRIPT_MULTIPLE_STOP_CODONS GT:PL:DP:AD 1\2:255,114,0:38:0,38 0\2:0,45,255:15:15,0
Noirv2.chr1 12335603 . G C 160.0 . DP=59;VDB=0.514339;SGB=7.4578;RPB=0.0681377;MQB=1;MQSB=1;BQB=0.897296;MQ0F=0;ICB=0.3;HOB=0.125;AC=1;AN=4;DP4=22,20,10,3;MQ=60;ANN=C	synonymous_variant	LOW	Gene_Vitvi01g01006.t01	Gene_Vitvi01g01006.t01	transcript	Vitvi01g01006.t01	Coding	1\2	c.1743C>G	p.Ser581Ser	1757\2834	1743\2726	581\207		WARNING_TRANSCRIPT_MULTIPLE_STOP_CODONS,C	synonymous_variant	LOW	Gene_Vitvi01g01006.t02	Gene_Vitvi01g01006.t02	transcript	Vitvi01g01006.t02	Coding	1\2	c.1743C>G	p.Ser581Ser	1757\2834	1743\2726	581\207		WARNING_TRANSCRIPT_MULTIPLE_STOP_CODONS GT:PL:DP:AD 0\2:194,0,255:39:26,13 0\2:0,48,255:16:16,0
Noirv2.chr1 12335693 . C T 483.0 . DP=49;VDB=0.392063;SGB=-1.35342;MQSB=1;MQ0F=0;AC=4;AN=4;DP4=0,0,28,19;MQ=60;ANN=T	synonymous_variant	LOW	Gene_Vitvi01g01006.t01	Gene_Vitvi01g01006.t01	transcript	Vitvi01g01006.t01	Coding	1\2	c.1653G>A	p.Glu551Glu	1667\2834	1653\2726	551\207		WARNING_TRANSCRIPT_MULTIPLE_STOP_CODONS,T	synonymous_variant	LOW	Gene_Vitvi01g01006.t02	Gene_Vitvi01g01006.t02	transcript	Vitvi01g01006.t02	Coding	1\2	c.1653G>A	p.Glu551Glu	1667\2834	1653\2726	551\207		WARNING_TRANSCRIPT_MULTIPLE_STOP_CODONS GT:PL:DP:AD 1\2:255,90,0:30:0,30 1\2:255,51,0:17:0,17
Noirv2.chr1 12335698 . G A 483.0 . DP=50;VDB=0.467688;SGB=-1.34656;MQSB=1;MQ0F=0;AC=4;AN=4;DP4=0,0,29,19;MQ=60;ANN=A	synonymous_variant	LOW	Gene_Vitvi01g01006.t01	Gene_Vitvi01g01006.t01	transcript	Vitvi01g01006.t01	Coding	1\2	c.1648C>T	p.Leu550Leu	1662\2834	1648\2726	550\207		WARNING_TRANSCRIPT_MULTIPLE_STOP_CODONS,A	synonymous_variant	LOW	Gene_Vitvi01g01006.t02	Gene_Vitvi01g01006.t02	transcript	Vitvi01g01006.t02	Coding	1\2	c.1648C>T	p.Leu550Leu	1662\2834	1648\2726	550\207		WARNING_TRANSCRIPT_MULTIPLE_STOP_CODONS GT:PL:DP:AD 1\2:255,93,0:31:0,31 1\2:255,51,0:17:0,17
Noirv2.chr1 12335759 . A G 483.0 . DP=48;VDB=0.380621;SGB=-1.3216;MQSB=1;MQ0F=0;AC=4;AN=4;DP4=0,0,29,18;MQ=60;ANN=G	synonymous_variant	LOW	Gene_Vitvi01g01006.t01	Gene_Vitvi01g01006.t01	transcript	Vitvi01g01006.t01	Coding	1\2	c.1587T>C	p.Thr529Thr	1601\2834	1587\2726	529\207		WARNING_TRANSCRIPT_MULTIPLE_STOP_CODONS,G	synonymous_variant	LOW	Gene_Vitvi01g01006.t02	Gene_Vitvi01g01006.t02	transcript	Vitvi01g01006.t02	Coding	1\2	c.1587T>C	p.Thr529Thr	1601\2834	1587\2726	529\207		WARNING_TRANSCRIPT_MULTIPLE_STOP_CODONS GT:PL:DP:AD 1\2:255,93,0:31:0,31 1\2:255,48,0:16:0,16
Noirv2.chr1 12335840 . T A 483.0 . DP=62;VDB=0.543303;SGB=-1.37199;MQSB=0.949591;MQ0F=0;AC=4;AN=4;DP4=0,0,38,19;MQ=59;ANN=A	synonymous_variant	LOW	Gene_Vitvi01g01006.t01	Gene_Vitvi01g01006.t01	transcript	Vitvi01g01006.t01	Coding	1\2	c.1506A>T	p.Ala502Ala	1520\2834	1506\2726	502\207		WARNING_TRANSCRIPT_MULTIPLE_STOP_CODONS,A	synonymous_variant	LOW	Gene_Vitvi01g01006.t02	Gene_Vitvi01g01006.t02	transcript	Vitvi01g01006.t02	Coding	1\2	c.1506A>T	p.Ala502Ala	1520\2834	1506\2726	502\207		WARNING_TRANSCRIPT_MULTIPLE_STOP_CODONS GT:PL:DP:AD 1\2:255,108,0:36:0,36 1\2:255,63,0:21:0,21
Noirv2.chr1 12335984 . T C 201.0 . DP=68;VDB=0.598947;SGB=6.76576;RPB=0.660858;MQB=1;MQSB=1;BQB=0.937652;MQ0F=0;ICB=0.3;HOB=0.125;AC=1;AN=4;DP4=27,24,4,8;MQ=60;ANN=C	synonymous_variant	LOW	Gene_Vitvi01g01006.t01	Gene_Vitvi01g01006.t01	transcript	Vitvi01g01006.t01	Coding	1\2	c.1362A>G	p.Thr454Thr	1376\2834	1362\2726	454\207		WARNING_TRANSCRIPT_MULTIPLE_STOP_CODONS,C	synonymous_variant	LOW	Gene_Vitvi01g01006.t02	Gene_Vitvi01g01006.t02	transcript	Vitvi01g01006.t02	Coding	1\2	c.1362A>G	p.Thr454Thr	1376\2834	1362\2726	454\207		WARNING_TRANSCRIPT_MULTIPLE_STOP_CODONS GT:PL:DP:AD 0\2:0,120,255:40:40,0 0\2:235,0,152:23:11,12
Noirv2.chr1 12336053 . G A 195.0 . DP=69;VDB=0.323267;SGB=8.84268;RPB=0.94925;MQB=1;MQSB=1;BQB=0.99364;MQ0F=0;ICB=0.3;HOB=0.125;AC=1;AN=4;DP4=29,19,4,11;MQ=60;ANN=A	synonymous_variant	LOW	Gene_Vitvi01g01006.t01	Gene_Vitvi01g01006.t01	transcript	Vitvi01g01006.t01	Coding	1\2	c.1293C>T	p.Leu431Leu	1307\2834	1293\2726	431\207		WARNING_TRANSCRIPT_MULTIPLE_STOP_CODONS,A	synonymous_variant	LOW	Gene_Vitvi01g01006.t02	Gene_Vitvi01g01006.t02	transcript	Vitvi01g01006.t02	Coding	1\2	c.1293C>T	p.Leu431Leu	1307\2834	1293\2726	431\207		WARNING_TRANSCRIPT_MULTIPLE_STOP_CODONS GT:PL:DP:AD 0\2:229,0,255:43:28,15 0\2:0,60,255:20:20,0
Noirv2.chr1 12336113 . T C 221.0 . DP=68;VDB=0.355613;SGB=8.84268;RPB=0.108442;MQB=1;MQSB=1;BQB=0.748745;MQ0F=0;ICB=0.3;HOB=0.125;AC=1;AN=4;DP4=24,25,6,9;MQ=60;ANN=C	synonymous_variant	LOW	Gene_Vitvi01g01006.t01	Gene_Vitvi01g01006.t01	transcript	Vitvi01g01006.t01	Coding	1\2	c.1233A>G	p.Gln411Gln	1247\2834	1233\2726	411\207		WARNING_TRANSCRIPT_MULTIPLE_STOP_CODONS,C	synonymous_variant	LOW	Gene_Vitvi01g01006.t02	Gene_Vitvi01g01006.t02	transcript	Vitvi01g01006.t02	Coding	1\2	c.1233A>G	p.Gln411Gln	1247\2834	1233\2726	411\207		WARNING_TRANSCRIPT_MULTIPLE_STOP_CODONS GT:PL:DP:AD 0\2:0,117,255:39:39,0 0\2:255,0,211:25:10,15
Noirv2.chr1 12336167 . G A 416.0 . DP=72;VDB=0.522349;SGB=-12.0878;RPB=0.977207;MQB=1;MQSB=1;BQB=0.793023;MQ0F=0;ICB=0.5;HOB=0.5;AC=2;AN=4;DP4=20,15,14,19;MQ=60;ANN=A	synonymous_variant	LOW	Gene_Vitvi01g01006.t01	Gene_Vitvi01g01006.t01	transcript	Vitvi01g01006.t01	Coding	1\2	c.1179C>T	p.Thr393Thr	1193\2834	1179\2726	393\207		WARNING_TRANSCRIPT_MULTIPLE_STOP_CODONS,A	synonymous_variant	LOW	Gene_Vitvi01g01006.t02	Gene_Vitvi01g01006.t02	transcript	Vitvi01g01006.t02	Coding	1\2	c.1179C>T	p.Thr393Thr	1193\2834	1179\2726	393\207		WARNING_TRANSCRIPT_MULTIPLE_STOP_CODONS GT:PL:DP:AD 0\2:255,0,230:36:13,23 0\2:194,0,255:32:22,10
Noirv2.chr1 12336326 . C A 221.0 . DP=73;VDB=0.87041;SGB=11.6141;RPB=0.634032;MQB=1;MQSB=1;BQB=0.661469;MQ0F=0;ICB=0.3;HOB=0.125;AC=1;AN=4;DP4=23,29,12,7;MQ=60;ANN=A	synonymous_variant	LOW	Gene_Vitvi01g01006.t01	Gene_Vitvi01g01006.t01	transcript	Vitvi01g01006.t01	Coding	1\2	c.1020G>T	p.Pro340Pro	1034\2834	1020\2726	340\207		WARNING_TRANSCRIPT_MULTIPLE_STOP_CODONS,A	synonymous_variant	LOW	Gene_Vitvi01g01006.t02	Gene_Vitvi01g01006.t02	transcript	Vitvi01g01006.t02	Coding	1\2	c.1020G>T	p.Pro340Pro	1034\2834	1020\2726	340\207		WARNING_TRANSCRIPT_MULTIPLE_STOP_CODONS,A	upstream_gene_variant	MODIFIER	Gene_Vitvi01g01007.t01	Gene_Vitvi01g01007.t01	transcript	Vitvi01g01007.t01	Coding		c.-4863C>A					4854	GT:PL:DP:AD 0\2:255,0,255:40:21,19 0\2:0,93,255:31:31,0
Noirv2.chr1 12336473 . C T 221.0 . DP=71;VDB=0.645276;SGB=8.84268;RPB=0.983842;MQB=1;MQSB=1;BQB=0.783019;MQ0F=0;ICB=0.3;HOB=0.125;AC=1;AN=4;DP4=29,23,8,7;MQ=60;ANN=T	synonymous_variant	LOW	Gene_Vitvi01g01006.t01	Gene_Vitvi01g01006.t01	transcript	Vitvi01g01006.t01	Coding	1\2	c.873G>A	p.Pro291Pro	887\2834	873\2726	291\207		WARNING_TRANSCRIPT_MULTIPLE_STOP_CODONS,T	synonymous_variant	LOW	Gene_Vitvi01g01006.t02	Gene_Vitvi01g01006.t02	transcript	Vitvi01g01006.t02	Coding	1\2	c.873G>A	p.Pro291Pro	887\2834	873\2726	291\207		WARNING_TRANSCRIPT_MULTIPLE_STOP_CODONS,T	upstream_gene_variant	MODIFIER	Gene_Vitvi01g01007.t01	Gene_Vitvi01g01007.t01	transcript	Vitvi01g01007.t01	Coding		c.-4716C>T					4707	GT:PL:DP:AD 0\2:255,0,255:36:21,15 0\2:0,93,255:31:31,0
Noirv2.chr1 12336512 . G A 476.0 . DP=69;VDB=0.227852;SGB=-16.9974;RPB=0.138787;MQB=1;MQSB=1;BQB=0.1704;MQ0F=0;ICB=0.3;HOB=0.125;AC=3;AN=4;DP4=12,6,27,22;MQ=60;ANN=A	synonymous_variant	LOW	Gene_Vitvi01g01006.t01	Gene_Vitvi01g01006.t01	transcript	Vitvi01g01006.t01	Coding	1\2	c.834C>T	p.Leu278Leu	848\2834	834\2726	278\207		WARNING_TRANSCRIPT_MULTIPLE_STOP_CODONS,A	synonymous_variant	LOW	Gene_Vitvi01g01006.t02	Gene_Vitvi01g01006.t02	transcript	Vitvi01g01006.t02	Coding	1\2	c.834C>T	p.Leu278Leu	848\2834	834\2726	278\207		WARNING_TRANSCRIPT_MULTIPLE_STOP_CODONS,A	upstream_gene_variant	MODIFIER	Gene_Vitvi01g01007.t01	Gene_Vitvi01g01007.t01	transcript	Vitvi01g01007.t01	Coding		c.-4677G>A					4668	GT:PL:DP:AD 1\2:255,93,0:31:0,31 0\2:255,0,255:36:18,18
Noirv2.chr1 12336830 . T A 477.0 . DP=61;VDB=0.588027;SGB=-12.0878;RPB=0.933237;MQB=1;MQSB=1;BQB=0.971039;MQ0F=0;ICB=0.5;HOB=0.5;AC=2;AN=4;DP4=12,12,17,16;MQ=60;ANN=A	synonymous_variant	LOW	Gene_Vitvi01g01006.t01	Gene_Vitvi01g01006.t01	transcript	Vitvi01g01006.t01	Coding	1\2	c.516A>T	p.Thr172Thr	530\2834	516\2726	172\207		WARNING_TRANSCRIPT_MULTIPLE_STOP_CODONS,A	synonymous_variant	LOW	Gene_Vitvi01g01006.t02	Gene_Vitvi01g01006.t02	transcript	Vitvi01g01006.t02	Coding	1\2	c.516A>T	p.Thr172Thr	530\2834	516\2726	172\207		WARNING_TRANSCRIPT_MULTIPLE_STOP_CODONS,A	upstream_gene_variant	MODIFIER	Gene_Vitvi01g01007.t01	Gene_Vitvi01g01007.t01	transcript	Vitvi01g01007.t01	Coding		c.-4359T>A					4350	GT:PL:DP:AD 0\2:255,0,225:30:13,17 0\2:255,0,211:27:11,16
Noirv2.chr1 12336880 . G A 440.0 . DP=59;VDB=0.730111;SGB=-9.93983;RPB=0.942397;MQB=1;MQSB=1;BQB=0.971535;MQ0F=0;ICB=0.5;HOB=0.5;AC=2;AN=4;DP4=15,16,14,12;MQ=60;ANN=A	synonymous_variant	LOW	Gene_Vitvi01g01006.t01	Gene_Vitvi01g01006.t01	transcript	Vitvi01g01006.t01	Coding	1\2	c.466C>T	p.Leu156Leu	480\2834	466\2726	156\207		WARNING_TRANSCRIPT_MULTIPLE_STOP_CODONS,A	synonymous_variant	LOW	Gene_Vitvi01g01006.t02	Gene_Vitvi01g01006.t02	transcript	Vitvi01g01006.t02	Coding	1\2	c.466C>T	p.Leu156Leu	480\2834	466\2726	156\207		WARNING_TRANSCRIPT_MULTIPLE_STOP_CODONS,A	upstream_gene_variant	MODIFIER	Gene_Vitvi01g01007.t01	Gene_Vitvi01g01007.t01	transcript	Vitvi01g01007.t01	Coding		c.-4309G>A					4300	GT:PL:DP:AD 0\2:237,0,237:27:13,14 0\2:236,0,255:30:18,12
Noirv2.chr1 12336995 . C T 221.0 . DP=60;VDB=0.281015;SGB=9.53539;RPB=0.763549;MQB=1;MQSB=1;BQB=0.689979;MQ0F=0;ICB=0.3;HOB=0.125;AC=1;AN=4;DP4=25,15,11,5;MQ=60;ANN=T	synonymous_variant	LOW	Gene_Vitvi01g01006.t01	Gene_Vitvi01g01006.t01	transcript	Vitvi01g01006.t01	Coding	1\2	c.351G>A	p.Leu117Leu	365\2834	351\2726	117\207		WARNING_TRANSCRIPT_MULTIPLE_STOP_CODONS,T	synonymous_variant	LOW	Gene_Vitvi01g01006.t02	Gene_Vitvi01g01006.t02	transcript	Vitvi01g01006.t02	Coding	1\2	c.351G>A	p.Leu117Leu	365\2834	351\2726	117\207		WARNING_TRANSCRIPT_MULTIPLE_STOP_CODONS,T	upstream_gene_variant	MODIFIER	Gene_Vitvi01g01007.t01	Gene_Vitvi01g01007.t01	transcript	Vitvi01g01007.t01	Coding		c.-4194C>T					4185	GT:PL:DP:AD 0\2:255,0,254:32:16,16 0\2:0,72,255:24:24,0
Noirv2.chr1 12337004 . C T 221.0 . DP=62;VDB=0.248524;SGB=10.2282;RPB=0.379413;MQB=1;MQSB=1;BQB=0.749068;MQ0F=0;ICB=0.3;HOB=0.125;AC=1;AN=4;DP4=26,15,12,5;MQ=60;ANN=T	synonymous_variant	LOW	Gene_Vitvi01g01006.t01	Gene_Vitvi01g01006.t01	transcript	Vitvi01g01006.t01	Coding	1\2	c.342G>A	p.Glu114Glu	356\2834	342\2726	114\207		WARNING_TRANSCRIPT_MULTIPLE_STOP_CODONS,T	synonymous_variant	LOW	Gene_Vitvi01g01006.t02	Gene_Vitvi01g01006.t02	transcript	Vitvi01g01006.t02	Coding	1\2	c.342G>A	p.Glu114Glu	356\2834	342\2726	114\207		WARNING_TRANSCRIPT_MULTIPLE_STOP_CODONS,T	upstream_gene_variant	MODIFIER	Gene_Vitvi01g01007.t01	Gene_Vitvi01g01007.t01	transcript	Vitvi01g01007.t01	Coding		c.-4185C>T					4176	GT:PL:DP:AD 0\2:255,0,255:36:19,17 0\2:0,66,255:22:22,0
Noirv2.chr1 12337013 . T C 221.0 . DP=63;VDB=0.123095;SGB=9.53539;RPB=0.247296;MQB=1;MQSB=1;BQB=0.790678;MQ0F=0;ICB=0.3;HOB=0.125;AC=1;AN=4;DP4=27,17,11,5;MQ=60;ANN=C	synonymous_variant	LOW	Gene_Vitvi01g01006.t01	Gene_Vitvi01g01006.t01	transcript	Vitvi01g01006.t01	Coding	1\2	c.333A>G	p.Val111Val	347\2834	333\2726	111\207		WARNING_TRANSCRIPT_MULTIPLE_STOP_CODONS,C	synonymous_variant	LOW	Gene_Vitvi01g01006.t02	Gene_Vitvi01g01006.t02	transcript	Vitvi01g01006.t02	Coding	1\2	c.333A>G	p.Val111Val	347\2834	333\2726	111\207		WARNING_TRANSCRIPT_MULTIPLE_STOP_CODONS,C	upstream_gene_variant	MODIFIER	Gene_Vitvi01g01007.t01	Gene_Vitvi01g01007.t01	transcript	Vitvi01g01007.t01	Coding		c.-4176T>C					4167	GT:PL:DP:AD 0\2:255,0,255:36:20,16 0\2:0,72,255:24:24,0
Noirv2.chr1 12337049 . G C 221.0 . DP=62;VDB=0.92835;SGB=10.2282;RPB=0.942387;MQB=1;MQSB=1;BQB=0.844024;MQ0F=0;ICB=0.3;HOB=0.125;AC=1;AN=4;DP4=24,19,11,6;MQ=60;ANN=C	synonymous_variant	LOW	Gene_Vitvi01g01006.t01	Gene_Vitvi01g01006.t01	transcript	Vitvi01g01006.t01	Coding	1\2	c.297C>G	p.Val99Val	311\2834	297\2726	99\207		WARNING_TRANSCRIPT_MULTIPLE_STOP_CODONS,C	synonymous_variant	LOW	Gene_Vitvi01g01006.t02	Gene_Vitvi01g01006.t02	transcript	Vitvi01g01006.t02	Coding	1\2	c.297C>G	p.Val99Val	311\2834	297\2726	99\207		WARNING_TRANSCRIPT_MULTIPLE_STOP_CODONS,C	upstream_gene_variant	MODIFIER	Gene_Vitvi01g01007.t01	Gene_Vitvi01g01007.t01	transcript	Vitvi01g01007.t01	Coding		c.-4140G>C					4131	GT:PL:DP:AD 0\2:255,0,255:36:19,17 0\2:0,72,255:24:24,0
Noirv2.chr1 12337097 . G A 221.0 . DP=66;VDB=0.687803;SGB=8.84268;RPB=0.981425;MQB=1;MQSB=1;BQB=0.864049;MQ0F=0;ICB=0.3;HOB=0.125;AC=1;AN=4;DP4=27,21,8,7;MQ=60;ANN=A	synonymous_variant	LOW	Gene_Vitvi01g01006.t01	Gene_Vitvi01g01006.t01	transcript	Vitvi01g01006.t01	Coding	1\2	c.249C>T	p.Cys83Cys	263\2834	249\2726	83\207		WARNING_TRANSCRIPT_MULTIPLE_STOP_CODONS,A	synonymous_variant	LOW	Gene_Vitvi01g01006.t02	Gene_Vitvi01g01006.t02	transcript	Vitvi01g01006.t02	Coding	1\2	c.249C>T	p.Cys83Cys	263\2834	249\2726	83\207		WARNING_TRANSCRIPT_MULTIPLE_STOP_CODONS,A	upstream_gene_variant	MODIFIER	Gene_Vitvi01g01007.t01	Gene_Vitvi01g01007.t01	transcript	Vitvi01g01007.t01	Coding		c.-4092G>A					4083	GT:PL:DP:AD 0\2:0,99,255:33:33,0 0\2:255,0,243:30:15,15
Noirv2.chr1 12337280 . C T 483.0 . DP=56;VDB=0.182647;SGB=-1.38297;MQSB=1;MQ0F=0;AC=4;AN=4;DP4=0,0,20,33;MQ=60;ANN=T	synonymous_variant	LOW	Gene_Vitvi01g01006.t01	Gene_Vitvi01g01006.t01	transcript	Vitvi01g01006.t01	Coding	1\2	c.66G>A	p.Arg22Arg	80\2834	66\2726	22\207		WARNING_TRANSCRIPT_MULTIPLE_STOP_CODONS,T	synonymous_variant	LOW	Gene_Vitvi01g01006.t02	Gene_Vitvi01g01006.t02	transcript	Vitvi01g01006.t02	Coding	1\2	c.66G>A	p.Arg22Arg	80\2834	66\2726	22\207		WARNING_TRANSCRIPT_MULTIPLE_STOP_CODONS,T	upstream_gene_variant	MODIFIER	Gene_Vitvi01g01007.t01	Gene_Vitvi01g01007.t01	transcript	Vitvi01g01007.t01	Coding		c.-3909C>T					3900	GT:PL:DP:AD 1\2:255,93,0:31:0,31 1\2:255,66,0:22:0,22
Noirv2.chr1 12337318 . G A 483.0 . DP=65;VDB=0.1805;SGB=-1.38593;MQSB=1;MQ0F=0;AC=4;AN=4;DP4=0,0,27,36;MQ=60;ANN=A	synonymous_variant	LOW	Gene_Vitvi01g01006.t01	Gene_Vitvi01g01006.t01	transcript	Vitvi01g01006.t01	Coding	1\2	c.28C>T	p.Leu10Leu	42\2834	28\2726	10\207		WARNING_TRANSCRIPT_MULTIPLE_STOP_CODONS,A	synonymous_variant	LOW	Gene_Vitvi01g01006.t02	Gene_Vitvi01g01006.t02	transcript	Vitvi01g01006.t02	Coding	1\2	c.28C>T	p.Leu10Leu	42\2834	28\2726	10\207		WARNING_TRANSCRIPT_MULTIPLE_STOP_CODONS,A	upstream_gene_variant	MODIFIER	Gene_Vitvi01g01007.t01	Gene_Vitvi01g01007.t01	transcript	Vitvi01g01007.t01	Coding		c.-3871G>A					3862	GT:PL:DP:AD 1\2:255,105,0:35:0,35 1\2:255,84,0:28:0,28
Noirv2.chr1 12341251 . T A 261.0 . DP=17;VDB=0.615791;SGB=0.485261;MQSB=0.851779;MQ0F=0;AC=4;AN=4;DP4=0,0,5,11;MQ=51;ANN=A	synonymous_variant	LOW	Gene_Vitvi01g01007.t01	Gene_Vitvi01g01007.t01	transcript	Vitvi01g01007.t01	Coding	1\2	c.63T>A	p.Ile21Ile	72\237	63\287	21\228		,A	upstream_gene_variant	MODIFIER	Gene_Vitvi01g01006.t01	Gene_Vitvi01g01006.t01	transcript	Vitvi01g01006.t01	Coding		c.-3906A>T					3892	WARNING_TRANSCRIPT_MULTIPLE_STOP_CODONS,A	upstream_gene_variant	MODIFIER	Gene_Vitvi01g01006.t02	Gene_Vitvi01g01006.t02	transcript	Vitvi01g01006.t02	Coding		c.-3906A>T					3892	WARNING_TRANSCRIPT_MULTIPLE_STOP_CODONS GT:PL:DP:AD 1\2:255,45,0:15:0,15 1\2:33,3,0:1:0,1
Noirv2.chr1 12341356 . G C 3.43611 . DP=22;VDB=0.14;SGB=-2.48712;RPB=0.315789;MQB=0.131579;MQSB=0.853271;BQB=0.526316;MQ0F=0;ICB=0.5;HOB=0.5;AC=2;AN=4;DP4=10,9,0,2;MQ=46;ANN=C	synonymous_variant	LOW	Gene_Vitvi01g01007.t01	Gene_Vitvi01g01007.t01	transcript	Vitvi01g01007.t01	Coding	1\2	c.168G>C	p.Val56Val	177\237	168\287	56\228		,C	upstream_gene_variant	MODIFIER	Gene_Vitvi01g01006.t01	Gene_Vitvi01g01006.t01	transcript	Vitvi01g01006.t01	Coding		c.-4011C>G					3997	WARNING_TRANSCRIPT_MULTIPLE_STOP_CODONS,C	upstream_gene_variant	MODIFIER	Gene_Vitvi01g01006.t02	Gene_Vitvi01g01006.t02	transcript	Vitvi01g01006.t02	Coding		c.-4011C>G					3997	WARNING_TRANSCRIPT_MULTIPLE_STOP_CODONS GT:PL:DP:AD 0\2:0,23,255:20:19,1 1\2:37,3,0:1:0,1
Noirv2.chr1 12341452 . G T 219.0 . DP=18;VDB=0.507603;SGB=9.08363;RPB=1;MQB=1;MQSB=0.840907;BQB=1;MQ0F=0;ICB=0.3;HOB=0.125;AC=3;AN=4;DP4=0,1,7,10;MQ=52;ANN=T	synonymous_variant	LOW	Gene_Vitvi01g01007.t01	Gene_Vitvi01g01007.t01	transcript	Vitvi01g01007.t01	Coding	1\2	c.264G>T	p.Pro88Pro	273\237	264\287	88\228		,T	upstream_gene_variant	MODIFIER	Gene_Vitvi01g01006.t01	Gene_Vitvi01g01006.t01	transcript	Vitvi01g01006.t01	Coding		c.-4107C>A					4093	WARNING_TRANSCRIPT_MULTIPLE_STOP_CODONS,T	upstream_gene_variant	MODIFIER	Gene_Vitvi01g01006.t02	Gene_Vitvi01g01006.t02	transcript	Vitvi01g01006.t02	Coding		c.-4107C>A					4093	WARNING_TRANSCRIPT_MULTIPLE_STOP_CODONS GT:PL:DP:AD 1\2:255,51,0:17:0,17 0\2:0,3,37:1:1,0
Noirv2.chr1 12341473 . T C 228.0 . DP=18;VDB=0.474005;SGB=9.08363;MQSB=0.737299;MQ0F=0;AC=2;AN=2;DP4=0,0,7,10;MQ=52;ANN=C	synonymous_variant	LOW	Gene_Vitvi01g01007.t01	Gene_Vitvi01g01007.t01	transcript	Vitvi01g01007.t01	Coding	1\2	c.285T>C	p.Ala95Ala	294\237	285\287	95\228		,C	upstream_gene_variant	MODIFIER	Gene_Vitvi01g01006.t01	Gene_Vitvi01g01006.t01	transcript	Vitvi01g01006.t01	Coding		c.-4128A>G					4114	WARNING_TRANSCRIPT_MULTIPLE_STOP_CODONS,C	upstream_gene_variant	MODIFIER	Gene_Vitvi01g01006.t02	Gene_Vitvi01g01006.t02	transcript	Vitvi01g01006.t02	Coding		c.-4128A>G					4114	WARNING_TRANSCRIPT_MULTIPLE_STOP_CODONS GT:PL:DP:AD 1\2:255,51,0:17:0,17 ./.:0,0,0:0:0,0
Noirv2.chr1 12341630 . G C 228.0 . DP=20;VDB=0.852686;SGB=10.4471;MQSB=0.829029;MQ0F=0;AC=2;AN=2;DP4=0,0,9,10;MQ=54;ANN=C	splice_region_variant&intron_variant	LOW	Gene_Vitvi01g01007.t01	Gene_Vitvi01g01007.t01	transcript	Vitvi01g01007.t01	Coding	1\2	c.322-8G>C						,C	upstream_gene_variant	MODIFIER	Gene_Vitvi01g01006.t01	Gene_Vitvi01g01006.t01	transcript	Vitvi01g01006.t01	Coding		c.-4285C>G					4271	WARNING_TRANSCRIPT_MULTIPLE_STOP_CODONS,C	upstream_gene_variant	MODIFIER	Gene_Vitvi01g01006.t02	Gene_Vitvi01g01006.t02	transcript	Vitvi01g01006.t02	Coding		c.-4285C>G					4271	WARNING_TRANSCRIPT_MULTIPLE_STOP_CODONS GT:PL:DP:AD 1\2:255,57,0:19:0,19 ./.:0,0,0:0:0,0
Noirv2.chr1 12341718 . T C 208.0 . DP=17;VDB=0.897589;SGB=5.72994;RPB=0.241177;MQB=0.286505;MQSB=0.890706;BQB=0.36331;MQ0F=0;ICB=0.3;HOB=0.125;AC=1;AN=4;DP4=5,0,4,8;MQ=42;ANN=C	synonymous_variant	LOW	Gene_Vitvi01g01007.t01	Gene_Vitvi01g01007.t01	transcript	Vitvi01g01007.t01	Coding	2\2	c.402T>C	p.Leu134Leu	411\237	402\287	134\228		,C	upstream_gene_variant	MODIFIER	Gene_Vitvi01g01006.t01	Gene_Vitvi01g01006.t01	transcript	Vitvi01g01006.t01	Coding		c.-4373A>G					4359	WARNING_TRANSCRIPT_MULTIPLE_STOP_CODONS,C	upstream_gene_variant	MODIFIER	Gene_Vitvi01g01006.t02	Gene_Vitvi01g01006.t02	transcript	Vitvi01g01006.t02	Coding		c.-4373A>G					4359	WARNING_TRANSCRIPT_MULTIPLE_STOP_CODONS GT:PL:DP:AD 0\2:242,0,1:13:1,12 0\2:0,12,118:4:4,0
Noirv2.chr1 12341754 . A T 118.0 . DP=14;VDB=0.19611;SGB=-3.79454;RPB=0.991701;MQB=0.997919;MQSB=0.981425;BQB=0.811936;MQ0F=0;ICB=0.3;HOB=0.125;AC=3;AN=4;DP4=2,6,6,0;MQ=40;ANN=T	synonymous_variant	LOW	Gene_Vitvi01g01007.t01	Gene_Vitvi01g01007.t01	transcript	Vitvi01g01007.t01	Coding	2\2	c.438A>T	p.Pro146Pro	447\237	438\287	146\228		,T	upstream_gene_variant	MODIFIER	Gene_Vitvi01g01006.t01	Gene_Vitvi01g01006.t01	transcript	Vitvi01g01006.t01	Coding		c.-4409T>A					4395	WARNING_TRANSCRIPT_MULTIPLE_STOP_CODONS,T	upstream_gene_variant	MODIFIER	Gene_Vitvi01g01006.t02	Gene_Vitvi01g01006.t02	transcript	Vitvi01g01006.t02	Coding		c.-4409T>A					4395	WARNING_TRANSCRIPT_MULTIPLE_STOP_CODONS GT:PL:DP:AD 0\2:42,0,180:10:8,2 1\2:110,12,0:4:0,4
Noirv2.chr1 12341856 . G T 96.0 . DP=17;VDB=0.5413;SGB=2.63044;RPB=0.828239;MQB=0.899815;MQSB=0.989343;BQB=0.961166;MQ0F=0;ICB=0.3;HOB=0.125;AC=1;AN=4;DP4=7,0,1,5;MQ=34;ANN=T	synonymous_variant	LOW	Gene_Vitvi01g01007.t01	Gene_Vitvi01g01007.t01	transcript	Vitvi01g01007.t01	Coding	2\2	c.540G>T	p.Val180Val	549\237	540\287	180\228		,T	upstream_gene_variant	MODIFIER	Gene_Vitvi01g01006.t01	Gene_Vitvi01g01006.t01	transcript	Vitvi01g01006.t01	Coding		c.-4511C>A					4497	WARNING_TRANSCRIPT_MULTIPLE_STOP_CODONS,T	upstream_gene_variant	MODIFIER	Gene_Vitvi01g01006.t02	Gene_Vitvi01g01006.t02	transcript	Vitvi01g01006.t02	Coding		c.-4511C>A					4497	WARNING_TRANSCRIPT_MULTIPLE_STOP_CODONS GT:PL:DP:AD 0\2:130,0,59:9:3,6 0\2:0,12,85:4:4,0
Noirv2.chr1 12350618 . A G 475.0 . DP=29;VDB=1.43095e-05;SGB=-1.36128;RPB=1;MQB=1;MQSB=0.697666;BQB=1;MQ0F=0;AC=4;AN=4;DP4=0,1,14,10;MQ=50;ANN=G	synonymous_variant	LOW	Gene_Vitvi01g02131.t01	Gene_Vitvi01g02131.t01	transcript	Vitvi01g02131.t01	Coding	1\2	c.69A>G	p.Leu23Leu	100\207	69\287	23\228		GT:PL:DP:AD 1\2:255,23,0:13:1,12 1\2:244,36,0:12:0,12
Noirv2.chr1 12350651 . C T 294.0 . DP=17;VDB=0.99995;SGB=-1.24714;RPB=1;MQB=1;MQSB=0.68614;BQB=1;MQ0F=0;AC=4;AN=4;DP4=0,1,7,7;MQ=36;ANN=T	synonymous_variant	LOW	Gene_Vitvi01g02131.t01	Gene_Vitvi01g02131.t01	transcript	Vitvi01g02131.t01	Coding	1\2	c.102C>T	p.Tyr34Tyr	133\207	102\287	34\228		GT:PL:DP:AD 1\2:120,6,0:7:1,6 1\2:198,24,0:8:0,8
Noirv2.chr1 12350657 . A G 286.0 . DP=14;VDB=0.999867;SGB=-1.24744;RPB=1;MQB=1;MQSB=0.30295;BQB=1;MQ0F=0;AC=4;AN=4;DP4=0,1,7,6;MQ=32;ANN=G	synonymous_variant	LOW	Gene_Vitvi01g02131.t01	Gene_Vitvi01g02131.t01	transcript	Vitvi01g02131.t01	Coding	1\2	c.108A>G	p.Glu36Glu	139\207	108\287	36\228		GT:PL:DP:AD 1\2:145,9,0:8:1,7 1\2:165,18,0:6:0,6
Noirv2.chr1 12350664 . C T 237.0 . DP=12;VDB=0.653136;SGB=-1.13854;RPB=1;MQB=1;MQSB=0.442128;BQB=1;MQ0F=0;AC=4;AN=4;DP4=0,1,4,6;MQ=31;ANN=T	synonymous_variant	LOW	Gene_Vitvi01g02131.t01	Gene_Vitvi01g02131.t01	transcript	Vitvi01g02131.t01	Coding	1\2	c.115C>T	p.Leu39Leu	146\207	115\287	39\228		GT:PL:DP:AD 1\2:128,6,0:7:1,6 1\2:133,12,0:4:0,4
Noirv2.chr1 12350687 . G A 356.0 . DP=17;VDB=0.00187095;SGB=-1.21711;RPB=1;MQB=1;MQSB=0.0775593;BQB=1;MQ0F=0;AC=4;AN=4;DP4=0,1,8,8;MQ=37;ANN=A	synonymous_variant	LOW	Gene_Vitvi01g02131.t01	Gene_Vitvi01g02131.t01	transcript	Vitvi01g02131.t01	Coding	1\2	c.138G>A	p.Leu46Leu	169\207	138\287	46\228		GT:PL:DP:AD 1\2:217,17,0:11:1,10 1\2:163,18,0:6:0,6
Noirv2.chr1 12350717 . G C 440.0 . DP=21;VDB=0.00337846;SGB=-1.27591;MQSB=0.401874;MQ0F=0;AC=4;AN=4;DP4=0,0,9,12;MQ=42;ANN=C	synonymous_variant	LOW	Gene_Vitvi01g02131.t01	Gene_Vitvi01g02131.t01	transcript	Vitvi01g02131.t01	Coding	1\2	c.168G>C	p.Val56Val	199\207	168\287	56\228		GT:PL:DP:AD 1\2:255,39,0:13:0,13 1\2:212,24,0:8:0,8
Noirv2.chr1 12350720 . C T 446.0 . DP=22;VDB=0.00337846;SGB=-1.27591;MQSB=0.401874;MQ0F=0;AC=4;AN=4;DP4=0,0,9,12;MQ=42;ANN=T	synonymous_variant	LOW	Gene_Vitvi01g02131.t01	Gene_Vitvi01g02131.t01	transcript	Vitvi01g02131.t01	Coding	1\2	c.171C>T	p.Pro57Pro	202\207	171\287	57\228		GT:PL:DP:AD 1\2:255,39,0:13:0,13 1\2:218,24,0:8:0,8
Noirv2.chr1 12350732 . C T 390.0 . DP=28;VDB=0.121739;SGB=-1.14335;RPB=0.325603;MQB=0.969312;MQSB=0.569609;BQB=0.882783;MQ0F=0;ICB=0.3;HOB=0.125;AC=3;AN=4;DP4=2,3,9,13;MQ=44;ANN=T	synonymous_variant	LOW	Gene_Vitvi01g02131.t01	Gene_Vitvi01g02131.t01	transcript	Vitvi01g02131.t01	Coding	1\2	c.183C>T	p.His61His	214\207	183\287	61\228		GT:PL:DP:AD 1\2:255,45,0:15:0,15 0\2:169,0,120:12:5,7
Noirv2.chr1 12351012 . C T 471.0 . DP=36;VDB=0.024907;SGB=-1.27464;RPB=0.28125;MQB=0.03125;MQSB=0.461677;BQB=0.78125;MQ0F=0;ICB=0.3;HOB=0.125;AC=3;AN=4;DP4=2,0,20,12;MQ=49;ANN=T	synonymous_variant	LOW	Gene_Vitvi01g02131.t01	Gene_Vitvi01g02131.t01	transcript	Vitvi01g02131.t01	Coding	2\2	c.336C>T	p.Ile112Ile	367\207	336\287	112\228		GT:PL:DP:AD 0\2:250,0,12:13:2,11 1\2:255,63,0:21:0,21
Noirv2.chr1 12351114 . A T 406.0 . DP=29;VDB=0.549521;SGB=-8.09871;RPB=0.266032;MQB=0.504568;MQSB=0.148575;BQB=0.88985;MQ0F=0;ICB=0.5;HOB=0.5;AC=2;AN=4;DP4=7,1,7,13;MQ=37;ANN=T	synonymous_variant	LOW	Gene_Vitvi01g02131.t01	Gene_Vitvi01g02131.t01	transcript	Vitvi01g02131.t01	Coding	2\2	c.438A>T	p.Pro146Pro	469\207	438\287	146\228		GT:PL:DP:AD 0\2:211,0,31:11:2,9 0\2:230,0,121:17:6,11
Noirv2.chr1 12351249 . C T 31.8372 . DP=31;VDB=0.23997;SGB=1.27626;RPB=0.0612309;MQB=0.61575;MQSB=0.845039;BQB=0.51684;MQ0F=0;ICB=0.3;HOB=0.125;AC=1;AN=4;DP4=12,12,0,4;MQ=44;ANN=T	synonymous_variant	LOW	Gene_Vitvi01g02131.t01	Gene_Vitvi01g02131.t01	transcript	Vitvi01g02131.t01	Coding	2\2	c.573C>T	p.Cys191Cys	604\207	573\287	191\228		GT:PL:DP:AD 0\2:0,51,255:17:17,0 0\2:66,0,173:11:7,4
Noirv2.chr1 12367909 . A T 19.8787 . DP=53;VDB=0.0152419;SGB=1.94933;RPB=0.0233388;MQB=0.89165;MQSB=0.829716;BQB=0.255729;MQ0F=0;ICB=0.3;HOB=0.125;AC=1;AN=4;DP4=22,22,1,4;MQ=51;ANN=T	5_prime_UTR_premature_start_codon_gain_variant	LOW	Gene_Vitvi01g02132.t01	Gene_Vitvi01g02132.t01	transcript	Vitvi01g02132.t01	Coding	1\2	c.-19A>T						WARNING_TRANSCRIPT_MULTIPLE_STOP_CODONS,T	5_prime_UTR_variant	MODIFIER	Gene_Vitvi01g02132.t01	Gene_Vitvi01g02132.t01	transcript	Vitvi01g02132.t01	Coding	1\2	c.-19A>T					19	WARNING_TRANSCRIPT_MULTIPLE_STOP_CODONS,T	downstream_gene_variant	MODIFIER	Gene_Vitvi01g01008.t01	Gene_Vitvi01g01008.t01	transcript	Vitvi01g01008.t01	Coding		c.*4247T>A					3938	WARNING_TRANSCRIPT_MULTIPLE_STOP_CODONS GT:PL:DP:AD 0\2:56,0,255:30:25,5 0\2:0,57,255:19:19,0
Noirv2.chr1 12368083 . G C 6.01563 . DP=63;VDB=0.101965;SGB=-3.79454;RPB=0.718492;MQB=0.412613;MQSB=0.999973;BQB=0.863351;MQ0F=0;ICB=0.3;HOB=0.125;AC=1;AN=4;DP4=25,29,5,1;MQ=59;ANN=C	synonymous_variant	LOW	Gene_Vitvi01g02132.t01	Gene_Vitvi01g02132.t01	transcript	Vitvi01g02132.t01	Coding	1\2	c.156G>C	p.Val52Val	206\287	156\283	52\226		WARNING_TRANSCRIPT_MULTIPLE_STOP_CODONS,C	downstream_gene_variant	MODIFIER	Gene_Vitvi01g01008.t01	Gene_Vitvi01g01008.t01	transcript	Vitvi01g01008.t01	Coding		c.*4073C>G					3764	WARNING_TRANSCRIPT_MULTIPLE_STOP_CODONS GT:PL:DP:AD 0\2:0,20,255:31:29,2 0\2:40,0,255:29:25,4
Noirv2.chr1 12368101 . G A 10.4245 . DP=56;VDB=0.101965;SGB=-3.79454;RPB=0.141872;MQB=0.468411;MQSB=0.967709;BQB=0.309123;MQ0F=0;ICB=0.3;HOB=0.125;AC=1;AN=4;DP4=21,25,5,1;MQ=58;ANN=A	synonymous_variant	LOW	Gene_Vitvi01g02132.t01	Gene_Vitvi01g02132.t01	transcript	Vitvi01g02132.t01	Coding	1\2	c.174G>A	p.Val58Val	224\287	174\283	58\226		WARNING_TRANSCRIPT_MULTIPLE_STOP_CODONS,A	downstream_gene_variant	MODIFIER	Gene_Vitvi01g01008.t01	Gene_Vitvi01g01008.t01	transcript	Vitvi01g01008.t01	Coding		c.*4055C>T					3746	WARNING_TRANSCRIPT_MULTIPLE_STOP_CODONS GT:PL:DP:AD 0\2:0,15,255:27:25,2 0\2:45,0,255:25:21,4
Noirv2.chr1 12368191 . A G 176.0 . DP=50;VDB=0.805081;SGB=4.69269;RPB=0.794444;MQB=0.59166;MQSB=0.906468;BQB=0.340662;MQ0F=0;ICB=0.3;HOB=0.125;AC=1;AN=4;DP4=15,22,5,4;MQ=59;ANN=G	synonymous_variant	LOW	Gene_Vitvi01g02132.t01	Gene_Vitvi01g02132.t01	transcript	Vitvi01g02132.t01	Coding	1\2	c.264A>G	p.Pro88Pro	314\287	264\283	88\226		WARNING_TRANSCRIPT_MULTIPLE_STOP_CODONS,G	downstream_gene_variant	MODIFIER	Gene_Vitvi01g01008.t01	Gene_Vitvi01g01008.t01	transcript	Vitvi01g01008.t01	Coding		c.*3965T>C					3656	WARNING_TRANSCRIPT_MULTIPLE_STOP_CODONS GT:PL:DP:AD 0\2:210,0,255:27:18,9 0\2:0,57,255:19:19,0
Noirv2.chr1 12368405 . G A 4.10354 . DP=53;VDB=0.00299537;SGB=-3.79454;RPB=0.269989;MQB=0.00440714;MQSB=0.492852;BQB=0.834531;MQ0F=0;ICB=0.3;HOB=0.125;AC=1;AN=4;DP4=26,20,0,6;MQ=59;ANN=A	synonymous_variant	LOW	Gene_Vitvi01g02132.t01	Gene_Vitvi01g02132.t01	transcript	Vitvi01g02132.t01	Coding	2\2	c.357G>A	p.Lys119Lys	407\287	357\283	119\226		WARNING_TRANSCRIPT_MULTIPLE_STOP_CODONS,A	downstream_gene_variant	MODIFIER	Gene_Vitvi01g01008.t01	Gene_Vitvi01g01008.t01	transcript	Vitvi01g01008.t01	Coding		c.*3751C>T					3442	WARNING_TRANSCRIPT_MULTIPLE_STOP_CODONS GT:PL:DP:AD 0\2:0,0,255:23:21,2 0\2:36,0,255:29:25,4
Noirv2.chr1 12368513 . A C 194.0 . DP=49;VDB=0.0033126;SGB=6.07412;RPB=0.999917;MQB=0.00283595;MQSB=0.962367;BQB=0.973499;MQ0F=0;ICB=0.3;HOB=0.125;AC=1;AN=4;DP4=15,20,5,6;MQ=57;ANN=C	synonymous_variant	LOW	Gene_Vitvi01g02132.t01	Gene_Vitvi01g02132.t01	transcript	Vitvi01g02132.t01	Coding	2\2	c.465A>C	p.Ala155Ala	515\287	465\283	155\226		WARNING_TRANSCRIPT_MULTIPLE_STOP_CODONS,C	downstream_gene_variant	MODIFIER	Gene_Vitvi01g01008.t01	Gene_Vitvi01g01008.t01	transcript	Vitvi01g01008.t01	Coding		c.*3643T>G					3334	WARNING_TRANSCRIPT_MULTIPLE_STOP_CODONS GT:PL:DP:AD 0\2:0,81,255:27:27,0 0\2:228,0,120:19:8,11
Noirv2.chr1 12368549 . T G 463.0 . DP=62;VDB=0.360336;SGB=-12.7015;RPB=0.901704;MQB=0.216403;MQSB=0.978042;BQB=0.986281;MQ0F=0;ICB=0.3;HOB=0.125;AC=3;AN=4;DP4=11,9,15,20;MQ=57;ANN=G	synonymous_variant	LOW	Gene_Vitvi01g02132.t01	Gene_Vitvi01g02132.t01	transcript	Vitvi01g02132.t01	Coding	2\2	c.501T>G	p.Val167Val	551\287	501\283	167\226		WARNING_TRANSCRIPT_MULTIPLE_STOP_CODONS,G	downstream_gene_variant	MODIFIER	Gene_Vitvi01g01008.t01	Gene_Vitvi01g01008.t01	transcript	Vitvi01g01008.t01	Coding		c.*3607A>C					3298	WARNING_TRANSCRIPT_MULTIPLE_STOP_CODONS GT:PL:DP:AD 0\2:242,0,255:31:20,11 1\2:255,72,0:24:0,24
Noirv2.chr1 12368555 . A C 468.0 . DP=60;VDB=0.498181;SGB=-13.0084;RPB=1;MQB=0.255729;MQSB=0.985127;BQB=0.876353;MQ0F=0;ICB=0.3;HOB=0.125;AC=3;AN=4;DP4=10,8,16,20;MQ=57;ANN=C	synonymous_variant	LOW	Gene_Vitvi01g02132.t01	Gene_Vitvi01g02132.t01	transcript	Vitvi01g02132.t01	Coding	2\2	c.507A>C	p.Ala169Ala	557\287	507\283	169\226		WARNING_TRANSCRIPT_MULTIPLE_STOP_CODONS,C	downstream_gene_variant	MODIFIER	Gene_Vitvi01g01008.t01	Gene_Vitvi01g01008.t01	transcript	Vitvi01g01008.t01	Coding		c.*3601T>G					3292	WARNING_TRANSCRIPT_MULTIPLE_STOP_CODONS GT:PL:DP:AD 0\2:247,0,255:29:18,11 1\2:255,75,0:25:0,25
Noirv2.chr1 12368985 . A G 391.0 . DP=51;VDB=0.965968;SGB=-8.40557;RPB=0.994911;MQB=1;MQSB=1;BQB=0.750519;MQ0F=0;ICB=0.5;HOB=0.5;AC=2;AN=4;DP4=17,11,12,9;MQ=60;ANN=G	splice_region_variant	LOW	Gene_Vitvi01g02132.t01	Gene_Vitvi01g02132.t01	transcript	Vitvi01g02132.t01	Coding	2\2	c.*254A>G						WARNING_TRANSCRIPT_MULTIPLE_STOP_CODONS,G	3_prime_UTR_variant	MODIFIER	Gene_Vitvi01g02132.t01	Gene_Vitvi01g02132.t01	transcript	Vitvi01g02132.t01	Coding	2\2	c.*254A>G					254	WARNING_TRANSCRIPT_MULTIPLE_STOP_CODONS,G	downstream_gene_variant	MODIFIER	Gene_Vitvi01g01008.t01	Gene_Vitvi01g01008.t01	transcript	Vitvi01g01008.t01	Coding		c.*3171T>C					2862	WARNING_TRANSCRIPT_MULTIPLE_STOP_CODONS GT:PL:DP:AD 0\2:221,0,255:31:19,12 0\2:203,0,195:18:9,9
Noirv2.chr1 12371848 . C T 221.0 . DP=66;VDB=0.326966;SGB=15.0794;RPB=0.964891;MQB=1;MQSB=1;BQB=1;MQ0F=0;ICB=0.3;HOB=0.125;AC=1;AN=4;DP4=21,17,11,13;MQ=60;ANN=T	splice_region_variant	LOW	Gene_Vitvi01g01008.t01	Gene_Vitvi01g01008.t01	transcript	Vitvi01g01008.t01	Coding	4\2	c.*308G>A						WARNING_TRANSCRIPT_MULTIPLE_STOP_CODONS,T	3_prime_UTR_variant	MODIFIER	Gene_Vitvi01g01008.t01	Gene_Vitvi01g01008.t01	transcript	Vitvi01g01008.t01	Coding	4\2	c.*308G>A					308	WARNING_TRANSCRIPT_MULTIPLE_STOP_CODONS,T	downstream_gene_variant	MODIFIER	Gene_Vitvi01g02132.t01	Gene_Vitvi01g02132.t01	transcript	Vitvi01g02132.t01	Coding		c.*3117C>T					2863	WARNING_TRANSCRIPT_MULTIPLE_STOP_CODONS GT:PL:DP:AD 0\2:255,0,244:36:12,24 0\2:0,78,255:26:26,0
Noirv2.chr1 12375917 . G A 442.0 . DP=55;VDB=0.297194;SGB=-10.2467;RPB=0.89468;MQB=0.793923;MQSB=0.999241;BQB=0.972561;MQ0F=0;ICB=0.5;HOB=0.5;AC=2;AN=4;DP4=18,6,14,13;MQ=57;ANN=A	splice_region_variant&intron_variant	LOW	Gene_Vitvi01g01008.t01	Gene_Vitvi01g01008.t01	transcript	Vitvi01g01008.t01	Coding	2\2	c.158+6C>T						WARNING_TRANSCRIPT_MULTIPLE_STOP_CODONS,A	downstream_gene_variant	MODIFIER	Gene_Vitvi01g01009.t01	Gene_Vitvi01g01009.t01	transcript	Vitvi01g01009.t01	Coding		c.*4023C>T					3795	GT:PL:DP:AD 0\2:255,0,208:31:14,17 0\2:220,0,208:20:10,10
Noirv2.chr1 12376216 . G C 221.0 . DP=57;VDB=0.831558;SGB=9.53539;RPB=0.999957;MQB=1;MQSB=1;BQB=0.886407;MQ0F=0;ICB=0.3;HOB=0.125;AC=1;AN=4;DP4=20,19,7,9;MQ=60;ANN=C	5_prime_UTR_premature_start_codon_gain_variant	LOW	Gene_Vitvi01g01008.t01	Gene_Vitvi01g01008.t01	transcript	Vitvi01g01008.t01	Coding	1\2	c.-5C>G						WARNING_TRANSCRIPT_MULTIPLE_STOP_CODONS,C	5_prime_UTR_variant	MODIFIER	Gene_Vitvi01g01008.t01	Gene_Vitvi01g01008.t01	transcript	Vitvi01g01008.t01	Coding	1\2	c.-5C>G					5	WARNING_TRANSCRIPT_MULTIPLE_STOP_CODONS,C	downstream_gene_variant	MODIFIER	Gene_Vitvi01g01009.t01	Gene_Vitvi01g01009.t01	transcript	Vitvi01g01009.t01	Coding		c.*3724C>G					3496	GT:PL:DP:AD 0\2:255,0,243:30:14,16 0\2:0,75,255:25:25,0
Noirv2.chr1 12379714 . C T 221.0 . DP=65;VDB=0.794336;SGB=11.6141;RPB=0.473643;MQB=1;MQSB=1;BQB=0.998909;MQ0F=0;ICB=0.3;HOB=0.125;AC=1;AN=4;DP4=22,20,12,7;MQ=60;ANN=T	splice_region_variant	LOW	Gene_Vitvi01g01009.t01	Gene_Vitvi01g01009.t01	transcript	Vitvi01g01009.t01	Coding	5\2	c.*226G>A						,T	3_prime_UTR_variant	MODIFIER	Gene_Vitvi01g01009.t01	Gene_Vitvi01g01009.t01	transcript	Vitvi01g01009.t01	Coding	5\2	c.*226G>A					226	,T	upstream_gene_variant	MODIFIER	Gene_Vitvi01g01008.t01	Gene_Vitvi01g01008.t01	transcript	Vitvi01g01008.t01	Coding		c.-3503G>A					3418	WARNING_TRANSCRIPT_MULTIPLE_STOP_CODONS GT:PL:DP:AD 0\2:255,0,255:41:22,19 0\2:0,60,255:20:20,0
Noirv2.chr1 12380063 . C T 202.0 . DP=76;VDB=0.703805;SGB=7.4578;RPB=0.699322;MQB=1;MQSB=1;BQB=0.522003;MQ0F=0;ICB=0.3;HOB=0.125;AC=1;AN=4;DP4=31,26,7,6;MQ=60;ANN=T	synonymous_variant	LOW	Gene_Vitvi01g01009.t01	Gene_Vitvi01g01009.t01	transcript	Vitvi01g01009.t01	Coding	5\2	c.2541G>A	p.Ser847Ser	2541\2892	2541\2664	847\287		,T	upstream_gene_variant	MODIFIER	Gene_Vitvi01g01008.t01	Gene_Vitvi01g01008.t01	transcript	Vitvi01g01008.t01	Coding		c.-3852G>A					3767	WARNING_TRANSCRIPT_MULTIPLE_STOP_CODONS GT:PL:DP:AD 0\2:0,123,255:41:41,0 0\2:236,0,255:29:16,13
Noirv2.chr1 12380108 . T C 126.0 . DP=72;VDB=0.669559;SGB=3.31571;RPB=0.997075;MQB=1;MQSB=1;BQB=0.662397;MQ0F=0;ICB=0.3;HOB=0.125;AC=1;AN=4;DP4=25,31,4,3;MQ=60;ANN=C	synonymous_variant	LOW	Gene_Vitvi01g01009.t01	Gene_Vitvi01g01009.t01	transcript	Vitvi01g01009.t01	Coding	5\2	c.2496A>G	p.Leu832Leu	2496\2892	2496\2664	832\287		,C	upstream_gene_variant	MODIFIER	Gene_Vitvi01g01008.t01	Gene_Vitvi01g01008.t01	transcript	Vitvi01g01008.t01	Coding		c.-3897A>G					3812	WARNING_TRANSCRIPT_MULTIPLE_STOP_CODONS GT:PL:DP:AD 0\2:0,138,255:46:46,0 0\2:160,0,222:17:10,7
Noirv2.chr1 12380164 . A G 483.0 . DP=78;VDB=0.52342;SGB=-1.10274;MQSB=1;MQ0F=0;AC=4;AN=4;DP4=0,0,36,30;MQ=60;ANN=G	synonymous_variant	LOW	Gene_Vitvi01g01009.t01	Gene_Vitvi01g01009.t01	transcript	Vitvi01g01009.t01	Coding	5\2	c.2440T>C	p.Leu814Leu	2440\2892	2440\2664	814\287		,G	upstream_gene_variant	MODIFIER	Gene_Vitvi01g01008.t01	Gene_Vitvi01g01008.t01	transcript	Vitvi01g01008.t01	Coding		c.-3953T>C					3868	WARNING_TRANSCRIPT_MULTIPLE_STOP_CODONS GT:PL:DP:AD 1\2:255,141,0:47:0,47 1\2:255,57,0:19:0,19
Noirv2.chr1 12380279 . T A 221.0 . DP=72;VDB=0.094497;SGB=10.9211;RPB=0.997082;MQB=1;MQSB=1;BQB=0.297607;MQ0F=0;ICB=0.3;HOB=0.125;AC=1;AN=4;DP4=27,23,12,6;MQ=60;ANN=A	splice_region_variant&intron_variant	LOW	Gene_Vitvi01g01009.t01	Gene_Vitvi01g01009.t01	transcript	Vitvi01g01009.t01	Coding	4\2	c.2415+3A>T						,A	upstream_gene_variant	MODIFIER	Gene_Vitvi01g01008.t01	Gene_Vitvi01g01008.t01	transcript	Vitvi01g01008.t01	Coding		c.-4068A>T					3983	WARNING_TRANSCRIPT_MULTIPLE_STOP_CODONS GT:PL:DP:AD 0\2:0,117,255:39:39,0 0\2:255,0,217:29:11,18
Noirv2.chr1 12380683 . A G 217.0 . DP=72;VDB=0.372984;SGB=8.15014;RPB=0.999741;MQB=1;MQSB=1;BQB=0.965388;MQ0F=0;ICB=0.3;HOB=0.125;AC=1;AN=4;DP4=28,26,4,10;MQ=60;ANN=G	synonymous_variant	LOW	Gene_Vitvi01g01009.t01	Gene_Vitvi01g01009.t01	transcript	Vitvi01g01009.t01	Coding	3\2	c.2106T>C	p.Phe702Phe	2106\2892	2106\2664	702\287		,G	upstream_gene_variant	MODIFIER	Gene_Vitvi01g01008.t01	Gene_Vitvi01g01008.t01	transcript	Vitvi01g01008.t01	Coding		c.-4472T>C					4387	WARNING_TRANSCRIPT_MULTIPLE_STOP_CODONS GT:PL:DP:AD 0\2:0,108,255:36:36,0 0\2:251,0,255:32:18,14
Noirv2.chr1 12380740 . G A 221.0 . DP=74;VDB=0.433353;SGB=11.6141;RPB=0.934043;MQB=1;MQSB=1;BQB=0.978557;MQ0F=0;ICB=0.3;HOB=0.125;AC=1;AN=4;DP4=21,29,9,10;MQ=60;ANN=A	synonymous_variant	LOW	Gene_Vitvi01g01009.t01	Gene_Vitvi01g01009.t01	transcript	Vitvi01g01009.t01	Coding	3\2	c.2049C>T	p.Arg683Arg	2049\2892	2049\2664	683\287		,A	upstream_gene_variant	MODIFIER	Gene_Vitvi01g01008.t01	Gene_Vitvi01g01008.t01	transcript	Vitvi01g01008.t01	Coding		c.-4529C>T					4444	WARNING_TRANSCRIPT_MULTIPLE_STOP_CODONS GT:PL:DP:AD 0\2:0,111,255:37:37,0 0\2:255,0,239:32:13,19
Noirv2.chr1 12380797 . G C 483.0 . DP=65;VDB=0.897348;SGB=-1.38593;MQSB=1;MQ0F=0;AC=4;AN=4;DP4=0,0,27,36;MQ=60;ANN=C	synonymous_variant	LOW	Gene_Vitvi01g01009.t01	Gene_Vitvi01g01009.t01	transcript	Vitvi01g01009.t01	Coding	3\2	c.1992C>G	p.Leu664Leu	1992\2892	1992\2664	664\287		,C	upstream_gene_variant	MODIFIER	Gene_Vitvi01g01008.t01	Gene_Vitvi01g01008.t01	transcript	Vitvi01g01008.t01	Coding		c.-4586C>G					4501	WARNING_TRANSCRIPT_MULTIPLE_STOP_CODONS GT:PL:DP:AD 1\2:255,105,0:35:0,35 1\2:255,84,0:28:0,28
Noirv2.chr1 12380818 . C T 181.0 . DP=60;VDB=0.892439;SGB=8.84268;RPB=0.653374;MQB=1;MQSB=1;BQB=0.735784;MQ0F=0;ICB=0.3;HOB=0.125;AC=1;AN=4;DP4=24,20,2,13;MQ=60;ANN=T	synonymous_variant	LOW	Gene_Vitvi01g01009.t01	Gene_Vitvi01g01009.t01	transcript	Vitvi01g01009.t01	Coding	3\2	c.1971G>A	p.Leu657Leu	1971\2892	1971\2664	657\287		,T	upstream_gene_variant	MODIFIER	Gene_Vitvi01g01008.t01	Gene_Vitvi01g01008.t01	transcript	Vitvi01g01008.t01	Coding		c.-4607G>A					4522	WARNING_TRANSCRIPT_MULTIPLE_STOP_CODONS GT:PL:DP:AD 0\2:215,0,255:35:20,15 0\2:0,72,255:24:24,0
Noirv2.chr1 12380854 . C T 208.0 . DP=63;VDB=0.793759;SGB=7.4578;RPB=0.963426;MQB=1;MQSB=1;BQB=0.958657;MQ0F=0;ICB=0.3;HOB=0.125;AC=1;AN=4;DP4=24,24,7,6;MQ=60;ANN=T	synonymous_variant	LOW	Gene_Vitvi01g01009.t01	Gene_Vitvi01g01009.t01	transcript	Vitvi01g01009.t01	Coding	3\2	c.1935G>A	p.Leu645Leu	1935\2892	1935\2664	645\287		,T	upstream_gene_variant	MODIFIER	Gene_Vitvi01g01008.t01	Gene_Vitvi01g01008.t01	transcript	Vitvi01g01008.t01	Coding		c.-4643G>A					4558	WARNING_TRANSCRIPT_MULTIPLE_STOP_CODONS GT:PL:DP:AD 0\2:0,102,255:34:34,0 0\2:242,0,251:27:14,13
Noirv2.chr1 12381833 . T C 426.0 . DP=72;VDB=0.370407;SGB=-9.93983;RPB=0.816215;MQB=1;MQSB=1;BQB=0.965492;MQ0F=0;ICB=0.5;HOB=0.5;AC=2;AN=4;DP4=21,21,16,10;MQ=60;ANN=C	synonymous_variant	LOW	Gene_Vitvi01g01009.t01	Gene_Vitvi01g01009.t01	transcript	Vitvi01g01009.t01	Coding	2\2	c.1686A>G	p.Lys562Lys	1686\2892	1686\2664	562\287		GT:PL:DP:AD 0\2:255,0,255:41:25,16 0\2:204,0,255:27:17,10
Noirv2.chr1 12382078 . A G 483.0 . DP=78;VDB=0.33563;SGB=-1.38294;MQSB=1;MQ0F=0;AC=4;AN=4;DP4=0,0,37,34;MQ=60;ANN=G	synonymous_variant	LOW	Gene_Vitvi01g01009.t01	Gene_Vitvi01g01009.t01	transcript	Vitvi01g01009.t01	Coding	2\2	c.1441T>C	p.Leu481Leu	1441\2892	1441\2664	481\287		GT:PL:DP:AD 1\2:255,132,0:44:0,44 1\2:255,81,0:27:0,27
Noirv2.chr1 12382304 . C T 483.0 . DP=62;VDB=0.60081;SGB=-1.37988;MQSB=1;MQ0F=0;AC=4;AN=4;DP4=0,0,31,29;MQ=60;ANN=T	synonymous_variant	LOW	Gene_Vitvi01g01009.t01	Gene_Vitvi01g01009.t01	transcript	Vitvi01g01009.t01	Coding	2\2	c.1215G>A	p.Thr405Thr	1215\2892	1215\2664	405\287		GT:PL:DP:AD 1\2:255,111,0:37:0,37 1\2:255,69,0:23:0,23
Noirv2.chr1 12382355 . A G 457.0 . DP=75;VDB=0.742518;SGB=-0.785753;RPB=0.622742;MQB=1;MQSB=1;BQB=0.880435;MQ0F=0;ICB=0.3;HOB=0.125;AC=3;AN=4;DP4=5,8,33,27;MQ=60;ANN=G	synonymous_variant	LOW	Gene_Vitvi01g01009.t01	Gene_Vitvi01g01009.t01	transcript	Vitvi01g01009.t01	Coding	2\2	c.1164T>C	p.Asn388Asn	1164\2892	1164\2664	388\287		GT:PL:DP:AD 1\2:255,132,0:44:0,44 0\2:236,0,238:29:13,16
Noirv2.chr1 12382577 . A G 483.0 . DP=78;VDB=0.278934;SGB=-1.38627;MQSB=1;MQ0F=0;AC=4;AN=4;DP4=0,0,40,30;MQ=60;ANN=G	synonymous_variant	LOW	Gene_Vitvi01g01009.t01	Gene_Vitvi01g01009.t01	transcript	Vitvi01g01009.t01	Coding	2\2	c.942T>C	p.Phe314Phe	942\2892	942\2664	314\287		GT:PL:DP:AD 1\2:255,108,0:36:0,36 1\2:255,102,0:34:0,34
Noirv2.chr1 12382634 . G A 483.0 . DP=74;VDB=0.571768;SGB=-1.38624;MQSB=1;MQ0F=0;AC=4;AN=4;DP4=0,0,43,24;MQ=60;ANN=A	synonymous_variant	LOW	Gene_Vitvi01g01009.t01	Gene_Vitvi01g01009.t01	transcript	Vitvi01g01009.t01	Coding	2\2	c.885C>T	p.Leu295Leu	885\2892	885\2664	295\287		GT:PL:DP:AD 1\2:255,105,0:35:0,35 1\2:255,96,0:32:0,32
Noirv2.chr1 12382778 . A T 315.0 . DP=31;VDB=6.03042e-08;SGB=-8.71241;RPB=0.741266;MQB=0.780802;MQSB=0.997918;BQB=0.615715;MQ0F=0;ICB=0.3;HOB=0.125;AC=3;AN=4;DP4=3,5,8,14;MQ=50;ANN=T	synonymous_variant	LOW	Gene_Vitvi01g01009.t01	Gene_Vitvi01g01009.t01	transcript	Vitvi01g01009.t01	Coding	2\2	c.741T>A	p.Gly247Gly	741\2892	741\2664	247\287		GT:PL:DP:AD 1\2:255,51,0:17:0,17 0\2:94,0,175:13:8,5
Noirv2.chr1 12382847 . A T 263.0 . DP=30;VDB=1.24184e-05;SGB=-0.686689;RPB=0.876055;MQB=0.768176;MQSB=0.976609;BQB=0.480657;MQ0F=0;ICB=0.3;HOB=0.125;AC=3;AN=4;DP4=5,2,8,10;MQ=51;ANN=T	synonymous_variant	LOW	Gene_Vitvi01g01009.t01	Gene_Vitvi01g01009.t01	transcript	Vitvi01g01009.t01	Coding	2\2	c.672T>A	p.Gly224Gly	672\2892	672\2664	224\287		GT:PL:DP:AD 1\2:228,42,0:14:0,14 0\2:69,0,150:11:7,4
Noirv2.chr1 12383132 . A G 445.0 . DP=54;VDB=0.82473;SGB=-13.6221;RPB=0.928558;MQB=1;MQSB=1;BQB=0.334041;MQ0F=0;ICB=0.3;HOB=0.125;AC=3;AN=4;DP4=11,4,23,15;MQ=60;ANN=G	synonymous_variant	LOW	Gene_Vitvi01g01009.t01	Gene_Vitvi01g01009.t01	transcript	Vitvi01g01009.t01	Coding	2\2	c.387T>C	p.Thr129Thr	387\2892	387\2664	129\287		GT:PL:DP:AD 1\2:255,78,0:26:0,26 0\2:224,0,255:27:15,12
Noirv2.chr1 12383168 . C T 416.0 . DP=51;VDB=0.182941;SGB=-11.7809;RPB=0.851455;MQB=1;MQSB=1;BQB=0.960595;MQ0F=0;ICB=0.3;HOB=0.125;AC=3;AN=4;DP4=12,5,17,15;MQ=60;ANN=T	synonymous_variant	LOW	Gene_Vitvi01g01009.t01	Gene_Vitvi01g01009.t01	transcript	Vitvi01g01009.t01	Coding	2\2	c.351G>A	p.Arg117Arg	351\2892	351\2664	117\287		GT:PL:DP:AD 1\2:255,66,0:22:0,22 0\2:195,0,255:27:17,10
Noirv2.chr1 12383180 . C T 221.0 . DP=55;VDB=0.600175;SGB=10.2282;RPB=0.802562;MQB=1;MQSB=1;BQB=0.347838;MQ0F=0;ICB=0.3;HOB=0.125;AC=1;AN=4;DP4=18,17,13,4;MQ=60;ANN=T	synonymous_variant	LOW	Gene_Vitvi01g01009.t01	Gene_Vitvi01g01009.t01	transcript	Vitvi01g01009.t01	Coding	2\2	c.339G>A	p.Gly113Gly	339\2892	339\2664	113\287		GT:PL:DP:AD 0\2:0,69,255:23:23,0 0\2:255,0,216:29:12,17
Noirv2.chr1 12383329 . T G 411.0 . DP=72;VDB=0.386011;SGB=-16.0769;RPB=0.938667;MQB=1;MQSB=1;BQB=0.700272;MQ0F=0;ICB=0.3;HOB=0.125;AC=3;AN=4;DP4=10,10,19,27;MQ=60;ANN=G	synonymous_variant	LOW	Gene_Vitvi01g01009.t01	Gene_Vitvi01g01009.t01	transcript	Vitvi01g01009.t01	Coding	2\2	c.190A>C	p.Arg64Arg	190\2892	190\2664	64\287		GT:PL:DP:AD 1\2:255,108,0:36:0,36 0\2:190,0,255:30:20,10
Noirv2.chr1 12383482 . A G 437.0 . DP=64;VDB=0.237996;SGB=-14.8495;RPB=0.888885;MQB=1;MQSB=1;BQB=0.139918;MQ0F=0;ICB=0.3;HOB=0.125;AC=3;AN=4;DP4=4,13,21,21;MQ=60;ANN=G	synonymous_variant	LOW	Gene_Vitvi01g01009.t01	Gene_Vitvi01g01009.t01	transcript	Vitvi01g01009.t01	Coding	1\2	c.132T>C	p.Cys44Cys	132\2892	132\2664	44\287		GT:PL:DP:AD 1\2:255,90,0:30:0,30 0\2:216,0,250:29:17,12
Noirv2.chr1 12399613 . A G 483.0 . DP=66;VDB=0.870756;SGB=-1.38418;MQSB=0.967802;MQ0F=0;AC=4;AN=4;DP4=0,0,20,45;MQ=58;ANN=G	5_prime_UTR_premature_start_codon_gain_variant	LOW	Gene_Vitvi01g01010.t01	Gene_Vitvi01g01010.t01	transcript	Vitvi01g01010.t01	Coding	1\2	c.-152A>G						WARNING_TRANSCRIPT_MULTIPLE_STOP_CODONS,G	5_prime_UTR_variant	MODIFIER	Gene_Vitvi01g01010.t01	Gene_Vitvi01g01010.t01	transcript	Vitvi01g01010.t01	Coding	1\2	c.-152A>G					152	WARNING_TRANSCRIPT_MULTIPLE_STOP_CODONS GT:PL:DP:AD 1\2:255,117,0:39:0,39 1\2:255,78,0:26:0,26
Noirv2.chr1 12399968 . C T 466.0 . DP=60;VDB=0.64279;SGB=-10.8604;RPB=0.90333;MQB=1;MQSB=1;BQB=0.995942;MQ0F=0;ICB=0.5;HOB=0.5;AC=2;AN=4;DP4=14,13,17,12;MQ=60;ANN=T	synonymous_variant	LOW	Gene_Vitvi01g01010.t01	Gene_Vitvi01g01010.t01	transcript	Vitvi01g01010.t01	Coding	1\2	c.204C>T	p.Ser68Ser	417\2399	204\2168	68\221		WARNING_TRANSCRIPT_MULTIPLE_STOP_CODONS GT:PL:DP:AD 0\2:253,0,196:29:13,16 0\2:246,0,233:27:14,13
Noirv2.chr1 12400064 . T C 483.0 . DP=58;VDB=0.567813;SGB=-1.3848;MQSB=1;MQ0F=0;AC=4;AN=4;DP4=0,0,30,26;MQ=60;ANN=C	synonymous_variant	LOW	Gene_Vitvi01g01010.t01	Gene_Vitvi01g01010.t01	transcript	Vitvi01g01010.t01	Coding	1\2	c.300T>C	p.Thr100Thr	513\2399	300\2168	100\221		WARNING_TRANSCRIPT_MULTIPLE_STOP_CODONS GT:PL:DP:AD 1\2:255,96,0:32:0,32 1\2:255,72,0:24:0,24
Noirv2.chr1 12400372 . C T 210.0 . DP=145;VDB=7.05446e-21;SGB=-14.2358;RPB=2.90533e-06;MQB=1;MQSB=1;BQB=0.258521;MQ0F=0;ICB=0.5;HOB=0.5;AC=2;AN=4;DP4=75,23,40,0;MQ=60;ANN=T	splice_region_variant&intron_variant	LOW	Gene_Vitvi01g01010.t01	Gene_Vitvi01g01010.t01	transcript	Vitvi01g01010.t01	Coding	1\2	c.601+7C>T						WARNING_TRANSCRIPT_MULTIPLE_STOP_CODONS GT:PL:DP:AD 0\2:157,0,255:78:50,28 0\2:88,0,255:60:48,12
Noirv2.chr1 12402608 . T C 483.0 . DP=73;VDB=0.935753;SGB=-1.38552;MQSB=1;MQ0F=0;AC=4;AN=4;DP4=0,0,36,31;MQ=60;ANN=C	synonymous_variant	LOW	Gene_Vitvi01g01010.t01	Gene_Vitvi01g01010.t01	transcript	Vitvi01g01010.t01	Coding	2\2	c.955T>C	p.Leu319Leu	1168\2399	955\2168	319\221		WARNING_TRANSCRIPT_MULTIPLE_STOP_CODONS GT:PL:DP:AD 1\2:255,84,0:28:0,28 1\2:255,117,0:39:0,39
Noirv2.chr1 12403363 . A T 483.0 . DP=59;VDB=0.892502;SGB=-1.38598;MQSB=1;MQ0F=0;AC=4;AN=4;DP4=0,0,25,29;MQ=60;ANN=T	splice_region_variant&intron_variant	LOW	Gene_Vitvi01g01010.t01	Gene_Vitvi01g01010.t01	transcript	Vitvi01g01010.t01	Coding	3\2	c.1568+5A>T						WARNING_TRANSCRIPT_MULTIPLE_STOP_CODONS GT:PL:DP:AD 1\2:255,84,0:28:0,28 1\2:255,78,0:26:0,26
Noirv2.chr1 12403364 . T G 420.0 . DP=58;VDB=0.822373;SGB=-9.93983;RPB=0.614898;MQB=1;MQSB=1;BQB=0.44964;MQ0F=0;ICB=0.5;HOB=0.5;AC=2;AN=4;DP4=16,13,9,17;MQ=60;ANN=G	splice_region_variant&intron_variant	LOW	Gene_Vitvi01g01010.t01	Gene_Vitvi01g01010.t01	transcript	Vitvi01g01010.t01	Coding	3\2	c.1568+6T>G						WARNING_TRANSCRIPT_MULTIPLE_STOP_CODONS GT:PL:DP:AD 0\2:213,0,255:28:17,11 0\2:240,0,244:27:12,15
Noirv2.chr1 12404273 . C G 476.0 . DP=56;VDB=0.0180471;SGB=-11.1672;RPB=0.967406;MQB=1;MQSB=1;BQB=0.254843;MQ0F=0;ICB=0.5;HOB=0.5;AC=2;AN=4;DP4=11,9,15,15;MQ=60;ANN=G	synonymous_variant	LOW	Gene_Vitvi01g01010.t01	Gene_Vitvi01g01010.t01	transcript	Vitvi01g01010.t01	Coding	4\2	c.1749C>G	p.Val583Val	1962\2399	1749\2168	583\221		WARNING_TRANSCRIPT_MULTIPLE_STOP_CODONS GT:PL:DP:AD 0\2:255,0,222:27:12,15 0\2:255,0,144:23:8,15
Noirv2.chr1 12424254 . G A 221.0 . DP=59;VDB=0.724036;SGB=10.2282;RPB=0.731054;MQB=1;MQSB=1;BQB=0.999827;MQ0F=0;ICB=0.3;HOB=0.125;AC=1;AN=4;DP4=21,16,10,7;MQ=60;ANN=A	synonymous_variant	LOW	Gene_Vitvi01g01011.t01	Gene_Vitvi01g01011.t01	transcript	Vitvi01g01011.t01	Coding	1\2	c.15C>T	p.Phe5Phe	15\271	15\271	5\26		GT:PL:DP:AD 0\2:255,0,196:27:10,17 0\2:0,81,255:27:27,0
Noirv2.chr1 12431166 . T C 483.0 . DP=68;VDB=0.913615;SGB=-1.38608;MQSB=1;MQ0F=0;AC=4;AN=4;DP4=0,0,39,21;MQ=60;ANN=C	synonymous_variant	LOW	Gene_Vitvi01g01012.t01	Gene_Vitvi01g01012.t01	transcript	Vitvi01g01012.t01	Coding	1\2	c.81T>C	p.Ser27Ser	82\271	81\258	27\25		,C	downstream_gene_variant	MODIFIER	Gene_Vitvi01g01013.t01	Gene_Vitvi01g01013.t01	transcript	Vitvi01g01013.t01	Coding		c.*4224A>G					4004	GT:PL:DP:AD 1\2:255,84,0:28:0,28 1\2:255,96,0:32:0,32
Noirv2.chr1 12431187 . A G 216.0 . DP=69;VDB=0.227482;SGB=8.15014;RPB=0.477935;MQB=1;MQSB=1;BQB=0.641456;MQ0F=0;ICB=0.3;HOB=0.125;AC=1;AN=4;DP4=32,17,7,7;MQ=60;ANN=G	synonymous_variant	LOW	Gene_Vitvi01g01012.t01	Gene_Vitvi01g01012.t01	transcript	Vitvi01g01012.t01	Coding	1\2	c.102A>G	p.Gln34Gln	103\271	102\258	34\25		,G	downstream_gene_variant	MODIFIER	Gene_Vitvi01g01013.t01	Gene_Vitvi01g01013.t01	transcript	Vitvi01g01013.t01	Coding		c.*4203T>C					3983	GT:PL:DP:AD 0\2:250,0,229:28:14,14 0\2:0,105,255:35:35,0
Noirv2.chr1 12431310 . C T 434.0 . DP=67;VDB=0.652272;SGB=-16.3837;RPB=0.868035;MQB=1;MQSB=1;BQB=0.969037;MQ0F=0;ICB=0.3;HOB=0.125;AC=3;AN=4;DP4=7,10,20,27;MQ=60;ANN=T	synonymous_variant	LOW	Gene_Vitvi01g01012.t01	Gene_Vitvi01g01012.t01	transcript	Vitvi01g01012.t01	Coding	1\2	c.225C>T	p.Phe75Phe	226\271	225\258	75\25		,T	downstream_gene_variant	MODIFIER	Gene_Vitvi01g01013.t01	Gene_Vitvi01g01013.t01	transcript	Vitvi01g01013.t01	Coding		c.*4080G>A					3860	GT:PL:DP:AD 1\2:255,102,0:34:0,34 0\2:213,0,255:30:17,13
Noirv2.chr1 12431343 . G A 203.0 . DP=69;VDB=0.260041;SGB=8.15014;RPB=0.473123;MQB=1;MQSB=1;BQB=0.949618;MQ0F=0;ICB=0.3;HOB=0.125;AC=1;AN=4;DP4=27,25,3,11;MQ=60;ANN=A	stop_retained_variant	LOW	Gene_Vitvi01g01012.t01	Gene_Vitvi01g01012.t01	transcript	Vitvi01g01012.t01	Coding	1\2	c.258G>A	p.Ter86Ter	259\271	258\258	86\25		,A	downstream_gene_variant	MODIFIER	Gene_Vitvi01g01013.t01	Gene_Vitvi01g01013.t01	transcript	Vitvi01g01013.t01	Coding		c.*4047C>T					3827	GT:PL:DP:AD 0\2:0,117,255:39:39,0 0\2:237,0,252:27:13,14
Noirv2.chr1 12435756 . A G 96.0 . DP=53;VDB=0.486211;SGB=2.63044;RPB=0.143653;MQB=1;MQSB=1;BQB=0.988776;MQ0F=0;ICB=0.3;HOB=0.125;AC=1;AN=4;DP4=19,20,3,3;MQ=60;ANN=G	synonymous_variant	LOW	Gene_Vitvi01g01013.t01	Gene_Vitvi01g01013.t01	transcript	Vitvi01g01013.t01	Coding	1\2	c.615T>C	p.Phe205Phe	744\2330	615\281	205\226		,G	downstream_gene_variant	MODIFIER	Gene_Vitvi01g01012.t01	Gene_Vitvi01g01012.t01	transcript	Vitvi01g01012.t01	Coding		c.*4413A>G					4101	GT:PL:DP:AD 0\2:0,87,255:29:29,0 0\2:130,0,208:16:10,6
Noirv2.chr1 12435819 . G A 425.0 . DP=43;VDB=0.544777;SGB=-0.623078;MQSB=1;MQ0F=0;AC=4;AN=4;DP4=0,0,20,13;MQ=60;ANN=A	synonymous_variant	LOW	Gene_Vitvi01g01013.t01	Gene_Vitvi01g01013.t01	transcript	Vitvi01g01013.t01	Coding	1\2	c.552C>T	p.Asp184Asp	681\2330	552\281	184\226		,A	downstream_gene_variant	MODIFIER	Gene_Vitvi01g01012.t01	Gene_Vitvi01g01012.t01	transcript	Vitvi01g01012.t01	Coding		c.*4476G>A					4164	GT:PL:DP:AD 1\2:255,75,0:25:0,25 1\2:197,24,0:8:0,8
Noirv2.chr1 12435864 . G T 483.0 . DP=48;VDB=0.533704;SGB=-1.28937;MQSB=1;MQ0F=0;AC=4;AN=4;DP4=0,0,20,22;MQ=60;ANN=T	synonymous_variant	LOW	Gene_Vitvi01g01013.t01	Gene_Vitvi01g01013.t01	transcript	Vitvi01g01013.t01	Coding	1\2	c.507C>A	p.Pro169Pro	636\2330	507\281	169\226		,T	downstream_gene_variant	MODIFIER	Gene_Vitvi01g01012.t01	Gene_Vitvi01g01012.t01	transcript	Vitvi01g01012.t01	Coding		c.*4521G>T					4209	GT:PL:DP:AD 1\2:255,84,0:28:0,28 1\2:255,42,0:14:0,14
Noirv2.chr1 12435906 . T C 483.0 . DP=45;VDB=0.361051;SGB=-1.3847;MQSB=1;MQ0F=0;AC=4;AN=4;DP4=0,0,23,19;MQ=60;ANN=C	synonymous_variant	LOW	Gene_Vitvi01g01013.t01	Gene_Vitvi01g01013.t01	transcript	Vitvi01g01013.t01	Coding	1\2	c.465A>G	p.Pro155Pro	594\2330	465\281	155\226		,C	downstream_gene_variant	MODIFIER	Gene_Vitvi01g01012.t01	Gene_Vitvi01g01012.t01	transcript	Vitvi01g01012.t01	Coding		c.*4563T>C					4251	GT:PL:DP:AD 1\2:255,63,0:21:0,21 1\2:255,63,0:21:0,21
Noirv2.chr1 12436176 . T C 483.0 . DP=30;VDB=0.00865748;SGB=-1.36354;MQSB=1;MQ0F=0;AC=4;AN=4;DP4=0,0,14,11;MQ=60;ANN=C	synonymous_variant	LOW	Gene_Vitvi01g01013.t01	Gene_Vitvi01g01013.t01	transcript	Vitvi01g01013.t01	Coding	1\2	c.195A>G	p.Pro65Pro	324\2330	195\281	65\226		,C	upstream_gene_variant	MODIFIER	Gene_Vitvi01g01014.r01	Gene_Vitvi01g01014.r01	transcript	Vitvi01g01014.r01	Noncoding		n.-4875T>C					4875	,C	downstream_gene_variant	MODIFIER	Gene_Vitvi01g01012.t01	Gene_Vitvi01g01012.t01	transcript	Vitvi01g01012.t01	Coding		c.*4833T>C					4521	GT:PL:DP:AD 1\2:255,36,0:13:0,12 1\2:255,36,0:12:0,12
Noirv2.chr1 12436269 . G A 395.0 . DP=55;VDB=0.69554;SGB=-0.903916;RPB=0.689189;MQB=1;MQSB=1;BQB=0.324324;MQ0F=0;ICB=0.3;HOB=0.125;AC=3;AN=4;DP4=1,1,22,15;MQ=60;ANN=A	synonymous_variant	LOW	Gene_Vitvi01g01013.t01	Gene_Vitvi01g01013.t01	transcript	Vitvi01g01013.t01	Coding	1\2	c.102C>T	p.Thr34Thr	231\2330	102\281	34\226		,A	upstream_gene_variant	MODIFIER	Gene_Vitvi01g01014.r01	Gene_Vitvi01g01014.r01	transcript	Vitvi01g01014.r01	Noncoding		n.-4782G>A					4782	,A	downstream_gene_variant	MODIFIER	Gene_Vitvi01g01012.t01	Gene_Vitvi01g01012.t01	transcript	Vitvi01g01012.t01	Coding		c.*4926G>A					4614	GT:PL:DP:AD 1\2:255,81,0:27:0,27 0\2:174,0,13:12:2,10
Noirv2.chr1 12441235 . G A 450.0 . DP=71;VDB=0.120065;SGB=-15.4632;RPB=0.578169;MQB=1;MQSB=1;BQB=0.982833;MQ0F=0;ICB=0.3;HOB=0.125;AC=3;AN=4;DP4=9,9,19,25;MQ=60;ANN=A	splice_region_variant&intron_variant	LOW	Gene_Vitvi01g01014.r01	Gene_Vitvi01g01014.r01	transcript	Vitvi01g01014.r01	Noncoding	1\2	n.182+3G>A						,A	upstream_gene_variant	MODIFIER	Gene_Vitvi01g01013.t01	Gene_Vitvi01g01013.t01	transcript	Vitvi01g01013.t01	Coding		c.-4865C>T					4736	GT:PL:DP:AD 1\2:255,99,0:33:0,33 0\2:229,0,255:29:18,11
Noirv2.chr1 12460505 . T C 469.0 . DP=71;VDB=0.122303;SGB=-11.1672;RPB=0.972527;MQB=0.983652;MQSB=0.967216;BQB=0.878771;MQ0F=0;ICB=0.5;HOB=0.5;AC=2;AN=4;DP4=23,16,19,11;MQ=59;ANN=C	synonymous_variant	LOW	Gene_Vitvi01g01015.t01	Gene_Vitvi01g01015.t01	transcript	Vitvi01g01015.t01	Coding	5\2	c.615A>G	p.Thr205Thr	615\240	615\240	205\279		GT:PL:DP:AD 0\2:255,0,255:40:23,17 0\2:247,0,255:29:16,13
Noirv2.chr1 12461554 . A G 215.0 . DP=62;VDB=0.255981;SGB=7.4578;RPB=0.636258;MQB=1;MQSB=1;BQB=0.401024;MQ0F=0;ICB=0.3;HOB=0.125;AC=1;AN=4;DP4=26,19,6,7;MQ=60;ANN=G	splice_region_variant&intron_variant	LOW	Gene_Vitvi01g01015.t01	Gene_Vitvi01g01015.t01	transcript	Vitvi01g01015.t01	Coding	3\2	c.386+4T>C						GT:PL:DP:AD 0\2:0,111,255:37:37,0 0\2:249,0,171:21:8,13
Noirv2.chr1 12461614 . C T 221.0 . DP=65;VDB=0.715932;SGB=10.2282;RPB=0.344445;MQB=0.939696;MQSB=0.972288;BQB=0.98793;MQ0F=0;ICB=0.3;HOB=0.125;AC=1;AN=4;DP4=26,17,6,11;MQ=59;ANN=T	synonymous_variant	LOW	Gene_Vitvi01g01015.t01	Gene_Vitvi01g01015.t01	transcript	Vitvi01g01015.t01	Coding	3\2	c.330G>A	p.Pro110Pro	330\240	330\240	110\279		GT:PL:DP:AD 0\2:0,102,255:34:34,0 0\2:255,0,169:26:9,17
Noirv2.chr1 12463238 . A T 209.0 . DP=62;VDB=0.239031;SGB=6.76576;RPB=0.2494;MQB=1;MQSB=1;BQB=0.996416;MQ0F=0;ICB=0.3;HOB=0.125;AC=1;AN=4;DP4=27,20,7,5;MQ=60;ANN=T	synonymous_variant	LOW	Gene_Vitvi01g01015.t01	Gene_Vitvi01g01015.t01	transcript	Vitvi01g01015.t01	Coding	1\2	c.87T>A	p.Ala29Ala	87\240	87\240	29\279		GT:PL:DP:AD 0\2:0,120,255:40:40,0 0\2:243,0,156:19:7,12
Noirv2.chr1 12473381 . G A 221.0 . DP=62;VDB=0.0173694;SGB=8.84268;RPB=0.716324;MQB=1;MQSB=1;BQB=0.99434;MQ0F=0;ICB=0.3;HOB=0.125;AC=1;AN=4;DP4=20,23,9,6;MQ=60;ANN=A	synonymous_variant	LOW	Gene_Vitvi01g01016.t01	Gene_Vitvi01g01016.t01	transcript	Vitvi01g01016.t01	Coding	1\2	c.36C>T	p.Phe12Phe	36\272	36\272	12\223		,A	upstream_gene_variant	MODIFIER	Gene_Vitvi01g01017.t01	Gene_Vitvi01g01017.t01	transcript	Vitvi01g01017.t01	Coding		c.-1231G>A					1231	GT:PL:DP:AD 0\2:0,87,255:29:29,0 0\2:255,0,255:29:14,15
Noirv2.chr1 12474959 . T C 483.0 . DP=79;VDB=0.986177;SGB=-1.38623;MQSB=1;MQ0F=0;AC=4;AN=4;DP4=0,0,31,37;MQ=60;ANN=C	synonymous_variant	LOW	Gene_Vitvi01g01017.t01	Gene_Vitvi01g01017.t01	transcript	Vitvi01g01017.t01	Coding	2\2	c.258T>C	p.Asp86Asp	258\297	258\297	86\28		,C	upstream_gene_variant	MODIFIER	Gene_Vitvi01g01016.t01	Gene_Vitvi01g01016.t01	transcript	Vitvi01g01016.t01	Coding		c.-1543A>G					1543	GT:PL:DP:AD 1\2:255,108,0:36:0,36 1\2:255,96,0:32:0,32
Noirv2.chr1 12484235 . C T 483.0 . DP=71;VDB=0.508224;SGB=-1.38515;MQSB=1;MQ0F=0;AC=4;AN=4;DP4=0,0,26,43;MQ=60;ANN=T	synonymous_variant	LOW	Gene_Vitvi01g01018.t01	Gene_Vitvi01g01018.t01	transcript	Vitvi01g01018.t01	Coding	8\2	c.1332G>A	p.Leu444Leu	1332\2572	1332\2572	444\223		GT:PL:DP:AD 1\2:255,123,0:41:0,41 1\2:255,84,0:28:0,28
Noirv2.chr1 12484279 . T A 483.0 . DP=60;VDB=0.372644;SGB=-1.33026;MQSB=1;MQ0F=0;AC=4;AN=4;DP4=0,0,22,35;MQ=60;ANN=A	splice_region_variant&intron_variant	LOW	Gene_Vitvi01g01018.t01	Gene_Vitvi01g01018.t01	transcript	Vitvi01g01018.t01	Coding	7\2	c.1296-8A>T						GT:PL:DP:AD 1\2:255,114,0:38:0,38 1\2:255,57,0:19:0,19
Noirv2.chr1 12488214 . A T 221.0 . DP=67;VDB=0.762846;SGB=8.15014;RPB=0.778801;MQB=1;MQSB=1;BQB=0.883968;MQ0F=0;ICB=0.3;HOB=0.125;AC=1;AN=4;DP4=28,20,8,6;MQ=59;ANN=T	synonymous_variant	LOW	Gene_Vitvi01g01018.t01	Gene_Vitvi01g01018.t01	transcript	Vitvi01g01018.t01	Coding	7\2	c.1278T>A	p.Ile426Ile	1278\2572	1278\2572	426\223		GT:PL:DP:AD 0\2:0,102,255:34:34,0 0\2:255,0,255:28:14,14
Noirv2.chr1 12488244 . A T 476.0 . DP=66;VDB=0.571234;SGB=-1.05457;RPB=0.999835;MQB=1;MQSB=1;BQB=0.493566;MQ0F=0;ICB=0.3;HOB=0.125;AC=3;AN=4;DP4=6,6,26,23;MQ=60;ANN=T	synonymous_variant	LOW	Gene_Vitvi01g01018.t01	Gene_Vitvi01g01018.t01	transcript	Vitvi01g01018.t01	Coding	7\2	c.1248T>A	p.Ile416Ile	1248\2572	1248\2572	416\223		GT:PL:DP:AD 1\2:255,105,0:35:0,35 0\2:255,0,251:26:12,14
Noirv2.chr1 12488543 . GAAAAA GAAAAAA 277.0 . INDEL;IDV=36;IMF=0.878049;DP=67;VDB=0.988761;SGB=-1.36897;MQSB=1;MQ0F=0;AC=4;AN=4;DP4=5,4,32,26;MQ=60;ANN=GAAAAAA	splice_region_variant&intron_variant	LOW	Gene_Vitvi01g01018.t01	Gene_Vitvi01g01018.t01	transcript	Vitvi01g01018.t01	Coding	6\2	c.1098+7_1098+8insT						GT:PL:DP:AD 1\2:172,54,0:41:4,37 1\2:134,0,5:26:5,21
Noirv2.chr1 12488586 . C T 221.0 . DP=59;VDB=0.21166;SGB=11.6141;RPB=0.718839;MQB=1;MQSB=1;BQB=0.566273;MQ0F=0;ICB=0.3;HOB=0.125;AC=1;AN=4;DP4=20,18,10,9;MQ=60;ANN=T	synonymous_variant	LOW	Gene_Vitvi01g01018.t01	Gene_Vitvi01g01018.t01	transcript	Vitvi01g01018.t01	Coding	6\2	c.1068G>A	p.Leu356Leu	1068\2572	1068\2572	356\223		GT:PL:DP:AD 0\2:255,0,255:36:17,19 0\2:0,63,255:21:21,0
Noirv2.chr1 12488810 . A G 198.0 . DP=62;VDB=0.866283;SGB=8.15014;RPB=0.874508;MQB=1;MQSB=1;BQB=0.99798;MQ0F=0;ICB=0.3;HOB=0.125;AC=1;AN=4;DP4=19,25,11,3;MQ=60;ANN=G	synonymous_variant	LOW	Gene_Vitvi01g01018.t01	Gene_Vitvi01g01018.t01	transcript	Vitvi01g01018.t01	Coding	5\2	c.951T>C	p.Gly317Gly	951\2572	951\2572	317\223		GT:PL:DP:AD 0\2:0,108,255:36:36,0 0\2:232,0,168:22:8,14
Noirv2.chr1 12488894 . T C 483.0 . DP=72;VDB=0.642887;SGB=-1.36174;MQSB=1;MQ0F=0;AC=4;AN=4;DP4=0,0,39,28;MQ=60;ANN=C	synonymous_variant	LOW	Gene_Vitvi01g01018.t01	Gene_Vitvi01g01018.t01	transcript	Vitvi01g01018.t01	Coding	5\2	c.867A>G	p.Lys289Lys	867\2572	867\2572	289\223		GT:PL:DP:AD 1\2:255,132,0:44:0,44 1\2:255,69,0:23:0,23
Noirv2.chr1 12495601 . T C 220.0 . DP=74;VDB=0.0751824;SGB=9.53539;RPB=0.699184;MQB=1;MQSB=1;BQB=0.281415;MQ0F=0;ICB=0.3;HOB=0.125;AC=1;AN=4;DP4=24,29,7,9;MQ=60;ANN=C	splice_region_variant&intron_variant	LOW	Gene_Vitvi01g01018.t01	Gene_Vitvi01g01018.t01	transcript	Vitvi01g01018.t01	Coding	4\2	c.847+3A>G						GT:PL:DP:AD 0\2:254,0,255:36:20,16 0\2:0,99,255:33:33,0
Noirv2.chr1 12495650 . G A 483.0 . DP=73;VDB=0.745699;SGB=-1.38619;MQSB=1;MQ0F=0;AC=4;AN=4;DP4=0,0,34,33;MQ=60;ANN=A	synonymous_variant	LOW	Gene_Vitvi01g01018.t01	Gene_Vitvi01g01018.t01	transcript	Vitvi01g01018.t01	Coding	4\2	c.801C>T	p.Val267Val	801\2572	801\2572	267\223		GT:PL:DP:AD 1\2:255,93,0:31:0,31 1\2:255,108,0:36:0,36
Noirv2.chr1 12495802 . G T 483.0 . DP=62;VDB=0.574273;SGB=-1.37852;MQSB=1;MQ0F=0;AC=4;AN=4;DP4=0,0,31,30;MQ=60;ANN=T	splice_region_variant&intron_variant	LOW	Gene_Vitvi01g01018.t01	Gene_Vitvi01g01018.t01	transcript	Vitvi01g01018.t01	Coding	3\2	c.795+8C>A						GT:PL:DP:AD 1\2:255,114,0:38:0,38 1\2:255,69,0:23:0,23
Noirv2.chr1 12498580 . T C 351.0 . DP=50;VDB=0.96693;SGB=-12.7015;RPB=0.77853;MQB=1;MQSB=1;BQB=0.984976;MQ0F=0;ICB=0.3;HOB=0.125;AC=3;AN=4;DP4=3,10,10,25;MQ=60;ANN=C	splice_region_variant&intron_variant	LOW	Gene_Vitvi01g01018.t01	Gene_Vitvi01g01018.t01	transcript	Vitvi01g01018.t01	Coding	1\2	c.575-4A>G						GT:PL:DP:AD 1\2:255,87,0:29:0,29 0\2:130,0,240:19:13,6
Noirv2.chr1 12498844 . A C 483.0 . DP=42;VDB=0.628551;SGB=-1.34518;MQSB=1;MQ0F=0;AC=4;AN=4;DP4=0,0,20,21;MQ=60;ANN=C	synonymous_variant	LOW	Gene_Vitvi01g01018.t01	Gene_Vitvi01g01018.t01	transcript	Vitvi01g01018.t01	Coding	1\2	c.402T>G	p.Gly134Gly	402\2572	402\2572	134\223		GT:PL:DP:AD 1\2:255,78,0:26:0,26 1\2:255,45,0:15:0,15
Noirv2.chr1 12498883 . A G 483.0 . DP=37;VDB=0.220079;SGB=-1.37269;MQSB=1;MQ0F=0;AC=4;AN=4;DP4=0,0,17,14;MQ=60;ANN=G	synonymous_variant	LOW	Gene_Vitvi01g01018.t01	Gene_Vitvi01g01018.t01	transcript	Vitvi01g01018.t01	Coding	1\2	c.363T>C	p.Asn121Asn	363\2572	363\2572	121\223		GT:PL:DP:AD 1\2:255,51,0:17:0,17 1\2:255,42,0:14:0,14
Noirv2.chr1 12498985 . G A 120.0 . DP=41;VDB=0.293704;SGB=3.31571;RPB=0.84246;MQB=1;MQSB=1;BQB=0.993991;MQ0F=0;ICB=0.3;HOB=0.125;AC=1;AN=4;DP4=19,13,5,2;MQ=60;ANN=A	synonymous_variant	LOW	Gene_Vitvi01g01018.t01	Gene_Vitvi01g01018.t01	transcript	Vitvi01g01018.t01	Coding	1\2	c.261C>T	p.Phe87Phe	261\2572	261\2572	87\223		GT:PL:DP:AD 0\2:0,69,255:23:23,0 0\2:154,0,200:16:9,7
Noirv2.chr1 12499015 . A G 483.0 . DP=47;VDB=0.456457;SGB=-1.3736;MQSB=1;MQ0F=0;AC=4;AN=4;DP4=0,0,26,16;MQ=60;ANN=G	synonymous_variant	LOW	Gene_Vitvi01g01018.t01	Gene_Vitvi01g01018.t01	transcript	Vitvi01g01018.t01	Coding	1\2	c.231T>C	p.Ser77Ser	231\2572	231\2572	77\223		GT:PL:DP:AD 1\2:255,75,0:25:0,25 1\2:255,51,0:17:0,17
Noirv2.chr1 12499021 . A G 483.0 . DP=44;VDB=0.204145;SGB=-1.3809;MQSB=1;MQ0F=0;AC=4;AN=4;DP4=0,0,26,15;MQ=60;ANN=G	synonymous_variant	LOW	Gene_Vitvi01g01018.t01	Gene_Vitvi01g01018.t01	transcript	Vitvi01g01018.t01	Coding	1\2	c.225T>C	p.Gly75Gly	225\2572	225\2572	75\223		GT:PL:DP:AD 1\2:255,69,0:23:0,23 1\2:255,54,0:18:0,18
Noirv2.chr1 12499092 . A G 393.0 . DP=54;VDB=0.669422;SGB=0.304962;RPB=0.143038;MQB=1;MQSB=1;BQB=0.981315;MQ0F=0;ICB=0.3;HOB=0.125;AC=3;AN=4;DP4=5,2,25,15;MQ=60;ANN=G	synonymous_variant	LOW	Gene_Vitvi01g01018.t01	Gene_Vitvi01g01018.t01	transcript	Vitvi01g01018.t01	Coding	1\2	c.154T>C	p.Leu52Leu	154\2572	154\2572	52\223		GT:PL:DP:AD 1\2:255,96,0:32:0,32 0\2:172,0,153:15:7,8
Noirv2.chr1 12518658 . A G 221.0 . DP=73;VDB=0.657058;SGB=10.9211;RPB=0.924653;MQB=1;MQSB=1;BQB=0.967627;MQ0F=0;ICB=0.3;HOB=0.125;AC=1;AN=4;DP4=18,29,10,8;MQ=60;ANN=G	synonymous_variant	LOW	Gene_Vitvi01g01019.t01	Gene_Vitvi01g01019.t01	transcript	Vitvi01g01019.t01	Coding	1\2	c.27A>G	p.Gln9Gln	44\2390	27\2211	9\202		WARNING_TRANSCRIPT_MULTIPLE_STOP_CODONS,G	upstream_gene_variant	MODIFIER	Gene_Vitvi01g01020.t01	Gene_Vitvi01g01020.t01	transcript	Vitvi01g01020.t01	Coding		c.-3013A>G					3013	GT:PL:DP:AD 0\2:255,0,255:36:18,18 0\2:0,87,255:29:29,0
Noirv2.chr1 12519706 . A G 483.0 . DP=69;VDB=0.285776;SGB=-1.38611;MQSB=1;MQ0F=0;AC=4;AN=4;DP4=0,0,33,30;MQ=60;ANN=G	synonymous_variant	LOW	Gene_Vitvi01g01019.t01	Gene_Vitvi01g01019.t01	transcript	Vitvi01g01019.t01	Coding	2\2	c.369A>G	p.Gln123Gln	386\2390	369\2211	123\202		WARNING_TRANSCRIPT_MULTIPLE_STOP_CODONS,G	upstream_gene_variant	MODIFIER	Gene_Vitvi01g01020.t01	Gene_Vitvi01g01020.t01	transcript	Vitvi01g01020.t01	Coding		c.-1965A>G					1965	GT:PL:DP:AD 1\2:255,102,0:34:0,34 1\2:255,87,0:29:0,29
Noirv2.chr1 12519830 . C T 276.0 . DP=52;VDB=0.842833;SGB=-7.17815;RPB=0.968105;MQB=1;MQSB=1;BQB=0.813729;MQ0F=0;ICB=0.5;HOB=0.5;AC=2;AN=4;DP4=12,18,7,10;MQ=60;ANN=T	synonymous_variant	LOW	Gene_Vitvi01g01019.t01	Gene_Vitvi01g01019.t01	transcript	Vitvi01g01019.t01	Coding	2\2	c.493C>T	p.Leu165Leu	510\2390	493\2211	165\202		WARNING_TRANSCRIPT_MULTIPLE_STOP_CODONS,T	upstream_gene_variant	MODIFIER	Gene_Vitvi01g01020.t01	Gene_Vitvi01g01020.t01	transcript	Vitvi01g01020.t01	Coding		c.-1841C>T					1841	GT:PL:DP:AD 0\2:164,0,255:28:18,10 0\2:146,0,247:19:12,7
Noirv2.chr1 12519854 . T C 421.0 . DP=45;VDB=0.0665622;SGB=-9.32613;RPB=0.998335;MQB=1;MQSB=1;BQB=0.93697;MQ0F=0;ICB=0.5;HOB=0.5;AC=2;AN=4;DP4=7,8,9,15;MQ=60;ANN=C	synonymous_variant	LOW	Gene_Vitvi01g01019.t01	Gene_Vitvi01g01019.t01	transcript	Vitvi01g01019.t01	Coding	2\2	c.517T>C	p.Leu173Leu	534\2390	517\2211	173\202		WARNING_TRANSCRIPT_MULTIPLE_STOP_CODONS,C	upstream_gene_variant	MODIFIER	Gene_Vitvi01g01020.t01	Gene_Vitvi01g01020.t01	transcript	Vitvi01g01020.t01	Coding		c.-1817T>C					1817	GT:PL:DP:AD 0\2:255,0,198:25:10,15 0\2:200,0,123:14:5,9
Noirv2.chr1 12519937 . C T 221.0 . DP=51;VDB=0.0547647;SGB=13.0002;RPB=0.869574;MQB=1;MQSB=1;BQB=0.841531;MQ0F=0;ICB=0.3;HOB=0.125;AC=1;AN=4;DP4=10,13,5,16;MQ=60;ANN=T	synonymous_variant	LOW	Gene_Vitvi01g01019.t01	Gene_Vitvi01g01019.t01	transcript	Vitvi01g01019.t01	Coding	2\2	c.600C>T	p.Gly200Gly	617\2390	600\2211	200\202		WARNING_TRANSCRIPT_MULTIPLE_STOP_CODONS,T	upstream_gene_variant	MODIFIER	Gene_Vitvi01g01020.t01	Gene_Vitvi01g01020.t01	transcript	Vitvi01g01020.t01	Coding		c.-1734C>T					1734	GT:PL:DP:AD 0\2:255,0,179:30:9,21 0\2:0,42,255:14:14,0
Noirv2.chr1 12520390 . A G 221.0 . DP=62;VDB=0.364469;SGB=9.53539;RPB=0.384253;MQB=1;MQSB=1;BQB=0.984981;MQ0F=0;ICB=0.3;HOB=0.125;AC=1;AN=4;DP4=20,22,7,9;MQ=60;ANN=G	synonymous_variant	LOW	Gene_Vitvi01g01019.t01	Gene_Vitvi01g01019.t01	transcript	Vitvi01g01019.t01	Coding	3\2	c.939A>G	p.Pro313Pro	956\2390	939\2211	313\202		WARNING_TRANSCRIPT_MULTIPLE_STOP_CODONS,G	upstream_gene_variant	MODIFIER	Gene_Vitvi01g01020.t01	Gene_Vitvi01g01020.t01	transcript	Vitvi01g01020.t01	Coding		c.-1281A>G					1281	GT:PL:DP:AD 0\2:255,0,254:30:14,16 0\2:0,84,255:28:28,0
Noirv2.chr1 12520522 . G A 483.0 . DP=66;VDB=0.980552;SGB=-1.38611;MQSB=1;MQ0F=0;AC=4;AN=4;DP4=0,0,31,28;MQ=60;ANN=A	synonymous_variant	LOW	Gene_Vitvi01g01019.t01	Gene_Vitvi01g01019.t01	transcript	Vitvi01g01019.t01	Coding	3\2	c.1071G>A	p.Ala357Ala	1088\2390	1071\2211	357\202		WARNING_TRANSCRIPT_MULTIPLE_STOP_CODONS,A	upstream_gene_variant	MODIFIER	Gene_Vitvi01g01020.t01	Gene_Vitvi01g01020.t01	transcript	Vitvi01g01020.t01	Coding		c.-1149G>A					1149	GT:PL:DP:AD 1\2:255,93,0:31:0,31 1\2:255,84,0:28:0,28
Noirv2.chr1 12520618 . A G 221.0 . DP=62;VDB=0.571893;SGB=9.53539;RPB=0.992772;MQB=1;MQSB=1;BQB=0.785482;MQ0F=0;ICB=0.3;HOB=0.125;AC=1;AN=4;DP4=23,16,9,7;MQ=60;ANN=G	stop_retained_variant	LOW	Gene_Vitvi01g01019.t01	Gene_Vitvi01g01019.t01	transcript	Vitvi01g01019.t01	Coding	3\2	c.1167A>G	p.Ter389Ter	1184\2390	1167\2211	389\202		WARNING_TRANSCRIPT_MULTIPLE_STOP_CODONS,G	upstream_gene_variant	MODIFIER	Gene_Vitvi01g01020.t01	Gene_Vitvi01g01020.t01	transcript	Vitvi01g01020.t01	Coding		c.-1053A>G					1053	GT:PL:DP:AD 0\2:255,0,251:31:15,16 0\2:0,72,255:24:24,0
Noirv2.chr1 12520661 . G A 409.0 . DP=62;VDB=0.904832;SGB=-9.63298;RPB=0.550341;MQB=1;MQSB=1;BQB=0.906791;MQ0F=0;ICB=0.5;HOB=0.5;AC=2;AN=4;DP4=14,15,16,9;MQ=60;ANN=A	synonymous_variant	LOW	Gene_Vitvi01g01019.t01	Gene_Vitvi01g01019.t01	transcript	Vitvi01g01019.t01	Coding	3\2	c.1210G>A	p.???404???	1227\2390	1210\2211	404\202		WARNING_TRANSCRIPT_MULTIPLE_STOP_CODONS,A	upstream_gene_variant	MODIFIER	Gene_Vitvi01g01020.t01	Gene_Vitvi01g01020.t01	transcript	Vitvi01g01020.t01	Coding		c.-1010G>A					1010	GT:PL:DP:AD 0\2:229,0,255:28:16,12 0\2:213,0,246:26:13,13
Noirv2.chr1 12521733 . G T 451.0 . DP=56;VDB=0.44618;SGB=-10.8604;RPB=0.701915;MQB=1;MQSB=1;BQB=0.0432025;MQ0F=0;ICB=0.5;HOB=0.5;AC=2;AN=4;DP4=16,9,21,8;MQ=60;ANN=T	synonymous_variant	LOW	Gene_Vitvi01g01020.t01	Gene_Vitvi01g01020.t01	transcript	Vitvi01g01020.t01	Coding	1\2	c.63G>T	p.Thr21Thr	63\2788	63\2788	21\295		,T	downstream_gene_variant	MODIFIER	Gene_Vitvi01g01019.t01	Gene_Vitvi01g01019.t01	transcript	Vitvi01g01019.t01	Coding		c.*1071G>T					909	WARNING_TRANSCRIPT_MULTIPLE_STOP_CODONS GT:PL:DP:AD 0\2:255,0,255:35:17,18 0\2:229,0,94:19:8,11
Noirv2.chr1 12522168 . T C 220.0 . DP=69;VDB=0.0356722;SGB=8.84268;RPB=0.906231;MQB=1;MQSB=1;BQB=0.797045;MQ0F=0;ICB=0.3;HOB=0.125;AC=1;AN=4;DP4=26,23,10,5;MQ=60;ANN=C	synonymous_variant	LOW	Gene_Vitvi01g01020.t01	Gene_Vitvi01g01020.t01	transcript	Vitvi01g01020.t01	Coding	1\2	c.498T>C	p.Tyr166Tyr	498\2788	498\2788	166\295		,C	downstream_gene_variant	MODIFIER	Gene_Vitvi01g01019.t01	Gene_Vitvi01g01019.t01	transcript	Vitvi01g01019.t01	Coding		c.*1506T>C					1344	WARNING_TRANSCRIPT_MULTIPLE_STOP_CODONS GT:PL:DP:AD 0\2:0,93,255:31:31,0 0\2:254,0,255:33:18,15
Noirv2.chr1 12522441 . G C 221.0 . DP=63;VDB=0.98793;SGB=10.9211;RPB=0.81044;MQB=1;MQSB=1;BQB=0.713135;MQ0F=0;ICB=0.3;HOB=0.125;AC=1;AN=4;DP4=21,22,8,10;MQ=60;ANN=C	synonymous_variant	LOW	Gene_Vitvi01g01020.t01	Gene_Vitvi01g01020.t01	transcript	Vitvi01g01020.t01	Coding	1\2	c.771G>C	p.Val257Val	771\2788	771\2788	257\295		,C	downstream_gene_variant	MODIFIER	Gene_Vitvi01g01019.t01	Gene_Vitvi01g01019.t01	transcript	Vitvi01g01019.t01	Coding		c.*1779G>C					1617	WARNING_TRANSCRIPT_MULTIPLE_STOP_CODONS GT:PL:DP:AD 0\2:0,81,255:27:27,0 0\2:255,0,255:34:16,18
Noirv2.chr1 12522840 . G A 477.0 . DP=64;VDB=0.40228;SGB=-13.3152;RPB=0.9115;MQB=1;MQSB=1;BQB=0.752929;MQ0F=0;ICB=0.5;HOB=0.5;AC=2;AN=4;DP4=10,15,22,15;MQ=60;ANN=A	synonymous_variant	LOW	Gene_Vitvi01g01020.t01	Gene_Vitvi01g01020.t01	transcript	Vitvi01g01020.t01	Coding	1\2	c.1170G>A	p.Thr390Thr	1170\2788	1170\2788	390\295		,A	downstream_gene_variant	MODIFIER	Gene_Vitvi01g01019.t01	Gene_Vitvi01g01019.t01	transcript	Vitvi01g01019.t01	Coding		c.*2178G>A					2016	WARNING_TRANSCRIPT_MULTIPLE_STOP_CODONS GT:PL:DP:AD 0\2:255,0,215:35:13,22 0\2:255,0,214:27:12,15
Noirv2.chr1 12523026 . C T 483.0 . DP=61;VDB=0.897446;SGB=-1.36622;MQSB=1;MQ0F=0;AC=4;AN=4;DP4=0,0,21,27;MQ=60;ANN=T	synonymous_variant	LOW	Gene_Vitvi01g01020.t01	Gene_Vitvi01g01020.t01	transcript	Vitvi01g01020.t01	Coding	1\2	c.1356C>T	p.Asn452Asn	1356\2788	1356\2788	452\295		,T	downstream_gene_variant	MODIFIER	Gene_Vitvi01g01019.t01	Gene_Vitvi01g01019.t01	transcript	Vitvi01g01019.t01	Coding		c.*2364C>T					2202	WARNING_TRANSCRIPT_MULTIPLE_STOP_CODONS GT:PL:DP:AD 1\2:255,90,0:30:0,30 1\2:255,54,0:18:0,18
Noirv2.chr1 12523089 . G A 468.0 . DP=63;VDB=0.0655128;SGB=-1.02113;RPB=0.410428;MQB=1;MQSB=1;BQB=0.811111;MQ0F=0;ICB=0.3;HOB=0.125;AC=3;AN=4;DP4=4,7,25,21;MQ=60;ANN=A	synonymous_variant	LOW	Gene_Vitvi01g01020.t01	Gene_Vitvi01g01020.t01	transcript	Vitvi01g01020.t01	Coding	1\2	c.1419G>A	p.Glu473Glu	1419\2788	1419\2788	473\295		,A	downstream_gene_variant	MODIFIER	Gene_Vitvi01g01019.t01	Gene_Vitvi01g01019.t01	transcript	Vitvi01g01019.t01	Coding		c.*2427G>A					2265	WARNING_TRANSCRIPT_MULTIPLE_STOP_CODONS GT:PL:DP:AD 1\2:255,99,0:33:0,33 0\2:247,0,224:24:11,13
Noirv2.chr1 12523168 . T C 470.0 . DP=67;VDB=0.955993;SGB=-12.0878;RPB=0.915686;MQB=1;MQSB=1;BQB=0.177392;MQ0F=0;ICB=0.5;HOB=0.5;AC=2;AN=4;DP4=13,15,11,22;MQ=60;ANN=C	synonymous_variant	LOW	Gene_Vitvi01g01020.t01	Gene_Vitvi01g01020.t01	transcript	Vitvi01g01020.t01	Coding	1\2	c.1498T>C	p.Leu500Leu	1498\2788	1498\2788	500\295		,C	downstream_gene_variant	MODIFIER	Gene_Vitvi01g01019.t01	Gene_Vitvi01g01019.t01	transcript	Vitvi01g01019.t01	Coding		c.*2506T>C					2344	WARNING_TRANSCRIPT_MULTIPLE_STOP_CODONS GT:PL:DP:AD 0\2:255,0,255:36:19,17 0\2:248,0,190:25:9,16
Noirv2.chr1 12523266 . C T 221.0 . DP=64;VDB=0.357369;SGB=13.6932;RPB=0.99762;MQB=1;MQSB=1;BQB=0.843753;MQ0F=0;ICB=0.3;HOB=0.125;AC=1;AN=4;DP4=16,22,10,12;MQ=60;ANN=T	synonymous_variant	LOW	Gene_Vitvi01g01020.t01	Gene_Vitvi01g01020.t01	transcript	Vitvi01g01020.t01	Coding	1\2	c.1596C>T	p.Ala532Ala	1596\2788	1596\2788	532\295		,T	downstream_gene_variant	MODIFIER	Gene_Vitvi01g01019.t01	Gene_Vitvi01g01019.t01	transcript	Vitvi01g01019.t01	Coding		c.*2604C>T					2442	WARNING_TRANSCRIPT_MULTIPLE_STOP_CODONS GT:PL:DP:AD 0\2:255,0,255:40:18,22 0\2:0,60,255:20:20,0
Noirv2.chr1 12523356 . T G 221.0 . DP=77;VDB=0.291978;SGB=10.9211;RPB=0.329778;MQB=1;MQSB=1;BQB=0.49727;MQ0F=0;ICB=0.3;HOB=0.125;AC=1;AN=4;DP4=33,18,7,11;MQ=60;ANN=G	synonymous_variant	LOW	Gene_Vitvi01g01020.t01	Gene_Vitvi01g01020.t01	transcript	Vitvi01g01020.t01	Coding	1\2	c.1686T>G	p.Ala562Ala	1686\2788	1686\2788	562\295		,G	downstream_gene_variant	MODIFIER	Gene_Vitvi01g01019.t01	Gene_Vitvi01g01019.t01	transcript	Vitvi01g01019.t01	Coding		c.*2694T>G					2532	WARNING_TRANSCRIPT_MULTIPLE_STOP_CODONS GT:PL:DP:AD 0\2:255,0,255:41:23,18 0\2:0,84,255:28:28,0
Noirv2.chr1 12530395 . T A 112.0 . DP=37;VDB=0.0490877;SGB=3.31571;RPB=0.98489;MQB=0.589779;MQSB=0.801579;BQB=0.660191;MQ0F=0;ICB=0.3;HOB=0.125;AC=1;AN=4;DP4=17,13,5,2;MQ=53;ANN=A	5_prime_UTR_premature_start_codon_gain_variant	LOW	Gene_Vitvi01g01021.t01	Gene_Vitvi01g01021.t01	transcript	Vitvi01g01021.t01	Coding	1\2	c.-130T>A						WARNING_TRANSCRIPT_MULTIPLE_STOP_CODONS,A	5_prime_UTR_variant	MODIFIER	Gene_Vitvi01g01021.t01	Gene_Vitvi01g01021.t01	transcript	Vitvi01g01021.t01	Coding	1\2	c.-130T>A					130	WARNING_TRANSCRIPT_MULTIPLE_STOP_CODONS GT:PL:DP:AD 0\2:0,63,255:21:21,0 0\2:146,0,198:16:9,7
Noirv2.chr1 12530581 . T A 221.0 . DP=63;VDB=0.348106;SGB=13.0002;RPB=0.984242;MQB=0.246393;MQSB=0.951035;BQB=0.620847;MQ0F=0;ICB=0.3;HOB=0.125;AC=1;AN=4;DP4=16,23,8,13;MQ=39;ANN=A	synonymous_variant	LOW	Gene_Vitvi01g01021.t01	Gene_Vitvi01g01021.t01	transcript	Vitvi01g01021.t01	Coding	1\2	c.57T>A	p.Val19Val	401\2260	57\280	19\225		WARNING_TRANSCRIPT_MULTIPLE_STOP_CODONS GT:PL:DP:AD 0\2:255,0,255:37:16,21 0\2:0,69,255:23:23,0
Noirv2.chr1 12530852 . A G 170.0 . DP=55;VDB=0.00423321;SGB=6.76576;RPB=0.48888;MQB=0.0878579;MQSB=0.416857;BQB=0.464735;MQ0F=0;ICB=0.3;HOB=0.125;AC=1;AN=4;DP4=11,31,4,8;MQ=42;ANN=G	synonymous_variant	LOW	Gene_Vitvi01g01021.t01	Gene_Vitvi01g01021.t01	transcript	Vitvi01g01021.t01	Coding	2\2	c.234A>G	p.Pro78Pro	578\2260	234\280	78\225		WARNING_TRANSCRIPT_MULTIPLE_STOP_CODONS GT:PL:DP:AD 0\2:0,84,255:28:28,0 0\2:204,0,212:26:14,12
Noirv2.chr1 12530879 . G C 446.0 . DP=57;VDB=0.000332345;SGB=-1.37694;RPB=0.00101166;MQB=0.000472015;MQSB=0.599826;BQB=0.992062;MQ0F=0;ICB=0.3;HOB=0.125;AC=3;AN=4;DP4=1,10,14,30;MQ=42;ANN=C	splice_region_variant&intron_variant	LOW	Gene_Vitvi01g01021.t01	Gene_Vitvi01g01021.t01	transcript	Vitvi01g01021.t01	Coding	2\2	c.257+4G>C						WARNING_TRANSCRIPT_MULTIPLE_STOP_CODONS GT:PL:DP:AD 0\2:254,0,161:29:11,18 1\2:255,93,30:26:0,21
Noirv2.chr1 12531277 . T C 483.0 . DP=42;VDB=0.570076;SGB=-1.37897;MQSB=0.938094;MQ0F=0;AC=4;AN=4;DP4=0,0,26,13;MQ=47;ANN=C	splice_region_variant&intron_variant	LOW	Gene_Vitvi01g01021.t01	Gene_Vitvi01g01021.t01	transcript	Vitvi01g01021.t01	Coding	2\2	c.258-8T>C						WARNING_TRANSCRIPT_MULTIPLE_STOP_CODONS GT:PL:DP:AD 1\2:255,66,0:22:0,22 1\2:255,51,0:17:0,17
Noirv2.chr1 12531414 . T C 408.0 . DP=43;VDB=0.454439;SGB=-1.08818;RPB=0.354918;MQB=0.000573694;MQSB=0.50037;BQB=0.198187;MQ0F=0;ICB=0.3;HOB=0.125;AC=3;AN=4;DP4=5,1,21,13;MQ=41;ANN=C	synonymous_variant	LOW	Gene_Vitvi01g01021.t01	Gene_Vitvi01g01021.t01	transcript	Vitvi01g01021.t01	Coding	3\2	c.387T>C	p.Ser129Ser	731\2260	387\280	129\225		WARNING_TRANSCRIPT_MULTIPLE_STOP_CODONS GT:PL:DP:AD 1\2:255,72,0:24:0,24 0\2:187,0,105:16:6,10
Noirv2.chr1 12531477 . A G 486.0 . DP=39;VDB=0.810044;SGB=-1.38136;RPB=0.557143;MQB=0.457143;MQSB=0.944725;BQB=0.185714;MQ0F=0;AC=4;AN=4;DP4=1,1,15,20;MQ=44;ANN=G	synonymous_variant	LOW	Gene_Vitvi01g01021.t01	Gene_Vitvi01g01021.t01	transcript	Vitvi01g01021.t01	Coding	3\2	c.450A>G	p.Arg150Arg	794\2260	450\280	150\225		WARNING_TRANSCRIPT_MULTIPLE_STOP_CODONS GT:PL:DP:AD 1\2:255,0,0:20:2,18 1\2:255,51,0:17:0,17
Noirv2.chr1 12531589 . G A 433.0 . DP=48;VDB=0.395954;SGB=-1.26603;RPB=0.157395;MQB=0.81115;MQSB=0.894377;BQB=0.973076;MQ0F=0;ICB=0.3;HOB=0.125;AC=3;AN=4;DP4=1,5,14,22;MQ=56;ANN=A	synonymous_variant	LOW	Gene_Vitvi01g01021.t01	Gene_Vitvi01g01021.t01	transcript	Vitvi01g01021.t01	Coding	4\2	c.492G>A	p.Thr164Thr	836\2260	492\280	164\225		WARNING_TRANSCRIPT_MULTIPLE_STOP_CODONS GT:PL:DP:AD 1\2:255,72,0:24:0,24 0\2:212,0,122:18:6,12
Noirv2.chr1 12541804 . A G 483.0 . DP=53;VDB=0.195977;SGB=-1.37729;MQSB=1;MQ0F=0;AC=4;AN=4;DP4=0,0,29,22;MQ=60;ANN=G	synonymous_variant	LOW	Gene_Vitvi01g01022.t01	Gene_Vitvi01g01022.t01	transcript	Vitvi01g01022.t01	Coding	1\2	c.438A>G	p.Gln146Gln	443\2954	438\2911	146\236		GT:PL:DP:AD 1\2:255,93,0:31:0,31 1\2:255,60,0:20:0,20
Noirv2.chr1 12541876 . T C 483.0 . DP=49;VDB=0.859254;SGB=-1.37578;MQSB=1;MQ0F=0;AC=4;AN=4;DP4=0,0,24,17;MQ=60;ANN=C	synonymous_variant	LOW	Gene_Vitvi01g01022.t01	Gene_Vitvi01g01022.t01	transcript	Vitvi01g01022.t01	Coding	1\2	c.510T>C	p.Cys170Cys	515\2954	510\2911	170\236		GT:PL:DP:AD 1\2:255,72,0:24:0,24 1\2:255,51,0:17:0,17
Noirv2.chr1 12546361 . G A 185.0 . DP=70;VDB=0.212724;SGB=6.76576;RPB=0.997296;MQB=1;MQSB=1;BQB=0.238802;MQ0F=0;ICB=0.3;HOB=0.125;AC=1;AN=4;DP4=23,32,5,7;MQ=60;ANN=A	synonymous_variant	LOW	Gene_Vitvi01g01022.t01	Gene_Vitvi01g01022.t01	transcript	Vitvi01g01022.t01	Coding	2\2	c.960G>A	p.Thr320Thr	965\2954	960\2911	320\236		GT:PL:DP:AD 0\2:0,108,255:36:36,0 0\2:219,0,255:31:19,12
Noirv2.chr1 12546732 . G A 483.0 . DP=77;VDB=0.0828497;SGB=-1.38628;MQSB=1;MQ0F=0;AC=4;AN=4;DP4=0,0,27,46;MQ=60;ANN=A	synonymous_variant	LOW	Gene_Vitvi01g01022.t01	Gene_Vitvi01g01022.t01	transcript	Vitvi01g01022.t01	Coding	3\2	c.1221G>A	p.Thr407Thr	1226\2954	1221\2911	407\236		GT:PL:DP:AD 1\2:255,111,0:37:0,37 1\2:255,108,0:36:0,36
Noirv2.chr1 12546750 . A T 483.0 . DP=72;VDB=0.0776397;SGB=-1.38626;MQSB=1;MQ0F=0;AC=4;AN=4;DP4=0,0,26,42;MQ=60;ANN=T	synonymous_variant	LOW	Gene_Vitvi01g01022.t01	Gene_Vitvi01g01022.t01	transcript	Vitvi01g01022.t01	Coding	3\2	c.1239A>T	p.Ala413Ala	1244\2954	1239\2911	413\236		GT:PL:DP:AD 1\2:255,102,0:34:0,34 1\2:255,102,0:34:0,34
Noirv2.chr1 12547997 . T C 483.0 . DP=78;VDB=0.462685;SGB=-1.38626;MQSB=1;MQ0F=0;AC=4;AN=4;DP4=0,0,39,32;MQ=60;ANN=C	synonymous_variant	LOW	Gene_Vitvi01g01022.t01	Gene_Vitvi01g01022.t01	transcript	Vitvi01g01022.t01	Coding	4\2	c.1290T>C	p.Asn430Asn	1295\2954	1290\2911	430\236		GT:PL:DP:AD 1\2:255,111,0:37:0,37 1\2:255,102,0:34:0,34
Noirv2.chr1 12548111 . C T 483.0 . DP=78;VDB=0.645412;SGB=-1.38623;MQSB=1;MQ0F=0;AC=4;AN=4;DP4=0,0,38,34;MQ=60;ANN=T	synonymous_variant	LOW	Gene_Vitvi01g01022.t01	Gene_Vitvi01g01022.t01	transcript	Vitvi01g01022.t01	Coding	4\2	c.1404C>T	p.Ile468Ile	1409\2954	1404\2911	468\236		GT:PL:DP:AD 1\2:255,117,0:39:0,39 1\2:255,99,0:33:0,33
Noirv2.chr1 12548258 . A G 196.0 . DP=67;VDB=0.154594;SGB=8.15014;RPB=0.363946;MQB=1;MQSB=1;BQB=0.511891;MQ0F=0;ICB=0.3;HOB=0.125;AC=1;AN=4;DP4=26,23,3,11;MQ=60;ANN=G	synonymous_variant	LOW	Gene_Vitvi01g01022.t01	Gene_Vitvi01g01022.t01	transcript	Vitvi01g01022.t01	Coding	5\2	c.1482A>G	p.Leu494Leu	1487\2954	1482\2911	494\236		GT:PL:DP:AD 0\2:0,105,255:35:35,0 0\2:230,0,255:28:14,14
Noirv2.chr1 12549032 . A G 483.0 . DP=64;VDB=0.00324124;SGB=-1.38617;MQSB=1;MQ0F=0;AC=4;AN=4;DP4=0,0,32,27;MQ=60;ANN=G	synonymous_variant	LOW	Gene_Vitvi01g01022.t01	Gene_Vitvi01g01022.t01	transcript	Vitvi01g01022.t01	Coding	6\2	c.1623A>G	p.Ala541Ala	1628\2954	1623\2911	541\236		GT:PL:DP:AD 1\2:255,90,0:30:0,30 1\2:255,87,0:29:0,29
Noirv2.chr1 12549363 . A G 96.0 . DP=65;VDB=0.572009;SGB=2.63044;RPB=0.991168;MQB=1;MQSB=1;BQB=0.985733;MQ0F=0;ICB=0.3;HOB=0.125;AC=1;AN=4;DP4=36,19,3,3;MQ=60;ANN=G	synonymous_variant	LOW	Gene_Vitvi01g01022.t01	Gene_Vitvi01g01022.t01	transcript	Vitvi01g01022.t01	Coding	7\2	c.1755A>G	p.Gly585Gly	1760\2954	1755\2911	585\236		GT:PL:DP:AD 0\2:0,120,255:40:40,0 0\2:130,0,255:21:15,6
Noirv2.chr1 12549375 . T C 221.0 . DP=66;VDB=0.19958;SGB=8.84268;RPB=0.381146;MQB=1;MQSB=1;BQB=0.998347;MQ0F=0;ICB=0.3;HOB=0.125;AC=1;AN=4;DP4=29,18,7,8;MQ=60;ANN=C	synonymous_variant	LOW	Gene_Vitvi01g01022.t01	Gene_Vitvi01g01022.t01	transcript	Vitvi01g01022.t01	Coding	7\2	c.1767T>C	p.Val589Val	1772\2954	1767\2911	589\236		GT:PL:DP:AD 0\2:0,123,255:41:41,0 0\2:255,0,127:21:6,15
Noirv2.chr1 12549381 . T C 483.0 . DP=70;VDB=0.960449;SGB=-1.37788;MQSB=1;MQ0F=0;AC=4;AN=4;DP4=0,0,37,28;MQ=60;ANN=C	synonymous_variant	LOW	Gene_Vitvi01g01022.t01	Gene_Vitvi01g01022.t01	transcript	Vitvi01g01022.t01	Coding	7\2	c.1773T>C	p.Tyr591Tyr	1778\2954	1773\2911	591\236		GT:PL:DP:AD 1\2:255,123,0:41:0,41 1\2:255,72,0:24:0,24
Noirv2.chr1 12549411 . G A 221.0 . DP=63;VDB=0.801847;SGB=7.4578;RPB=0.996344;MQB=1;MQSB=1;BQB=0.901071;MQ0F=0;ICB=0.3;HOB=0.125;AC=1;AN=4;DP4=26,18,7,6;MQ=60;ANN=A	synonymous_variant	LOW	Gene_Vitvi01g01022.t01	Gene_Vitvi01g01022.t01	transcript	Vitvi01g01022.t01	Coding	7\2	c.1803G>A	p.Gly601Gly	1808\2954	1803\2911	601\236		GT:PL:DP:AD 0\2:0,111,255:37:37,0 0\2:255,0,163:20:7,13
Noirv2.chr1 12549486 . A G 221.0 . DP=65;VDB=0.351783;SGB=9.53539;RPB=0.0522618;MQB=1;MQSB=1;BQB=0.997061;MQ0F=0;ICB=0.3;HOB=0.125;AC=1;AN=4;DP4=19,24,7,9;MQ=60;ANN=G	synonymous_variant	LOW	Gene_Vitvi01g01022.t01	Gene_Vitvi01g01022.t01	transcript	Vitvi01g01022.t01	Coding	7\2	c.1878A>G	p.Glu626Glu	1883\2954	1878\2911	626\236		GT:PL:DP:AD 0\2:0,111,255:37:37,0 0\2:255,0,120:22:6,16
Noirv2.chr1 12561745 . A G 381.0 . DP=58;VDB=0.547226;SGB=-12.7015;RPB=0.958822;MQB=1;MQSB=1;BQB=0.664095;MQ0F=0;ICB=0.3;HOB=0.125;AC=3;AN=4;DP4=5,8,21,14;MQ=60;ANN=G	synonymous_variant	LOW	Gene_Vitvi01g01023.t01	Gene_Vitvi01g01023.t01	transcript	Vitvi01g01023.t01	Coding	1\2	c.285A>G	p.Gly95Gly	403\220	285\202	95\233		,G	downstream_gene_variant	MODIFIER	Gene_Vitvi01g01024.t01	Gene_Vitvi01g01024.t01	transcript	Vitvi01g01024.t01	Coding		c.*2981T>C					418	GT:PL:DP:AD 1\2:255,81,0:27:0,27 0\2:160,0,255:21:13,8
Noirv2.chr1 12561874 . G A 110.0 . DP=44;VDB=0.697961;SGB=2.63044;RPB=0.982226;MQB=1;MQSB=1;BQB=0.978534;MQ0F=0;ICB=0.3;HOB=0.125;AC=1;AN=4;DP4=19,15,2,4;MQ=60;ANN=A	synonymous_variant	LOW	Gene_Vitvi01g01023.t01	Gene_Vitvi01g01023.t01	transcript	Vitvi01g01023.t01	Coding	1\2	c.414G>A	p.Lys138Lys	532\220	414\202	138\233		,A	downstream_gene_variant	MODIFIER	Gene_Vitvi01g01024.t01	Gene_Vitvi01g01024.t01	transcript	Vitvi01g01024.t01	Coding		c.*2852C>T					289	GT:PL:DP:AD 0\2:0,72,255:24:24,0 0\2:144,0,180:16:10,6
Noirv2.chr1 12564837 . A G 391.0 . DP=45;VDB=0.772802;SGB=-8.71242;RPB=0.841831;MQB=1;MQSB=1;BQB=0.629339;MQ0F=0;ICB=0.5;HOB=0.5;AC=2;AN=4;DP4=10,12,14,8;MQ=60;ANN=G	synonymous_variant	LOW	Gene_Vitvi01g01024.t01	Gene_Vitvi01g01024.t01	transcript	Vitvi01g01024.t01	Coding	6\2	c.912T>C	p.Thr304Thr	1228\2713	912\2023	304\240		,G	downstream_gene_variant	MODIFIER	Gene_Vitvi01g01023.t01	Gene_Vitvi01g01023.t01	transcript	Vitvi01g01023.t01	Coding		c.*2675A>G					2675	GT:PL:DP:AD 0\2:252,0,246:25:12,13 0\2:172,0,214:19:10,9
Noirv2.chr1 12564912 . G A 221.0 . DP=60;VDB=0.636381;SGB=9.53539;RPB=0.999645;MQB=1;MQSB=1;BQB=0.466868;MQ0F=0;ICB=0.3;HOB=0.125;AC=1;AN=4;DP4=23,18,7,9;MQ=60;ANN=A	synonymous_variant	LOW	Gene_Vitvi01g01024.t01	Gene_Vitvi01g01024.t01	transcript	Vitvi01g01024.t01	Coding	6\2	c.837C>T	p.Asn279Asn	1153\2713	837\2023	279\240		,A	downstream_gene_variant	MODIFIER	Gene_Vitvi01g01023.t01	Gene_Vitvi01g01023.t01	transcript	Vitvi01g01023.t01	Coding		c.*2750G>A					2750	GT:PL:DP:AD 0\2:0,93,255:31:31,0 0\2:255,0,193:26:10,16
Noirv2.chr1 12564942 . C T 213.0 . DP=66;VDB=0.308824;SGB=8.84268;RPB=0.322709;MQB=1;MQSB=1;BQB=0.996628;MQ0F=0;ICB=0.3;HOB=0.125;AC=1;AN=4;DP4=24,23,9,6;MQ=60;ANN=T	synonymous_variant	LOW	Gene_Vitvi01g01024.t01	Gene_Vitvi01g01024.t01	transcript	Vitvi01g01024.t01	Coding	6\2	c.807G>A	p.Ser269Ser	1123\2713	807\2023	269\240		,T	downstream_gene_variant	MODIFIER	Gene_Vitvi01g01023.t01	Gene_Vitvi01g01023.t01	transcript	Vitvi01g01023.t01	Coding		c.*2780C>T					2780	GT:PL:DP:AD 0\2:247,0,255:34:19,15 0\2:0,84,255:28:28,0
Noirv2.chr1 12564978 . G A 221.0 . DP=64;VDB=0.939074;SGB=8.15014;RPB=0.989026;MQB=1;MQSB=1;BQB=0.838148;MQ0F=0;ICB=0.3;HOB=0.125;AC=1;AN=4;DP4=22,24,7,7;MQ=60;ANN=A	synonymous_variant	LOW	Gene_Vitvi01g01024.t01	Gene_Vitvi01g01024.t01	transcript	Vitvi01g01024.t01	Coding	6\2	c.771C>T	p.Ile257Ile	1087\2713	771\2023	257\240		,A	downstream_gene_variant	MODIFIER	Gene_Vitvi01g01023.t01	Gene_Vitvi01g01023.t01	transcript	Vitvi01g01023.t01	Coding		c.*2816G>A					2816	GT:PL:DP:AD 0\2:0,102,255:34:34,0 0\2:255,0,228:26:12,14
Noirv2.chr1 12565146 . A C 96.0 . DP=58;VDB=0.6577;SGB=2.63044;RPB=0.933295;MQB=1;MQSB=1;BQB=0.387915;MQ0F=0;ICB=0.3;HOB=0.125;AC=1;AN=4;DP4=31,17,5,1;MQ=60;ANN=C	synonymous_variant	LOW	Gene_Vitvi01g01024.t01	Gene_Vitvi01g01024.t01	transcript	Vitvi01g01024.t01	Coding	6\2	c.603T>G	p.Gly201Gly	919\2713	603\2023	201\240		,C	downstream_gene_variant	MODIFIER	Gene_Vitvi01g01023.t01	Gene_Vitvi01g01023.t01	transcript	Vitvi01g01023.t01	Coding		c.*2984A>C					2984	GT:PL:DP:AD 0\2:0,102,255:34:34,0 0\2:130,0,235:20:14,6
Noirv2.chr1 12565203 . A G 151.0 . DP=63;VDB=0.45117;SGB=4.69269;RPB=0.890564;MQB=1;MQSB=1;BQB=0.997071;MQ0F=0;ICB=0.3;HOB=0.125;AC=1;AN=4;DP4=28,20,6,3;MQ=60;ANN=G	synonymous_variant	LOW	Gene_Vitvi01g01024.t01	Gene_Vitvi01g01024.t01	transcript	Vitvi01g01024.t01	Coding	6\2	c.546T>C	p.Ser182Ser	862\2713	546\2023	182\240		,G	downstream_gene_variant	MODIFIER	Gene_Vitvi01g01023.t01	Gene_Vitvi01g01023.t01	transcript	Vitvi01g01023.t01	Coding		c.*3041A>G					3041	GT:PL:DP:AD 0\2:0,90,255:30:30,0 0\2:185,0,255:27:18,9
Noirv2.chr1 12565656 . A G 215.0 . DP=80;VDB=0.682757;SGB=8.15014;RPB=0.229981;MQB=1;MQSB=1;BQB=0.832909;MQ0F=0;ICB=0.3;HOB=0.125;AC=1;AN=4;DP4=26,32,5,9;MQ=60;ANN=G	synonymous_variant	LOW	Gene_Vitvi01g01024.t01	Gene_Vitvi01g01024.t01	transcript	Vitvi01g01024.t01	Coding	4\2	c.285T>C	p.His95His	601\2713	285\2023	95\240		,G	downstream_gene_variant	MODIFIER	Gene_Vitvi01g01023.t01	Gene_Vitvi01g01023.t01	transcript	Vitvi01g01023.t01	Coding		c.*3494A>G					3494	GT:PL:DP:AD 0\2:0,114,255:38:38,0 0\2:249,0,255:34:20,14
Noirv2.chr1 12565931 . C T 483.0 . DP=82;VDB=0.28488;SGB=-1.38362;MQSB=1;MQ0F=0;AC=4;AN=4;DP4=0,0,39,38;MQ=60;ANN=T	synonymous_variant	LOW	Gene_Vitvi01g01024.t01	Gene_Vitvi01g01024.t01	transcript	Vitvi01g01024.t01	Coding	2\2	c.180G>A	p.Leu60Leu	496\2713	180\2023	60\240		,T	downstream_gene_variant	MODIFIER	Gene_Vitvi01g01023.t01	Gene_Vitvi01g01023.t01	transcript	Vitvi01g01023.t01	Coding		c.*3769C>T					3769	,T	downstream_gene_variant	MODIFIER	Gene_Vitvi01g02133.t01	Gene_Vitvi01g02133.t01	transcript	Vitvi01g02133.t01	Coding		c.*4923G>A					4923	GT:PL:DP:AD 1\2:255,144,0:48:0,48 1\2:255,87,0:29:0,29
Noirv2.chr1 12566099 . A G 221.0 . DP=68;VDB=0.326291;SGB=8.15014;RPB=0.9854;MQB=1;MQSB=1;BQB=0.203774;MQ0F=0;ICB=0.3;HOB=0.125;AC=1;AN=4;DP4=29,18,6,8;MQ=60;ANN=G	splice_region_variant&intron_variant	LOW	Gene_Vitvi01g01024.t01	Gene_Vitvi01g01024.t01	transcript	Vitvi01g01024.t01	Coding	1\2	c.118+8T>C						,G	downstream_gene_variant	MODIFIER	Gene_Vitvi01g01023.t01	Gene_Vitvi01g01023.t01	transcript	Vitvi01g01023.t01	Coding		c.*3937A>G					3937	,G	downstream_gene_variant	MODIFIER	Gene_Vitvi01g02133.t01	Gene_Vitvi01g02133.t01	transcript	Vitvi01g02133.t01	Coding		c.*4755T>C					4755	GT:PL:DP:AD 0\2:0,111,255:37:37,0 0\2:255,0,199:24:10,14
Noirv2.chr1 12598938 . G A 35.1953 . DP=10;VDB=0.112085;SGB=-3.1648;RPB=0.279932;MQB=0.167959;BQB=0.503877;MQ0F=0;ICB=0.5;HOB=0.5;AC=2;AN=4;DP4=0,6,0,4;MQ=23;ANN=A	synonymous_variant	LOW	Gene_Vitvi01g02134.t01	Gene_Vitvi01g02134.t01	transcript	Vitvi01g02134.t01	Coding	2\2	c.85C>T	p.Leu29Leu	86\271	85\270	29\255		WARNING_TRANSCRIPT_MULTIPLE_STOP_CODONS GT:PL:DP:AD 0\2:29,0,11:3:1,2 0\2:39,0,59:7:5,2
Noirv2.chr1 12606758 . A T 159.0 . DP=53;VDB=0.268014;SGB=5.38303;RPB=0.999933;MQB=1;MQSB=1;BQB=0.897792;MQ0F=0;ICB=0.3;HOB=0.125;AC=1;AN=4;DP4=18,24,3,7;MQ=60;ANN=T	splice_region_variant&intron_variant	LOW	Gene_Vitvi01g01026.t01	Gene_Vitvi01g01026.t01	transcript	Vitvi01g01026.t01	Coding	1\2	c.166-8A>T						WARNING_TRANSCRIPT_MULTIPLE_STOP_CODONS,T	upstream_gene_variant	MODIFIER	Gene_Vitvi01g01025.t01	Gene_Vitvi01g01025.t01	transcript	Vitvi01g01025.t01	Coding		c.-1705T>A					1705	GT:PL:DP:AD 0\2:0,87,255:29:29,0 0\2:193,0,248:23:13,10
Noirv2.chr1 12606771 . T C 131.0 . DP=43;VDB=0.273392;SGB=4.00342;RPB=0.780134;MQB=1;MQSB=1;BQB=0.862211;MQ0F=0;ICB=0.3;HOB=0.125;AC=1;AN=4;DP4=17,17,3,5;MQ=60;ANN=C	synonymous_variant	LOW	Gene_Vitvi01g01026.t01	Gene_Vitvi01g01026.t01	transcript	Vitvi01g01026.t01	Coding	2\2	c.171T>C	p.Leu57Leu	375\2104	171\2433	57\276		WARNING_TRANSCRIPT_MULTIPLE_STOP_CODONS,C	upstream_gene_variant	MODIFIER	Gene_Vitvi01g01025.t01	Gene_Vitvi01g01025.t01	transcript	Vitvi01g01025.t01	Coding		c.-1718A>G					1718	GT:PL:DP:AD 0\2:0,72,255:24:24,0 0\2:165,0,206:18:10,8
Noirv2.chr1 12606953 . G A 340.0 . DP=51;VDB=0.345169;SGB=-12.3947;RPB=0.960602;MQB=1;MQSB=1;BQB=0.985634;MQ0F=0;ICB=0.3;HOB=0.125;AC=3;AN=4;DP4=8,6,19,15;MQ=60;ANN=A	stop_retained_variant	LOW	Gene_Vitvi01g01026.t01	Gene_Vitvi01g01026.t01	transcript	Vitvi01g01026.t01	Coding	2\2	c.353G>A	p.Ter118Ter	557\2104	353\2433	118\276		WARNING_TRANSCRIPT_MULTIPLE_STOP_CODONS,A	upstream_gene_variant	MODIFIER	Gene_Vitvi01g01025.t01	Gene_Vitvi01g01025.t01	transcript	Vitvi01g01025.t01	Coding		c.-1900C>T					1900	GT:PL:DP:AD 1\2:255,84,0:28:0,28 0\2:119,0,255:20:14,6
Noirv2.chr1 12607224 . G A 166.0 . DP=57;VDB=0.522432;SGB=5.38303;RPB=0.20761;MQB=1;MQSB=1;BQB=0.856327;MQ0F=0;ICB=0.3;HOB=0.125;AC=1;AN=4;DP4=21,22,5,5;MQ=60;ANN=A	synonymous_variant	LOW	Gene_Vitvi01g01026.t01	Gene_Vitvi01g01026.t01	transcript	Vitvi01g01026.t01	Coding	2\2	c.624G>A	p.Pro208Pro	828\2104	624\2433	208\276		WARNING_TRANSCRIPT_MULTIPLE_STOP_CODONS,A	upstream_gene_variant	MODIFIER	Gene_Vitvi01g01025.t01	Gene_Vitvi01g01025.t01	transcript	Vitvi01g01025.t01	Coding		c.-2171C>T					2171	GT:PL:DP:AD 0\2:0,96,255:32:32,0 0\2:200,0,219:21:11,10
Noirv2.chr1 12607482 . T C 483.0 . DP=60;VDB=0.389862;SGB=-1.38414;MQSB=1;MQ0F=0;AC=4;AN=4;DP4=0,0,34,13;MQ=60;ANN=C	synonymous_variant	LOW	Gene_Vitvi01g01026.t01	Gene_Vitvi01g01026.t01	transcript	Vitvi01g01026.t01	Coding	2\2	c.882T>C	p.Phe294Phe	1086\2104	882\2433	294\276		WARNING_TRANSCRIPT_MULTIPLE_STOP_CODONS,C	upstream_gene_variant	MODIFIER	Gene_Vitvi01g01025.t01	Gene_Vitvi01g01025.t01	transcript	Vitvi01g01025.t01	Coding		c.-2429A>G					2429	GT:PL:DP:AD 1\2:255,78,0:26:0,26 1\2:255,63,0:21:0,21
Noirv2.chr1 12607923 . G A 476.0 . DP=74;VDB=0.996855;SGB=-1.31087;RPB=0.445832;MQB=1;MQSB=1;BQB=0.103725;MQ0F=0;ICB=0.3;HOB=0.125;AC=3;AN=4;DP4=3,10,25,30;MQ=60;ANN=A	synonymous_variant	LOW	Gene_Vitvi01g01026.t01	Gene_Vitvi01g01026.t01	transcript	Vitvi01g01026.t01	Coding	2\2	c.1323G>A	p.Arg441Arg	1527\2104	1323\2433	441\276		WARNING_TRANSCRIPT_MULTIPLE_STOP_CODONS,A	upstream_gene_variant	MODIFIER	Gene_Vitvi01g01025.t01	Gene_Vitvi01g01025.t01	transcript	Vitvi01g01025.t01	Coding		c.-2870C>T					2870	GT:PL:DP:AD 1\2:255,111,0:37:0,37 0\2:255,0,222:31:13,18
Noirv2.chr1 12613132 . T C 221.0 . DP=59;VDB=0.347861;SGB=11.6141;RPB=0.633328;MQB=1;MQSB=1;BQB=0.926988;MQ0F=0;ICB=0.3;HOB=0.125;AC=1;AN=4;DP4=19,17,8,11;MQ=60;ANN=C	5_prime_UTR_premature_start_codon_gain_variant	LOW	Gene_Vitvi01g01027.t01	Gene_Vitvi01g01027.t01	transcript	Vitvi01g01027.t01	Coding	1\2	c.-207T>C						,C	5_prime_UTR_variant	MODIFIER	Gene_Vitvi01g01027.t01	Gene_Vitvi01g01027.t01	transcript	Vitvi01g01027.t01	Coding	1\2	c.-207T>C					207	,C	downstream_gene_variant	MODIFIER	Gene_Vitvi01g01026.t01	Gene_Vitvi01g01026.t01	transcript	Vitvi01g01026.t01	Coding		c.*5099T>C					4632	WARNING_TRANSCRIPT_MULTIPLE_STOP_CODONS,C	downstream_gene_variant	MODIFIER	Gene_Vitvi01g01028.t01	Gene_Vitvi01g01028.t01
Noirv2.chr1 12613533 . T C 483.0 . DP=65;VDB=0.0618736;SGB=-1.38595;MQSB=1;MQ0F=0;AC=4;AN=4;DP4=0,0,29,30;MQ=60;ANN=C	synonymous_variant	LOW	Gene_Vitvi01g01027.t01	Gene_Vitvi01g01027.t01	transcript	Vitvi01g01027.t01	Coding	1\2	c.195T>C	p.Asp65Asp	490\2042	195\279	65\292		,C	downstream_gene_variant	MODIFIER	Gene_Vitvi01g01028.t01	Gene_Vitvi01g01028.t01	transcript	Vitvi01g01028.t01	Coding		c.*1501A>G					1249	WARNING_TRANSCRIPT_MULTIPLE_STOP_CODONS GT:PL:DP:AD 1\2:255,96,0:32:0,32 1\2:255,81,0:27:0,27
Noirv2.chr1 12613566 . T C 221.0 . DP=63;VDB=0.13933;SGB=6.76576;RPB=0.483724;MQB=1;MQSB=1;BQB=0.992537;MQ0F=0;ICB=0.3;HOB=0.125;AC=1;AN=4;DP4=22,25,7,5;MQ=60;ANN=C	synonymous_variant	LOW	Gene_Vitvi01g01027.t01	Gene_Vitvi01g01027.t01	transcript	Vitvi01g01027.t01	Coding	1\2	c.228T>C	p.His76His	523\2042	228\279	76\292		,C	downstream_gene_variant	MODIFIER	Gene_Vitvi01g01028.t01	Gene_Vitvi01g01028.t01	transcript	Vitvi01g01028.t01	Coding		c.*1468A>G					1216	WARNING_TRANSCRIPT_MULTIPLE_STOP_CODONS GT:PL:DP:AD 0\2:0,102,255:34:34,0 0\2:255,0,255:25:13,12
Noirv2.chr1 12613590 . G A 412.0 . DP=59;VDB=0.973291;SGB=-0.754231;RPB=0.826808;MQB=1;MQSB=1;BQB=0.977712;MQ0F=0;ICB=0.3;HOB=0.125;AC=3;AN=4;DP4=5,6,28,18;MQ=60;ANN=A	synonymous_variant	LOW	Gene_Vitvi01g01027.t01	Gene_Vitvi01g01027.t01	transcript	Vitvi01g01027.t01	Coding	1\2	c.252G>A	p.Glu84Glu	547\2042	252\279	84\292		,A	downstream_gene_variant	MODIFIER	Gene_Vitvi01g01028.t01	Gene_Vitvi01g01028.t01	transcript	Vitvi01g01028.t01	Coding		c.*1444C>T					1192	WARNING_TRANSCRIPT_MULTIPLE_STOP_CODONS GT:PL:DP:AD 1\2:255,102,0:34:0,34 0\2:191,0,218:23:11,12
Noirv2.chr1 12613683 . G T 221.0 . DP=62;VDB=0.174133;SGB=10.2282;RPB=0.424973;MQB=1;MQSB=1;BQB=0.863988;MQ0F=0;ICB=0.3;HOB=0.125;AC=1;AN=4;DP4=23,17,11,6;MQ=60;ANN=T	synonymous_variant	LOW	Gene_Vitvi01g01027.t01	Gene_Vitvi01g01027.t01	transcript	Vitvi01g01027.t01	Coding	1\2	c.345G>T	p.Leu115Leu	640\2042	345\279	115\292		,T	downstream_gene_variant	MODIFIER	Gene_Vitvi01g01028.t01	Gene_Vitvi01g01028.t01	transcript	Vitvi01g01028.t01	Coding		c.*1351C>A					1099	WARNING_TRANSCRIPT_MULTIPLE_STOP_CODONS GT:PL:DP:AD 0\2:255,0,255:36:19,17 0\2:0,63,255:21:21,0
Noirv2.chr1 12614778 . AATATA AATATATA 221.0 . INDEL;IDV=23;IMF=0.560976;DP=66;VDB=0.980835;SGB=13.6932;MQSB=0.979149;MQ0F=0;ICB=0.3;HOB=0.125;AC=1;AN=4;DP4=18,26,14,8;MQ=59;ANN=AATATATA	splice_region_variant	LOW	Gene_Vitvi01g01028.t01	Gene_Vitvi01g01028.t01	transcript	Vitvi01g01028.t01	Coding	3\2	c.*250_*251insTA						WARNING_TRANSCRIPT_MULTIPLE_STOP_CODONS,AATATATA	3_prime_UTR_variant	MODIFIER	Gene_Vitvi01g01028.t01	Gene_Vitvi01g01028.t01	transcript	Vitvi01g01028.t01	Coding	3\2	c.*250_*251insTA					250	WARNING_TRANSCRIPT_MULTIPLE_STOP_CODONS,AATATATA	downstream_gene_variant	MODIFIER	Gene_Vitvi01g01027.t01	Gene_Vitvi01g01027.t01	transcript	Vitvi01g01027.t01	Coding		c.*865_*866dupTA					699	GT:PL:DP:AD 0\2:255,0,255:41:19,22 0\2:0,75,255:25:25,0
Noirv2.chr1 12615177 . T G 221.0 . DP=75;VDB=0.277506;SGB=11.6141;RPB=0.170176;MQB=1;MQSB=1;BQB=0.990431;MQ0F=0;ICB=0.3;HOB=0.125;AC=1;AN=4;DP4=19,32,11,8;MQ=60;ANN=G	synonymous_variant	LOW	Gene_Vitvi01g01028.t01	Gene_Vitvi01g01028.t01	transcript	Vitvi01g01028.t01	Coding	3\2	c.1230A>C	p.Ile410Ile	1665\2060	1230\2373	410\256		WARNING_TRANSCRIPT_MULTIPLE_STOP_CODONS,G	downstream_gene_variant	MODIFIER	Gene_Vitvi01g01027.t01	Gene_Vitvi01g01027.t01	transcript	Vitvi01g01027.t01	Coding		c.*1260T>G					1092	GT:PL:DP:AD 0\2:255,0,229:35:16,19 0\2:0,105,255:35:35,0
Noirv2.chr1 12615315 . T G 221.0 . DP=58;VDB=0.926411;SGB=9.53539;RPB=0.477915;MQB=1;MQSB=1;BQB=0.768621;MQ0F=0;ICB=0.3;HOB=0.125;AC=1;AN=4;DP4=19,21,8,8;MQ=60;ANN=G	synonymous_variant	LOW	Gene_Vitvi01g01028.t01	Gene_Vitvi01g01028.t01	transcript	Vitvi01g01028.t01	Coding	3\2	c.1092A>C	p.Pro364Pro	1527\2060	1092\2373	364\256		WARNING_TRANSCRIPT_MULTIPLE_STOP_CODONS,G	downstream_gene_variant	MODIFIER	Gene_Vitvi01g01027.t01	Gene_Vitvi01g01027.t01	transcript	Vitvi01g01027.t01	Coding		c.*1398T>G					1230	GT:PL:DP:AD 0\2:255,0,206:26:10,16 0\2:0,90,255:30:30,0
Noirv2.chr1 12616253 . A C 170.0 . DP=65;VDB=0.380974;SGB=5.38303;RPB=0.784932;MQB=1;MQSB=1;BQB=0.501093;MQ0F=0;ICB=0.3;HOB=0.125;AC=1;AN=4;DP4=27,26,3,7;MQ=60;ANN=C	splice_region_variant&intron_variant	LOW	Gene_Vitvi01g01028.t01	Gene_Vitvi01g01028.t01	transcript	Vitvi01g01028.t01	Coding	1\2	c.563-7T>G						WARNING_TRANSCRIPT_MULTIPLE_STOP_CODONS,C	downstream_gene_variant	MODIFIER	Gene_Vitvi01g01027.t01	Gene_Vitvi01g01027.t01	transcript	Vitvi01g01027.t01	Coding		c.*2336A>C					2168	GT:PL:DP:AD 0\2:0,108,255:36:36,0 0\2:204,0,255:27:17,10
Noirv2.chr1 12616800 . A G 483.0 . DP=61;VDB=0.447543;SGB=-1.35075;MQSB=1;MQ0F=0;AC=4;AN=4;DP4=0,0,21,30;MQ=60;ANN=G	synonymous_variant	LOW	Gene_Vitvi01g01028.t01	Gene_Vitvi01g01028.t01	transcript	Vitvi01g01028.t01	Coding	1\2	c.141T>C	p.Leu47Leu	576\2060	141\2373	47\256		WARNING_TRANSCRIPT_MULTIPLE_STOP_CODONS,G	downstream_gene_variant	MODIFIER	Gene_Vitvi01g01027.t01	Gene_Vitvi01g01027.t01	transcript	Vitvi01g01027.t01	Coding		c.*2883A>G					2715	GT:PL:DP:AD 1\2:255,99,0:33:0,33 1\2:255,54,0:18:0,18
Noirv2.chr1 12616872 . G A 160.0 . DP=64;VDB=0.779918;SGB=4.69269;RPB=0.379842;MQB=1;MQSB=1;BQB=0.996451;MQ0F=0;ICB=0.3;HOB=0.125;AC=1;AN=4;DP4=18,32,4,5;MQ=60;ANN=A	synonymous_variant	LOW	Gene_Vitvi01g01028.t01	Gene_Vitvi01g01028.t01	transcript	Vitvi01g01028.t01	Coding	1\2	c.69C>T	p.Pro23Pro	504\2060	69\2373	23\256		WARNING_TRANSCRIPT_MULTIPLE_STOP_CODONS,A	downstream_gene_variant	MODIFIER	Gene_Vitvi01g01027.t01	Gene_Vitvi01g01027.t01	transcript	Vitvi01g01027.t01	Coding		c.*2955G>A					2787	GT:PL:DP:AD 0\2:0,114,255:38:38,0 0\2:194,0,240:21:12,9
Noirv2.chr1 12617161 . A T 110.0 . DP=49;VDB=0.298692;SGB=3.31571;RPB=0.922713;MQB=1;MQSB=1;BQB=0.551502;MQ0F=0;ICB=0.3;HOB=0.125;AC=1;AN=4;DP4=25,12,2,5;MQ=60;ANN=T	5_prime_UTR_premature_start_codon_gain_variant	LOW	Gene_Vitvi01g01028.t01	Gene_Vitvi01g01028.t01	transcript	Vitvi01g01028.t01	Coding	1\2	c.-221T>A						WARNING_TRANSCRIPT_MULTIPLE_STOP_CODONS,T	5_prime_UTR_variant	MODIFIER	Gene_Vitvi01g01028.t01	Gene_Vitvi01g01028.t01	transcript	Vitvi01g01028.t01	Coding	1\2	c.-221T>A					221	WARNING_TRANSCRIPT_MULTIPLE_STOP_CODONS,T	downstream_gene_variant	MODIFIER	Gene_Vitvi01g01027.t01	Gene_Vitvi01g01027.t01	transcript	Vitvi01g01027.t01	Coding		c.*3244A>T					3076	GT:PL:DP:AD 0\2:0,87,255:29:29,0 0\2:144,0,166:15:8,7
Noirv2.chr1 12617169 . C A 483.0 . DP=50;VDB=0.787556;SGB=-1.34187;MQSB=1;MQ0F=0;AC=4;AN=4;DP4=0,0,26,19;MQ=60;ANN=A	5_prime_UTR_premature_start_codon_gain_variant	LOW	Gene_Vitvi01g01028.t01	Gene_Vitvi01g01028.t01	transcript	Vitvi01g01028.t01	Coding	1\2	c.-229G>T						WARNING_TRANSCRIPT_MULTIPLE_STOP_CODONS,A	5_prime_UTR_variant	MODIFIER	Gene_Vitvi01g01028.t01	Gene_Vitvi01g01028.t01	transcript	Vitvi01g01028.t01	Coding	1\2	c.-229G>T					229	WARNING_TRANSCRIPT_MULTIPLE_STOP_CODONS,A	downstream_gene_variant	MODIFIER	Gene_Vitvi01g01027.t01	Gene_Vitvi01g01027.t01	transcript	Vitvi01g01027.t01	Coding		c.*3252C>A					3084	GT:PL:DP:AD 1\2:255,87,0:29:0,29 1\2:255,48,0:16:0,16
Noirv2.chr1 12634256 . G T 202.0 . DP=56;VDB=0.79373;SGB=8.15014;RPB=0.143596;MQB=1;MQSB=1;BQB=0.856305;MQ0F=0;ICB=0.3;HOB=0.125;AC=1;AN=4;DP4=19,19,9,5;MQ=60;ANN=T	5_prime_UTR_premature_start_codon_gain_variant	LOW	Gene_Vitvi01g01029.t01	Gene_Vitvi01g01029.t01	transcript	Vitvi01g01029.t01	Coding	2\2	c.-102G>T						WARNING_TRANSCRIPT_MULTIPLE_STOP_CODONS,T	5_prime_UTR_variant	MODIFIER	Gene_Vitvi01g01029.t01	Gene_Vitvi01g01029.t01	transcript	Vitvi01g01029.t01	Coding	2\2	c.-102G>T					102	WARNING_TRANSCRIPT_MULTIPLE_STOP_CODONS,T	non_coding_exon_variant	MODIFIER	Gene_Vitvi01g01029.r01	Gene_Vitvi01g01029.r01	transcript	Vitvi01g01029.r01	Noncoding	2\2	n.406G>T						,T	non_coding_exon_variant	MODIFIER	Gene_Vitvi01g01029.r02	Gene_Vitvi01g01029.r02
Noirv2.chr1 12634378 . C G 189.0 . DP=63;VDB=0.0547275;SGB=6.07412;RPB=0.0691279;MQB=1;MQSB=1;BQB=0.995448;MQ0F=0;ICB=0.3;HOB=0.125;AC=1;AN=4;DP4=23,26,5,6;MQ=60;ANN=G	splice_region_variant&intron_variant	LOW	Gene_Vitvi01g01029.t01	Gene_Vitvi01g01029.t01	transcript	Vitvi01g01029.t01	Coding	2\2	c.13+8C>G						WARNING_TRANSCRIPT_MULTIPLE_STOP_CODONS,G	splice_region_variant&intron_variant	LOW	Gene_Vitvi01g01029.r01	Gene_Vitvi01g01029.r01	transcript	Vitvi01g01029.r01	Noncoding	2\2	n.520+8C>G						,G	splice_region_variant&intron_variant	LOW	Gene_Vitvi01g01029.r02	Gene_Vitvi01g01029.r02	transcript	Vitvi01g01029.r02	Noncoding	2\2	n.520+8C>G						GT:PL:DP:AD 0\2:0,114,255:38:38,0 0\2:223,0,235:22:11,11
Noirv2.chr1 12642263 . C G 483.0 . DP=71;VDB=0.977335;SGB=-1.38606;MQSB=1;MQ0F=0;AC=4;AN=4;DP4=0,0,36,32;MQ=60;ANN=G	splice_region_variant&intron_variant	LOW	Gene_Vitvi01g01029.t01	Gene_Vitvi01g01029.t01	transcript	Vitvi01g01029.t01	Coding	3\2	c.78-3C>G						WARNING_TRANSCRIPT_MULTIPLE_STOP_CODONS,G	splice_region_variant&intron_variant	LOW	Gene_Vitvi01g01029.r01	Gene_Vitvi01g01029.r01	transcript	Vitvi01g01029.r01	Noncoding	3\2	n.586-6C>G						,G	splice_region_variant&intron_variant	LOW	Gene_Vitvi01g01029.r02	Gene_Vitvi01g01029.r02	transcript	Vitvi01g01029.r02	Noncoding	3\2	n.586-3C>G						GT:PL:DP:AD 1\2:255,114,0:38:0,38 1\2:255,90,0:30:0,30
Noirv2.chr1 12645282 . G A 221.0 . DP=66;VDB=0.211994;SGB=10.2282;RPB=0.922155;MQB=1;MQSB=1;BQB=0.294362;MQ0F=0;ICB=0.3;HOB=0.125;AC=1;AN=4;DP4=31,15,11,6;MQ=60;ANN=A	splice_region_variant&intron_variant	LOW	Gene_Vitvi01g01029.t01	Gene_Vitvi01g01029.t01	transcript	Vitvi01g01029.t01	Coding	5\2	c.203+6G>A						WARNING_TRANSCRIPT_MULTIPLE_STOP_CODONS,A	splice_region_variant&intron_variant	LOW	Gene_Vitvi01g01029.r01	Gene_Vitvi01g01029.r01	transcript	Vitvi01g01029.r01	Noncoding	5\2	n.708+6G>A						,A	splice_region_variant&intron_variant	LOW	Gene_Vitvi01g01029.r02	Gene_Vitvi01g01029.r02	transcript	Vitvi01g01029.r02	Noncoding	5\2	n.711+6G>A						GT:PL:DP:AD 0\2:255,0,255:41:24,17 0\2:0,66,255:22:22,0
Noirv2.chr1 12654553 . A G 162.0 . DP=51;VDB=0.793292;SGB=5.38303;RPB=0.283567;MQB=1;MQSB=1;BQB=0.342639;MQ0F=0;ICB=0.3;HOB=0.125;AC=1;AN=4;DP4=23,16,6,4;MQ=60;ANN=G	synonymous_variant	LOW	Gene_Vitvi01g01030.t01	Gene_Vitvi01g01030.t01	transcript	Vitvi01g01030.t01	Coding	2\2	c.105T>C	p.Asp35Asp	219\2316	105\240	35\245		WARNING_TRANSCRIPT_MULTIPLE_STOP_CODONS GT:PL:DP:AD 0\2:0,93,255:31:31,0 0\2:196,0,178:18:8,10
Noirv2.chr1 12654622 . C T 221.0 . DP=57;VDB=0.293624;SGB=13.0002;RPB=0.65047;MQB=1;MQSB=1;BQB=0.929678;MQ0F=0;ICB=0.3;HOB=0.125;AC=1;AN=4;DP4=14,18,5,16;MQ=60;ANN=T	synonymous_variant	LOW	Gene_Vitvi01g01030.t01	Gene_Vitvi01g01030.t01	transcript	Vitvi01g01030.t01	Coding	2\2	c.36G>A	p.Leu12Leu	150\2316	36\240	12\245		WARNING_TRANSCRIPT_MULTIPLE_STOP_CODONS GT:PL:DP:AD 0\2:255,0,204:31:10,21 0\2:0,66,255:22:22,0
Noirv2.chr1 12677723 . A C 221.0 . DP=68;VDB=0.456713;SGB=9.53539;RPB=0.961091;MQB=1;MQSB=1;BQB=0.306401;MQ0F=0;ICB=0.3;HOB=0.125;AC=1;AN=4;DP4=25,24,8,8;MQ=60;ANN=C	synonymous_variant	LOW	Gene_Vitvi01g01031.t02	Gene_Vitvi01g01031.t02	transcript	Vitvi01g01031.t02	Coding	2\2	c.1332T>G	p.Leu444Leu	1891\2288	1332\2337	444\244		WARNING_TRANSCRIPT_MULTIPLE_STOP_CODONS,C	synonymous_variant	LOW	Gene_Vitvi01g01031.t01	Gene_Vitvi01g01031.t01	transcript	Vitvi01g01031.t01	Coding	2\2	c.1251T>G	p.Leu417Leu	1811\2208	1251\2256	417\217		WARNING_TRANSCRIPT_MULTIPLE_STOP_CODONS GT:PL:DP:AD 0\2:0,117,255:39:39,0 0\2:255,0,206:26:10,16
Noirv2.chr1 12677729 . G A 483.0 . DP=64;VDB=0.236922;SGB=-1.38469;MQSB=1;MQ0F=0;AC=4;AN=4;DP4=0,0,30,30;MQ=60;ANN=A	synonymous_variant	LOW	Gene_Vitvi01g01031.t02	Gene_Vitvi01g01031.t02	transcript	Vitvi01g01031.t02	Coding	2\2	c.1326C>T	p.Leu442Leu	1885\2288	1326\2337	442\244		WARNING_TRANSCRIPT_MULTIPLE_STOP_CODONS,A	synonymous_variant	LOW	Gene_Vitvi01g01031.t01	Gene_Vitvi01g01031.t01	transcript	Vitvi01g01031.t01	Coding	2\2	c.1245C>T	p.Leu415Leu	1805\2208	1245\2256	415\217		WARNING_TRANSCRIPT_MULTIPLE_STOP_CODONS GT:PL:DP:AD 1\2:255,105,0:35:0,35 1\2:255,75,0:25:0,25
Noirv2.chr1 12677750 . A G 221.0 . DP=67;VDB=0.590911;SGB=14.3863;RPB=0.960059;MQB=1;MQSB=1;BQB=0.529421;MQ0F=0;ICB=0.3;HOB=0.125;AC=1;AN=4;DP4=19,21,13,10;MQ=60;ANN=G	synonymous_variant	LOW	Gene_Vitvi01g01031.t02	Gene_Vitvi01g01031.t02	transcript	Vitvi01g01031.t02	Coding	2\2	c.1305T>C	p.Phe435Phe	1864\2288	1305\2337	435\244		WARNING_TRANSCRIPT_MULTIPLE_STOP_CODONS,G	synonymous_variant	LOW	Gene_Vitvi01g01031.t01	Gene_Vitvi01g01031.t01	transcript	Vitvi01g01031.t01	Coding	2\2	c.1224T>C	p.Phe408Phe	1784\2208	1224\2256	408\217		WARNING_TRANSCRIPT_MULTIPLE_STOP_CODONS GT:PL:DP:AD 0\2:255,0,246:37:14,23 0\2:0,78,255:26:26,0
Noirv2.chr1 12681599 . C G 483.0 . DP=56;VDB=0.450834;SGB=-1.25114;MQSB=1;MQ0F=0;AC=4;AN=4;DP4=0,0,20,31;MQ=60;ANN=G	synonymous_variant	LOW	Gene_Vitvi01g01031.t02	Gene_Vitvi01g01031.t02	transcript	Vitvi01g01031.t02	Coding	1\2	c.120G>C	p.Leu40Leu	679\2288	120\2337	40\244		WARNING_TRANSCRIPT_MULTIPLE_STOP_CODONS,G	synonymous_variant	LOW	Gene_Vitvi01g01031.t01	Gene_Vitvi01g01031.t01	transcript	Vitvi01g01031.t01	Coding	1\2	c.120G>C	p.Leu40Leu	680\2208	120\2256	40\217		WARNING_TRANSCRIPT_MULTIPLE_STOP_CODONS,G	upstream_gene_variant	MODIFIER	Gene_Vitvi01g01032.t01	Gene_Vitvi01g01032.t01	transcript	Vitvi01g01032.t01	Coding		c.-1847C>G					1804	WARNING_TRANSCRIPT_INCOMPLETE GT:PL:DP:AD 1\2:255,105,0:35:0,35 1\2:255,48,0:16:0,16
Noirv2.chr1 12681668 . A T 221.0 . DP=66;VDB=0.1368;SGB=13.6932;RPB=0.455554;MQB=1;MQSB=1;BQB=0.993114;MQ0F=0;ICB=0.3;HOB=0.125;AC=1;AN=4;DP4=15,22,8,14;MQ=60;ANN=T	synonymous_variant	LOW	Gene_Vitvi01g01031.t02	Gene_Vitvi01g01031.t02	transcript	Vitvi01g01031.t02	Coding	1\2	c.51T>A	p.Thr17Thr	610\2288	51\2337	17\244		WARNING_TRANSCRIPT_MULTIPLE_STOP_CODONS,T	synonymous_variant	LOW	Gene_Vitvi01g01031.t01	Gene_Vitvi01g01031.t01	transcript	Vitvi01g01031.t01	Coding	1\2	c.51T>A	p.Thr17Thr	611\2208	51\2256	17\217		WARNING_TRANSCRIPT_MULTIPLE_STOP_CODONS,T	upstream_gene_variant	MODIFIER	Gene_Vitvi01g01032.t01	Gene_Vitvi01g01032.t01	transcript	Vitvi01g01032.t01	Coding		c.-1778A>T					1735	WARNING_TRANSCRIPT_INCOMPLETE GT:PL:DP:AD 0\2:255,0,250:37:15,22 0\2:0,66,255:22:22,0
Noirv2.chr1 12681927 . G A 111.0 . DP=44;VDB=0.824688;SGB=2.63044;RPB=0.995276;MQB=1;MQSB=1;BQB=0.174566;MQ0F=0;ICB=0.3;HOB=0.125;AC=1;AN=4;DP4=22,11,4,2;MQ=60;ANN=A	5_prime_UTR_premature_start_codon_gain_variant	LOW	Gene_Vitvi01g01031.t02	Gene_Vitvi01g01031.t02	transcript	Vitvi01g01031.t02	Coding	1\2	c.-209C>T						WARNING_TRANSCRIPT_MULTIPLE_STOP_CODONS,A	5_prime_UTR_premature_start_codon_gain_variant	LOW	Gene_Vitvi01g01031.t01	Gene_Vitvi01g01031.t01	transcript	Vitvi01g01031.t01	Coding	1\2	c.-209C>T						WARNING_TRANSCRIPT_MULTIPLE_STOP_CODONS,A	5_prime_UTR_variant	MODIFIER	Gene_Vitvi01g01031.t02	Gene_Vitvi01g01031.t02	transcript	Vitvi01g01031.t02	Coding	1\2	c.-209C>T					209	WARNING_TRANSCRIPT_MULTIPLE_STOP_CODONS,A	5_prime_UTR_variant	MODIFIER	Gene_Vitvi01g01031.t01	Gene_Vitvi01g01031.t01
Noirv2.chr1 12682095 . C T 140.0 . DP=52;VDB=0.162966;SGB=5.38303;RPB=0.976987;MQB=1;MQSB=1;BQB=0.696542;MQ0F=0;ICB=0.3;HOB=0.125;AC=1;AN=4;DP4=19,19,2,8;MQ=60;ANN=T	5_prime_UTR_premature_start_codon_gain_variant	LOW	Gene_Vitvi01g01031.t02	Gene_Vitvi01g01031.t02	transcript	Vitvi01g01031.t02	Coding	1\2	c.-377G>A						WARNING_TRANSCRIPT_MULTIPLE_STOP_CODONS,T	5_prime_UTR_premature_start_codon_gain_variant	LOW	Gene_Vitvi01g01031.t01	Gene_Vitvi01g01031.t01	transcript	Vitvi01g01031.t01	Coding	1\2	c.-377G>A						WARNING_TRANSCRIPT_MULTIPLE_STOP_CODONS,T	5_prime_UTR_variant	MODIFIER	Gene_Vitvi01g01031.t02	Gene_Vitvi01g01031.t02	transcript	Vitvi01g01031.t02	Coding	1\2	c.-377G>A					377	WARNING_TRANSCRIPT_MULTIPLE_STOP_CODONS,T	5_prime_UTR_variant	MODIFIER	Gene_Vitvi01g01031.t01	Gene_Vitvi01g01031.t01
Noirv2.chr1 12682237 . A C 419.0 . DP=55;VDB=0.607076;SGB=-0.641231;RPB=0.671082;MQB=1;MQSB=1;BQB=0.601883;MQ0F=0;ICB=0.3;HOB=0.125;AC=3;AN=4;DP4=4,7,16,24;MQ=60;ANN=C	5_prime_UTR_premature_start_codon_gain_variant	LOW	Gene_Vitvi01g01031.t02	Gene_Vitvi01g01031.t02	transcript	Vitvi01g01031.t02	Coding	1\2	c.-519T>G						WARNING_TRANSCRIPT_MULTIPLE_STOP_CODONS,C	5_prime_UTR_premature_start_codon_gain_variant	LOW	Gene_Vitvi01g01031.t01	Gene_Vitvi01g01031.t01	transcript	Vitvi01g01031.t01	Coding	1\2	c.-519T>G						WARNING_TRANSCRIPT_MULTIPLE_STOP_CODONS,C	5_prime_UTR_variant	MODIFIER	Gene_Vitvi01g01031.t02	Gene_Vitvi01g01031.t02	transcript	Vitvi01g01031.t02	Coding	1\2	c.-519T>G					519	WARNING_TRANSCRIPT_MULTIPLE_STOP_CODONS,C	5_prime_UTR_variant	MODIFIER	Gene_Vitvi01g01031.t01	Gene_Vitvi01g01031.t01
Noirv2.chr1 12754781 . A G 221.0 . DP=76;VDB=0.163521;SGB=10.2282;RPB=0.0187281;MQB=1;MQSB=1;BQB=0.64018;MQ0F=0;ICB=0.3;HOB=0.125;AC=1;AN=4;DP4=34,23,11,6;MQ=60;ANN=G	synonymous_variant	LOW	Gene_Vitvi01g01033.t01	Gene_Vitvi01g01033.t01	transcript	Vitvi01g01033.t01	Coding	6\2	c.880T>C	p.Leu294Leu	881\2447	880\220	294\205		WARNING_TRANSCRIPT_MULTIPLE_STOP_CODONS GT:PL:DP:AD 0\2:0,141,255:47:47,0 0\2:255,0,203:27:10,17
Noirv2.chr1 12754893 . A G 476.0 . DP=59;VDB=0.297328;SGB=-13.3152;RPB=0.993226;MQB=1;MQSB=1;BQB=0.999638;MQ0F=0;ICB=0.3;HOB=0.125;AC=3;AN=4;DP4=11,7,14,23;MQ=60;ANN=G	synonymous_variant	LOW	Gene_Vitvi01g01033.t01	Gene_Vitvi01g01033.t01	transcript	Vitvi01g01033.t01	Coding	6\2	c.768T>C	p.His256His	769\2447	768\220	256\205		WARNING_TRANSCRIPT_MULTIPLE_STOP_CODONS GT:PL:DP:AD 0\2:255,0,255:34:18,16 1\2:255,63,0:21:0,21
Noirv2.chr1 12757970 . C T 483.0 . DP=62;VDB=0.0325894;SGB=-1.38606;MQSB=1;MQ0F=0;AC=4;AN=4;DP4=0,0,25,30;MQ=60;ANN=T	splice_region_variant&intron_variant	LOW	Gene_Vitvi01g01033.t01	Gene_Vitvi01g01033.t01	transcript	Vitvi01g01033.t01	Coding	1\2	c.252-4G>A						WARNING_TRANSCRIPT_MULTIPLE_STOP_CODONS GT:PL:DP:AD 1\2:255,81,0:27:0,27 1\2:255,84,0:28:0,28
Noirv2.chr1 12757974 . T A 483.0 . DP=59;VDB=0.0315606;SGB=-1.38606;MQSB=1;MQ0F=0;AC=4;AN=4;DP4=0,0,25,30;MQ=60;ANN=A	splice_region_variant&intron_variant	LOW	Gene_Vitvi01g01033.t01	Gene_Vitvi01g01033.t01	transcript	Vitvi01g01033.t01	Coding	1\2	c.252-8A>T						WARNING_TRANSCRIPT_MULTIPLE_STOP_CODONS GT:PL:DP:AD 1\2:255,81,0:27:0,27 1\2:255,84,0:28:0,28
Noirv2.chr1 12758795 . A G 216.0 . DP=65;VDB=0.610966;SGB=8.84268;RPB=0.999156;MQB=1;MQSB=1;BQB=0.99946;MQ0F=0;ICB=0.3;HOB=0.125;AC=1;AN=4;DP4=24,23,10,5;MQ=60;ANN=G	splice_region_variant&intron_variant	LOW	Gene_Vitvi01g01033.t01	Gene_Vitvi01g01033.t01	transcript	Vitvi01g01033.t01	Coding	1\2	c.251+8T>C						WARNING_TRANSCRIPT_MULTIPLE_STOP_CODONS GT:PL:DP:AD 0\2:0,99,255:33:33,0 0\2:250,0,255:29:14,15
Noirv2.chr1 12758826 . T C 466.0 . DP=54;VDB=0.0749122;SGB=-12.7015;RPB=0.320772;MQB=1;MQSB=1;BQB=0.00162227;MQ0F=0;ICB=0.3;HOB=0.125;AC=3;AN=4;DP4=8,5,18,17;MQ=60;ANN=C	synonymous_variant	LOW	Gene_Vitvi01g01033.t01	Gene_Vitvi01g01033.t01	transcript	Vitvi01g01033.t01	Coding	1\2	c.228A>G	p.Leu76Leu	229\2447	228\220	76\205		WARNING_TRANSCRIPT_MULTIPLE_STOP_CODONS GT:PL:DP:AD 1\2:255,69,0:23:0,23 0\2:245,0,208:25:13,12
Noirv2.chr1 12782481 . T A 192.0 . DP=53;VDB=0.118547;SGB=8.84268;RPB=0.0234701;MQB=1;MQSB=1;BQB=0.679468;MQ0F=0;ICB=0.3;HOB=0.125;AC=1;AN=4;DP4=10,18,4,11;MQ=60;ANN=A	synonymous_variant	LOW	Gene_Vitvi01g01034.t01	Gene_Vitvi01g01034.t01	transcript	Vitvi01g01034.t01	Coding	2\2	c.57T>A	p.Gly19Gly	203\2295	57\2640	19\245		WARNING_TRANSCRIPT_MULTIPLE_STOP_CODONS,A	synonymous_variant	LOW	Gene_Vitvi01g01034.t02	Gene_Vitvi01g01034.t02	transcript	Vitvi01g01034.t02	Coding	2\2	c.57T>A	p.Gly19Gly	202\2207	57\2553	19\216		WARNING_TRANSCRIPT_MULTIPLE_STOP_CODONS,A	non_coding_exon_variant	MODIFIER	Gene_Vitvi01g01034.r01	Gene_Vitvi01g01034.r01	transcript	Vitvi01g01034.r01	Noncoding	2\2	n.203T>A						,A	non_coding_exon_variant	MODIFIER	Gene_Vitvi01g01034.r02	Gene_Vitvi01g01034.r02
Noirv2.chr1 12782490 . C A 483.0 . DP=52;VDB=0.658481;SGB=-1.34953;MQSB=1;MQ0F=0;AC=4;AN=4;DP4=0,0,15,29;MQ=60;ANN=A	synonymous_variant	LOW	Gene_Vitvi01g01034.t01	Gene_Vitvi01g01034.t01	transcript	Vitvi01g01034.t01	Coding	2\2	c.66C>A	p.Gly22Gly	212\2295	66\2640	22\245		WARNING_TRANSCRIPT_MULTIPLE_STOP_CODONS,A	synonymous_variant	LOW	Gene_Vitvi01g01034.t02	Gene_Vitvi01g01034.t02	transcript	Vitvi01g01034.t02	Coding	2\2	c.66C>A	p.Gly22Gly	211\2207	66\2553	22\216		WARNING_TRANSCRIPT_MULTIPLE_STOP_CODONS,A	non_coding_exon_variant	MODIFIER	Gene_Vitvi01g01034.r01	Gene_Vitvi01g01034.r01	transcript	Vitvi01g01034.r01	Noncoding	2\2	n.212C>A						,A	non_coding_exon_variant	MODIFIER	Gene_Vitvi01g01034.r02	Gene_Vitvi01g01034.r02
Noirv2.chr1 12782766 . T C 133.0 . DP=52;VDB=0.322974;SGB=4.00342;RPB=0.573233;MQB=1;MQSB=1;BQB=0.606013;MQ0F=0;ICB=0.3;HOB=0.125;AC=1;AN=4;DP4=26,15,3,5;MQ=60;ANN=C	synonymous_variant	LOW	Gene_Vitvi01g01034.t01	Gene_Vitvi01g01034.t01	transcript	Vitvi01g01034.t01	Coding	2\2	c.342T>C	p.Asp114Asp	488\2295	342\2640	114\245		WARNING_TRANSCRIPT_MULTIPLE_STOP_CODONS,C	synonymous_variant	LOW	Gene_Vitvi01g01034.t02	Gene_Vitvi01g01034.t02	transcript	Vitvi01g01034.t02	Coding	2\2	c.342T>C	p.Asp114Asp	487\2207	342\2553	114\216		WARNING_TRANSCRIPT_MULTIPLE_STOP_CODONS,C	non_coding_exon_variant	MODIFIER	Gene_Vitvi01g01034.r01	Gene_Vitvi01g01034.r01	transcript	Vitvi01g01034.r01	Noncoding	2\2	n.488T>C						,C	non_coding_exon_variant	MODIFIER	Gene_Vitvi01g01034.r02	Gene_Vitvi01g01034.r02
Noirv2.chr1 12782946 . C T 206.0 . DP=60;VDB=0.982719;SGB=6.76576;RPB=0.999263;MQB=0.99339;MQSB=0.966998;BQB=0.918365;MQ0F=0;ICB=0.3;HOB=0.125;AC=1;AN=4;DP4=19,27,6,6;MQ=59;ANN=T	synonymous_variant	LOW	Gene_Vitvi01g01034.t01	Gene_Vitvi01g01034.t01	transcript	Vitvi01g01034.t01	Coding	2\2	c.522C>T	p.Arg174Arg	668\2295	522\2640	174\245		WARNING_TRANSCRIPT_MULTIPLE_STOP_CODONS,T	synonymous_variant	LOW	Gene_Vitvi01g01034.t02	Gene_Vitvi01g01034.t02	transcript	Vitvi01g01034.t02	Coding	2\2	c.522C>T	p.Arg174Arg	667\2207	522\2553	174\216		WARNING_TRANSCRIPT_MULTIPLE_STOP_CODONS,T	non_coding_exon_variant	MODIFIER	Gene_Vitvi01g01034.r01	Gene_Vitvi01g01034.r01	transcript	Vitvi01g01034.r01	Noncoding	2\2	n.668C>T						,T	non_coding_exon_variant	MODIFIER	Gene_Vitvi01g01034.r02	Gene_Vitvi01g01034.r02
Noirv2.chr1 12784240 . G T 203.0 . DP=67;VDB=0.822343;SGB=8.84268;RPB=0.780592;MQB=1;MQSB=1;BQB=0.375285;MQ0F=0;ICB=0.3;HOB=0.125;AC=1;AN=4;DP4=31,20,8,7;MQ=60;ANN=T	synonymous_variant	LOW	Gene_Vitvi01g01034.t01	Gene_Vitvi01g01034.t01	transcript	Vitvi01g01034.t01	Coding	3\2	c.816G>T	p.Leu272Leu	962\2295	816\2640	272\245		WARNING_TRANSCRIPT_MULTIPLE_STOP_CODONS,T	synonymous_variant	LOW	Gene_Vitvi01g01034.t02	Gene_Vitvi01g01034.t02	transcript	Vitvi01g01034.t02	Coding	4\2	c.729G>T	p.Leu243Leu	874\2207	729\2553	243\216		WARNING_TRANSCRIPT_MULTIPLE_STOP_CODONS,T	non_coding_exon_variant	MODIFIER	Gene_Vitvi01g01034.r01	Gene_Vitvi01g01034.r01	transcript	Vitvi01g01034.r01	Noncoding	3\2	n.963G>T						,T	non_coding_exon_variant	MODIFIER	Gene_Vitvi01g01034.r02	Gene_Vitvi01g01034.r02
Noirv2.chr1 12790239 . C A 483.0 . DP=66;VDB=0.991711;SGB=-1.38614;MQSB=1;MQ0F=0;AC=4;AN=4;DP4=0,0,42,20;MQ=60;ANN=A	synonymous_variant	LOW	Gene_Vitvi01g02136.t01	Gene_Vitvi01g02136.t01	transcript	Vitvi01g02136.t01	Coding	9\2	c.801G>T	p.Gly267Gly	801\297	801\222	267\273		,A	downstream_gene_variant	MODIFIER	Gene_Vitvi01g01034.t01	Gene_Vitvi01g01034.t01	transcript	Vitvi01g01034.t01	Coding		c.*4500C>A					3806	WARNING_TRANSCRIPT_MULTIPLE_STOP_CODONS,A	downstream_gene_variant	MODIFIER	Gene_Vitvi01g01034.r01	Gene_Vitvi01g01034.r01	transcript	Vitvi01g01034.r01	Noncoding		n.*2037C>A					2037	,A	downstream_gene_variant	MODIFIER	Gene_Vitvi01g01034.r02	Gene_Vitvi01g01034.r02
Noirv2.chr1 12790266 . G A 221.0 . DP=62;VDB=0.146644;SGB=9.53539;RPB=0.715845;MQB=1;MQSB=1;BQB=0.679816;MQ0F=0;ICB=0.3;HOB=0.125;AC=1;AN=4;DP4=27,15,10,6;MQ=60;ANN=A	synonymous_variant	LOW	Gene_Vitvi01g02136.t01	Gene_Vitvi01g02136.t01	transcript	Vitvi01g02136.t01	Coding	9\2	c.774C>T	p.Gly258Gly	774\297	774\222	258\273		,A	downstream_gene_variant	MODIFIER	Gene_Vitvi01g01034.t01	Gene_Vitvi01g01034.t01	transcript	Vitvi01g01034.t01	Coding		c.*4527G>A					3833	WARNING_TRANSCRIPT_MULTIPLE_STOP_CODONS,A	downstream_gene_variant	MODIFIER	Gene_Vitvi01g01034.r01	Gene_Vitvi01g01034.r01	transcript	Vitvi01g01034.r01	Noncoding		n.*2064G>A					2064	,A	downstream_gene_variant	MODIFIER	Gene_Vitvi01g01034.r02	Gene_Vitvi01g01034.r02
Noirv2.chr1 12790296 . G A 483.0 . DP=60;VDB=0.146934;SGB=-1.3848;MQSB=1;MQ0F=0;AC=4;AN=4;DP4=0,0,34,22;MQ=60;ANN=A	synonymous_variant	LOW	Gene_Vitvi01g02136.t01	Gene_Vitvi01g02136.t01	transcript	Vitvi01g02136.t01	Coding	9\2	c.744C>T	p.Ser248Ser	744\297	744\222	248\273		,A	downstream_gene_variant	MODIFIER	Gene_Vitvi01g01034.t01	Gene_Vitvi01g01034.t01	transcript	Vitvi01g01034.t01	Coding		c.*4557G>A					3863	WARNING_TRANSCRIPT_MULTIPLE_STOP_CODONS,A	downstream_gene_variant	MODIFIER	Gene_Vitvi01g01034.r01	Gene_Vitvi01g01034.r01	transcript	Vitvi01g01034.r01	Noncoding		n.*2094G>A					2094	,A	downstream_gene_variant	MODIFIER	Gene_Vitvi01g01034.r02	Gene_Vitvi01g01034.r02
Noirv2.chr1 12790305 . G A 476.0 . DP=65;VDB=0.420273;SGB=-1.1321;RPB=0.991716;MQB=1;MQSB=1;BQB=0.989194;MQ0F=0;ICB=0.3;HOB=0.125;AC=3;AN=4;DP4=4,7,32,19;MQ=60;ANN=A	synonymous_variant	LOW	Gene_Vitvi01g02136.t01	Gene_Vitvi01g02136.t01	transcript	Vitvi01g02136.t01	Coding	9\2	c.735C>T	p.Asn245Asn	735\297	735\222	245\273		,A	downstream_gene_variant	MODIFIER	Gene_Vitvi01g01034.t01	Gene_Vitvi01g01034.t01	transcript	Vitvi01g01034.t01	Coding		c.*4566G>A					3872	WARNING_TRANSCRIPT_MULTIPLE_STOP_CODONS,A	downstream_gene_variant	MODIFIER	Gene_Vitvi01g01034.r01	Gene_Vitvi01g01034.r01	transcript	Vitvi01g01034.r01	Noncoding		n.*2103G>A					2103	,A	downstream_gene_variant	MODIFIER	Gene_Vitvi01g01034.r02	Gene_Vitvi01g01034.r02
Noirv2.chr1 12790400 . G A 221.0 . DP=98;VDB=0.329522;SGB=15.7726;RPB=0.980553;MQB=0.97496;MQSB=0.93888;BQB=0.903538;MQ0F=0;ICB=0.3;HOB=0.125;AC=1;AN=4;DP4=33,32,13,12;MQ=59;ANN=A	splice_region_variant&intron_variant	LOW	Gene_Vitvi01g02136.t01	Gene_Vitvi01g02136.t01	transcript	Vitvi01g02136.t01	Coding	8\2	c.718+8C>T						,A	downstream_gene_variant	MODIFIER	Gene_Vitvi01g01034.t01	Gene_Vitvi01g01034.t01	transcript	Vitvi01g01034.t01	Coding		c.*4661G>A					3967	WARNING_TRANSCRIPT_MULTIPLE_STOP_CODONS,A	downstream_gene_variant	MODIFIER	Gene_Vitvi01g01034.r01	Gene_Vitvi01g01034.r01	transcript	Vitvi01g01034.r01	Noncoding		n.*2198G>A					2198	,A	downstream_gene_variant	MODIFIER	Gene_Vitvi01g01034.r02	Gene_Vitvi01g01034.r02
Noirv2.chr1 12790448 . T A 93.0 . DP=89;VDB=0.000321644;SGB=4.00342;RPB=0.689496;MQB=0.510475;MQSB=0.908659;BQB=0.17539;MQ0F=0;ICB=0.3;HOB=0.125;AC=1;AN=4;DP4=28,50,8,0;MQ=59;ANN=A	synonymous_variant	LOW	Gene_Vitvi01g02136.t01	Gene_Vitvi01g02136.t01	transcript	Vitvi01g02136.t01	Coding	8\2	c.678A>T	p.Arg226Arg	678\297	678\222	226\273		,A	downstream_gene_variant	MODIFIER	Gene_Vitvi01g01034.t01	Gene_Vitvi01g01034.t01	transcript	Vitvi01g01034.t01	Coding		c.*4709T>A					4015	WARNING_TRANSCRIPT_MULTIPLE_STOP_CODONS,A	downstream_gene_variant	MODIFIER	Gene_Vitvi01g01034.r01	Gene_Vitvi01g01034.r01	transcript	Vitvi01g01034.r01	Noncoding		n.*2246T>A					2246	,A	downstream_gene_variant	MODIFIER	Gene_Vitvi01g01034.r02	Gene_Vitvi01g01034.r02
Noirv2.chr1 12790451 . A C 93.0 . DP=87;VDB=0.000307845;SGB=4.00342;RPB=0.526323;MQB=0.512387;MQSB=0.90298;BQB=0.592217;MQ0F=0;ICB=0.3;HOB=0.125;AC=1;AN=4;DP4=26,48,8,0;MQ=59;ANN=C	synonymous_variant	LOW	Gene_Vitvi01g02136.t01	Gene_Vitvi01g02136.t01	transcript	Vitvi01g02136.t01	Coding	8\2	c.675T>G	p.Val225Val	675\297	675\222	225\273		,C	downstream_gene_variant	MODIFIER	Gene_Vitvi01g01034.t01	Gene_Vitvi01g01034.t01	transcript	Vitvi01g01034.t01	Coding		c.*4712A>C					4018	WARNING_TRANSCRIPT_MULTIPLE_STOP_CODONS,C	downstream_gene_variant	MODIFIER	Gene_Vitvi01g01034.r01	Gene_Vitvi01g01034.r01	transcript	Vitvi01g01034.r01	Noncoding		n.*2249A>C					2249	,C	downstream_gene_variant	MODIFIER	Gene_Vitvi01g01034.r02	Gene_Vitvi01g01034.r02
Noirv2.chr1 12790474 . G A 150.0 . DP=95;VDB=0.942857;SGB=8.15014;RPB=0.961425;MQB=0.106262;MQSB=0.594698;BQB=0.877382;MQ0F=0;ICB=0.3;HOB=0.125;AC=1;AN=4;DP4=27,50,13,1;MQ=58;ANN=A	splice_region_variant&intron_variant	LOW	Gene_Vitvi01g02136.t01	Gene_Vitvi01g02136.t01	transcript	Vitvi01g02136.t01	Coding	7\2	c.655-3C>T						,A	downstream_gene_variant	MODIFIER	Gene_Vitvi01g01034.t01	Gene_Vitvi01g01034.t01	transcript	Vitvi01g01034.t01	Coding		c.*4735G>A					4041	WARNING_TRANSCRIPT_MULTIPLE_STOP_CODONS,A	downstream_gene_variant	MODIFIER	Gene_Vitvi01g01034.r01	Gene_Vitvi01g01034.r01	transcript	Vitvi01g01034.r01	Noncoding		n.*2272G>A					2272	,A	downstream_gene_variant	MODIFIER	Gene_Vitvi01g01034.r02	Gene_Vitvi01g01034.r02
Noirv2.chr1 12791883 . T C 483.0 . DP=56;VDB=0.239726;SGB=-1.38462;MQSB=1;MQ0F=0;AC=4;AN=4;DP4=0,0,31,22;MQ=60;ANN=C	splice_region_variant&intron_variant	LOW	Gene_Vitvi01g02136.t01	Gene_Vitvi01g02136.t01	transcript	Vitvi01g02136.t01	Coding	5\2	c.556-4A>G						,C	downstream_gene_variant	MODIFIER	Gene_Vitvi01g01034.r01	Gene_Vitvi01g01034.r01	transcript	Vitvi01g01034.r01	Noncoding		n.*3681T>C					3681	,C	downstream_gene_variant	MODIFIER	Gene_Vitvi01g01034.r02	Gene_Vitvi01g01034.r02	transcript	Vitvi01g01034.r02	Noncoding		n.*3681T>C					3681	GT:PL:DP:AD 1\2:255,90,0:30:0,30 1\2:255,69,0:23:0,23
Noirv2.chr1 12791964 . G A 221.0 . DP=63;VDB=0.17229;SGB=8.15014;RPB=0.962583;MQB=1;MQSB=1;BQB=0.640265;MQ0F=0;ICB=0.3;HOB=0.125;AC=1;AN=4;DP4=32,13,6,8;MQ=60;ANN=A	splice_region_variant&intron_variant	LOW	Gene_Vitvi01g02136.t01	Gene_Vitvi01g02136.t01	transcript	Vitvi01g02136.t01	Coding	5\2	c.555+8C>T						,A	downstream_gene_variant	MODIFIER	Gene_Vitvi01g01034.r01	Gene_Vitvi01g01034.r01	transcript	Vitvi01g01034.r01	Noncoding		n.*3762G>A					3762	,A	downstream_gene_variant	MODIFIER	Gene_Vitvi01g01034.r02	Gene_Vitvi01g01034.r02	transcript	Vitvi01g01034.r02	Noncoding		n.*3762G>A					3762	GT:PL:DP:AD 0\2:0,99,255:33:33,0 0\2:255,0,252:26:12,14
Noirv2.chr1 12792373 . T C 455.0 . DP=69;VDB=0.172336;SGB=-0.805898;RPB=0.809681;MQB=1;MQSB=1;BQB=0.434225;MQ0F=0;ICB=0.3;HOB=0.125;AC=3;AN=4;DP4=11,4,20,29;MQ=60;ANN=C	splice_region_variant&intron_variant	LOW	Gene_Vitvi01g02136.t01	Gene_Vitvi01g02136.t01	transcript	Vitvi01g02136.t01	Coding	4\2	c.492+5A>G						,C	downstream_gene_variant	MODIFIER	Gene_Vitvi01g01034.r01	Gene_Vitvi01g01034.r01	transcript	Vitvi01g01034.r01	Noncoding		n.*4171T>C					4171	,C	downstream_gene_variant	MODIFIER	Gene_Vitvi01g01034.r02	Gene_Vitvi01g01034.r02	transcript	Vitvi01g01034.r02	Noncoding		n.*4171T>C					4171	GT:PL:DP:AD 1\2:255,108,0:36:0,36 0\2:234,0,255:28:15,13
Noirv2.chr1 12792374 . A T 190.0 . DP=71;VDB=0.437876;SGB=7.4578;RPB=0.433339;MQB=1;MQSB=1;BQB=0.410223;MQ0F=0;ICB=0.3;HOB=0.125;AC=1;AN=4;DP4=26,25,5,8;MQ=60;ANN=T	splice_region_variant&intron_variant	LOW	Gene_Vitvi01g02136.t01	Gene_Vitvi01g02136.t01	transcript	Vitvi01g02136.t01	Coding	4\2	c.492+4T>A						,T	downstream_gene_variant	MODIFIER	Gene_Vitvi01g01034.r01	Gene_Vitvi01g01034.r01	transcript	Vitvi01g01034.r01	Noncoding		n.*4172A>T					4172	,T	downstream_gene_variant	MODIFIER	Gene_Vitvi01g01034.r02	Gene_Vitvi01g01034.r02	transcript	Vitvi01g01034.r02	Noncoding		n.*4172A>T					4172	GT:PL:DP:AD 0\2:0,108,255:36:36,0 0\2:224,0,255:28:15,13
Noirv2.chr1 12792426 . C T 483.0 . DP=73;VDB=0.818036;SGB=-1.38623;MQSB=1;MQ0F=0;AC=4;AN=4;DP4=0,0,33,35;MQ=60;ANN=T	synonymous_variant	LOW	Gene_Vitvi01g02136.t01	Gene_Vitvi01g02136.t01	transcript	Vitvi01g02136.t01	Coding	4\2	c.444G>A	p.Lys148Lys	444\297	444\222	148\273		,T	downstream_gene_variant	MODIFIER	Gene_Vitvi01g01034.r01	Gene_Vitvi01g01034.r01	transcript	Vitvi01g01034.r01	Noncoding		n.*4224C>T					4224	,T	downstream_gene_variant	MODIFIER	Gene_Vitvi01g01034.r02	Gene_Vitvi01g01034.r02	transcript	Vitvi01g01034.r02	Noncoding		n.*4224C>T					4224	GT:PL:DP:AD 1\2:255,108,0:36:0,36 1\2:255,96,0:32:0,32
Noirv2.chr1 12792438 . A T 483.0 . DP=73;VDB=0.938632;SGB=-1.38627;MQSB=1;MQ0F=0;AC=4;AN=4;DP4=0,0,32,38;MQ=60;ANN=T	synonymous_variant	LOW	Gene_Vitvi01g02136.t01	Gene_Vitvi01g02136.t01	transcript	Vitvi01g02136.t01	Coding	4\2	c.432T>A	p.Ala144Ala	432\297	432\222	144\273		,T	downstream_gene_variant	MODIFIER	Gene_Vitvi01g01034.r01	Gene_Vitvi01g01034.r01	transcript	Vitvi01g01034.r01	Noncoding		n.*4236A>T					4236	,T	downstream_gene_variant	MODIFIER	Gene_Vitvi01g01034.r02	Gene_Vitvi01g01034.r02	transcript	Vitvi01g01034.r02	Noncoding		n.*4236A>T					4236	GT:PL:DP:AD 1\2:255,108,0:36:0,36 1\2:255,102,0:34:0,34
Noirv2.chr1 12792507 . G A 483.0 . DP=64;VDB=0.50373;SGB=-1.38589;MQSB=1;MQ0F=0;AC=4;AN=4;DP4=0,0,26,34;MQ=60;ANN=A	synonymous_variant	LOW	Gene_Vitvi01g02136.t01	Gene_Vitvi01g02136.t01	transcript	Vitvi01g02136.t01	Coding	4\2	c.363C>T	p.Ile121Ile	363\297	363\222	121\273		,A	upstream_gene_variant	MODIFIER	Gene_Vitvi01g02137.t01	Gene_Vitvi01g02137.t01	transcript	Vitvi01g02137.t01	Coding		c.-4937G>A					4937	,A	downstream_gene_variant	MODIFIER	Gene_Vitvi01g01034.r01	Gene_Vitvi01g01034.r01	transcript	Vitvi01g01034.r01	Noncoding		n.*4305G>A					4305	,A	downstream_gene_variant	MODIFIER	Gene_Vitvi01g01034.r02	Gene_Vitvi01g01034.r02
Noirv2.chr1 12794486 . T G 432.0 . DP=54;VDB=0.179847;SGB=1.87854;MQSB=1;MQ0F=0;AC=4;AN=4;DP4=0,0,29,20;MQ=60;ANN=G	synonymous_variant	LOW	Gene_Vitvi01g02136.t01	Gene_Vitvi01g02136.t01	transcript	Vitvi01g02136.t01	Coding	3\2	c.273A>C	p.Pro91Pro	273\297	273\222	91\273		,G	upstream_gene_variant	MODIFIER	Gene_Vitvi01g02137.t01	Gene_Vitvi01g02137.t01	transcript	Vitvi01g02137.t01	Coding		c.-2958T>G					2958	GT:PL:DP:AD 1\2:255,123,0:41:0,41 1\2:204,24,0:8:0,8
Noirv2.chr1 12795747 . T C 179.0 . DP=49;VDB=0.378827;SGB=6.76576;RPB=0.343787;MQB=1;MQSB=1;BQB=0.980086;MQ0F=0;ICB=0.3;HOB=0.125;AC=1;AN=4;DP4=15,14,7,5;MQ=60;ANN=C	synonymous_variant	LOW	Gene_Vitvi01g02136.t01	Gene_Vitvi01g02136.t01	transcript	Vitvi01g02136.t01	Coding	2\2	c.216A>G	p.Gln72Gln	216\297	216\222	72\273		,C	upstream_gene_variant	MODIFIER	Gene_Vitvi01g02137.t01	Gene_Vitvi01g02137.t01	transcript	Vitvi01g02137.t01	Coding		c.-1697T>C					1697	GT:PL:DP:AD 0\2:0,57,255:19:19,0 0\2:213,0,195:22:10,12
Noirv2.chr1 12796253 . A C 221.0 . DP=66;VDB=0.514891;SGB=12.3071;RPB=0.63516;MQB=1;MQSB=1;BQB=0.678534;MQ0F=0;ICB=0.3;HOB=0.125;AC=1;AN=4;DP4=16,23,11,9;MQ=60;ANN=C	splice_region_variant&intron_variant	LOW	Gene_Vitvi01g02136.t01	Gene_Vitvi01g02136.t01	transcript	Vitvi01g02136.t01	Coding	1\2	c.164+4T>G						,C	upstream_gene_variant	MODIFIER	Gene_Vitvi01g02137.t01	Gene_Vitvi01g02137.t01	transcript	Vitvi01g02137.t01	Coding		c.-1191A>C					1191	GT:PL:DP:AD 0\2:255,0,239:33:13,20 0\2:0,78,255:26:26,0
Noirv2.chr1 12796280 . C T 221.0 . DP=68;VDB=0.0251786;SGB=9.53539;RPB=0.541128;MQB=1;MQSB=1;BQB=0.98557;MQ0F=0;ICB=0.3;HOB=0.125;AC=1;AN=4;DP4=23,20,6,10;MQ=60;ANN=T	synonymous_variant	LOW	Gene_Vitvi01g02136.t01	Gene_Vitvi01g02136.t01	transcript	Vitvi01g02136.t01	Coding	1\2	c.141G>A	p.Gly47Gly	141\297	141\222	47\273		,T	upstream_gene_variant	MODIFIER	Gene_Vitvi01g02137.t01	Gene_Vitvi01g02137.t01	transcript	Vitvi01g02137.t01	Coding		c.-1164C>T					1164	GT:PL:DP:AD 0\2:0,108,255:36:36,0 0\2:255,0,127:23:7,16
Noirv2.chr1 12802665 . A G 450.0 . DP=58;VDB=0.188221;SGB=-10.2467;RPB=0.944216;MQB=1;MQSB=1;BQB=0.72807;MQ0F=0;ICB=0.5;HOB=0.5;AC=2;AN=4;DP4=14,11,12,15;MQ=60;ANN=G	synonymous_variant	LOW	Gene_Vitvi01g01035.t01	Gene_Vitvi01g01035.t01	transcript	Vitvi01g01035.t01	Coding	1\2	c.444T>C	p.Asn148Asn	517\271	444\266	148\287		WARNING_TRANSCRIPT_MULTIPLE_STOP_CODONS,G	downstream_gene_variant	MODIFIER	Gene_Vitvi01g02137.t01	Gene_Vitvi01g02137.t01	transcript	Vitvi01g02137.t01	Coding		c.*4942A>G					4942	GT:PL:DP:AD 0\2:228,0,255:29:16,13 0\2:255,0,180:23:9,14
Noirv2.chr1 12802674 . A G 152.0 . DP=58;VDB=0.552312;SGB=4.69269;RPB=0.963573;MQB=1;MQSB=1;BQB=0.974995;MQ0F=0;ICB=0.3;HOB=0.125;AC=1;AN=4;DP4=21,23,6,3;MQ=60;ANN=G	synonymous_variant	LOW	Gene_Vitvi01g01035.t01	Gene_Vitvi01g01035.t01	transcript	Vitvi01g01035.t01	Coding	1\2	c.435T>C	p.Asn145Asn	508\271	435\266	145\287		WARNING_TRANSCRIPT_MULTIPLE_STOP_CODONS,G	downstream_gene_variant	MODIFIER	Gene_Vitvi01g02137.t01	Gene_Vitvi01g02137.t01	transcript	Vitvi01g02137.t01	Coding		c.*4951A>G					4951	GT:PL:DP:AD 0\2:0,93,255:31:31,0 0\2:186,0,255:22:13,9
Noirv2.chr1 12802677 . C A 486.0 . DP=56;VDB=0.207115;SGB=-1.38495;RPB=1;MQB=1;MQSB=1;BQB=1;MQ0F=0;AC=4;AN=4;DP4=0,1,25,23;MQ=60;ANN=A	synonymous_variant	LOW	Gene_Vitvi01g01035.t01	Gene_Vitvi01g01035.t01	transcript	Vitvi01g01035.t01	Coding	1\2	c.432G>T	p.Ala144Ala	505\271	432\266	144\287		WARNING_TRANSCRIPT_MULTIPLE_STOP_CODONS,A	downstream_gene_variant	MODIFIER	Gene_Vitvi01g02137.t01	Gene_Vitvi01g02137.t01	transcript	Vitvi01g02137.t01	Coding		c.*4954C>A					4954	GT:PL:DP:AD 1\2:255,59,0:27:1,26 1\2:255,66,0:22:0,22
Noirv2.chr1 12802683 . A G 197.0 . DP=57;VDB=0.336113;SGB=6.76576;RPB=0.999941;MQB=1;MQSB=1;BQB=0.189351;MQ0F=0;ICB=0.3;HOB=0.125;AC=1;AN=4;DP4=20,20,6,6;MQ=60;ANN=G	synonymous_variant	LOW	Gene_Vitvi01g01035.t01	Gene_Vitvi01g01035.t01	transcript	Vitvi01g01035.t01	Coding	1\2	c.426T>C	p.Ser142Ser	499\271	426\266	142\287		WARNING_TRANSCRIPT_MULTIPLE_STOP_CODONS,G	downstream_gene_variant	MODIFIER	Gene_Vitvi01g02137.t01	Gene_Vitvi01g02137.t01	transcript	Vitvi01g02137.t01	Coding		c.*4960A>G					4960	GT:PL:DP:AD 0\2:231,0,251:27:15,12 0\2:0,75,255:25:25,0
Noirv2.chr1 12802691 . G T 447.0 . DP=60;VDB=0.428899;SGB=-1.09692;RPB=0.966521;MQB=1;MQSB=1;BQB=0.814517;MQ0F=0;ICB=0.3;HOB=0.125;AC=3;AN=4;DP4=6,4,21,20;MQ=60;ANN=T	synonymous_variant	LOW	Gene_Vitvi01g01035.t01	Gene_Vitvi01g01035.t01	transcript	Vitvi01g01035.t01	Coding	1\2	c.418C>A	p.Arg140Arg	491\271	418\266	140\287		WARNING_TRANSCRIPT_MULTIPLE_STOP_CODONS,T	downstream_gene_variant	MODIFIER	Gene_Vitvi01g02137.t01	Gene_Vitvi01g02137.t01	transcript	Vitvi01g02137.t01	Coding		c.*4968G>T					4968	GT:PL:DP:AD 1\2:255,87,0:29:0,29 0\2:226,0,206:22:10,12
Noirv2.chr1 12802737 . G A 191.0 . DP=50;VDB=0.161751;SGB=6.07412;RPB=0.742044;MQB=1;MQSB=1;BQB=0.787539;MQ0F=0;ICB=0.3;HOB=0.125;AC=1;AN=4;DP4=13,20,7,4;MQ=60;ANN=A	synonymous_variant	LOW	Gene_Vitvi01g01035.t01	Gene_Vitvi01g01035.t01	transcript	Vitvi01g01035.t01	Coding	1\2	c.372C>T	p.Leu124Leu	445\271	372\266	124\287		WARNING_TRANSCRIPT_MULTIPLE_STOP_CODONS GT:PL:DP:AD 0\2:225,0,223:22:11,11 0\2:0,66,255:22:22,0
Noirv2.chr1 12802842 . C T 398.0 . DP=40;VDB=0.824287;SGB=-8.09871;RPB=0.75484;MQB=1;MQSB=1;BQB=0.210019;MQ0F=0;ICB=0.5;HOB=0.5;AC=2;AN=4;DP4=9,6,10,10;MQ=60;ANN=T	synonymous_variant	LOW	Gene_Vitvi01g01035.t01	Gene_Vitvi01g01035.t01	transcript	Vitvi01g01035.t01	Coding	1\2	c.267G>A	p.Ala89Ala	340\271	267\266	89\287		WARNING_TRANSCRIPT_MULTIPLE_STOP_CODONS GT:PL:DP:AD 0\2:225,0,161:19:9,10 0\2:206,0,119:16:6,10
Noirv2.chr1 12802866 . C G 483.0 . DP=46;VDB=0.671394;SGB=-1.38131;MQSB=1;MQ0F=0;AC=4;AN=4;DP4=0,0,17,19;MQ=60;ANN=G	synonymous_variant	LOW	Gene_Vitvi01g01035.t01	Gene_Vitvi01g01035.t01	transcript	Vitvi01g01035.t01	Coding	1\2	c.243G>C	p.Gly81Gly	316\271	243\266	81\287		WARNING_TRANSCRIPT_MULTIPLE_STOP_CODONS GT:PL:DP:AD 1\2:255,57,0:19:0,19 1\2:255,51,0:17:0,17
Noirv2.chr1 12802947 . G C 483.0 . DP=46;VDB=0.0815962;SGB=-1.36908;MQSB=1;MQ0F=0;AC=4;AN=4;DP4=0,0,15,25;MQ=60;ANN=C	synonymous_variant	LOW	Gene_Vitvi01g01035.t01	Gene_Vitvi01g01035.t01	transcript	Vitvi01g01035.t01	Coding	1\2	c.162C>G	p.Leu54Leu	235\271	162\266	54\287		WARNING_TRANSCRIPT_MULTIPLE_STOP_CODONS GT:PL:DP:AD 1\2:255,48,0:16:0,16 1\2:255,72,0:24:0,24
Noirv2.chr1 12803013 . T G 345.0 . DP=50;VDB=0.889539;SGB=-7.485;RPB=0.960717;MQB=1;MQSB=1;BQB=0.973022;MQ0F=0;ICB=0.5;HOB=0.5;AC=2;AN=4;DP4=14,11,8,10;MQ=60;ANN=G	synonymous_variant	LOW	Gene_Vitvi01g01035.t01	Gene_Vitvi01g01035.t01	transcript	Vitvi01g01035.t01	Coding	1\2	c.96A>C	p.Ser32Ser	169\271	96\266	32\287		WARNING_TRANSCRIPT_MULTIPLE_STOP_CODONS GT:PL:DP:AD 0\2:133,0,192:15:9,6 0\2:245,0,255:28:16,12
Noirv2.chr1 12827571 . C T 477.0 . DP=64;VDB=0.317146;SGB=-11.4741;RPB=0.0373358;MQB=1;MQSB=1;BQB=0.912211;MQ0F=0;ICB=0.5;HOB=0.5;AC=2;AN=4;DP4=13,14,17,14;MQ=60;ANN=T	5_prime_UTR_premature_start_codon_gain_variant	LOW	Gene_Vitvi01g01036.t01	Gene_Vitvi01g01036.t01	transcript	Vitvi01g01036.t01	Coding	1\2	c.-168C>T						WARNING_TRANSCRIPT_MULTIPLE_STOP_CODONS,T	5_prime_UTR_variant	MODIFIER	Gene_Vitvi01g01036.t01	Gene_Vitvi01g01036.t01	transcript	Vitvi01g01036.t01	Coding	1\2	c.-168C>T					168	WARNING_TRANSCRIPT_MULTIPLE_STOP_CODONS,T	downstream_gene_variant	MODIFIER	Gene_Vitvi01g01037.t01	Gene_Vitvi01g01037.t01	transcript	Vitvi01g01037.t01	Coding		c.*3633G>A					3628	GT:PL:DP:AD 0\2:255,0,255:28:12,16 0\2:255,0,255:30:15,15
Noirv2.chr1 12827762 . T C 483.0 . DP=64;VDB=0.0951746;SGB=-1.38384;MQSB=1;MQ0F=0;AC=4;AN=4;DP4=0,0,31,24;MQ=60;ANN=C	synonymous_variant	LOW	Gene_Vitvi01g01036.t01	Gene_Vitvi01g01036.t01	transcript	Vitvi01g01036.t01	Coding	1\2	c.24T>C	p.Phe8Phe	277\299	24\208	8\201		WARNING_TRANSCRIPT_MULTIPLE_STOP_CODONS,C	downstream_gene_variant	MODIFIER	Gene_Vitvi01g01037.t01	Gene_Vitvi01g01037.t01	transcript	Vitvi01g01037.t01	Coding		c.*3442A>G					3437	GT:PL:DP:AD 1\2:255,96,0:32:0,32 1\2:255,69,0:23:0,23
Noirv2.chr1 12827789 . T C 221.0 . DP=66;VDB=0.949353;SGB=8.15014;RPB=0.699798;MQB=1;MQSB=1;BQB=0.919821;MQ0F=0;ICB=0.3;HOB=0.125;AC=1;AN=4;DP4=24,20,8,6;MQ=60;ANN=C	synonymous_variant	LOW	Gene_Vitvi01g01036.t01	Gene_Vitvi01g01036.t01	transcript	Vitvi01g01036.t01	Coding	1\2	c.51T>C	p.Tyr17Tyr	304\299	51\208	17\201		WARNING_TRANSCRIPT_MULTIPLE_STOP_CODONS,C	downstream_gene_variant	MODIFIER	Gene_Vitvi01g01037.t01	Gene_Vitvi01g01037.t01	transcript	Vitvi01g01037.t01	Coding		c.*3415A>G					3410	GT:PL:DP:AD 0\2:0,90,255:30:30,0 0\2:255,0,255:28:14,14
Noirv2.chr1 12827828 . C T 221.0 . DP=62;VDB=0.626321;SGB=10.9211;RPB=0.637066;MQB=1;MQSB=1;BQB=0.151948;MQ0F=0;ICB=0.3;HOB=0.125;AC=1;AN=4;DP4=23,17,6,12;MQ=60;ANN=T	synonymous_variant	LOW	Gene_Vitvi01g01036.t01	Gene_Vitvi01g01036.t01	transcript	Vitvi01g01036.t01	Coding	1\2	c.90C>T	p.His30His	343\299	90\208	30\201		WARNING_TRANSCRIPT_MULTIPLE_STOP_CODONS,T	downstream_gene_variant	MODIFIER	Gene_Vitvi01g01037.t01	Gene_Vitvi01g01037.t01	transcript	Vitvi01g01037.t01	Coding		c.*3376G>A					3371	GT:PL:DP:AD 0\2:255,0,214:29:11,18 0\2:0,87,255:29:29,0
Noirv2.chr1 12827900 . C T 440.0 . DP=62;VDB=0.445048;SGB=-11.4741;RPB=0.535973;MQB=1;MQSB=1;BQB=0.871198;MQ0F=0;ICB=0.5;HOB=0.5;AC=2;AN=4;DP4=15,14,15,16;MQ=60;ANN=T	synonymous_variant	LOW	Gene_Vitvi01g01036.t01	Gene_Vitvi01g01036.t01	transcript	Vitvi01g01036.t01	Coding	1\2	c.162C>T	p.Leu54Leu	415\299	162\208	54\201		WARNING_TRANSCRIPT_MULTIPLE_STOP_CODONS,T	downstream_gene_variant	MODIFIER	Gene_Vitvi01g01037.t01	Gene_Vitvi01g01037.t01	transcript	Vitvi01g01037.t01	Coding		c.*3304G>A					3299	GT:PL:DP:AD 0\2:255,0,243:34:14,20 0\2:218,0,255:26:15,11
Noirv2.chr1 12827936 . T G 217.0 . DP=60;VDB=0.893151;SGB=9.53539;RPB=0.972587;MQB=1;MQSB=1;BQB=0.75332;MQ0F=0;ICB=0.3;HOB=0.125;AC=1;AN=4;DP4=21,19,8,8;MQ=60;ANN=G	synonymous_variant	LOW	Gene_Vitvi01g01036.t01	Gene_Vitvi01g01036.t01	transcript	Vitvi01g01036.t01	Coding	1\2	c.198T>G	p.Val66Val	451\299	198\208	66\201		WARNING_TRANSCRIPT_MULTIPLE_STOP_CODONS,G	downstream_gene_variant	MODIFIER	Gene_Vitvi01g01037.t01	Gene_Vitvi01g01037.t01	transcript	Vitvi01g01037.t01	Coding		c.*3268A>C					3263	GT:PL:DP:AD 0\2:251,0,255:37:21,16 0\2:0,57,255:19:19,0
Noirv2.chr1 12827969 . C T 483.0 . DP=57;VDB=0.939359;SGB=-1.33829;MQSB=1;MQ0F=0;AC=4;AN=4;DP4=0,0,30,19;MQ=60;ANN=T	synonymous_variant	LOW	Gene_Vitvi01g01036.t01	Gene_Vitvi01g01036.t01	transcript	Vitvi01g01036.t01	Coding	1\2	c.231C>T	p.Thr77Thr	484\299	231\208	77\201		WARNING_TRANSCRIPT_MULTIPLE_STOP_CODONS,T	downstream_gene_variant	MODIFIER	Gene_Vitvi01g01037.t01	Gene_Vitvi01g01037.t01	transcript	Vitvi01g01037.t01	Coding		c.*3235G>A					3230	GT:PL:DP:AD 1\2:255,96,0:32:0,32 1\2:255,51,0:17:0,17
Noirv2.chr1 12828038 . A G 476.0 . DP=51;VDB=0.460416;SGB=-1.38231;RPB=0.867757;MQB=1;MQSB=1;BQB=0.958;MQ0F=0;ICB=0.3;HOB=0.125;AC=3;AN=4;DP4=4,6,19,17;MQ=60;ANN=G	synonymous_variant	LOW	Gene_Vitvi01g01036.t01	Gene_Vitvi01g01036.t01	transcript	Vitvi01g01036.t01	Coding	1\2	c.300A>G	p.Leu100Leu	553\299	300\208	100\201		WARNING_TRANSCRIPT_MULTIPLE_STOP_CODONS,G	downstream_gene_variant	MODIFIER	Gene_Vitvi01g01037.t01	Gene_Vitvi01g01037.t01	transcript	Vitvi01g01037.t01	Coding		c.*3166T>C					3161	GT:PL:DP:AD 0\2:255,0,185:28:10,18 1\2:255,54,0:18:0,18
Noirv2.chr1 12830135 . T C 475.0 . DP=57;VDB=0.255265;SGB=-1.33082;RPB=0.962209;MQB=1;MQSB=1;BQB=0.887515;MQ0F=0;ICB=0.3;HOB=0.125;AC=3;AN=4;DP4=9,3,19,20;MQ=60;ANN=C	splice_region_variant&intron_variant	LOW	Gene_Vitvi01g01036.t01	Gene_Vitvi01g01036.t01	transcript	Vitvi01g01036.t01	Coding	3\2	c.494+5T>C						WARNING_TRANSCRIPT_MULTIPLE_STOP_CODONS,C	downstream_gene_variant	MODIFIER	Gene_Vitvi01g01037.t01	Gene_Vitvi01g01037.t01	transcript	Vitvi01g01037.t01	Coding		c.*1069A>G					1064	,C	downstream_gene_variant	MODIFIER	Gene_Vitvi01g01038.t01	Gene_Vitvi01g01038.t01	transcript	Vitvi01g01038.t01	Coding		c.*5015A>G					4882	WARNING_TRANSCRIPT_MULTIPLE_STOP_CODONS GT:PL:DP:AD 1\2:255,75,0:25:0,25 0\2:254,0,221:26:12,14
Noirv2.chr1 12830324 . G A 465.0 . DP=59;VDB=0.974022;SGB=-1.02113;RPB=0.871659;MQB=1;MQSB=1;BQB=0.699747;MQ0F=0;ICB=0.3;HOB=0.125;AC=3;AN=4;DP4=3,7,23,23;MQ=60;ANN=A	stop_retained_variant	LOW	Gene_Vitvi01g01036.t01	Gene_Vitvi01g01036.t01	transcript	Vitvi01g01036.t01	Coding	4\2	c.599G>A	p.Ter200Ter	852\299	599\208	200\201		WARNING_TRANSCRIPT_MULTIPLE_STOP_CODONS,A	downstream_gene_variant	MODIFIER	Gene_Vitvi01g01037.t01	Gene_Vitvi01g01037.t01	transcript	Vitvi01g01037.t01	Coding		c.*880C>T					875	,A	downstream_gene_variant	MODIFIER	Gene_Vitvi01g01038.t01	Gene_Vitvi01g01038.t01	transcript	Vitvi01g01038.t01	Coding		c.*4826C>T					4693	WARNING_TRANSCRIPT_MULTIPLE_STOP_CODONS GT:PL:DP:AD 1\2:255,99,0:33:0,33 0\2:244,0,201:23:10,13
Noirv2.chr1 12831351 . C G 221.0 . DP=58;VDB=0.739233;SGB=9.53539;RPB=0.41512;MQB=1;MQSB=1;BQB=0.98712;MQ0F=0;ICB=0.3;HOB=0.125;AC=1;AN=4;DP4=18,20,6,10;MQ=60;ANN=G	synonymous_variant	LOW	Gene_Vitvi01g01037.t01	Gene_Vitvi01g01037.t01	transcript	Vitvi01g01037.t01	Coding	6\2	c.1293G>C	p.Ser431Ser	1430\2582	1293\2440	431\279		,G	downstream_gene_variant	MODIFIER	Gene_Vitvi01g01036.t01	Gene_Vitvi01g01036.t01	transcript	Vitvi01g01036.t01	Coding		c.*1018C>G					880	WARNING_TRANSCRIPT_MULTIPLE_STOP_CODONS,G	downstream_gene_variant	MODIFIER	Gene_Vitvi01g01038.t01	Gene_Vitvi01g01038.t01	transcript	Vitvi01g01038.t01	Coding		c.*3799G>C					3666	WARNING_TRANSCRIPT_MULTIPLE_STOP_CODONS GT:PL:DP:AD 0\2:255,0,255:32:16,16 0\2:0,66,255:22:22,0
Noirv2.chr1 12831386 . G A 155.0 . DP=51;VDB=0.799646;SGB=4.69269;RPB=0.493399;MQB=1;MQSB=1;BQB=0.524643;MQ0F=0;ICB=0.3;HOB=0.125;AC=1;AN=4;DP4=15,24,4,5;MQ=60;ANN=A	splice_region_variant&intron_variant	LOW	Gene_Vitvi01g01037.t01	Gene_Vitvi01g01037.t01	transcript	Vitvi01g01037.t01	Coding	5\2	c.1261-3C>T						,A	downstream_gene_variant	MODIFIER	Gene_Vitvi01g01036.t01	Gene_Vitvi01g01036.t01	transcript	Vitvi01g01036.t01	Coding		c.*1053G>A					915	WARNING_TRANSCRIPT_MULTIPLE_STOP_CODONS,A	downstream_gene_variant	MODIFIER	Gene_Vitvi01g01038.t01	Gene_Vitvi01g01038.t01	transcript	Vitvi01g01038.t01	Coding		c.*3764C>T					3631	WARNING_TRANSCRIPT_MULTIPLE_STOP_CODONS GT:PL:DP:AD 0\2:0,87,255:29:29,0 0\2:189,0,191:19:10,9
Noirv2.chr1 12831623 . T C 476.0 . DP=56;VDB=0.704455;SGB=-14.2358;RPB=0.90208;MQB=1;MQSB=1;BQB=0.808849;MQ0F=0;ICB=0.3;HOB=0.125;AC=3;AN=4;DP4=5,9,24,16;MQ=60;ANN=C	synonymous_variant	LOW	Gene_Vitvi01g01037.t01	Gene_Vitvi01g01037.t01	transcript	Vitvi01g01037.t01	Coding	5\2	c.1146A>G	p.Ser382Ser	1283\2582	1146\2440	382\279		,C	downstream_gene_variant	MODIFIER	Gene_Vitvi01g01036.t01	Gene_Vitvi01g01036.t01	transcript	Vitvi01g01036.t01	Coding		c.*1290T>C					1152	WARNING_TRANSCRIPT_MULTIPLE_STOP_CODONS,C	downstream_gene_variant	MODIFIER	Gene_Vitvi01g01038.t01	Gene_Vitvi01g01038.t01	transcript	Vitvi01g01038.t01	Coding		c.*3527A>G					3394	WARNING_TRANSCRIPT_MULTIPLE_STOP_CODONS GT:PL:DP:AD 0\2:255,0,238:31:14,16 1\2:255,69,0:23:0,23
Noirv2.chr1 12831956 . A G 221.0 . DP=69;VDB=0.59783;SGB=8.15014;RPB=0.820912;MQB=1;MQSB=1;BQB=0.978873;MQ0F=0;ICB=0.3;HOB=0.125;AC=1;AN=4;DP4=34,15,7,7;MQ=60;ANN=G	synonymous_variant	LOW	Gene_Vitvi01g01037.t01	Gene_Vitvi01g01037.t01	transcript	Vitvi01g01037.t01	Coding	4\2	c.900T>C	p.Asp300Asp	1037\2582	900\2440	300\279		,G	downstream_gene_variant	MODIFIER	Gene_Vitvi01g01036.t01	Gene_Vitvi01g01036.t01	transcript	Vitvi01g01036.t01	Coding		c.*1623A>G					1485	WARNING_TRANSCRIPT_MULTIPLE_STOP_CODONS,G	downstream_gene_variant	MODIFIER	Gene_Vitvi01g01038.t01	Gene_Vitvi01g01038.t01	transcript	Vitvi01g01038.t01	Coding		c.*3194T>C					3061	WARNING_TRANSCRIPT_MULTIPLE_STOP_CODONS GT:PL:DP:AD 0\2:0,105,255:35:35,0 0\2:255,0,255:28:14,14
Noirv2.chr1 12832106 . T A 164.0 . DP=63;VDB=0.906563;SGB=5.38303;RPB=0.93117;MQB=1;MQSB=1;BQB=0.973719;MQ0F=0;ICB=0.3;HOB=0.125;AC=1;AN=4;DP4=18,29,6,4;MQ=60;ANN=A	synonymous_variant	LOW	Gene_Vitvi01g01037.t01	Gene_Vitvi01g01037.t01	transcript	Vitvi01g01037.t01	Coding	4\2	c.750A>T	p.Arg250Arg	887\2582	750\2440	250\279		,A	downstream_gene_variant	MODIFIER	Gene_Vitvi01g01036.t01	Gene_Vitvi01g01036.t01	transcript	Vitvi01g01036.t01	Coding		c.*1773T>A					1635	WARNING_TRANSCRIPT_MULTIPLE_STOP_CODONS,A	downstream_gene_variant	MODIFIER	Gene_Vitvi01g01038.t01	Gene_Vitvi01g01038.t01	transcript	Vitvi01g01038.t01	Coding		c.*3044A>T					2911	WARNING_TRANSCRIPT_MULTIPLE_STOP_CODONS GT:PL:DP:AD 0\2:0,93,255:31:31,0 0\2:198,0,255:26:16,10
Noirv2.chr1 12832172 . A G 476.0 . DP=64;VDB=0.2285;SGB=-1.10542;RPB=0.936886;MQB=1;MQSB=1;BQB=0.984791;MQ0F=0;ICB=0.3;HOB=0.125;AC=3;AN=4;DP4=3,6,24,24;MQ=60;ANN=G	synonymous_variant	LOW	Gene_Vitvi01g01037.t01	Gene_Vitvi01g01037.t01	transcript	Vitvi01g01037.t01	Coding	4\2	c.684T>C	p.Asp228Asp	821\2582	684\2440	228\279		,G	downstream_gene_variant	MODIFIER	Gene_Vitvi01g01036.t01	Gene_Vitvi01g01036.t01	transcript	Vitvi01g01036.t01	Coding		c.*1839A>G					1701	WARNING_TRANSCRIPT_MULTIPLE_STOP_CODONS,G	downstream_gene_variant	MODIFIER	Gene_Vitvi01g01038.t01	Gene_Vitvi01g01038.t01	transcript	Vitvi01g01038.t01	Coding		c.*2978T>C					2845	WARNING_TRANSCRIPT_MULTIPLE_STOP_CODONS GT:PL:DP:AD 1\2:255,102,0:34:0,34 0\2:255,0,187:23:9,14
Noirv2.chr1 12832317 . G T 476.0 . DP=74;VDB=0.98262;SGB=-15.77;RPB=0.896569;MQB=1;MQSB=1;BQB=0.678253;MQ0F=0;ICB=0.3;HOB=0.125;AC=3;AN=4;DP4=15,7,18,27;MQ=60;ANN=T	splice_region_variant&intron_variant	LOW	Gene_Vitvi01g01037.t01	Gene_Vitvi01g01037.t01	transcript	Vitvi01g01037.t01	Coding	3\2	c.648+5C>A						,T	downstream_gene_variant	MODIFIER	Gene_Vitvi01g01036.t01	Gene_Vitvi01g01036.t01	transcript	Vitvi01g01036.t01	Coding		c.*1984G>T					1846	WARNING_TRANSCRIPT_MULTIPLE_STOP_CODONS,T	downstream_gene_variant	MODIFIER	Gene_Vitvi01g01038.t01	Gene_Vitvi01g01038.t01	transcript	Vitvi01g01038.t01	Coding		c.*2833C>A					2700	WARNING_TRANSCRIPT_MULTIPLE_STOP_CODONS GT:PL:DP:AD 1\2:255,87,0:29:0,29 0\2:255,0,255:38:22,16
Noirv2.chr1 12832352 . T A 221.0 . DP=69;VDB=0.117656;SGB=14.3863;RPB=0.999412;MQB=1;MQSB=1;BQB=0.393883;MQ0F=0;ICB=0.3;HOB=0.125;AC=1;AN=4;DP4=21,21,15,8;MQ=60;ANN=A	synonymous_variant	LOW	Gene_Vitvi01g01037.t01	Gene_Vitvi01g01037.t01	transcript	Vitvi01g01037.t01	Coding	3\2	c.618A>T	p.Ile206Ile	755\2582	618\2440	206\279		,A	downstream_gene_variant	MODIFIER	Gene_Vitvi01g01036.t01	Gene_Vitvi01g01036.t01	transcript	Vitvi01g01036.t01	Coding		c.*2019T>A					1881	WARNING_TRANSCRIPT_MULTIPLE_STOP_CODONS,A	downstream_gene_variant	MODIFIER	Gene_Vitvi01g01038.t01	Gene_Vitvi01g01038.t01	transcript	Vitvi01g01038.t01	Coding		c.*2798A>T					2665	WARNING_TRANSCRIPT_MULTIPLE_STOP_CODONS GT:PL:DP:AD 0\2:0,81,255:27:27,0 0\2:255,0,238:38:15,23
Noirv2.chr1 12832397 . G A 483.0 . DP=67;VDB=0.0358976;SGB=-1.3862;MQSB=1;MQ0F=0;AC=4;AN=4;DP4=0,0,32,30;MQ=60;ANN=A	synonymous_variant	LOW	Gene_Vitvi01g01037.t01	Gene_Vitvi01g01037.t01	transcript	Vitvi01g01037.t01	Coding	3\2	c.573C>T	p.Ile191Ile	710\2582	573\2440	191\279		,A	downstream_gene_variant	MODIFIER	Gene_Vitvi01g01036.t01	Gene_Vitvi01g01036.t01	transcript	Vitvi01g01036.t01	Coding		c.*2064G>A					1926	WARNING_TRANSCRIPT_MULTIPLE_STOP_CODONS,A	downstream_gene_variant	MODIFIER	Gene_Vitvi01g01038.t01	Gene_Vitvi01g01038.t01	transcript	Vitvi01g01038.t01	Coding		c.*2753C>T					2620	WARNING_TRANSCRIPT_MULTIPLE_STOP_CODONS GT:PL:DP:AD 1\2:255,90,0:30:0,30 1\2:255,96,0:32:0,32
Noirv2.chr1 12832816 . A T 221.0 . DP=56;VDB=0.170559;SGB=6.76576;RPB=0.707011;MQB=1;MQSB=1;BQB=0.959189;MQ0F=0;ICB=0.3;HOB=0.125;AC=1;AN=4;DP4=22,17,6,6;MQ=60;ANN=T	splice_region_variant&intron_variant	LOW	Gene_Vitvi01g01037.t01	Gene_Vitvi01g01037.t01	transcript	Vitvi01g01037.t01	Coding	2\2	c.354+6T>A						,T	downstream_gene_variant	MODIFIER	Gene_Vitvi01g01036.t01	Gene_Vitvi01g01036.t01	transcript	Vitvi01g01036.t01	Coding		c.*2483A>T					2345	WARNING_TRANSCRIPT_MULTIPLE_STOP_CODONS,T	downstream_gene_variant	MODIFIER	Gene_Vitvi01g01038.t01	Gene_Vitvi01g01038.t01	transcript	Vitvi01g01038.t01	Coding		c.*2334T>A					2201	WARNING_TRANSCRIPT_MULTIPLE_STOP_CODONS GT:PL:DP:AD 0\2:0,90,255:30:30,0 0\2:255,0,213:21:9,12
Noirv2.chr1 12833038 . CTT CT 476.0 . INDEL;IDV=38;IMF=0.904762;DP=77;VDB=0.956987;SGB=-1.17883;MQSB=1;MQ0F=0;ICB=0.3;HOB=0.125;AC=3;AN=4;DP4=10,10,24,33;MQ=60;ANN=CT	splice_region_variant&intron_variant	LOW	Gene_Vitvi01g01037.t01	Gene_Vitvi01g01037.t01	transcript	Vitvi01g01037.t01	Coding	1\2	c.139-3delA						,CT	downstream_gene_variant	MODIFIER	Gene_Vitvi01g01036.t01	Gene_Vitvi01g01036.t01	transcript	Vitvi01g01036.t01	Coding		c.*2707delT					2569	WARNING_TRANSCRIPT_MULTIPLE_STOP_CODONS,CT	downstream_gene_variant	MODIFIER	Gene_Vitvi01g01038.t01	Gene_Vitvi01g01038.t01	transcript	Vitvi01g01038.t01	Coding		c.*2110delA					1977	WARNING_TRANSCRIPT_MULTIPLE_STOP_CODONS GT:PL:DP:AD 1\2:255,86,0:42:2,40 0\2:255,0,255:35:18,17
Noirv2.chr1 12833232 . A G 409.0 . DP=57;VDB=0.56666;SGB=-13.3152;RPB=0.0409105;MQB=1;MQSB=1;BQB=0.768023;MQ0F=0;ICB=0.3;HOB=0.125;AC=3;AN=4;DP4=7,9,15,22;MQ=60;ANN=G	synonymous_variant	LOW	Gene_Vitvi01g01037.t01	Gene_Vitvi01g01037.t01	transcript	Vitvi01g01037.t01	Coding	1\2	c.123T>C	p.Phe41Phe	260\2582	123\2440	41\279		,G	downstream_gene_variant	MODIFIER	Gene_Vitvi01g01036.t01	Gene_Vitvi01g01036.t01	transcript	Vitvi01g01036.t01	Coding		c.*2899A>G					2761	WARNING_TRANSCRIPT_MULTIPLE_STOP_CODONS,G	downstream_gene_variant	MODIFIER	Gene_Vitvi01g01038.t01	Gene_Vitvi01g01038.t01	transcript	Vitvi01g01038.t01	Coding		c.*1918T>C					1785	WARNING_TRANSCRIPT_MULTIPLE_STOP_CODONS GT:PL:DP:AD 1\2:255,78,0:26:0,26 0\2:188,0,255:27:16,11
Noirv2.chr1 12833454 . C T 483.0 . DP=61;VDB=0.165129;SGB=-1.38563;MQSB=1;MQ0F=0;AC=4;AN=4;DP4=0,0,28,31;MQ=60;ANN=T	5_prime_UTR_premature_start_codon_gain_variant	LOW	Gene_Vitvi01g01037.t01	Gene_Vitvi01g01037.t01	transcript	Vitvi01g01037.t01	Coding	1\2	c.-100G>A						,T	5_prime_UTR_variant	MODIFIER	Gene_Vitvi01g01037.t01	Gene_Vitvi01g01037.t01	transcript	Vitvi01g01037.t01	Coding	1\2	c.-100G>A					100	,T	downstream_gene_variant	MODIFIER	Gene_Vitvi01g01036.t01	Gene_Vitvi01g01036.t01	transcript	Vitvi01g01036.t01	Coding		c.*3121C>T					2983	WARNING_TRANSCRIPT_MULTIPLE_STOP_CODONS,T	downstream_gene_variant	MODIFIER	Gene_Vitvi01g01038.t01	Gene_Vitvi01g01038.t01
Noirv2.chr1 12835422 . C T 483.0 . DP=54;VDB=0.539555;SGB=-1.3849;MQSB=1;MQ0F=0;AC=4;AN=4;DP4=0,0,26,26;MQ=60;ANN=T	synonymous_variant	LOW	Gene_Vitvi01g01038.t01	Gene_Vitvi01g01038.t01	transcript	Vitvi01g01038.t01	Coding	3\2	c.576G>A	p.Lys192Lys	674\2079	576\248	192\281		WARNING_TRANSCRIPT_MULTIPLE_STOP_CODONS,T	upstream_gene_variant	MODIFIER	Gene_Vitvi01g01037.t01	Gene_Vitvi01g01037.t01	transcript	Vitvi01g01037.t01	Coding		c.-2068G>A					1931	,T	downstream_gene_variant	MODIFIER	Gene_Vitvi01g01036.t01	Gene_Vitvi01g01036.t01	transcript	Vitvi01g01036.t01	Coding		c.*5089C>T					4951	WARNING_TRANSCRIPT_MULTIPLE_STOP_CODONS GT:PL:DP:AD 1\2:255,87,0:29:0,29 1\2:255,69,0:23:0,23
Noirv2.chr1 12836029 . A G 221.0 . DP=68;VDB=0.579878;SGB=9.53539;RPB=0.823587;MQB=1;MQSB=1;BQB=0.84819;MQ0F=0;ICB=0.3;HOB=0.125;AC=1;AN=4;DP4=32,13,7,9;MQ=60;ANN=G	splice_region_variant&intron_variant	LOW	Gene_Vitvi01g01038.t01	Gene_Vitvi01g01038.t01	transcript	Vitvi01g01038.t01	Coding	1\2	c.166+8T>C						WARNING_TRANSCRIPT_MULTIPLE_STOP_CODONS,G	upstream_gene_variant	MODIFIER	Gene_Vitvi01g01037.t01	Gene_Vitvi01g01037.t01	transcript	Vitvi01g01037.t01	Coding		c.-2675T>C					2538	GT:PL:DP:AD 0\2:255,0,255:39:23,16 0\2:0,66,255:22:22,0
Noirv2.chr1 12836158 . G A 128.0 . DP=54;VDB=0.437652;SGB=4.69269;RPB=0.996383;MQB=1;MQSB=1;BQB=0.610696;MQ0F=0;ICB=0.3;HOB=0.125;AC=1;AN=4;DP4=22,14,5,4;MQ=60;ANN=A	synonymous_variant	LOW	Gene_Vitvi01g01038.t01	Gene_Vitvi01g01038.t01	transcript	Vitvi01g01038.t01	Coding	1\2	c.45C>T	p.Phe15Phe	143\2079	45\248	15\281		WARNING_TRANSCRIPT_MULTIPLE_STOP_CODONS,A	upstream_gene_variant	MODIFIER	Gene_Vitvi01g01037.t01	Gene_Vitvi01g01037.t01	transcript	Vitvi01g01037.t01	Coding		c.-2804C>T					2667	GT:PL:DP:AD 0\2:0,84,255:28:28,0 0\2:162,0,144:17:8,9
Noirv2.chr1 12836194 . T C 154.0 . DP=50;VDB=0.187011;SGB=4.00342;RPB=0.972378;MQB=1;MQSB=1;BQB=0.907912;MQ0F=0;ICB=0.3;HOB=0.125;AC=1;AN=4;DP4=19,13,4,4;MQ=60;ANN=C	synonymous_variant	LOW	Gene_Vitvi01g01038.t01	Gene_Vitvi01g01038.t01	transcript	Vitvi01g01038.t01	Coding	1\2	c.9A>G	p.Gly3Gly	107\2079	9\248	3\281		WARNING_TRANSCRIPT_MULTIPLE_STOP_CODONS,C	upstream_gene_variant	MODIFIER	Gene_Vitvi01g01037.t01	Gene_Vitvi01g01037.t01	transcript	Vitvi01g01037.t01	Coding		c.-2840A>G					2703	GT:PL:DP:AD 0\2:0,75,255:25:25,0 0\2:188,0,176:15:7,8
Noirv2.chr1 12873746 . C T 483.0 . DP=80;VDB=0.730752;SGB=-1.38353;MQSB=1;MQ0F=0;AC=4;AN=4;DP4=0,0,33,37;MQ=60;ANN=T	splice_region_variant	LOW	Gene_Vitvi01g01040.t01	Gene_Vitvi01g01040.t01	transcript	Vitvi01g01040.t01	Coding	2\23	c.-25C>T						,T	5_prime_UTR_variant	MODIFIER	Gene_Vitvi01g01040.t01	Gene_Vitvi01g01040.t01	transcript	Vitvi01g01040.t01	Coding	2\23	c.-25C>T					25	GT:PL:DP:AD 1\2:255,129,0:43:0,43 1\2:255,81,0:27:0,27
Noirv2.chr1 12875991 . G A 342.0 . DP=55;VDB=0.257348;SGB=-13.0084;RPB=0.15406;MQB=1;MQSB=1;BQB=0.810684;MQ0F=0;ICB=0.3;HOB=0.125;AC=3;AN=4;DP4=8,9,20,16;MQ=60;ANN=A	synonymous_variant	LOW	Gene_Vitvi01g01040.t01	Gene_Vitvi01g01040.t01	transcript	Vitvi01g01040.t01	Coding	4\23	c.297G>A	p.Val99Val	423\2548	297\2209	99\2402		GT:PL:DP:AD 1\2:255,90,0:30:0,30 0\2:121,0,255:23:17,6
Noirv2.chr1 12876063 . T C 410.0 . DP=60;VDB=0.37402;SGB=0.532585;RPB=0.280608;MQB=1;MQSB=1;BQB=0.904719;MQ0F=0;ICB=0.3;HOB=0.125;AC=3;AN=4;DP4=5,8,23,22;MQ=60;ANN=C	synonymous_variant	LOW	Gene_Vitvi01g01040.t01	Gene_Vitvi01g01040.t01	transcript	Vitvi01g01040.t01	Coding	4\23	c.369T>C	p.Ser123Ser	495\2548	369\2209	123\2402		GT:PL:DP:AD 1\2:255,108,0:36:0,36 0\2:189,0,255:22:13,9
Noirv2.chr1 12876105 . T C 448.0 . DP=63;VDB=0.677936;SGB=-0.242518;RPB=0.466532;MQB=0.992819;MQSB=0.965761;BQB=0.0248522;MQ0F=0;ICB=0.3;HOB=0.125;AC=3;AN=4;DP4=8,6,28,19;MQ=59;ANN=C	synonymous_variant	LOW	Gene_Vitvi01g01040.t01	Gene_Vitvi01g01040.t01	transcript	Vitvi01g01040.t01	Coding	4\23	c.411T>C	p.Gly137Gly	537\2548	411\2209	137\2402		GT:PL:DP:AD 1\2:255,108,0:36:0,36 0\2:227,0,220:25:14,11
Noirv2.chr1 12876154 . C A 211.0 . DP=69;VDB=0.723146;SGB=6.07412;RPB=0.59314;MQB=1;MQSB=1;BQB=0.834374;MQ0F=0;ICB=0.3;HOB=0.125;AC=1;AN=4;DP4=30,19,6,5;MQ=60;ANN=A	synonymous_variant	LOW	Gene_Vitvi01g01040.t01	Gene_Vitvi01g01040.t01	transcript	Vitvi01g01040.t01	Coding	4\23	c.460C>A	p.Arg154Arg	586\2548	460\2209	154\2402		GT:PL:DP:AD 0\2:0,102,255:34:34,0 0\2:245,0,255:26:15,11
Noirv2.chr1 12876255 . T C 476.0 . DP=71;VDB=0.742155;SGB=-1.3216;RPB=0.940064;MQB=1;MQSB=1;BQB=0.702491;MQ0F=0;ICB=0.3;HOB=0.125;AC=3;AN=4;DP4=7,7,23,24;MQ=60;ANN=C	synonymous_variant	LOW	Gene_Vitvi01g01040.t01	Gene_Vitvi01g01040.t01	transcript	Vitvi01g01040.t01	Coding	4\23	c.561T>C	p.His187His	687\2548	561\2209	187\2402		GT:PL:DP:AD 1\2:255,93,0:31:0,31 0\2:255,0,255:30:14,16
Noirv2.chr1 12876411 . G A 483.0 . DP=70;VDB=0.757346;SGB=-1.25955;MQSB=1;MQ0F=0;AC=4;AN=4;DP4=0,0,34,31;MQ=60;ANN=A	splice_region_variant&intron_variant	LOW	Gene_Vitvi01g01040.t01	Gene_Vitvi01g01040.t01	transcript	Vitvi01g01040.t01	Coding	4\22	c.565-4G>A						GT:PL:DP:AD 1\2:255,135,0:45:0,45 1\2:255,60,0:20:0,20
Noirv2.chr1 12878559 . T C 221.0 . DP=78;VDB=0.785373;SGB=9.53539;RPB=0.952446;MQB=1;MQSB=1;BQB=0.742971;MQ0F=0;ICB=0.3;HOB=0.125;AC=1;AN=4;DP4=31,29,9,7;MQ=60;ANN=C	synonymous_variant	LOW	Gene_Vitvi01g01040.t01	Gene_Vitvi01g01040.t01	transcript	Vitvi01g01040.t01	Coding	10\23	c.1434T>C	p.Asn478Asn	1560\2548	1434\2209	478\2402		GT:PL:DP:AD 0\2:0,135,255:45:45,0 0\2:255,0,255:31:15,16
Noirv2.chr1 12880113 . G A 430.0 . DP=63;VDB=0.207265;SGB=-9.63298;RPB=0.589286;MQB=1;MQSB=1;BQB=0.93146;MQ0F=0;ICB=0.5;HOB=0.5;AC=2;AN=4;DP4=17,16,14,11;MQ=60;ANN=A	splice_region_variant&intron_variant	LOW	Gene_Vitvi01g01040.t01	Gene_Vitvi01g01040.t01	transcript	Vitvi01g01040.t01	Coding	11\22	c.1564-6G>A						GT:PL:DP:AD 0\2:233,0,255:36:23,13 0\2:230,0,169:22:10,12
Noirv2.chr1 12880304 . T C 483.0 . DP=61;VDB=0.732857;SGB=-1.38617;MQSB=1;MQ0F=0;AC=4;AN=4;DP4=0,0,30,29;MQ=60;ANN=C	synonymous_variant	LOW	Gene_Vitvi01g01040.t01	Gene_Vitvi01g01040.t01	transcript	Vitvi01g01040.t01	Coding	12\23	c.1749T>C	p.Asp583Asp	1875\2548	1749\2209	583\2402		GT:PL:DP:AD 1\2:255,87,0:29:0,29 1\2:255,90,0:30:0,30
Noirv2.chr1 12880398 . T C 483.0 . DP=67;VDB=0.306424;SGB=-1.38604;MQSB=1;MQ0F=0;AC=4;AN=4;DP4=0,0,28,33;MQ=60;ANN=C	splice_region_variant&intron_variant	LOW	Gene_Vitvi01g01040.t01	Gene_Vitvi01g01040.t01	transcript	Vitvi01g01040.t01	Coding	12\22	c.1776-5T>C						GT:PL:DP:AD 1\2:255,99,0:33:0,33 1\2:255,84,0:28:0,28
Noirv2.chr1 12893718 . A G 210.0 . DP=75;VDB=0.606741;SGB=6.76576;RPB=0.301782;MQB=1;MQSB=1;BQB=0.274726;MQ0F=0;ICB=0.3;HOB=0.125;AC=1;AN=4;DP4=32,29,6,6;MQ=60;ANN=G	synonymous_variant	LOW	Gene_Vitvi01g01040.t01	Gene_Vitvi01g01040.t01	transcript	Vitvi01g01040.t01	Coding	16\23	c.2067A>G	p.Lys689Lys	2193\2548	2067\2209	689\2402		GT:PL:DP:AD 0\2:0,129,255:43:43,0 0\2:244,0,255:30:18,12
Noirv2.chr1 12894198 . T C 466.0 . DP=65;VDB=0.834014;SGB=-0.88639;RPB=0.998605;MQB=1;MQSB=1;BQB=0.817919;MQ0F=0;ICB=0.3;HOB=0.125;AC=3;AN=4;DP4=7,6,22,26;MQ=60;ANN=C	synonymous_variant	LOW	Gene_Vitvi01g01040.t01	Gene_Vitvi01g01040.t01	transcript	Vitvi01g01040.t01	Coding	16\23	c.2547T>C	p.Thr849Thr	2673\2548	2547\2209	849\2402		GT:PL:DP:AD 1\2:255,105,0:35:0,35 0\2:245,0,255:26:13,13
Noirv2.chr1 12894450 . T C 174.0 . DP=64;VDB=0.399491;SGB=6.76576;RPB=0.985777;MQB=1;MQSB=1;BQB=0.454331;MQ0F=0;ICB=0.3;HOB=0.125;AC=1;AN=4;DP4=22,28,3,9;MQ=60;ANN=C	synonymous_variant	LOW	Gene_Vitvi01g01040.t01	Gene_Vitvi01g01040.t01	transcript	Vitvi01g01040.t01	Coding	16\23	c.2799T>C	p.Thr933Thr	2925\2548	2799\2209	933\2402		GT:PL:DP:AD 0\2:0,96,255:32:32,0 0\2:208,0,255:30:18,12
Noirv2.chr1 12894465 . G T 197.0 . DP=64;VDB=0.681619;SGB=7.4578;RPB=0.796598;MQB=1;MQSB=1;BQB=0.917486;MQ0F=0;ICB=0.3;HOB=0.125;AC=1;AN=4;DP4=22,27,5,8;MQ=60;ANN=T	synonymous_variant	LOW	Gene_Vitvi01g01040.t01	Gene_Vitvi01g01040.t01	transcript	Vitvi01g01040.t01	Coding	16\23	c.2814G>T	p.Val938Val	2940\2548	2814\2209	938\2402		GT:PL:DP:AD 0\2:0,87,255:29:29,0 0\2:231,0,255:33:20,13
Noirv2.chr1 12894720 . C T 483.0 . DP=54;VDB=0.435498;SGB=-1.37407;MQSB=1;MQ0F=0;AC=4;AN=4;DP4=0,0,25,24;MQ=60;ANN=T	synonymous_variant	LOW	Gene_Vitvi01g01040.t01	Gene_Vitvi01g01040.t01	transcript	Vitvi01g01040.t01	Coding	16\23	c.3069C>T	p.Asn1023Asn	3195\2548	3069\2209	1023\2402		GT:PL:DP:AD 1\2:255,90,0:30:0,30 1\2:255,57,0:19:0,19
Noirv2.chr1 12895286 . A G 483.0 . DP=65;VDB=0.896137;SGB=-1.386;MQSB=1;MQ0F=0;AC=4;AN=4;DP4=0,0,32,26;MQ=60;ANN=G	synonymous_variant	LOW	Gene_Vitvi01g01040.t01	Gene_Vitvi01g01040.t01	transcript	Vitvi01g01040.t01	Coding	18\23	c.3345A>G	p.Thr1115Thr	3471\2548	3345\2209	1115\2402		GT:PL:DP:AD 1\2:255,81,0:27:0,27 1\2:255,93,0:31:0,31
Noirv2.chr1 12895807 . G A 483.0 . DP=73;VDB=0.370315;SGB=-1.38208;MQSB=1;MQ0F=0;AC=4;AN=4;DP4=0,0,30,35;MQ=60;ANN=A	synonymous_variant	LOW	Gene_Vitvi01g01040.t01	Gene_Vitvi01g01040.t01	transcript	Vitvi01g01040.t01	Coding	19\23	c.3759G>A	p.Glu1253Glu	3885\2548	3759\2209	1253\2402		GT:PL:DP:AD 1\2:255,120,0:40:0,40 1\2:255,75,0:25:0,25
Noirv2.chr1 12895810 . A G 477.0 . DP=75;VDB=0.794124;SGB=-12.3947;RPB=0.822276;MQB=1;MQSB=1;BQB=0.237701;MQ0F=0;ICB=0.5;HOB=0.5;AC=2;AN=4;DP4=15,15,15,19;MQ=60;ANN=G	synonymous_variant	LOW	Gene_Vitvi01g01040.t01	Gene_Vitvi01g01040.t01	transcript	Vitvi01g01040.t01	Coding	19\23	c.3762A>G	p.Glu1254Glu	3888\2548	3762\2209	1254\2402		GT:PL:DP:AD 0\2:255,0,255:39:20,19 0\2:255,0,207:25:10,15
Noirv2.chr1 12895828 . T G 221.0 . DP=78;VDB=0.631268;SGB=9.53539;RPB=0.0410326;MQB=1;MQSB=1;BQB=0.978333;MQ0F=0;ICB=0.3;HOB=0.125;AC=1;AN=4;DP4=24,24,6,10;MQ=60;ANN=G	synonymous_variant	LOW	Gene_Vitvi01g01040.t01	Gene_Vitvi01g01040.t01	transcript	Vitvi01g01040.t01	Coding	19\23	c.3780T>G	p.Pro1260Pro	3906\2548	3780\2209	1260\2402		GT:PL:DP:AD 0\2:255,0,255:37:21,16 0\2:0,81,255:27:27,0
Noirv2.chr1 12896634 . C T 459.0 . DP=65;VDB=0.995147;SGB=-11.1672;RPB=0.434297;MQB=1;MQSB=1;BQB=0.822276;MQ0F=0;ICB=0.5;HOB=0.5;AC=2;AN=4;DP4=17,17,12,18;MQ=60;ANN=T	synonymous_variant	LOW	Gene_Vitvi01g01040.t01	Gene_Vitvi01g01040.t01	transcript	Vitvi01g01040.t01	Coding	20\23	c.3802C>T	p.Leu1268Leu	3928\2548	3802\2209	1268\2402		GT:PL:DP:AD 0\2:255,0,255:36:18,18 0\2:237,0,255:28:16,12
Noirv2.chr1 12897331 . C G 221.0 . DP=56;VDB=0.367989;SGB=7.4578;RPB=0.932348;MQB=1;MQSB=1;BQB=0.95788;MQ0F=0;ICB=0.3;HOB=0.125;AC=1;AN=4;DP4=18,23,7,6;MQ=60;ANN=G	synonymous_variant	LOW	Gene_Vitvi01g01040.t01	Gene_Vitvi01g01040.t01	transcript	Vitvi01g01040.t01	Coding	23\23	c.4140C>G	p.Leu1380Leu	4266\2548	4140\2209	1380\2402		GT:PL:DP:AD 0\2:0,99,255:33:33,0 0\2:255,0,177:21:8,13
Noirv2.chr1 12911649 . G A 68.0 . DP=5;VDB=0.106137;SGB=0.908071;MQSB=1;MQ0F=0;AC=2;AN=2;DP4=0,0,1,3;MQ=27;ANN=A	synonymous_variant	LOW	Gene_Vitvi01g01043.t01	Gene_Vitvi01g01043.t01	transcript	Vitvi01g01043.t01	Coding	1\2	c.126C>T	p.Ile42Ile	126\250	126\250	42\29		GT:PL:DP:AD ./.:0,0,0:0:0,0 1\2:95,12,0:4:0,4
Noirv2.chr1 12945435 . G A 477.0 . DP=67;VDB=0.751268;SGB=-11.4741;RPB=0.999316;MQB=1;MQSB=1;BQB=0.77718;MQ0F=0;ICB=0.5;HOB=0.5;AC=2;AN=4;DP4=13,16,14,17;MQ=60;ANN=A	synonymous_variant	LOW	Gene_Vitvi01g01044.t01	Gene_Vitvi01g01044.t01	transcript	Vitvi01g01044.t01	Coding	16\26	c.2556C>T	p.Tyr852Tyr	2621\2843	2556\2652	852\283		GT:PL:DP:AD 0\2:255,0,255:38:20,18 0\2:255,0,187:22:9,13
Noirv2.chr1 12947048 . T C 221.0 . DP=69;VDB=0.524397;SGB=10.2282;RPB=0.987076;MQB=1;MQSB=1;BQB=0.91917;MQ0F=0;ICB=0.3;HOB=0.125;AC=1;AN=4;DP4=29,20,10,7;MQ=60;ANN=C	synonymous_variant	LOW	Gene_Vitvi01g01044.t01	Gene_Vitvi01g01044.t01	transcript	Vitvi01g01044.t01	Coding	14\26	c.2415A>G	p.Val805Val	2480\2843	2415\2652	805\283		GT:PL:DP:AD 0\2:0,111,255:37:37,0 0\2:255,0,248:29:12,17
Noirv2.chr1 12947111 . A G 196.0 . DP=69;VDB=0.506022;SGB=8.15014;RPB=0.825541;MQB=1;MQSB=1;BQB=0.362315;MQ0F=0;ICB=0.3;HOB=0.125;AC=1;AN=4;DP4=27,28,10,4;MQ=60;ANN=G	synonymous_variant	LOW	Gene_Vitvi01g01044.t01	Gene_Vitvi01g01044.t01	transcript	Vitvi01g01044.t01	Coding	14\26	c.2352T>C	p.Asn784Asn	2417\2843	2352\2652	784\283		GT:PL:DP:AD 0\2:0,117,255:39:39,0 0\2:230,0,255:30:16,14
Noirv2.chr1 12947120 . G A 221.0 . DP=71;VDB=0.579822;SGB=16.4657;RPB=0.848655;MQB=1;MQSB=1;BQB=0.377192;MQ0F=0;ICB=0.3;HOB=0.125;AC=1;AN=4;DP4=25,20,13,13;MQ=60;ANN=A	synonymous_variant	LOW	Gene_Vitvi01g01044.t01	Gene_Vitvi01g01044.t01	transcript	Vitvi01g01044.t01	Coding	14\26	c.2343C>T	p.Pro781Pro	2408\2843	2343\2652	781\283		GT:PL:DP:AD 0\2:255,0,246:42:16,26 0\2:0,87,255:29:29,0
Noirv2.chr1 12947156 . G A 458.0 . DP=65;VDB=0.728264;SGB=-12.7015;RPB=0.841313;MQB=1;MQSB=1;BQB=0.529713;MQ0F=0;ICB=0.5;HOB=0.5;AC=2;AN=4;DP4=14,14,15,20;MQ=60;ANN=A	synonymous_variant	LOW	Gene_Vitvi01g01044.t01	Gene_Vitvi01g01044.t01	transcript	Vitvi01g01044.t01	Coding	14\26	c.2307C>T	p.Asp769Asp	2372\2843	2307\2652	769\283		GT:PL:DP:AD 0\2:255,0,255:39:17,22 0\2:236,0,211:24:11,13
Noirv2.chr1 12947174 . C T 422.0 . DP=59;VDB=0.388071;SGB=-11.1672;RPB=0.934671;MQB=1;MQSB=1;BQB=0.587827;MQ0F=0;ICB=0.5;HOB=0.5;AC=2;AN=4;DP4=11,16,17,13;MQ=60;ANN=T	synonymous_variant	LOW	Gene_Vitvi01g01044.t01	Gene_Vitvi01g01044.t01	transcript	Vitvi01g01044.t01	Coding	14\26	c.2289G>A	p.Leu763Leu	2354\2843	2289\2652	763\283		GT:PL:DP:AD 0\2:255,0,255:35:16,19 0\2:200,0,215:22:11,11
Noirv2.chr1 12947183 . C T 465.0 . DP=60;VDB=0.782182;SGB=-12.0878;RPB=0.874383;MQB=1;MQSB=1;BQB=0.397599;MQ0F=0;ICB=0.5;HOB=0.5;AC=2;AN=4;DP4=9,16,18,15;MQ=60;ANN=T	synonymous_variant	LOW	Gene_Vitvi01g01044.t01	Gene_Vitvi01g01044.t01	transcript	Vitvi01g01044.t01	Coding	14\26	c.2280G>A	p.Ser760Ser	2345\2843	2280\2652	760\283		GT:PL:DP:AD 0\2:255,0,255:36:16,20 0\2:243,0,181:22:9,13
Noirv2.chr1 12948234 . T A 221.0 . DP=69;VDB=0.313211;SGB=10.9211;RPB=0.404089;MQB=1;MQSB=1;BQB=0.392418;MQ0F=0;ICB=0.3;HOB=0.125;AC=1;AN=4;DP4=31,17,7,11;MQ=60;ANN=A	synonymous_variant	LOW	Gene_Vitvi01g01044.t01	Gene_Vitvi01g01044.t01	transcript	Vitvi01g01044.t01	Coding	11\26	c.2070A>T	p.Leu690Leu	2135\2843	2070\2652	690\283		GT:PL:DP:AD 0\2:255,0,255:43:25,18 0\2:0,69,255:23:23,0
Noirv2.chr1 12948300 . A G 426.0 . DP=68;VDB=0.0567772;SGB=-10.5535;RPB=0.976252;MQB=1;MQSB=1;BQB=0.80922;MQ0F=0;ICB=0.5;HOB=0.5;AC=2;AN=4;DP4=19,15,18,10;MQ=60;ANN=G	synonymous_variant	LOW	Gene_Vitvi01g01044.t01	Gene_Vitvi01g01044.t01	transcript	Vitvi01g01044.t01	Coding	11\26	c.2004T>C	p.Pro668Pro	2069\2843	2004\2652	668\283		GT:PL:DP:AD 0\2:255,0,255:38:20,18 0\2:204,0,255:24:14,10
Noirv2.chr1 12948916 . T C 181.0 . DP=43;VDB=0.0110055;SGB=6.07412;RPB=0.970869;MQB=1;MQSB=1;BQB=0.283536;MQ0F=0;ICB=0.3;HOB=0.125;AC=1;AN=4;DP4=11,20,5,6;MQ=60;ANN=C	splice_region_variant&intron_variant	LOW	Gene_Vitvi01g01044.t01	Gene_Vitvi01g01044.t01	transcript	Vitvi01g01044.t01	Coding	10\25	c.1977+7A>G						GT:PL:DP:AD 0\2:215,0,227:22:11,11 0\2:0,60,255:20:20,0
Noirv2.chr1 12949725 . T A 221.0 . DP=83;VDB=0.00885821;SGB=13.0002;RPB=0.791729;MQB=1;MQSB=1;BQB=0.935107;MQ0F=0;ICB=0.3;HOB=0.125;AC=1;AN=4;DP4=39,20,10,11;MQ=60;ANN=A	splice_region_variant&intron_variant	LOW	Gene_Vitvi01g01044.t01	Gene_Vitvi01g01044.t01	transcript	Vitvi01g01044.t01	Coding	7\25	c.1577+7A>T						GT:PL:DP:AD 0\2:0,129,255:43:43,0 0\2:255,0,234:37:16,21
Noirv2.chr1 12949758 . T C 428.0 . DP=80;VDB=0.0250578;SGB=-13.9289;RPB=0.036954;MQB=1;MQSB=1;BQB=0.977182;MQ0F=0;ICB=0.5;HOB=0.5;AC=2;AN=4;DP4=17,22,29,10;MQ=60;ANN=C	synonymous_variant	LOW	Gene_Vitvi01g01044.t01	Gene_Vitvi01g01044.t01	transcript	Vitvi01g01044.t01	Coding	7\26	c.1551A>G	p.Glu517Glu	1616\2843	1551\2652	517\283		GT:PL:DP:AD 0\2:255,0,255:42:17,25 0\2:206,0,255:36:22,14
Noirv2.chr1 12950034 . T C 477.0 . DP=84;VDB=0.985804;SGB=-13.6221;RPB=0.94009;MQB=1;MQSB=1;BQB=0.962868;MQ0F=0;ICB=0.5;HOB=0.5;AC=2;AN=4;DP4=19,20,17,21;MQ=60;ANN=C	synonymous_variant	LOW	Gene_Vitvi01g01044.t01	Gene_Vitvi01g01044.t01	transcript	Vitvi01g01044.t01	Coding	7\26	c.1275A>G	p.Ser425Ser	1340\2843	1275\2652	425\283		GT:PL:DP:AD 0\2:255,0,255:48:28,20 0\2:255,0,219:29:11,18
Noirv2.chr1 12950771 . TAAAAAAAA TAAAAAAAAAAAAAA 221.0 . INDEL;IDV=19;IMF=0.358491;DP=91;VDB=0.823815;SGB=11.6141;MQSB=0.984177;MQ0F=0;ICB=0.3;HOB=0.125;AC=1;AN=4;DP4=35,37,10,9;MQ=59;ANN=TAAAAAAAAAAAAAA	splice_region_variant&intron_variant	LOW	Gene_Vitvi01g01044.t01	Gene_Vitvi01g01044.t01	transcript	Vitvi01g01044.t01	Coding	6\25	c.1160+7_1160+8insTTTTTT						GT:PL:DP:AD 0\2:255,0,255:53:34,17 0\2:0,114,255:38:38,0
Noirv2.chr1 12950849 . G A 221.0 . DP=64;VDB=0.155125;SGB=9.53539;RPB=0.968683;MQB=1;MQSB=1;BQB=0.839508;MQ0F=0;ICB=0.3;HOB=0.125;AC=1;AN=4;DP4=24,18,8,8;MQ=60;ANN=A	synonymous_variant	LOW	Gene_Vitvi01g01044.t01	Gene_Vitvi01g01044.t01	transcript	Vitvi01g01044.t01	Coding	6\26	c.1098C>T	p.Tyr366Tyr	1163\2843	1098\2652	366\283		GT:PL:DP:AD 0\2:0,90,255:30:30,0 0\2:255,0,232:28:12,16
Noirv2.chr1 12950894 . A G 221.0 . DP=71;VDB=0.540483;SGB=17.852;RPB=0.790681;MQB=1;MQSB=1;BQB=0.909274;MQ0F=0;ICB=0.3;HOB=0.125;AC=1;AN=4;DP4=20,20,21,7;MQ=60;ANN=G	synonymous_variant	LOW	Gene_Vitvi01g01044.t01	Gene_Vitvi01g01044.t01	transcript	Vitvi01g01044.t01	Coding	6\26	c.1053T>C	p.Ser351Ser	1118\2843	1053\2652	351\283		GT:PL:DP:AD 0\2:255,0,153:37:9,28 0\2:0,93,255:31:31,0
Noirv2.chr1 12952046 . A G 221.0 . DP=84;VDB=0.972254;SGB=13.6932;RPB=0.999986;MQB=1;MQSB=1;BQB=0.486843;MQ0F=0;ICB=0.3;HOB=0.125;AC=1;AN=4;DP4=35,24,10,12;MQ=60;ANN=G	synonymous_variant	LOW	Gene_Vitvi01g01044.t01	Gene_Vitvi01g01044.t01	transcript	Vitvi01g01044.t01	Coding	4\26	c.825T>C	p.Ala275Ala	890\2843	825\2652	275\283		,G	downstream_gene_variant	MODIFIER	Gene_Vitvi01g01045.t01	Gene_Vitvi01g01045.t01	transcript	Vitvi01g01045.t01	Coding		c.*4945T>C					4945	GT:PL:DP:AD 0\2:255,0,255:43:21,22 0\2:0,114,255:38:38,0
Noirv2.chr1 12952153 . T G 221.0 . DP=83;VDB=0.611754;SGB=10.2282;RPB=0.979041;MQB=1;MQSB=1;BQB=0.539212;MQ0F=0;ICB=0.3;HOB=0.125;AC=1;AN=4;DP4=34,29,9,8;MQ=60;ANN=G	synonymous_variant	LOW	Gene_Vitvi01g01044.t01	Gene_Vitvi01g01044.t01	transcript	Vitvi01g01044.t01	Coding	4\26	c.718A>C	p.Arg240Arg	783\2843	718\2652	240\283		,G	downstream_gene_variant	MODIFIER	Gene_Vitvi01g01045.t01	Gene_Vitvi01g01045.t01	transcript	Vitvi01g01045.t01	Coding		c.*4838A>C					4838	GT:PL:DP:AD 0\2:255,0,255:39:22,17 0\2:0,123,255:41:41,0
Noirv2.chr1 12952214 . T C 221.0 . DP=79;VDB=0.135574;SGB=13.6932;RPB=0.89087;MQB=1;MQSB=1;BQB=0.705681;MQ0F=0;ICB=0.3;HOB=0.125;AC=1;AN=4;DP4=22,26,13,9;MQ=60;ANN=C	synonymous_variant	LOW	Gene_Vitvi01g01044.t01	Gene_Vitvi01g01044.t01	transcript	Vitvi01g01044.t01	Coding	4\26	c.657A>G	p.Leu219Leu	722\2843	657\2652	219\283		,C	downstream_gene_variant	MODIFIER	Gene_Vitvi01g01045.t01	Gene_Vitvi01g01045.t01	transcript	Vitvi01g01045.t01	Coding		c.*4777A>G					4777	GT:PL:DP:AD 0\2:255,0,212:34:12,22 0\2:0,108,255:36:36,0
Noirv2.chr1 12953295 . C T 205.0 . DP=67;VDB=0.286386;SGB=9.53539;RPB=0.975861;MQB=1;MQSB=1;BQB=0.151663;MQ0F=0;ICB=0.3;HOB=0.125;AC=1;AN=4;DP4=27,20,12,4;MQ=60;ANN=T	synonymous_variant	LOW	Gene_Vitvi01g01044.t01	Gene_Vitvi01g01044.t01	transcript	Vitvi01g01044.t01	Coding	3\26	c.531G>A	p.Thr177Thr	596\2843	531\2652	177\283		,T	downstream_gene_variant	MODIFIER	Gene_Vitvi01g01045.t01	Gene_Vitvi01g01045.t01	transcript	Vitvi01g01045.t01	Coding		c.*3696G>A					3696	GT:PL:DP:AD 0\2:239,0,255:31:15,16 0\2:0,96,255:32:32,0
Noirv2.chr1 12953367 . G A 221.0 . DP=72;VDB=0.209376;SGB=9.53539;RPB=0.776805;MQB=1;MQSB=1;BQB=0.907179;MQ0F=0;ICB=0.3;HOB=0.125;AC=1;AN=4;DP4=30,20,10,6;MQ=60;ANN=A	synonymous_variant	LOW	Gene_Vitvi01g01044.t01	Gene_Vitvi01g01044.t01	transcript	Vitvi01g01044.t01	Coding	3\26	c.459C>T	p.His153His	524\2843	459\2652	153\283		,A	downstream_gene_variant	MODIFIER	Gene_Vitvi01g01045.t01	Gene_Vitvi01g01045.t01	transcript	Vitvi01g01045.t01	Coding		c.*3624C>T					3624	GT:PL:DP:AD 0\2:0,105,255:35:35,0 0\2:255,0,255:31:15,16
Noirv2.chr1 12953379 . T C 221.0 . DP=72;VDB=0.0833458;SGB=8.84268;RPB=0.679132;MQB=1;MQSB=1;BQB=0.893367;MQ0F=0;ICB=0.3;HOB=0.125;AC=1;AN=4;DP4=29,21,9,6;MQ=60;ANN=C	synonymous_variant	LOW	Gene_Vitvi01g01044.t01	Gene_Vitvi01g01044.t01	transcript	Vitvi01g01044.t01	Coding	3\26	c.447A>G	p.Ser149Ser	512\2843	447\2652	149\283		,C	downstream_gene_variant	MODIFIER	Gene_Vitvi01g01045.t01	Gene_Vitvi01g01045.t01	transcript	Vitvi01g01045.t01	Coding		c.*3612A>G					3612	GT:PL:DP:AD 0\2:0,105,255:35:35,0 0\2:255,0,255:30:15,15
Noirv2.chr1 12953397 . T C 483.0 . DP=73;VDB=0.722427;SGB=-1.38618;MQSB=1;MQ0F=0;AC=4;AN=4;DP4=0,0,37,27;MQ=60;ANN=C	synonymous_variant	LOW	Gene_Vitvi01g01044.t01	Gene_Vitvi01g01044.t01	transcript	Vitvi01g01044.t01	Coding	3\26	c.429A>G	p.Ser143Ser	494\2843	429\2652	143\283		,C	downstream_gene_variant	MODIFIER	Gene_Vitvi01g01045.t01	Gene_Vitvi01g01045.t01	transcript	Vitvi01g01045.t01	Coding		c.*3594A>G					3594	GT:PL:DP:AD 1\2:255,102,0:34:0,34 1\2:255,90,0:30:0,30
Noirv2.chr1 12953442 . C T 483.0 . DP=74;VDB=0.989358;SGB=-1.3856;MQSB=1;MQ0F=0;AC=4;AN=4;DP4=0,0,37,33;MQ=60;ANN=T	synonymous_variant	LOW	Gene_Vitvi01g01044.t01	Gene_Vitvi01g01044.t01	transcript	Vitvi01g01044.t01	Coding	3\26	c.384G>A	p.Gln128Gln	449\2843	384\2652	128\283		,T	downstream_gene_variant	MODIFIER	Gene_Vitvi01g01045.t01	Gene_Vitvi01g01045.t01	transcript	Vitvi01g01045.t01	Coding		c.*3549G>A					3549	GT:PL:DP:AD 1\2:255,123,0:41:0,41 1\2:255,87,0:29:0,29
Noirv2.chr1 12953460 . A G 221.0 . DP=72;VDB=0.571066;SGB=11.6141;RPB=0.938605;MQB=1;MQSB=1;BQB=0.553236;MQ0F=0;ICB=0.3;HOB=0.125;AC=1;AN=4;DP4=27,23,10,9;MQ=60;ANN=G	synonymous_variant	LOW	Gene_Vitvi01g01044.t01	Gene_Vitvi01g01044.t01	transcript	Vitvi01g01044.t01	Coding	3\26	c.366T>C	p.Asp122Asp	431\2843	366\2652	122\283		,G	downstream_gene_variant	MODIFIER	Gene_Vitvi01g01045.t01	Gene_Vitvi01g01045.t01	transcript	Vitvi01g01045.t01	Coding		c.*3531T>C					3531	GT:PL:DP:AD 0\2:0,129,255:43:43,0 0\2:255,0,134:26:7,19
Noirv2.chr1 12954672 . C T 221.0 . DP=64;VDB=0.964392;SGB=16.4657;RPB=0.410851;MQB=1;MQSB=1;BQB=0.853205;MQ0F=0;ICB=0.3;HOB=0.125;AC=1;AN=4;DP4=14,22,8,18;MQ=60;ANN=T	synonymous_variant	LOW	Gene_Vitvi01g01044.t01	Gene_Vitvi01g01044.t01	transcript	Vitvi01g01044.t01	Coding	2\26	c.267G>A	p.Arg89Arg	332\2843	267\2652	89\283		,T	downstream_gene_variant	MODIFIER	Gene_Vitvi01g01045.t01	Gene_Vitvi01g01045.t01	transcript	Vitvi01g01045.t01	Coding		c.*2319G>A					2319	GT:PL:DP:AD 0\2:255,0,255:42:16,26 0\2:0,60,255:20:20,0
Noirv2.chr1 12954868 . G A 99.0 . DP=50;VDB=0.374571;SGB=2.63044;RPB=0.973056;MQB=1;MQSB=1;BQB=0.605517;MQ0F=0;ICB=0.3;HOB=0.125;AC=1;AN=4;DP4=23,16,2,4;MQ=60;ANN=A	synonymous_variant	LOW	Gene_Vitvi01g01044.t01	Gene_Vitvi01g01044.t01	transcript	Vitvi01g01044.t01	Coding	1\26	c.223C>T	p.Leu75Leu	288\2843	223\2652	75\283		,A	downstream_gene_variant	MODIFIER	Gene_Vitvi01g01045.t01	Gene_Vitvi01g01045.t01	transcript	Vitvi01g01045.t01	Coding		c.*2123C>T					2123	GT:PL:DP:AD 0\2:0,81,255:27:27,0 0\2:133,0,253:18:12,6
Noirv2.chr1 12954902 . G A 221.0 . DP=52;VDB=0.333474;SGB=9.53539;RPB=0.947612;MQB=1;MQSB=1;BQB=0.782784;MQ0F=0;ICB=0.3;HOB=0.125;AC=1;AN=4;DP4=20,12,8,8;MQ=60;ANN=A	synonymous_variant	LOW	Gene_Vitvi01g01044.t01	Gene_Vitvi01g01044.t01	transcript	Vitvi01g01044.t01	Coding	1\26	c.189C>T	p.Leu63Leu	254\2843	189\2652	63\283		,A	downstream_gene_variant	MODIFIER	Gene_Vitvi01g01045.t01	Gene_Vitvi01g01045.t01	transcript	Vitvi01g01045.t01	Coding		c.*2089C>T					2089	GT:PL:DP:AD 0\2:255,0,215:29:13,16 0\2:0,57,255:19:19,0
Noirv2.chr1 12954926 . A T 483.0 . DP=43;VDB=0.326214;SGB=-1.35813;MQSB=1;MQ0F=0;AC=4;AN=4;DP4=0,0,24,15;MQ=60;ANN=T	synonymous_variant	LOW	Gene_Vitvi01g01044.t01	Gene_Vitvi01g01044.t01	transcript	Vitvi01g01044.t01	Coding	1\26	c.165T>A	p.Val55Val	230\2843	165\2652	55\283		,T	downstream_gene_variant	MODIFIER	Gene_Vitvi01g01045.t01	Gene_Vitvi01g01045.t01	transcript	Vitvi01g01045.t01	Coding		c.*2065T>A					2065	GT:PL:DP:AD 1\2:255,72,0:24:0,24 1\2:255,45,0:15:0,15
Noirv2.chr1 12954968 . T G 483.0 . DP=42;VDB=0.635483;SGB=-1.37443;MQSB=1;MQ0F=0;AC=4;AN=4;DP4=0,0,23,15;MQ=60;ANN=G	synonymous_variant	LOW	Gene_Vitvi01g01044.t01	Gene_Vitvi01g01044.t01	transcript	Vitvi01g01044.t01	Coding	1\26	c.123A>C	p.Gly41Gly	188\2843	123\2652	41\283		,G	downstream_gene_variant	MODIFIER	Gene_Vitvi01g01045.t01	Gene_Vitvi01g01045.t01	transcript	Vitvi01g01045.t01	Coding		c.*2023A>C					2023	GT:PL:DP:AD 1\2:255,66,0:22:0,22 1\2:255,48,0:16:0,16
Noirv2.chr1 12961701 . G A 7.01214 . DP=1;SGB=-0.157211;MQ0F=0;AC=2;AN=2;DP4=0,0,1,0;MQ=33;ANN=A	synonymous_variant	LOW	Gene_Vitvi01g01045.t01	Gene_Vitvi01g01045.t01	transcript	Vitvi01g01045.t01	Coding	3\2	c.39C>T	p.Tyr13Tyr	39\23	39\23	13\20		,A	downstream_gene_variant	MODIFIER	Gene_Vitvi01g01046.t01	Gene_Vitvi01g01046.t01	transcript	Vitvi01g01046.t01	Coding		c.*2504C>T					2504	,A	downstream_gene_variant	MODIFIER	Gene_Vitvi01g01047.t01	Gene_Vitvi01g01047.t01	transcript	Vitvi01g01047.t01	Coding		c.*3597C>T					3597	GT:PL:DP:AD 1\2:33,3,0:1:0,1 ./.:0,0,0:0:0,0
Noirv2.chr1 12966394 . G A 284.0 . DP=17;VDB=3.09268e-05;SGB=-1.03471;MQ0F=0;AC=4;AN=4;DP4=0,0,17,0;MQ=42;ANN=A	synonymous_variant	LOW	Gene_Vitvi01g01047.t01	Gene_Vitvi01g01047.t01	transcript	Vitvi01g01047.t01	Coding	2\2	c.255C>T	p.Thr85Thr	255\222	255\222	85\273		,A	upstream_gene_variant	MODIFIER	Gene_Vitvi01g01045.t01	Gene_Vitvi01g01045.t01	transcript	Vitvi01g01045.t01	Coding		c.-3757C>T					3757	,A	upstream_gene_variant	MODIFIER	Gene_Vitvi01g01046.t01	Gene_Vitvi01g01046.t01	transcript	Vitvi01g01046.t01	Coding		c.-1823C>T					1823	GT:PL:DP:AD 1\2:130,15,0:5:0,5 1\2:181,36,0:12:0,12
Noirv2.chr1 12966415 . G A 340.0 . DP=25;VDB=0.109752;SGB=-1.30398;MQ0F=0;AC=4;AN=4;DP4=0,0,23,0;MQ=44;ANN=A	synonymous_variant	LOW	Gene_Vitvi01g01047.t01	Gene_Vitvi01g01047.t01	transcript	Vitvi01g01047.t01	Coding	2\2	c.234C>T	p.Ile78Ile	234\222	234\222	78\273		,A	upstream_gene_variant	MODIFIER	Gene_Vitvi01g01045.t01	Gene_Vitvi01g01045.t01	transcript	Vitvi01g01045.t01	Coding		c.-3778C>T					3778	,A	upstream_gene_variant	MODIFIER	Gene_Vitvi01g01046.t01	Gene_Vitvi01g01046.t01	transcript	Vitvi01g01046.t01	Coding		c.-1844C>T					1844	GT:PL:DP:AD 1\2:174,27,0:9:0,9 1\2:193,42,0:14:0,14
Noirv2.chr1 12966418 . T A 315.0 . DP=26;VDB=0.190797;SGB=-1.30398;RPB=1;MQB=1;BQB=1;MQ0F=0;AC=4;AN=4;DP4=1,0,23,0;MQ=44;ANN=A	synonymous_variant	LOW	Gene_Vitvi01g01047.t01	Gene_Vitvi01g01047.t01	transcript	Vitvi01g01047.t01	Coding	2\2	c.231A>T	p.Ser77Ser	231\222	231\222	77\273		,A	upstream_gene_variant	MODIFIER	Gene_Vitvi01g01045.t01	Gene_Vitvi01g01045.t01	transcript	Vitvi01g01045.t01	Coding		c.-3781A>T					3781	,A	upstream_gene_variant	MODIFIER	Gene_Vitvi01g01046.t01	Gene_Vitvi01g01046.t01	transcript	Vitvi01g01046.t01	Coding		c.-1847A>T					1847	GT:PL:DP:AD 1\2:174,27,0:9:0,9 1\2:165,9,0:15:1,14
Noirv2.chr1 12966442 . G A 335.0 . DP=22;VDB=0.199618;SGB=-1.34449;MQ0F=0;AC=4;AN=4;DP4=0,0,21,0;MQ=47;ANN=A	splice_region_variant&intron_variant	LOW	Gene_Vitvi01g01047.t01	Gene_Vitvi01g01047.t01	transcript	Vitvi01g01047.t01	Coding	1\2	c.213-6C>T						,A	upstream_gene_variant	MODIFIER	Gene_Vitvi01g01045.t01	Gene_Vitvi01g01045.t01	transcript	Vitvi01g01045.t01	Coding		c.-3805C>T					3805	,A	upstream_gene_variant	MODIFIER	Gene_Vitvi01g01046.t01	Gene_Vitvi01g01046.t01	transcript	Vitvi01g01046.t01	Coding		c.-1871C>T					1871	GT:PL:DP:AD 1\2:179,30,0:10:0,10 1\2:183,33,0:11:0,11
Noirv2.chr1 12966444 . T G 338.0 . DP=22;VDB=0.219549;SGB=-1.34449;MQ0F=0;AC=4;AN=4;DP4=0,0,21,0;MQ=47;ANN=G	splice_region_variant&intron_variant	LOW	Gene_Vitvi01g01047.t01	Gene_Vitvi01g01047.t01	transcript	Vitvi01g01047.t01	Coding	1\2	c.213-8A>C						,G	upstream_gene_variant	MODIFIER	Gene_Vitvi01g01045.t01	Gene_Vitvi01g01045.t01	transcript	Vitvi01g01045.t01	Coding		c.-3807A>C					3807	,G	upstream_gene_variant	MODIFIER	Gene_Vitvi01g01046.t01	Gene_Vitvi01g01046.t01	transcript	Vitvi01g01046.t01	Coding		c.-1873A>C					1873	GT:PL:DP:AD 1\2:183,30,0:10:0,10 1\2:182,33,0:11:0,11
Noirv2.chr1 12966535 . G A 128.0 . DP=44;VDB=0.16077;SGB=6.07412;RPB=0.92293;MQB=0.444722;MQSB=0.591727;BQB=0.84201;MQ0F=0;ICB=0.3;HOB=0.125;AC=1;AN=4;DP4=26,5,10,1;MQ=55;ANN=A	synonymous_variant	LOW	Gene_Vitvi01g01047.t01	Gene_Vitvi01g01047.t01	transcript	Vitvi01g01047.t01	Coding	1\2	c.195C>T	p.Ser65Ser	195\222	195\222	65\273		,A	upstream_gene_variant	MODIFIER	Gene_Vitvi01g01045.t01	Gene_Vitvi01g01045.t01	transcript	Vitvi01g01045.t01	Coding		c.-3898C>T					3898	,A	upstream_gene_variant	MODIFIER	Gene_Vitvi01g01046.t01	Gene_Vitvi01g01046.t01	transcript	Vitvi01g01046.t01	Coding		c.-1964C>T					1964	GT:PL:DP:AD 0\2:0,57,255:19:19,0 0\2:162,0,216:23:12,11
Noirv2.chr1 12966547 . A C 32.5803 . DP=43;VDB=0.077463;SGB=1.27626;RPB=0.981582;MQB=0.589333;MQSB=0.700503;BQB=0.717921;MQ0F=0;ICB=0.3;HOB=0.125;AC=1;AN=4;DP4=32,6,3,1;MQ=55;ANN=C	synonymous_variant	LOW	Gene_Vitvi01g01047.t01	Gene_Vitvi01g01047.t01	transcript	Vitvi01g01047.t01	Coding	1\2	c.183T>G	p.Leu61Leu	183\222	183\222	61\273		,C	upstream_gene_variant	MODIFIER	Gene_Vitvi01g01045.t01	Gene_Vitvi01g01045.t01	transcript	Vitvi01g01045.t01	Coding		c.-3910T>G					3910	,C	upstream_gene_variant	MODIFIER	Gene_Vitvi01g01046.t01	Gene_Vitvi01g01046.t01	transcript	Vitvi01g01046.t01	Coding		c.-1976T>G					1976	GT:PL:DP:AD 0\2:0,57,255:19:19,0 0\2:68,0,246:23:19,4
Noirv2.chr1 12966556 . A G 228.0 . DP=30;VDB=0.101596;SGB=11.1316;MQSB=0.604224;MQ0F=0;AC=2;AN=2;DP4=0,0,15,5;MQ=54;ANN=G	synonymous_variant	LOW	Gene_Vitvi01g01047.t01	Gene_Vitvi01g01047.t01	transcript	Vitvi01g01047.t01	Coding	1\2	c.174T>C	p.His58His	174\222	174\222	58\273		,G	upstream_gene_variant	MODIFIER	Gene_Vitvi01g01045.t01	Gene_Vitvi01g01045.t01	transcript	Vitvi01g01045.t01	Coding		c.-3919T>C					3919	,G	upstream_gene_variant	MODIFIER	Gene_Vitvi01g01046.t01	Gene_Vitvi01g01046.t01	transcript	Vitvi01g01046.t01	Coding		c.-1985T>C					1985	GT:PL:DP:AD ./.:0,0,0:0:0,0 1\2:255,60,0:20:0,20
Noirv2.chr1 12966586 . G A 353.0 . DP=17;VDB=0.0115991;SGB=-1.27426;MQSB=0.526752;MQ0F=0;AC=4;AN=4;DP4=0,0,13,4;MQ=54;ANN=A	synonymous_variant	LOW	Gene_Vitvi01g01047.t01	Gene_Vitvi01g01047.t01	transcript	Vitvi01g01047.t01	Coding	1\2	c.144C>T	p.Ser48Ser	144\222	144\222	48\273		,A	upstream_gene_variant	MODIFIER	Gene_Vitvi01g01045.t01	Gene_Vitvi01g01045.t01	transcript	Vitvi01g01045.t01	Coding		c.-3949C>T					3949	,A	upstream_gene_variant	MODIFIER	Gene_Vitvi01g01046.t01	Gene_Vitvi01g01046.t01	transcript	Vitvi01g01046.t01	Coding		c.-2015C>T					2015	GT:PL:DP:AD 1\2:194,30,0:10:0,10 1\2:186,21,0:7:0,7
Noirv2.chr1 12966658 . G A 7.83031 . DP=1;SGB=-0.157211;MQ0F=0;AC=2;AN=2;DP4=0,0,1,0;MQ=60;ANN=A	synonymous_variant	LOW	Gene_Vitvi01g01047.t01	Gene_Vitvi01g01047.t01	transcript	Vitvi01g01047.t01	Coding	1\2	c.72C>T	p.His24His	72\222	72\222	24\273		,A	upstream_gene_variant	MODIFIER	Gene_Vitvi01g01045.t01	Gene_Vitvi01g01045.t01	transcript	Vitvi01g01045.t01	Coding		c.-4021C>T					4021	,A	upstream_gene_variant	MODIFIER	Gene_Vitvi01g01046.t01	Gene_Vitvi01g01046.t01	transcript	Vitvi01g01046.t01	Coding		c.-2087C>T					2087	GT:PL:DP:AD ./.:0,0,0:0:0,0 1\2:34,3,0:1:0,1
Noirv2.chr1 12987606 . A T 62.0 . DP=31;VDB=0.191063;SGB=1.94933;RPB=0.898825;MQB=0.786628;MQSB=0.876998;BQB=0.0131019;MQ0F=0;ICB=0.3;HOB=0.125;AC=1;AN=4;DP4=6,18,2,3;MQ=59;ANN=T	splice_region_variant	LOW	Gene_Vitvi01g01048.t01	Gene_Vitvi01g01048.t01	transcript	Vitvi01g01048.t01	Coding	3\2	c.*272T>A						,T	3_prime_UTR_variant	MODIFIER	Gene_Vitvi01g01048.t01	Gene_Vitvi01g01048.t01	transcript	Vitvi01g01048.t01	Coding	3\2	c.*272T>A					6595	GT:PL:DP:AD 0\2:96,0,147:13:8,5 0\2:0,48,255:16:16,0
Noirv2.chr1 12987607 . A G 466.0 . DP=31;VDB=0.00264494;SGB=-1.35517;RPB=0.738045;MQB=0.989637;MQSB=0.876998;BQB=0.398353;MQ0F=0;ICB=0.3;HOB=0.125;AC=3;AN=4;DP4=2,3,6,18;MQ=59;ANN=G	splice_region_variant	LOW	Gene_Vitvi01g01048.t01	Gene_Vitvi01g01048.t01	transcript	Vitvi01g01048.t01	Coding	3\2	c.*271T>C						,G	3_prime_UTR_variant	MODIFIER	Gene_Vitvi01g01048.t01	Gene_Vitvi01g01048.t01	transcript	Vitvi01g01048.t01	Coding	3\2	c.*271T>C					6594	GT:PL:DP:AD 1\2:253,39,0:13:0,13 0\2:247,0,104:16:5,11
Noirv2.chr1 12987635 . G A 447.0 . DP=24;VDB=3.41442e-08;SGB=-1.32409;RPB=0.996383;MQB=0.985612;MQSB=0.924723;BQB=0.516683;MQ0F=0;ICB=0.3;HOB=0.125;AC=3;AN=4;DP4=2,2,8,10;MQ=58;ANN=A	splice_region_variant	LOW	Gene_Vitvi01g01048.t01	Gene_Vitvi01g01048.t01	transcript	Vitvi01g01048.t01	Coding	3\2	c.*243C>T						,A	3_prime_UTR_variant	MODIFIER	Gene_Vitvi01g01048.t01	Gene_Vitvi01g01048.t01	transcript	Vitvi01g01048.t01	Coding	3\2	c.*243C>T					6566	GT:PL:DP:AD 1\2:255,27,0:9:0,9 0\2:226,0,101:13:4,9
Noirv2.chr1 12994752 . G A 483.0 . DP=68;VDB=0.294404;SGB=-1.38539;MQSB=1;MQ0F=0;AC=4;AN=4;DP4=0,0,38,19;MQ=60;ANN=A	synonymous_variant	LOW	Gene_Vitvi01g01048.t01	Gene_Vitvi01g01048.t01	transcript	Vitvi01g01048.t01	Coding	1\2	c.474C>T	p.Leu158Leu	580\281	474\203	158\200		,A	upstream_gene_variant	MODIFIER	Gene_Vitvi01g01049.t01	Gene_Vitvi01g01049.t01	transcript	Vitvi01g01049.t01	Coding		c.-2004G>A					2004	GT:PL:DP:AD 1\2:255,96,0:32:0,32 1\2:255,75,0:25:0,25
Noirv2.chr1 12994757 . A G 458.0 . DP=67;VDB=0.0836687;SGB=-1.20102;RPB=0.987898;MQB=1;MQSB=1;BQB=0.76709;MQ0F=0;ICB=0.3;HOB=0.125;AC=3;AN=4;DP4=7,5,28,14;MQ=60;ANN=G	synonymous_variant	LOW	Gene_Vitvi01g01048.t01	Gene_Vitvi01g01048.t01	transcript	Vitvi01g01048.t01	Coding	1\2	c.469T>C	p.Leu157Leu	575\281	469\203	157\200		,G	upstream_gene_variant	MODIFIER	Gene_Vitvi01g01049.t01	Gene_Vitvi01g01049.t01	transcript	Vitvi01g01049.t01	Coding		c.-1999A>G					1999	GT:PL:DP:AD 1\2:255,87,0:29:0,29 0\2:237,0,215:25:12,13
Noirv2.chr1 12994806 . A C 483.0 . DP=72;VDB=0.876445;SGB=-1.37081;MQSB=1;MQ0F=0;AC=4;AN=4;DP4=0,0,32,29;MQ=60;ANN=C	synonymous_variant	LOW	Gene_Vitvi01g01048.t01	Gene_Vitvi01g01048.t01	transcript	Vitvi01g01048.t01	Coding	1\2	c.420T>G	p.Val140Val	526\281	420\203	140\200		,C	upstream_gene_variant	MODIFIER	Gene_Vitvi01g01049.t01	Gene_Vitvi01g01049.t01	transcript	Vitvi01g01049.t01	Coding		c.-1950A>C					1950	GT:PL:DP:AD 1\2:255,117,0:39:0,39 1\2:255,66,0:22:0,22
Noirv2.chr1 12994851 . C G 148.0 . DP=58;VDB=0.453107;SGB=4.69269;RPB=0.966906;MQB=1;MQSB=1;BQB=0.658436;MQ0F=0;ICB=0.3;HOB=0.125;AC=1;AN=4;DP4=21,21,5,4;MQ=60;ANN=G	synonymous_variant	LOW	Gene_Vitvi01g01048.t01	Gene_Vitvi01g01048.t01	transcript	Vitvi01g01048.t01	Coding	1\2	c.375G>C	p.Ala125Ala	481\281	375\203	125\200		,G	upstream_gene_variant	MODIFIER	Gene_Vitvi01g01049.t01	Gene_Vitvi01g01049.t01	transcript	Vitvi01g01049.t01	Coding		c.-1905C>G					1905	GT:PL:DP:AD 0\2:0,102,255:34:34,0 0\2:182,0,153:17:8,9
Noirv2.chr1 12995145 . T G 433.0 . DP=54;VDB=0.129857;SGB=-8.71242;RPB=0.688814;MQB=1;MQSB=1;BQB=0.168629;MQ0F=0;ICB=0.5;HOB=0.5;AC=2;AN=4;DP4=17,8,12,10;MQ=60;ANN=G	synonymous_variant	LOW	Gene_Vitvi01g01048.t01	Gene_Vitvi01g01048.t01	transcript	Vitvi01g01048.t01	Coding	1\2	c.81A>C	p.Ser27Ser	187\281	81\203	27\200		,G	upstream_gene_variant	MODIFIER	Gene_Vitvi01g01049.t01	Gene_Vitvi01g01049.t01	transcript	Vitvi01g01049.t01	Coding		c.-1611T>G					1611	GT:PL:DP:AD 0\2:229,0,203:20:10,10 0\2:237,0,215:27:15,12
Noirv2.chr1 12995205 . G A 379.0 . DP=53;VDB=0.949945;SGB=-8.71242;RPB=0.572997;MQB=1;MQSB=1;BQB=0.993149;MQ0F=0;ICB=0.5;HOB=0.5;AC=2;AN=4;DP4=17,8,16,6;MQ=60;ANN=A	synonymous_variant	LOW	Gene_Vitvi01g01048.t01	Gene_Vitvi01g01048.t01	transcript	Vitvi01g01048.t01	Coding	1\2	c.21C>T	p.Phe7Phe	127\281	21\203	7\200		,A	upstream_gene_variant	MODIFIER	Gene_Vitvi01g01049.t01	Gene_Vitvi01g01049.t01	transcript	Vitvi01g01049.t01	Coding		c.-1551G>A					1551	GT:PL:DP:AD 0\2:201,0,221:20:9,11 0\2:211,0,236:27:16,11
Noirv2.chr1 12996842 . C T 477.0 . DP=62;VDB=0.519454;SGB=-11.4741;RPB=0.600849;MQB=1;MQSB=1;BQB=0.649364;MQ0F=0;ICB=0.5;HOB=0.5;AC=2;AN=4;DP4=14,12,15,16;MQ=60;ANN=T	synonymous_variant	LOW	Gene_Vitvi01g01049.t01	Gene_Vitvi01g01049.t01	transcript	Vitvi01g01049.t01	Coding	1\2	c.87C>T	p.Ser29Ser	87\250	87\243	29\280		,T	upstream_gene_variant	MODIFIER	Gene_Vitvi01g01048.t01	Gene_Vitvi01g01048.t01	transcript	Vitvi01g01048.t01	Coding		c.-1617G>A					1511	GT:PL:DP:AD 0\2:255,0,255:33:17,16 0\2:255,0,168:24:9,15
Noirv2.chr1 12996851 . G A 221.0 . DP=63;VDB=0.87833;SGB=10.2282;RPB=0.73872;MQB=1;MQSB=1;BQB=0.664711;MQ0F=0;ICB=0.3;HOB=0.125;AC=1;AN=4;DP4=20,22,10,7;MQ=60;ANN=A	synonymous_variant	LOW	Gene_Vitvi01g01049.t01	Gene_Vitvi01g01049.t01	transcript	Vitvi01g01049.t01	Coding	1\2	c.96G>A	p.Ala32Ala	96\250	96\243	32\280		,A	upstream_gene_variant	MODIFIER	Gene_Vitvi01g01048.t01	Gene_Vitvi01g01048.t01	transcript	Vitvi01g01048.t01	Coding		c.-1626C>T					1520	GT:PL:DP:AD 0\2:255,0,255:34:17,17 0\2:0,75,255:25:25,0
Noirv2.chr1 12996866 . C A 419.0 . DP=63;VDB=0.506231;SGB=-10.8604;RPB=0.743573;MQB=1;MQSB=1;BQB=0.787057;MQ0F=0;ICB=0.5;HOB=0.5;AC=2;AN=4;DP4=16,13,14,15;MQ=60;ANN=A	synonymous_variant	LOW	Gene_Vitvi01g01049.t01	Gene_Vitvi01g01049.t01	transcript	Vitvi01g01049.t01	Coding	1\2	c.111C>A	p.Ala37Ala	111\250	111\243	37\280		,A	upstream_gene_variant	MODIFIER	Gene_Vitvi01g01048.t01	Gene_Vitvi01g01048.t01	transcript	Vitvi01g01048.t01	Coding		c.-1641G>T					1535	GT:PL:DP:AD 0\2:255,0,255:38:19,19 0\2:197,0,217:20:10,10
[truncated: 69,201 more rows]
[truncated: 110 more columns]
